# Supplementary material for: An annotated list of bivalent chromatin regions in human ES cells: a new tool for cancer epigenetic research
Source: PubMed Central journal article supplement (PMC5354816; doi:10.18632/oncotarget.13746), 2016-12-01
Supplement: oncotarget-08-4110-s001.pdf [file oncotarget-08-4110-s001.pdf]

# An annotated list of bivalent chromatin regions in human ES cells: a new tool for cancer epigenetic research

## Supplementary Materials

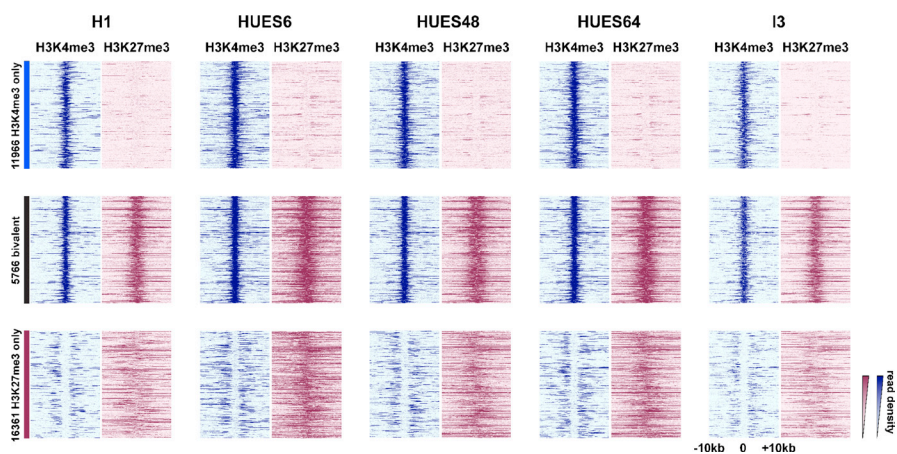

**Supplementary Figure S1: H3K27me3 and H3K4me3 enrichment at bivalent, H3K4me3- and H3K27me3-only regions.** Chip-seq read density for H3K27me3 (purple) and H3K4me3 (blue) at high-confidence H3K4me3-only, bivalent and H3K27me3-only regions in each hESC line. Each line represents one genomic region. A -10Kb to +10 Kb window centered on the peak of the signal is shown.



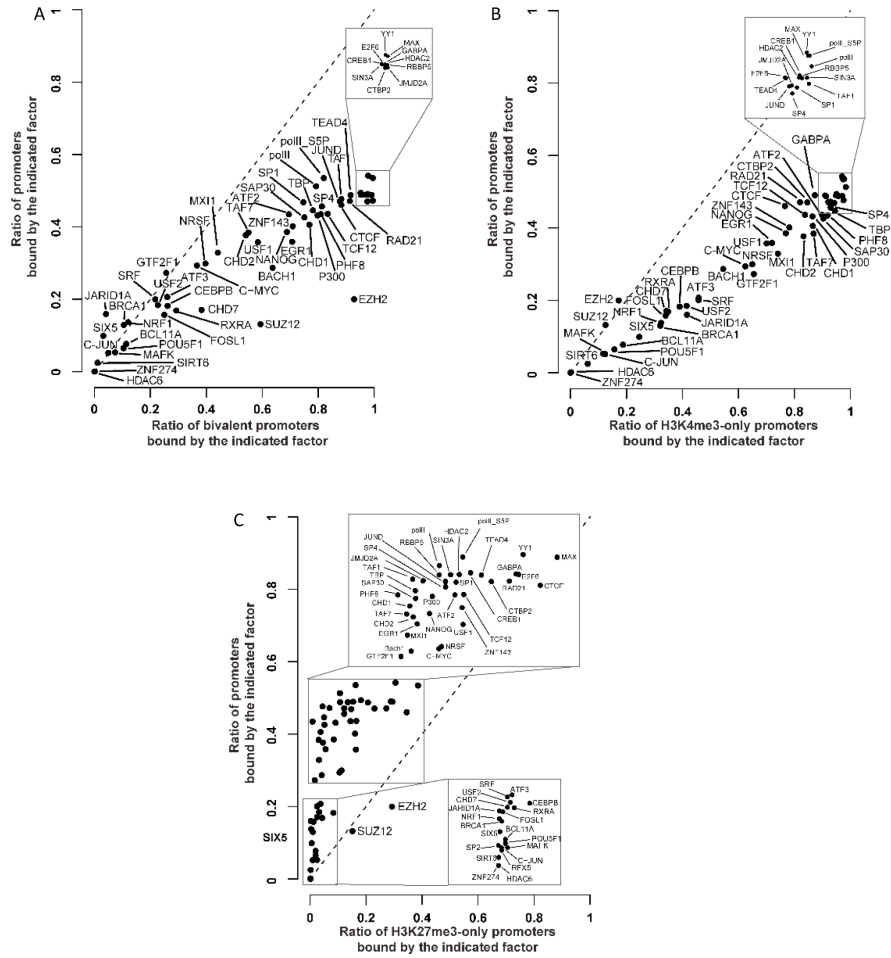

**Supplementary Figure S4: Transcription factor occupancy at promoters.** Transcription factors occupancy at bivalent (A), H3K4me3-only (B) and H3K27me3-only (C) promoters versus all promoters.

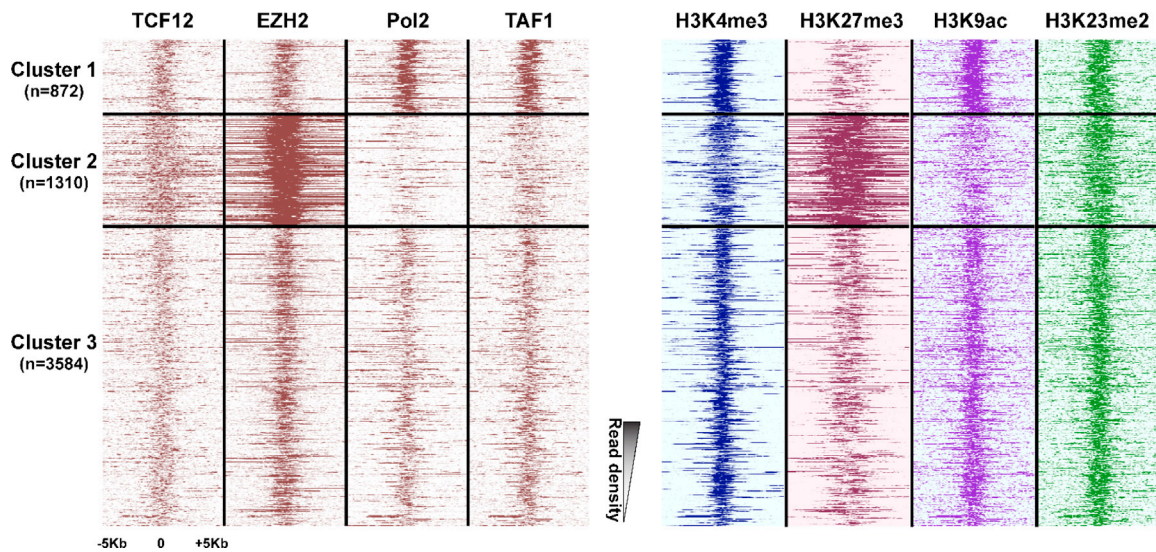

**Supplementary Figure S5: Three clusters of high-confidence bivalent regions in hESCs.** All bivalent regions were classified in three clusters based on the extent and density of the EZH2, PolII, TAF1 and TCF-12 signals. Cluster 2 is characterized by a strong and extended signal for EZH2 and H3K27me3.

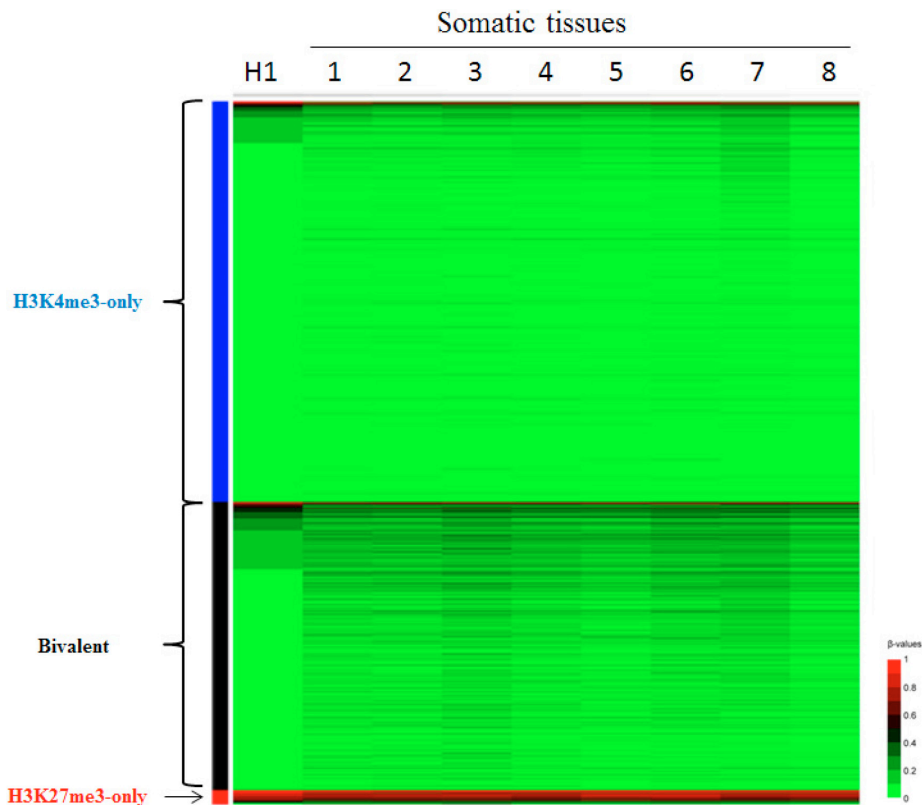

**Supplementary Figure S6: CGIs DNA methylation pattern observed in hESC is globally maintained in somatic tissues.** Methylation level of CGIs ( $\beta$ -values) in H1 hESCs and the somatic tissues used as tumor samples matched control, according to their chromatin signature in hESC. The overall DNA methylation pattern observed in hESCs is maintained in normal tissues with the majority of CGIs marked by bivalency and H3K4me3-only in hESCs remaining unmethylated. Somatic tissues analyzed are the normal matched control of (1) BLCA: bladder urothelial carcinoma; (2) BRCA: breast invasive carcinoma; (3) COAD: colon adenocarcinoma; (4) HNSC: head-neck squamous cell carcinoma; KIRP: (5) kidney renal papillary cell carcinoma; (6) LIHC: liver hepatocellular carcinoma; (7) LUSC: lung squamous cell carcinoma and (8) LUAD: lung adenocarcinoma tumor type, respectively

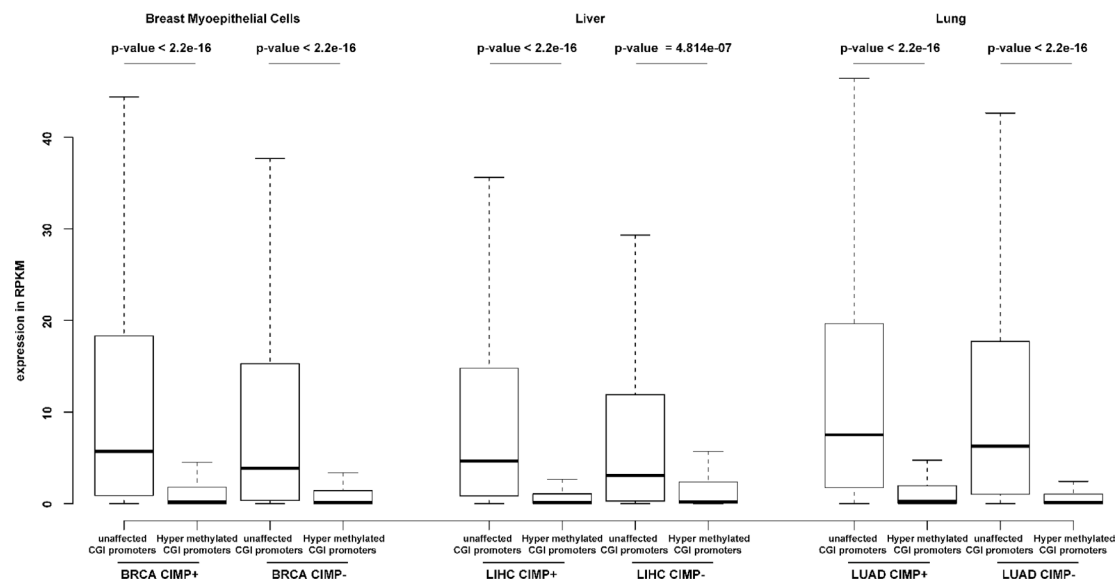

**Supplementary Figure S7: Genes with aberrantly hypermethylated CGI/promoter in tumors tend to be repressed in the corresponding healthy tissue.** Boxplots of the expression levels measured in healthy tissues of genes with unaffected or hypermethylated CGI/promoter in the corresponding CIMP-positive (+) and CIMP-negative (-) tumors ( $p$ -value: Mann-Whitney test). BRCA: breast invasive carcinoma; LIHC: liver hepatocellular carcinoma; LUAD: lung adenocarcinoma.

**Supplementary Table S1: Details of the datasets used in this study (obtained from the NIH Roadmap Epigenomics project <http://www.ncbi.nlm.nih.gov/geo/roadmap/epigenomics/>)**

| Cell line | Series            | Experiment | Dataset   | Medium | Antibody         |
|-----------|-------------------|------------|-----------|--------|------------------|
| ES H1     | Dataset series 1  | input      | GSM433179 | TESR   |                  |
|           |                   | H3K27me3   | GSM537683 | TESR   | Millipore 07-449 |
|           |                   | H3K4me3    | GSM537681 | TESR   | Millipore 07-473 |
|           | Dataset series 2  | input      | GSM605335 | mTeSER |                  |
|           |                   | H3K27me3   | GSM605308 | mTeSER | Millipore 07-449 |
|           |                   | H3K4me3    | GSM605315 | mTeSER | Millipore 04-745 |
|           | Dataset series 3  | input      | GSM605339 | mTeSER |                  |
|           |                   | H3K27me3   | GSM466734 | mTeSER | Upstate 07-449   |
|           |                   | H3K4me3    | GSM469971 | mTeSER | Abcam ab8580     |
| ES -I3    | Dataset series 4  | input      | GSM537647 | KSR    |                  |
|           |                   | H3K27me3   | GSM537648 | KSR    | Millipore 07-449 |
|           |                   | H3K4me3    | GSM537665 | KSR    | Millipore 07-473 |
|           | Dataset series 5  | input      | GSM621386 | TESR   |                  |
|           |                   | H3K27me3   | GSM537627 | TESR   | Millipore 07-449 |
|           |                   | H3K4me3    | GSM537626 | TESR   | Millipore 07-473 |
| HUES64    | Dataset series 6  | input      | GSM772754 | KSR    |                  |
|           |                   | H3K27me3   | GSM772750 | KSR    | Millipore 07-449 |
|           |                   | H3K4me3    | GSM772752 | KSR    | Millipore 07-473 |
|           | Dataset series 7  | input      | GSM772807 | KSR    |                  |
|           |                   | H3K27me3   | GSM669974 | KSR    | Millipore 07-449 |
|           |                   | H3K4me3    | GSM669967 | KSR    | Millipore 07-473 |
| HUES6     | Dataset series 8  | input      | GSM669888 | KSR    |                  |
|           |                   | H3K27me3   | GSM669887 | KSR    | Millipore 07-449 |
|           |                   | H3K4me3    | GSM669889 | KSR    | Millipore 07-473 |
|           | Dataset series 9  | input      | GSM669895 | KSR    |                  |
|           |                   | H3K27me3   | GSM669897 | KSR    | Millipore 07-449 |
|           |                   | H3K4me3    | GSM669893 | KSR    | Millipore 07-473 |
| HUES48    | Dataset series 10 | input      | GSM772755 | KSR    |                  |
|           |                   | H3K27me3   | GSM669942 | KSR    | Millipore 07-449 |
|           |                   | H3K4me3    | GSM669936 | KSR    | Millipore 07-473 |
|           | Dataset series 11 | input      | GSM772794 | KSR    |                  |
|           |                   | H3K27me3   | GSM772766 | KSR    | Millipore 07-449 |
|           |                   | H3K4me3    | GSM772797 | KSR    | Millipore 07-473 |

**Supplementary Table S2: Number of ChIP-seq tags after filtering, and peak calling parameters for each hESC line used in this study. See Supplementry\_Table\_S2**

**Supplementary Table S3: Results of peak calling analyses for each hESC line**

| hESC line | Histone mark | Total peaks | Peaks wider than 1kb | Total bivalent | Bivalent identified | Bivalent cell-specific |
|-----------|--------------|-------------|----------------------|----------------|---------------------|------------------------|
| ES H1     | H3K27me3     | 80064       | 21447                | 12402          | 7783                | 239                    |
|           | H3K4me3      | 26354       | 19390                |                |                     |                        |
| ES -I3    | H3K27me3     | 92099       | 20713                |                | 7756                | 283                    |
|           | H3K4me3      | 50312       | 25650                |                |                     |                        |
| HUES64    | H3K27me3     | 60580       | 25288                |                | 9824                | 585                    |
|           | H3K4me3      | 34488       | 26204                |                |                     |                        |
| HUES6     | H3K27me3     | 73140       | 41727                |                | 10266               | 1031                   |
|           | H3K4me3      | 39677       | 29132                |                |                     |                        |
| HUES48    | H3K27me3     | 56163       | 23971                |                | 8508                | 239                    |
|           | H3K4me3      | 43417       | 28581                |                |                     |                        |

**Supplementary Table S4: Genomic features associated with H3K4me3-only, bivalent and H3K27me3-only regions**

|                 |                              | H3K4me3-only |              | Bivalent    |              | H3K27me3-only |              |
|-----------------|------------------------------|--------------|--------------|-------------|--------------|---------------|--------------|
|                 |                              | Number       | % of total   | Number      | % of total   | Number        | % of total   |
| CpG islands     | Promoter                     | 7295         | 61.0%        | 4080        | 70.8%        | 248           | 1.5%         |
|                 | Gene body                    | 245          | 2.0%         | 491         | 8.5%         | 228           | 1.4%         |
|                 | Intergenic                   | 262          | 2.2%         | 658         | 11.4%        | 164           | 1.0%         |
|                 | <b>Total CpG islands</b>     | <b>7802</b>  | <b>65.2%</b> | <b>5229</b> | <b>90.7%</b> | <b>640</b>    | <b>3.9%</b>  |
| Non-CpG islands | Promoter                     | 1578         | 13.2%        | 250         | 4.3%         | 3775          | 23.1%        |
|                 | Gene body                    | 1417         | 11.8%        | 96          | 1.7%         | 5653          | 34.6%        |
|                 | Intergenic                   | 1169         | 9.8%         | 191         | 3.3%         | 6293          | 38.5%        |
|                 | <b>Total non-CpG islands</b> | <b>4164</b>  | <b>34.8%</b> | <b>537</b>  | <b>9.3%</b>  | <b>15721</b>  | <b>96.1%</b> |
|                 | <b>Total</b>                 | <b>11966</b> | <b>100%</b>  | <b>5766</b> | <b>100%</b>  | <b>16361</b>  | <b>100%</b>  |

**Supplementary Table S5: ChIP-seq datasets for the histone modifications used in this study. (98 + 10 datasets from GSE17312, GSE16368 or GSE16256). See Supplementry\_Table\_S5.**

**Supplementary Table S6: ChIP-seq datasets for transcription factors in the hESC line H1 used in this study. See Supplementry\_Table\_S6.**

**Supplementary Table S7: Details of the coverage for the EPIC (upper table) and HM450K (lower table) arrays. HC, high confidence. See Supplementry\_Table\_S7.**

**Supplementary Table S8: Datasets extracted from the TCGA data portal for cancer methylation analyses.** BLCA = bladder urothelial carcinoma; BRCA = breast invasive carcinoma; COAD = colon adenocarcinoma; HNSC = head-neck squamous cell carcinoma; KIRP = kidney renal papillary cell carcinoma; LIHC = liver hepatocellular carcinoma; LUSC = lung squamous cell carcinoma; LUAD = lung adenocarcinoma; NT = Normal Matched Tumor; TN = Tumor Matched Normal. See Supplementary\_Table\_S8.

**Supplementary Table S9: Details on CIMP status definition for each tumor type**

|                                              | number of HM450K probes defining the CIMP status | number of associated loci (CGI) | Proportion of CGI in bivalent-only regions | Proportion of CGI in H3K4me3-only regions | Proportion of CGI in H3K27me3-only regions |
|----------------------------------------------|--------------------------------------------------|---------------------------------|--------------------------------------------|-------------------------------------------|--------------------------------------------|
| Bladder urothelial carcinoma (BLCA)          | 338                                              | 242                             | 66,5%                                      | 8,7%                                      | 0,8%                                       |
| Breast invasive carcinoma (BRCA)             | 1311                                             | 852                             | 74,1%                                      | 4,5%                                      | 1,1%                                       |
| Colon adenocarcinoma (COAD)                  | 2656                                             | 1252                            | 74,0%                                      | 9,2%                                      | 0,2%                                       |
| Head-neck squamous cell carcinoma (HNSC)     | 1228                                             | 728                             | 70,1%                                      | 10,6%                                     | 0,4%                                       |
| Kidney renal papillary cell carcinoma (KIRP) | 40                                               | 36                              | 52,8%                                      | 8,3%                                      | 8,3%                                       |
| Liver hepatocellular carcinoma (LIHC)        | 544                                              | 382                             | 62,3%                                      | 13,1%                                     | 0,0%                                       |
| Lung adenocarcinoma (LUAD)                   | 1667                                             | 998                             | 73,0%                                      | 2,7%                                      | 1,5%                                       |
| Lung squamous cell carcinoma (LUSC)          | 1430                                             | 855                             | 66,0%                                      | 5,7%                                      | 1,5%                                       |

HM450K probes defining the CIMP status are issued from [45]. The vast majority of CGI defining the CIMP status are marked by a bivalent signature in hES cells.

**Supplementary Table S10: Distribution (percentage) of hyper- (upper table) and hypo- (lower table) methylated probes in CIMP-negative (-) and CIMP-positive (+) tumors (eight cancer types), according to the chromatin signature in hESCs.** The number of affected genomic regions is indicated into brackets. BLCA: bladder urothelial carcinoma; BRCA: breast invasive carcinoma; COAD: colon adenocarcinoma; HNSC: head-neck squamous cell carcinoma; KIRP: kidney renal papillary cell carcinoma; LIHC: liver hepatocellular carcinoma; LUSC: lung squamous cell carcinoma; LUAD: lung adenocarcinoma. See Supplementary\_Table\_S10

**Supplementary File S1: Annotated lists of high-confidence bivalent, H3K4me3-only and H3K27me3-only regions in hESC.** See Supplementary\_File\_S1.

**Supplementary File S2: Lists of high-confidence bivalent, H3K4me3-only and H3K27me3-only regions in hESC ready for uploading onto genome-browser.** See Supplementary\_File\_S2.

**Supplementary File S3: Gene ontology term enrichment of bivalent, H3K4me3-only and H3K27me3-only promoter regions** See Supplementary\_File\_S3.

**Supplementary File S4: Lists of high-confidence bivalent, H3K4me3-only and H3K27me3-only regions in hESC ready for uploading onto genome studio.** See Supplementary\_File\_S4.
