# Supplementary material for: An annotated list of bivalent chromatin regions in human ES cells: a new tool for cancer epigenetic research
Source: Oncotarget. 2016 Dec 1;8(3):4110–24. doi: 10.18632/oncotarget.13746 (PMC5354816; doi:10.18632/oncotarget.13746)
Supplement: Supplementary file 8 [file oncotarget-08-4110-s008.xlsx]

## Sheet: HC bivalent
chromosome	start	end	cluster	CpG_Island	GenePos	Gene	Fantom5_Enh	probes450K	TargetID_450K	probesEpic	TargetID_Epic
chr1	858272	862608	2	Yes	promoter	SAMD11	Yes	16	cg13856810,cg02663945,cg14324200,cg05527507,cg09166659,cg03180780,cg03735847,cg06091566,cg27487046,cg04672450,cg25215298,cg03725447,cg04839849,cg16352085,cg01980454,cg01197763	19	cg13856810,cg02663945,cg14324200,cg05527507,cg09166659,cg04531633,cg03180780,cg27009105,cg03735847,cg06091566,cg27487046,cg20341253,cg04672450,cg25215298,cg03725447,cg04839849,cg16352085,cg01789792,cg01197763
chr1	874357	878933	2	Yes	promoter	SAMD11	No	13	cg06838427,cg19724344,cg22416074,cg09988062,cg24045482,cg09180262,cg12454161,cg15896339,cg23112672,cg23440882,cg04121631,cg03269716,cg13904806	18	cg06838427,cg19724344,cg09988062,cg24045482,cg09180262,cg26477748,cg12454161,cg19669771,cg02676653,cg21801539,cg15896339,cg23112672,cg23440882,cg14183444,cg04121631,cg03269716,cg13904806,cg03521652
chr1	893903	897423	3	Yes	promoter	KLHL17,NOC2L	No	17	cg16968662,cg07582955,cg13802035,cg17505193,cg26866020,cg09789536,cg11132698,cg22114309,cg16993975,cg25096313,cg19923810,cg16389252,cg04485075,cg10207527,cg03161767,cg08472719,cg24664590	20	cg16968662,cg07582955,cg13802035,cg17505193,cg26866020,cg09789536,cg11132698,cg17368944,cg22114309,cg13713718,cg25096313,cg19923810,cg16389252,cg04485075,cg10207527,cg03161767,cg08472719,cg24664590,cg23430421,cg21362926
chr1	901243	902977	3	Yes	promoter	PLEKHN1	No	9	cg12536471,cg24076968,cg21832150,cg02056921,cg10375192,cg10110857,cg07390924,cg12663811,cg25742326	10	cg12536471,cg24076968,cg21832150,cg02056921,cg10375192,cg10110857,cg07390924,cg12663811,cg25742326,cg02835406
chr1	933276	937705	2	Yes	promoter	HES4,RP11-54O7.17	Yes	23	cg18977839,cg16578267,cg26321643,cg13468764,cg15825501,cg08122545,cg27060622,cg25066040,cg27430493,cg26339484,cg00447632,cg12257384,cg02397514,cg17907238,cg23205003,cg15578015,cg05095110,cg26224305,cg23552821,cg26003967,cg15713103,cg15882305,cg01729262	20	cg18977839,cg16578267,cg26321643,cg13468764,cg15825501,cg08122545,cg27060622,cg25066040,cg27430493,cg26339484,cg00447632,cg02397514,cg17907238,cg23205003,cg15578015,cg05095110,cg23552821,cg15713103,cg15882305,cg01729262
chr1	993728	996340	3	Yes	promoter	RP11-465B22.3	Yes	9	cg24678117,cg04919596,cg18172484,cg08459564,cg17098415,cg02482614,cg12647165,cg21607076,cg12184864	9	cg24678117,cg04919596,cg08459564,cg11308274,cg17098415,cg02482614,cg12647165,cg21607076,cg12184864
chr1	1286826	1291403	3	Yes	gene body	MXRA8	Yes	11	cg00040588,cg19436320,cg25063151,cg07284273,cg14793596,cg15386434,cg14270725,cg15472728,cg11414742,cg21118819,cg21679391	14	cg10482508,cg00040588,cg19436320,cg25063151,cg07284273,cg14793596,cg16006120,cg15386434,cg14270725,cg15472728,cg11414742,cg03722312,cg21118819,cg21679391
chr1	1534054	1536662	3	Yes	promoter	C1orf233	No	6	cg09172260,cg11521998,cg08289140,cg16358446,cg09126090,cg07479014	7	cg15158067,cg09172260,cg11521998,cg08289140,cg16358446,cg09126090,cg07479014
chr1	1565579	1567978	3	Yes	promoter	MMP23B	No	10	cg11798909,cg03136646,cg26740494,cg11648594,cg06943420,cg08231710,cg00262621,cg24535439,cg04882394,cg24368383	12	cg11798909,cg05419999,cg26976576,cg05834878,cg26740494,cg11648594,cg06943420,cg08231710,cg00262621,cg24535439,cg04882394,cg24368383
chr1	1949732	1951776	3	Yes	promoter	GABRD	Yes	8	cg06063714,cg18392644,cg00580652,cg11808581,cg09107007,cg22817993,cg24087944,cg17854471	10	cg06063714,cg18392644,cg00580652,cg05333723,cg11808581,cg09107007,cg22817993,cg24087944,cg27059105,cg17854471
chr1	2460030	2462404	3	Yes	promoter	HES5	No	12	cg05697909,cg15923947,cg06839900,cg01116067,cg17755964,cg09827752,cg20430847,cg12053769,cg01985965,cg07836831,cg06231244,cg02483661	14	cg05697909,cg15923947,cg06839900,cg18040786,cg01116067,cg17755964,cg09827752,cg20430847,cg10005581,cg12053769,cg01985965,cg07836831,cg06231244,cg02483661
chr1	2978531	2981141	2	Yes	promoter	LINC00982	No	10	cg04204526,cg05346286,cg03969902,cg12050271,cg01514538,cg04484550,cg27197651,cg09074856,cg07523753,cg23969554	8	cg04204526,cg12050271,cg01514538,cg04484550,cg27197651,cg09074856,cg07523753,cg23969554
chr1	2983666	2988162	2	Yes	promoter	LINC00982,PRDM16	No	28	cg18509466,cg22122862,cg18381051,cg07534194,cg17239558,cg12267948,cg13744917,cg15390554,cg08537652,cg08541612,cg25152368,cg07348009,cg04080595,cg26938364,cg17173498,cg19356825,cg08528984,cg00945293,cg04241652,cg05303132,cg01908338,cg07363855,cg11229543,cg12140144,cg10802480,cg07946633,cg06991974,cg03256938	27	cg18509466,cg22122862,cg18381051,cg07534194,cg17239558,cg12267948,cg13744917,cg15390554,cg08537652,cg14428543,cg08541612,cg25152368,cg07348009,cg17173498,cg19356825,cg08528984,cg05288547,cg19478129,cg21467989,cg04241652,cg01908338,cg07363855,cg11229543,cg12140144,cg07946633,cg06991974,cg03256938
chr1	2989380	2991196	2	Yes	gene body	PRDM16	Yes	4	cg22726349,cg17001566,cg04852443,cg26762347	4	cg22726349,cg17001566,cg04852443,cg26762347
chr1	3309369	3311291	2	Yes	gene body	PRDM16	Yes	5	cg01783650,cg22388607,cg02390319,cg26846424,cg20671649	4	cg01783650,cg02390319,cg26846424,cg20671649
chr1	3526414	3528193	3	Yes	promoter	MEGF6	No	6	cg21830313,cg22783358,cg16033941,cg15154191,cg10013316,cg01488300	9	cg14929635,cg09601544,cg10663666,cg21830313,cg22783358,cg16033941,cg15154191,cg10013316,cg01488300
chr1	3565329	3570404	2	Yes	promoter	TP73,WRAP73	No	49	cg11504517,cg05924583,cg16741710,cg19783114,cg02153614,cg16406833,cg07901143,cg24336278,cg11729413,cg25885108,cg17496659,cg01915516,cg00295572,cg00565688,cg20677901,cg10143426,cg14781922,cg04391111,cg24073122,cg20611911,cg01434649,cg12475507,cg25731359,cg24678611,cg10038618,cg07382920,cg26128092,cg16823083,cg21000072,cg04021697,cg19135761,cg22614891,cg18021902,cg21012455,cg04865841,cg11256802,cg2…	46	cg11504517,cg05924583,cg16741710,cg19783114,cg10654015,cg02153614,cg16406833,cg07901143,cg24336278,cg25885108,cg17496659,cg01915516,cg00295572,cg00565688,cg20677901,cg10143426,cg04391111,cg24073122,cg01434649,cg12475507,cg25731359,cg24678611,cg10038618,cg07382920,cg26128092,cg16823083,cg21000072,cg04021697,cg22614891,cg18021902,cg21012455,cg04865841,cg11256802,cg22822803,cg04344205,cg17801268,cg0…
chr1	4712592	4719972	3	Yes	promoter	AJAP1	No	20	cg22367872,cg12058478,cg26599630,cg14218042,cg24019371,cg02483484,cg15198793,cg12665669,cg08159291,cg17525406,cg04027805,cg09175749,cg16563230,cg11835068,cg12475759,cg17741689,cg15484532,cg13495205,cg20959866,cg17328472	19	cg22367872,cg12058478,cg26599630,cg24019371,cg02483484,cg08159291,cg17525406,cg04027805,cg09175749,cg16563230,cg01982088,cg10146268,cg11835068,cg12475759,cg17741689,cg15484532,cg13495205,cg20959866,cg17328472
chr1	6053054	6054601	3	No	promoter	KCNAB2,NPHP4	Yes	2	cg02064300,cg10224655	2	cg01096738,cg10224655
chr1	6208211	6209648	3	Yes	gene body	CHD5	No	5	cg10537555,cg17831269,cg12276513,cg04898695,cg15991503	5	cg10537555,cg17831269,cg12276513,cg04898695,cg15991503
chr1	6238672	6241806	3	Yes	promoter	CHD5	No	13	cg00532411,cg17175208,cg11726911,cg00282347,cg08706545,cg14995214,cg24151926,cg22902824,cg17724171,cg16519705,cg08080029,cg13851144,cg15578645	12	cg00532411,cg17175208,cg11726911,cg00282347,cg08706545,cg14995214,cg24151926,cg15772669,cg16519705,cg08080029,cg13851144,cg15578645
chr1	6264917	6267508	3	Yes	promoter	RNF207,RP1-120G22.11	No	13	cg27307298,cg11764177,cg08611163,cg06147379,cg16094412,cg17515966,cg12911256,cg24870568,cg03716999,cg03734402,cg15584788,cg19180828,cg21211271	16	cg27307298,cg11764177,cg08611163,cg10907062,cg06147379,cg17579113,cg16094412,cg09526205,cg17515966,cg12911256,cg24870568,cg03716999,cg03734402,cg15584788,cg19180828,cg21211271
chr1	6268392	6270383	3	Yes	gene body	RNF207	No	7	cg16359901,cg25286333,cg01373911,cg15731815,cg18235937,cg00030047,cg21210232	7	cg16359901,cg25286333,cg01373911,cg15731815,cg18235937,cg00030047,cg21210232
chr1	6298711	6307502	3	Yes	promoter	HES3,LINC00337	Yes	25	cg10778407,cg02041944,cg05797463,cg11554771,cg17491697,cg26257210,cg26912877,cg03327263,cg10829621,cg04992704,cg22699074,cg19743103,cg20157525,cg00765655,cg18564053,cg00769305,cg24463605,cg24539779,cg07605241,cg22733648,cg05347736,cg01514415,cg00883218,cg23164855,cg21413219	26	cg10778407,cg02041944,cg05797463,cg11554771,cg17491697,cg26257210,cg03327263,cg10829621,cg04992704,cg19743103,cg20157525,cg00765655,cg18564053,cg12723684,cg02994773,cg00769305,cg24463605,cg24539779,cg07605241,cg22733648,cg05347736,cg23341202,cg01514415,cg00883218,cg23164855,cg21413219
chr1	6478433	6481173	2	Yes	promoter	HES2	No	15	cg25352592,cg00644814,cg01501312,cg24864511,cg03186004,cg00549463,cg03476000,cg23040649,cg17826013,cg19195327,cg23603891,cg14832908,cg04691277,cg17447502,cg07104732	12	cg25352592,cg01501312,cg03186004,cg03476000,cg23040649,cg17826013,cg19195327,cg23603891,cg14832908,cg04691277,cg17447502,cg07104732
chr1	6483359	6485739	2	Yes	promoter	ESPN,HES2	No	10	cg13066963,cg24153044,cg03397716,cg00297432,cg27307523,cg09549827,cg22227104,cg19253827,cg15718222,cg03518417	12	cg13066963,cg24153044,cg27091900,cg18953405,cg24017268,cg00297432,cg27307523,cg09549827,cg22227104,cg19253827,cg15718222,cg03518417
chr1	6499894	6501659	3	Yes	gene body	ESPN	No	6	cg24050109,cg04871364,cg24470693,cg26815404,cg17430636,cg26603264	7	cg09622318,cg24050109,cg04871364,cg24470693,cg26815404,cg17430636,cg26603264
chr1	6506525	6509864	3	Yes	promoter	ESPN,RP1-202O8.2	No	9	cg13326801,cg25097074,cg15274864,cg06189708,cg19809453,cg20248421,cg23919534,cg05068146,cg16414143	12	cg13326801,cg02442854,cg25399512,cg15274864,cg19809453,cg20248421,cg23919534,cg05068146,cg16414143,cg22618905,cg16365077,cg03381717
chr1	6555559	6558300	3	Yes	promoter	PLEKHG5	No	9	cg07181374,cg22451657,cg24332389,cg03778981,cg18810133,cg01514859,cg19919506,cg21453303,cg01429933	14	cg07181374,cg22451657,cg24332389,cg03778981,cg18810133,cg01514859,cg24542908,cg02661172,cg08444092,cg22483939,cg21453303,cg03236969,cg12533539,cg01429933
chr1	7739584	7741628	1	Yes	gene body	CAMTA1	No	10	cg25763306,cg15642534,cg14278614,cg24294989,cg11535529,cg22364869,cg11166348,cg24778130,cg17875988,cg20972269	10	cg25763306,cg15642534,cg14278614,cg24294989,cg11535529,cg22364869,cg11166348,cg24778130,cg17875988,cg20972269
chr1	7761916	7764244	3	No	promoter	RP11-338N10.3	No	4	cg22488970,cg04914013,cg00067518,cg23937295	3	cg04914013,cg00067518,cg23937295
chr1	8377551	8379170	3	Yes	promoter	SLC45A1	No	8	cg14851757,cg09216375,cg04609307,cg26316082,cg12907988,cg07171527,cg00341060,cg26407930	8	cg14851757,cg09216375,cg04609307,cg26316082,cg16409707,cg12907988,cg07171527,cg26407930
chr1	9187607	9189340	3	Yes	promoter	GPR157	No	9	cg18131499,cg18040436,cg12271223,cg27178407,cg12132894,cg06374766,cg17940013,cg03583311,cg25003147	11	cg18131499,cg18040436,cg12271223,cg27178407,cg12132894,cg00713252,cg13228810,cg06374766,cg17940013,cg03583311,cg25003147
chr1	9240996	9244525	1	Yes	promoter	RP3-510D11.2	Yes	9	cg12385729,cg24167422,cg02924110,cg06658816,cg03521358,cg04112567,cg04413644,cg08736918,cg05814135	12	cg12385729,cg24167422,cg02924110,cg06658816,cg03521358,cg04112567,cg04413644,cg09312740,cg25368261,cg16313966,cg08736918,cg05814135
chr1	9260970	9263309	3	No	promoter	RP3-510D11.1	Yes	1	cg16097191	4	cg08295452,cg18882343,cg18264158,cg16097191
chr1	9353130	9355486	3	No	promoter	SPSB1	No	5	cg06899522,cg26352795,cg02447606,cg12458866,cg13724813	5	cg06899522,cg26352795,cg19373778,cg02447606,cg12458866
chr1	9710973	9713526	3	Yes	promoter	PIK3CD	No	12	cg18284427,cg07793148,cg10050900,cg01666040,cg18976437,cg17325959,cg26573321,cg16895792,cg22045271,cg07374121,cg20994801,cg12763118	13	cg07793148,cg10050900,cg01666040,cg18976437,cg17325959,cg26573321,cg16895792,cg22045271,cg07374121,cg27144528,cg20994801,cg20880254,cg12763118
chr1	9746653	9749491	3	Yes	promoter	PIK3CD,RP11-558F24.4	No	5	cg07427436,cg03265564,cg11980800,cg03653801,cg19309580	7	cg07427436,cg03265564,cg08201721,cg11980800,cg13297177,cg18244129,cg03653801
chr1	9749940	9751678	3	Yes	gene body	PIK3CD	No	4	cg16125214,cg20681184,cg24859236,cg23251761	4	cg16125214,cg20681184,cg24859236,cg23251761
chr1	9884215	9886356	3	Yes	promoter	CLSTN1	Yes	12	cg00941241,cg00559234,cg07035320,cg24691879,cg00123104,cg19858017,cg23616100,cg26985289,cg24551579,cg24044762,cg27399414,cg01800926	12	cg00559234,cg07035320,cg24691879,cg09478648,cg00123104,cg19858017,cg23616100,cg26985289,cg24551579,cg24044762,cg27399414,cg01800926
chr1	10056386	10058587	3	Yes	promoter	RBP7	Yes	14	cg07224455,cg15090005,cg08806699,cg16050974,cg27561954,cg25397076,cg23107691,cg03994053,cg18086187,cg27083689,cg03406535,cg20413202,cg14202757,cg10796749	16	cg07224455,cg15090005,cg08806699,cg16050974,cg27561954,cg25397076,cg23107691,cg04694430,cg03994053,cg18086187,cg27083689,cg03406535,cg20413202,cg14202757,cg00681705,cg10796749
chr1	10709017	10712096	3	No	gene body	CASZ1,RP4-734G22.3	No	10	cg15597109,cg01968133,cg10816626,cg27170141,cg19370715,cg22508928,cg09415955,cg19706390,cg18878351,cg16346321	11	cg15597109,cg01968133,cg10816626,cg27025731,cg27170141,cg19370715,cg22508928,cg09415955,cg19706390,cg18878351,cg16346321
chr1	10763792	10765421	3	Yes	gene body	CASZ1	No	4	cg04149978,cg17158913,cg07589381,cg14835956	3	cg04149978,cg17158913,cg07589381
chr1	10852942	10857406	2	Yes	promoter	CASZ1	Yes	20	cg00787856,cg13057174,cg24298421,cg12275723,cg16523380,cg17944110,cg05742354,cg23723903,cg13840194,cg14865393,cg24102726,cg12035827,cg23901904,cg08655893,cg26839728,cg08945452,cg10491460,cg16238819,cg08108188,cg22800477	19	cg00787856,cg13057174,cg24298421,cg16523380,cg17944110,cg05742354,cg13840194,cg14865393,cg24102726,cg12035827,cg23901904,cg08655893,cg26839728,cg08945452,cg10491460,cg16238819,cg08108188,cg22800477,cg19178679
chr1	10925715	10927866	3	No	intergenic	NA	Yes	3	cg20253574,cg17903627,cg08006333	2	cg17903627,cg08006333
chr1	11538898	11541270	1	Yes	promoter	PTCHD2	No	6	cg12808447,cg05379302,cg01368812,cg20692414,cg09018444,cg15658487	11	cg12808447,cg05379302,cg01368812,cg20692414,cg09018444,cg07040018,cg15658487,cg22567621,cg08101962,cg07328246,cg19044458
chr1	11712798	11714573	3	Yes	promoter	FBXO2,FBXO44	No	10	cg00953777,cg07426195,cg01420388,cg22697136,cg05796704,cg26829322,cg19747992,cg06848073,cg22450927,cg15746187	11	cg07426195,cg25752723,cg16077279,cg21515751,cg01420388,cg22697136,cg05796704,cg19747992,cg06848073,cg22450927,cg15746187
chr1	12122826	12125299	3	Yes	promoter	TNFRSF8	Yes	11	cg05036439,cg07731304,cg16305333,cg04506109,cg07166679,cg05121790,cg17897879,cg01966612,cg00653960,cg14834850,cg19896198	14	cg05036439,cg23322439,cg07731304,cg16305333,cg04506109,cg07166679,cg05121790,cg01237531,cg00653960,cg14834850,cg19896198,cg03160603,cg15957684,cg08200207
chr1	12226536	12228133	3	Yes	promoter	TNFRSF1B	Yes	9	cg09557991,cg00155063,cg26189983,cg22337605,cg24682307,cg08844894,cg24635257,cg15819646,cg13836770	10	cg09557991,cg26189983,cg22337605,cg24682307,cg12002159,cg08844894,cg24635257,cg18833720,cg15819646,cg13836770
chr1	13838798	13841112	3	Yes	promoter	LRRC38,RP4-597A16.2	No	11	cg22225207,cg01144933,cg26536189,cg23071120,cg12937438,cg23974336,cg13788258,cg09936426,cg11178863,cg04974913,cg24594454	16	cg12414759,cg22225207,cg24564998,cg26536189,cg23071120,cg12937438,cg23974336,cg13788258,cg22409701,cg09936426,cg11178863,cg04974913,cg10003761,cg26915665,cg24594454,cg23084526
chr1	14025746	14028384	1	Yes	promoter	PRDM2	Yes	16	cg26608693,cg16680547,cg24550112,cg01816014,cg13634713,cg24593694,cg09826587,cg07596209,cg09765994,cg05346841,cg00922376,cg23813012,cg11344626,cg02330214,cg19300923,cg20464068	18	cg27580568,cg26608693,cg16680547,cg24550112,cg01816014,cg13634713,cg09826587,cg07596209,cg09765994,cg05346841,cg18555909,cg00922376,cg23813012,cg11344626,cg00400591,cg02330214,cg19300923,cg20464068
chr1	14218553	14220636	3	Yes	intergenic	NA	No	8	cg19621427,cg08482465,cg02887997,cg14615440,cg03580831,cg22781249,cg23693169,cg18081498	12	cg19621427,cg08482465,cg02887997,cg14615440,cg02042384,cg03580831,cg22781249,cg23693169,cg18081498,cg14269708,cg09759386,cg11053137
chr1	14925186	14929380	3	Yes	promoter	KAZN	Yes	9	cg08538034,cg22507756,cg02927252,cg04996873,cg00185566,cg03391684,cg05006349,cg10228777,cg25104105	10	cg08538034,cg22507756,cg01650295,cg02927252,cg04996873,cg00185566,cg03391684,cg05006349,cg10228777,cg25104105
chr1	15249660	15252679	3	Yes	promoter	KAZN	No	9	cg00809863,cg23361368,cg11141156,cg09820321,cg21833837,cg02835848,cg09094328,cg23280013,cg20958628	8	cg00809863,cg23361368,cg11141156,cg09820321,cg21833837,cg02835848,cg09094328,cg23280013
chr1	15477596	15482075	3	Yes	promoter	TMEM51,TMEM51-AS1	No	25	cg07180646,cg10758286,cg24835051,cg05385377,cg15319451,cg25025297,cg00188746,cg17725211,cg17277729,cg16858898,cg06208989,cg25908635,cg00772714,cg20811856,cg10132838,cg13081644,cg25975626,cg17015937,cg24535573,cg20375690,cg24349832,cg22453656,cg10989683,cg02772951,cg20746795	26	cg10282904,cg07180646,cg24835051,cg05385377,cg15319451,cg25025297,cg00188746,cg17725211,cg17277729,cg16858898,cg06208989,cg25908635,cg00772714,cg20811856,cg10132838,cg11461111,cg13081644,cg25975626,cg17015937,cg24535573,cg20375690,cg24349832,cg22453656,cg10989683,cg02772951,cg21331060
chr1	15710200	15713377	3	No	gene body	FHAD1	No	2	cg11395890,cg00970752	3	cg11395890,cg00970752,cg05507805
chr1	15735094	15738859	3	Yes	promoter	EFHD2,RP3-467K16.4	Yes	11	cg25978218,cg24070543,cg25741794,cg15650240,cg25215654,cg06408550,cg23598254,cg17355239,cg15026696,cg22269795,cg02774015	14	cg23945334,cg25978218,cg24070543,cg25741794,cg24128364,cg15650240,cg25215654,cg15290708,cg06408550,cg23598254,cg17355239,cg15026696,cg22269795,cg03660835
chr1	16399210	16401286	3	Yes	promoter	FAM131C	No	10	cg22852013,cg03466522,cg25851313,cg17944189,cg10536101,cg07311565,cg10798048,cg03745244,cg21189909,cg20326928	9	cg22852013,cg03466522,cg25851313,cg17944189,cg10536101,cg10798048,cg03745244,cg21189909,cg20326928
chr1	16542322	16544723	3	Yes	promoter	ANO7P1	No	7	cg17465616,cg10454529,cg02287573,cg03735492,cg14577366,cg11570511,cg00662782	9	cg17465616,cg10454529,cg02287573,cg19054818,cg09342184,cg03735492,cg21945734,cg14577366,cg00662782
chr1	16552529	16555557	3	Yes	promoter	C1orf134	Yes	10	cg11211795,cg07781491,cg16312002,cg17463745,cg20611680,cg16680438,cg02987928,cg03522107,cg14429204,cg03969515	10	cg11211795,cg07781491,cg16312002,cg17463745,cg20611680,cg16680438,cg02987928,cg03522107,cg14429204,cg03969515
chr1	16858110	16863780	2	Yes	promoter	U1	No	14	cg05334554,cg16373765,cg21680896,cg22218470,cg14928320,cg18024113,cg12918271,cg06438517,cg19626158,cg10969209,cg24725360,cg27568983,cg24938077,cg23913123	19	cg05334554,cg16373765,cg21680896,cg22218470,cg14928320,cg18024113,cg02871102,cg12918271,cg27552113,cg06438517,cg20848377,cg19626158,cg15928730,cg07331004,cg14553527,cg24725360,cg27568983,cg24938077,cg23913123
chr1	16938169	16941735	1	Yes	promoter	NBPF1	No	12	cg26789489,cg08135460,cg02026604,cg19627864,cg04237804,cg03649238,cg26809482,cg01943843,cg16116244,cg09507771,cg01599189,cg13384150	13	cg08135460,cg27165252,cg02026604,cg14465946,cg19627864,cg05326195,cg04237804,cg03649238,cg26809482,cg01943843,cg09507771,cg01599189,cg13384150
chr1	16973164	16975457	1	Yes	intergenic	NA	No	6	cg04206025,cg01055135,cg14237550,cg17455847,cg13171718,cg06599927	5	cg01055135,cg14237550,cg17455847,cg13171718,cg06599927
chr1	17018735	17021551	2	Yes	gene body	ESPNP	Yes	7	cg01395667,cg21460394,cg15629460,cg01260170,cg27525446,cg07311615,cg04850659	11	cg01395667,cg18932417,cg21460394,cg15629460,cg01260170,cg27525446,cg07311615,cg04850659,cg11782634,cg02790620,cg23986148
chr1	17024732	17028875	2	Yes	gene body	ESPNP	Yes	10	cg05208572,cg05740418,cg19809791,cg02022339,cg17798614,cg16749570,cg23636032,cg17670191,cg24875017,cg06094126	8	cg05208572,cg05740418,cg19809791,cg02022339,cg17798614,cg17670191,cg24875017,cg06094126
chr1	17033021	17035480	3	Yes	gene body	ESPNP	No	6	cg10335333,cg26624031,cg17210929,cg27544000,cg04801974,cg02976036	6	cg10335333,cg26624031,cg17210929,cg27544000,cg04801974,cg02976036
chr1	17197205	17202614	2	Yes	promoter	U1	No	13	cg12647302,cg10011855,cg11334694,cg24280512,cg21692666,cg20168927,cg08736522,cg25976453,cg13178798,cg07564869,cg06988967,cg09861838,cg04494270	17	cg12647302,cg10011855,cg27528541,cg11334694,cg24280512,cg21692666,cg20168927,cg08736522,cg12483946,cg23989737,cg25976453,cg13178798,cg07564869,cg09861838,cg04494270,cg08973243,cg08723103
chr1	17444326	17447016	3	Yes	promoter	PADI2	No	11	cg18879300,cg00569276,cg10233913,cg15185794,cg17183414,cg18228326,cg09313801,cg19282714,cg01603374,cg07014827,cg03601920	14	cg18879300,cg00569276,cg25960632,cg10233913,cg09431198,cg16462011,cg15185794,cg17183414,cg18228326,cg09313801,cg19282714,cg01603374,cg07014827,cg03601920
chr1	17766124	17768768	3	No	promoter	RCC2	Yes	13	cg04794690,cg01713950,cg23913963,cg25607239,cg22031887,cg03227570,cg13947949,cg24559601,cg11850961,cg00992659,cg21243909,cg20465008,cg16032384	12	cg04794690,cg10582712,cg23913963,cg25607239,cg22031887,cg03227570,cg13947949,cg11850961,cg00992659,cg21243909,cg20465008,cg16032384
chr1	18433011	18438611	3	Yes	promoter	IGSF21	No	19	cg24690231,cg27114640,cg01962676,cg11767181,cg25597894,cg19585156,cg14860499,cg17211582,cg04128045,cg22333960,cg08844966,cg08244959,cg23349790,cg21578219,cg17945001,cg03993263,cg08005774,cg17217879,cg11232944	20	cg24690231,cg01962676,cg11767181,cg25597894,cg19585156,cg14860499,cg17211582,cg04128045,cg22333960,cg08844966,cg08244959,cg23349790,cg21578219,cg17945001,cg03993263,cg08005774,cg20844821,cg17217879,cg11232944,cg09390181
chr1	18955758	18960789	2	Yes	promoter	PAX7	No	22	cg15505287,cg14840612,cg08549396,cg16405019,cg09670535,cg00855990,cg00065215,cg12601945,cg07398105,cg26433368,cg22341256,cg09975867,cg13969001,cg11428724,cg21170920,cg26661034,cg17172851,cg07536847,cg08235970,cg05052324,cg25020286,cg04129469	22	cg15505287,cg14840612,cg08549396,cg16405019,cg09670535,cg00855990,cg00065215,cg12601945,cg07398105,cg26433368,cg22341256,cg09975867,cg13969001,cg12963084,cg11428724,cg09496876,cg26661034,cg17172851,cg08235970,cg05052324,cg25020286,cg04129469
chr1	18962161	18964806	2	Yes	gene body	PAX7	No	8	cg06220449,cg02178648,cg04126266,cg13207345,cg08126203,cg09366342,cg15213210,cg08129914	8	cg06220449,cg02178648,cg04126266,cg13207345,cg08126203,cg09366342,cg15213210,cg08129914
chr1	18966288	18968579	2	Yes	gene body	PAX7	No	6	cg11218625,cg25769417,cg06178299,cg24379252,cg08164371,cg18217175	7	cg19197948,cg15992107,cg11218625,cg06178299,cg24379252,cg08164371,cg18217175
chr1	19042688	19044377	3	Yes	gene body	PAX7	No	3	cg08350288,cg00794881,cg15082028	3	cg08350288,cg00794881,cg15082028
chr1	19969507	19972768	2	Yes	promoter	NBL1	No	13	cg00932104,cg00755546,cg18923740,cg03884082,cg23295592,cg10555159,cg00023492,cg09860653,cg03048314,cg16650717,cg07147364,cg21057046,cg21813747	25	cg00932104,cg12474394,cg14579430,cg10211745,cg19234140,cg15589641,cg18923740,cg03884082,cg10555159,cg09860653,cg05481086,cg20141851,cg20890713,cg03048314,cg16650717,cg07147364,cg21057046,cg10923719,cg17124647,cg22767145,cg04604347,cg14699309,cg21813747,cg09309058,cg15317859
chr1	19990690	19992987	3	Yes	promoter	HTR6	No	12	cg06033660,cg00365524,cg22059812,cg18023598,cg27549720,cg10741760,cg11247289,cg01468656,cg03321592,cg22614355,cg04607131,cg09863950	14	cg06033660,cg00365524,cg22059812,cg18023598,cg27549720,cg10741760,cg11247289,cg01468656,cg03321592,cg22614355,cg03669374,cg22416183,cg04607131,cg09863950
chr1	20125640	20127254	3	Yes	promoter	TMCO4	No	11	cg21615127,cg26886978,cg01911060,cg06362348,cg04338022,cg09133562,cg00966591,cg01077102,cg12271781,cg19976467,cg09138671	13	cg21615127,cg26886978,cg01911060,cg06362348,cg04338022,cg09133562,cg00966591,cg01077102,cg12271781,cg19976467,cg20733068,cg22053084,cg09138671
chr1	20511377	20513938	3	Yes	promoter	RP3-340N1.5,UBXN10	No	9	cg11651220,cg24479524,cg06911113,cg24685601,cg19696441,cg03167763,cg08130175,cg06090867,cg07792006	18	cg22805515,cg26599122,cg01377128,cg14575648,cg08862735,cg25826297,cg11651220,cg24479524,cg06911113,cg24685601,cg19696441,cg18722282,cg03167763,cg25227846,cg08130175,cg21954572,cg06090867,cg07792006
chr1	20616696	20618837	3	No	promoter	VWA5B1	No	7	cg06377106,cg04637372,cg25745746,cg05805297,cg02195657,cg00433406,cg13463492	9	cg06377106,cg04637372,cg25745746,cg15249349,cg20498456,cg08490859,cg05805297,cg02195657,cg13463492
chr1	20692154	20694238	3	Yes	gene body	RP4-749H3.1	Yes	8	cg13904704,cg07596568,cg20283477,cg17331494,cg26831566,cg01084154,cg16023415,cg04722511	8	cg13904704,cg07596568,cg20283477,cg17331494,cg26831566,cg01084154,cg16023415,cg04722511
chr1	20809766	20814454	3	Yes	promoter	CAMK2N1	No	18	cg05301811,cg09473576,cg11526866,cg22942704,cg00447682,cg24294857,cg19283960,cg08061330,cg13401911,cg00980178,cg08398233,cg22214335,cg08898653,cg14992232,cg16814796,cg07091412,cg02941008,cg16730824	13	cg05301811,cg09473576,cg11526866,cg22942704,cg00447682,cg08061330,cg13401911,cg22214335,cg08898653,cg02607227,cg07091412,cg02941008,cg16730824
chr1	20877499	20881248	2	Yes	promoter	FAM43B	No	18	cg00527174,cg23993425,cg04850423,cg17543296,cg02582387,cg06393286,cg12768681,cg20404387,cg05771261,cg03754311,cg09511914,cg19507093,cg26557658,cg15142222,cg04309384,cg04241844,cg10778636,cg07813254	17	cg00527174,cg04850423,cg17543296,cg02582387,cg06393286,cg12768681,cg20404387,cg05771261,cg03754311,cg19507093,cg26557658,cg15142222,cg15742063,cg04309384,cg04241844,cg10778636,cg07813254
chr1	21043000	21045141	3	Yes	promoter	KIF17	No	12	cg05129477,cg18486150,cg05356564,cg22527425,cg01054622,cg23677039,cg02097443,cg04123845,cg21184320,cg08890418,cg09793172,cg15613048	11	cg05129477,cg18486150,cg05356564,cg01054622,cg01694590,cg23677039,cg24661871,cg27137902,cg04123845,cg21184320,cg15613048
chr1	21056174	21060395	3	Yes	promoter	RP5-930J4.2,SH2D5	No	17	cg01774477,cg04923513,cg16172837,cg12908894,cg07717763,cg20567404,cg01010870,cg25277868,cg22599563,cg20794273,cg05704196,cg26840598,cg03472655,cg04902671,cg23841903,cg18864674,cg00259367	19	cg01774477,cg04923513,cg16172837,cg12908894,cg16455037,cg07717763,cg20567404,cg25277868,cg22599563,cg20794273,cg05704196,cg26840598,cg03472655,cg04902671,cg23841903,cg15835657,cg18864674,cg02768353,cg00259367
chr1	21669565	21672042	3	Yes	promoter	ECE1	Yes	6	cg05364829,cg00960509,cg23288818,cg16829306,cg15462862,cg00228796	6	cg05364829,cg00960509,cg23288818,cg16829306,cg15462862,cg00228796
chr1	21947930	21949697	3	Yes	promoter	RAP1GAP	No	4	cg24001246,cg00631482,cg21694350,cg01424901	5	cg24001246,cg27662167,cg00631482,cg21694350,cg01424901
chr1	21977328	21979395	3	Yes	promoter	RAP1GAP	No	5	cg14515812,cg01723876,cg08892236,cg18150885,cg04142080	6	cg13723490,cg14515812,cg01723876,cg08892236,cg18150885,cg04142080
chr1	21994468	21997141	3	Yes	promoter	RAP1GAP	No	9	cg17184245,cg15601228,cg07138512,cg18438124,cg10497692,cg01360093,cg13950625,cg17437399,cg22396755	9	cg17184245,cg15601228,cg07138512,cg18438124,cg10497692,cg01360093,cg13950625,cg17437399,cg22396755
chr1	22467320	22469477	3	Yes	promoter	WNT4	Yes	3	cg20792512,cg08504468,cg03133269	4	cg05667540,cg20792512,cg08504468,cg03133269
chr1	22889158	22891236	3	Yes	promoter	EPHA8	No	6	cg18232871,cg13437164,cg10838091,cg11801107,cg11847808,cg02484391	4	cg13437164,cg11801107,cg11847808,cg02484391
chr1	23503537	23505235	3	Yes	promoter	LUZP1	No	7	cg24437797,cg18660064,cg01820314,cg11684496,cg06322891,cg19301934,cg08912155	8	cg24437797,cg18660064,cg01820314,cg17159549,cg11684496,cg06322891,cg08912155,cg03637901
chr1	23542073	23545181	3	Yes	intergenic	NA	Yes	4	cg19743168,cg06974961,cg15010184,cg26360612	4	cg19743168,cg06974961,cg26360612,cg05867565
chr1	23693709	23699491	3	Yes	promoter	C1orf213,Y_RNA,ZNF436	No	23	cg05392323,cg20150640,cg22502492,cg16696234,cg16240683,cg15598244,cg16727538,cg24038158,cg05139070,cg20959676,cg05783676,cg07155211,cg00269115,cg20275932,cg24314279,cg18273566,cg17452713,cg10984183,cg20941554,cg02454131,cg16272777,cg18167329,cg10347418	29	cg03562766,cg05392323,cg20150640,cg22502492,cg26999579,cg16696234,cg16240683,cg24818486,cg27058404,cg15598244,cg15957747,cg16727538,cg24038158,cg05139070,cg04765141,cg20959676,cg25204607,cg19352059,cg07155211,cg00269115,cg07085324,cg21338642,cg24314279,cg18273566,cg17452713,cg10984183,cg20941554,cg02454131,cg10347418
chr1	23749575	23752216	2	Yes	promoter	TCEA3	No	12	cg12023170,cg06033387,cg07820742,cg12692722,cg26299174,cg24451422,cg06177627,cg09896346,cg07736389,cg07356011,cg12621203,cg00463859	15	cg15040770,cg12023170,cg06033387,cg07820742,cg18474038,cg12692722,cg26299174,cg17323828,cg24451422,cg06177627,cg09896346,cg07736389,cg07356011,cg12621203,cg00463859
chr1	23855776	23858711	1	Yes	promoter	E2F2	No	11	cg24254937,cg21211748,cg22040403,cg03333582,cg06419270,cg02992252,cg12796015,cg11798959,cg13398782,cg00914562,cg23574449	12	cg24254937,cg21202847,cg21211748,cg22040403,cg03333582,cg06419270,cg10926222,cg02992252,cg12796015,cg11798959,cg13398782,cg23574449
chr1	23882772	23885933	1	Yes	promoter	ID3	Yes	8	cg20811145,cg03535461,cg07034850,cg09318066,cg25287482,cg02343604,cg15357156,cg13977835	7	cg20811145,cg03535461,cg09318066,cg25287482,cg02343604,cg15357156,cg13977835
chr1	23945386	23947090	3	Yes	gene body	MDS2	No	5	cg25141417,cg25102375,cg06925975,cg00944142,cg16685586	6	cg06551785,cg25141417,cg25102375,cg06925975,cg00944142,cg16685586
chr1	24163872	24165672	3	No	promoter	HMGCL	No	2	cg15997130,cg05791411	4	cg09428157,cg10205764,cg15997130,cg05791411
chr1	24193547	24195924	3	Yes	promoter	FUCA1	No	18	cg04160030,cg22614927,cg10953003,cg22077361,cg21528040,cg24792360,cg15692032,cg19367136,cg10051214,cg05560725,cg12084952,cg07568418,cg20694461,cg25973374,cg08366126,cg11415975,cg01925393,cg26873754	19	cg04160030,cg22614927,cg10953003,cg22077361,cg21528040,cg24792360,cg15692032,cg19367136,cg10051214,cg05560725,cg12084952,cg07568418,cg12626384,cg20694461,cg25973374,cg08366126,cg11415975,cg01925393,cg26873754
chr1	24228665	24230740	3	Yes	gene body	CNR2	Yes	7	cg23287243,cg07967717,cg03611151,cg26404511,cg24452347,cg19276111,cg20297631	8	cg23287243,cg16873748,cg03611151,cg26404511,cg24452347,cg19276111,cg04372863,cg20297631
chr1	24645284	24650222	3	Yes	promoter	GRHL3,RP11-10N16.3	No	22	cg13987674,cg11709405,cg05036846,cg22176324,cg14616251,cg21273275,cg06376426,cg02984188,cg01119512,cg16155382,cg19697558,cg14167629,cg23820945,cg26365938,cg04552500,cg21289280,cg20242797,cg15050111,cg09662754,cg12757705,cg24860886,cg27298252	29	cg13987674,cg08774410,cg08223291,cg11709405,cg25083792,cg05036846,cg22176324,cg14616251,cg10337902,cg01590970,cg01231985,cg21273275,cg06376426,cg02984188,cg01119512,cg16155382,cg19697558,cg14167629,cg23820945,cg26365938,cg04552500,cg21289280,cg20242797,cg15050111,cg09662754,cg12757705,cg01595062,cg24860886,cg27298252
chr1	24881562	24883470	3	No	promoter	NCMAP,RP4-594I10.3	No	7	cg20433521,cg17971531,cg03684513,cg11952735,cg20263885,cg04095045,cg21859019	11	cg20433521,cg17971531,cg27146077,cg03684513,cg09568594,cg21531925,cg11952735,cg20263885,cg04095045,cg21859019,cg22926874
chr1	25174256	25175812	1	Yes	intergenic	NA	No	6	cg04991639,cg12426802,cg15598442,cg17599471,cg02676144,cg10012595	6	cg04991639,cg12426802,cg15598442,cg17599471,cg02676144,cg10012595
chr1	25252515	25259552	2	Yes	promoter	RUNX3	No	40	cg26864395,cg20670361,cg03171924,cg04907595,cg00929376,cg24006721,cg13305657,cg26256263,cg21406271,cg24463471,cg25470148,cg10013501,cg04250451,cg25882256,cg18087266,cg13106389,cg20695936,cg24842859,cg10993442,cg24019564,cg15014975,cg04221877,cg07996594,cg02970551,cg26672794,cg26421310,cg22737001,cg13629563,cg11018723,cg19270505,cg06377278,cg19590532,cg00117172,cg20801718,cg00035000,cg10951873,cg1…	41	cg10597889,cg20670361,cg03171924,cg04907595,cg24006721,cg13305657,cg26256263,cg21406271,cg25470148,cg10013501,cg04250451,cg25882256,cg18087266,cg13106389,cg20695936,cg24842859,cg10993442,cg24019564,cg15014975,cg04221877,cg07996594,cg02970551,cg26672794,cg26421310,cg22737001,cg13629563,cg11018723,cg19270505,cg27095256,cg06377278,cg00117172,cg13932954,cg15643346,cg20801718,cg19140523,cg00035000,cg1…
chr1	25943126	25946601	3	Yes	promoter	MAN1C1	Yes	13	cg10555744,cg09027133,cg16585234,cg16836311,cg10706230,cg05670408,cg05625889,cg09254142,cg00653744,cg08246520,cg00832850,cg20464072,cg26890920	15	cg10555744,cg09027133,cg16585234,cg16836311,cg10706230,cg03307806,cg22988674,cg03820581,cg05670408,cg09254142,cg00653744,cg08246520,cg00832850,cg20464072,cg26890920
chr1	26360846	26363301	3	Yes	gene body	EXTL1	No	8	cg10498813,cg14511768,cg05156800,cg19633962,cg24034429,cg10115632,cg19938567,cg02599835	7	cg10498813,cg05156800,cg19633962,cg24034429,cg10115632,cg19938567,cg02599835
chr1	26371522	26373771	2	Yes	promoter	SLC30A2	No	11	cg03987192,cg18303360,cg10501085,cg19895786,cg00703260,cg07766612,cg21957156,cg02924562,cg02397727,cg05674944,cg00349061	12	cg03987192,cg18303360,cg10501085,cg19895786,cg00703260,cg07766612,cg21957156,cg23066364,cg02924562,cg02397727,cg05674944,cg00349061
chr1	26481001	26483772	3	No	intergenic	NA	No	1	cg00646396	1	cg00646396
chr1	26487247	26489372	2	Yes	gene body	FAM110D	No	9	cg18107827,cg26543657,cg22860775,cg03953671,cg04280647,cg01568347,cg11418559,cg00017970,cg04236334	7	cg18107827,cg26543657,cg22860775,cg03953671,cg04280647,cg00017970,cg04236334
chr1	26490135	26492589	3	Yes	intergenic	NA	Yes	5	cg13223043,cg07916101,cg25018357,cg03844060,cg24519413	5	cg13223043,cg07916101,cg25018357,cg03844060,cg24519413
chr1	26551077	26553279	3	Yes	promoter	RP11-231P20.2	No	7	cg18144988,cg00478361,cg04145287,cg22374940,cg19516105,cg10468070,cg17751366	8	cg18144988,cg00478361,cg22374940,cg19516105,cg20141168,cg10468070,cg09112636,cg17751366
chr1	26685009	26687902	3	Yes	intergenic	NA	No	7	cg04661629,cg15090202,cg05816868,cg18118033,cg05770238,cg01200442,cg01943692	8	cg04661629,cg15090202,cg05816868,cg18118033,cg05770238,cg01200442,cg01943692,cg06469533
chr1	27189027	27191629	3	Yes	promoter	SFN	Yes	14	cg17149882,cg26010562,cg16558172,cg14825555,cg12583970,cg13374701,cg07786675,cg03421300,cg13466284,cg17330303,cg06720467,cg21950166,cg14333454,cg11348165	13	cg17149882,cg26010562,cg16558172,cg14825555,cg12583970,cg13374701,cg07786675,cg03421300,cg13466284,cg06720467,cg21950166,cg14333454,cg11348165
chr1	27675235	27677815	1	Yes	gene body	SYTL1	No	7	cg01963906,cg04123310,cg00851518,cg03750567,cg12748890,cg08157684,cg21139713	9	cg01963906,cg04123310,cg00851518,cg03750567,cg01681396,cg01165781,cg08157684,cg02600983,cg21139713
chr1	27686086	27688262	3	Yes	gene body	MAP3K6	No	7	cg04789365,cg25133130,cg06035600,cg20996351,cg01730970,cg06507987,cg13449606	6	cg04789365,cg06035600,cg20996351,cg01730970,cg06507987,cg13449606
chr1	27940914	27942665	3	Yes	gene body	FGR	No	4	cg23167456,cg13184177,cg22124648,cg03538499	4	cg23167456,cg13184177,cg22124648,cg03538499
chr1	27960085	27961880	2	Yes	promoter	FGR	Yes	10	cg21115433,cg13448978,cg16922167,cg09370867,cg14181576,cg05783223,cg26801631,cg26040332,cg10037521,cg00404394	10	cg21115433,cg24809029,cg13448978,cg01891738,cg16922167,cg09370867,cg05783223,cg26801631,cg26040332,cg00404394
chr1	29138012	29139949	1	Yes	promoter	OPRD1	No	11	cg06779961,cg09970593,cg02785792,cg18141828,cg19715410,cg08366446,cg20003692,cg11413657,cg19738506,cg19869139,cg26064535	10	cg09970593,cg02785792,cg18141828,cg19715410,cg08366446,cg20003692,cg11413657,cg19738506,cg19869139,cg26064535
chr1	29213643	29215341	3	Yes	promoter	EPB41	Yes	9	cg22115596,cg10703813,cg07154196,cg18189938,cg12731400,cg00790928,cg13487185,cg01932091,cg11567310	9	cg27527371,cg22115596,cg10703813,cg07154196,cg12731400,cg00790928,cg13487185,cg01932091,cg11567310
chr1	29447255	29451297	1	Yes	promoter	TMEM200B	Yes	17	cg16117248,cg11296230,cg20819218,cg13548601,cg23905374,cg19716902,cg05124308,cg08258259,cg08467760,cg07556059,cg00866556,cg10165585,cg22698996,cg08706732,cg03315764,cg25840576,cg00553833	20	cg11296230,cg20819218,cg23905374,cg19716902,cg05124308,cg19066570,cg08258259,cg22788029,cg08467760,cg07556059,cg00866556,cg12383121,cg10165585,cg15307678,cg22698996,cg11352060,cg08706732,cg03315764,cg25840576,cg00553833
chr1	29562283	29566653	2	Yes	promoter	PTPRU	Yes	11	cg05673731,cg17670650,cg22795471,cg25319826,cg14724283,cg04125625,cg20167532,cg19112780,cg17758623,cg23987876,cg05064673	13	cg17236519,cg05673731,cg17670650,cg22795471,cg25319826,cg14724283,cg13399697,cg20167532,cg19112780,cg23987876,cg22284828,cg13338595,cg05064673
chr1	29585358	29587877	3	Yes	gene body	PTPRU	No	13	cg08527313,cg00160667,cg17592853,cg05694921,cg13466456,cg03902160,cg21929771,cg03894975,cg26884027,cg04933208,cg05039004,cg00914222,cg02100997	14	cg08527313,cg00160667,cg01253289,cg17592853,cg05694921,cg13466456,cg03902160,cg21929771,cg03894975,cg26884027,cg04933208,cg05039004,cg00914222,cg02100997
chr1	31296368	31298146	3	No	promoter	RP1-65J11.1	No	3	cg24996263,cg13854500,cg13134475	10	cg24996263,cg01299259,cg14585532,cg13854500,cg13134475,cg08372168,cg23944947,cg20338314,cg08693658,cg19941336
chr1	31710953	31713784	1	Yes	promoter	NKAIN1	No	3	cg13103280,cg05960997,cg00832476	9	cg21854165,cg19884203,cg07221201,cg13103280,cg20249402,cg20858149,cg15367245,cg05960997,cg00832476
chr1	32082560	32084552	3	Yes	promoter	HCRTR1	No	10	cg02309594,cg27493864,cg27514105,cg25220359,cg18325794,cg05536984,cg11573219,cg01639898,cg07047963,cg01764046	10	cg02309594,cg27493864,cg27514105,cg25220359,cg18325794,cg05536984,cg01469836,cg11573219,cg07047963,cg01764046
chr1	32227146	32229884	3	Yes	promoter	BAI2	Yes	7	cg07187863,cg10773309,cg15469507,cg26392989,cg21164095,cg17043284,cg04161902	7	cg24897992,cg10773309,cg15469507,cg26392989,cg21164095,cg17043284,cg04161902
chr1	32237190	32239197	2	Yes	intergenic	NA	Yes	6	cg08160462,cg10505580,cg15694605,cg03774520,cg04878000,cg11980897	7	cg08160462,cg10505580,cg15694605,cg03774520,cg04878000,cg11980897,cg02825215
chr1	33167132	33169859	3	Yes	promoter	SYNC	No	7	cg12634957,cg15058557,cg04551500,cg04779013,cg19296960,cg24872163,cg11954384	11	cg12634957,cg15058557,cg04551500,cg20736068,cg04765926,cg04779013,cg06387822,cg19296960,cg05233516,cg24872163,cg11954384
chr1	33335228	33338698	3	No	promoter	FNDC5	No	6	cg25364822,cg20951444,cg17470061,cg27511208,cg00668227,cg25870263	12	cg24558461,cg12031211,cg02373419,cg07376786,cg03831293,cg08298207,cg25364822,cg20951444,cg17470061,cg27511208,cg00668227,cg25870263
chr1	33365734	33367845	3	Yes	promoter	TMEM54	No	5	cg12598340,cg06179485,cg13920521,cg17832212,cg15626665	6	cg12598340,cg06179485,cg13920521,cg17832212,cg15626665,cg01903861
chr1	33389931	33392802	3	No	promoter	AL031602.1	No	7	cg25223191,cg26266099,cg08248611,cg07318867,cg16019005,cg26117025,cg22166728	7	cg25223191,cg27140992,cg26266099,cg08248611,cg07318867,cg16019005,cg22166728
chr1	33545888	33548335	3	Yes	promoter	ADC	No	16	cg05923595,cg15522171,cg12585759,cg26833830,cg00249030,cg13099847,cg23661309,cg17500915,cg07926531,cg24724877,cg17826324,cg03962411,cg22189725,cg12731430,cg02350320,cg14150071	20	cg24398176,cg03177171,cg15522171,cg13161612,cg12245506,cg12585759,cg26833830,cg00249030,cg13099847,cg23661309,cg17500915,cg07926531,cg24724877,cg17826324,cg03962411,cg22189725,cg17957967,cg12731430,cg02350320,cg14150071
chr1	33811906	33816811	3	Yes	promoter	PHC2,RP11-415J8.5	No	13	cg00890378,cg22397446,cg10628982,cg01741932,cg15014010,cg05819172,cg03651583,cg25005345,cg11976407,cg00853964,cg09126995,cg06763161,cg07570498	16	cg17381235,cg00890378,cg22397446,cg10628982,cg01741932,cg15014010,cg08268045,cg01116469,cg05819172,cg03651583,cg15331596,cg25005345,cg00853964,cg09126995,cg06763161,cg07570498
chr1	33893947	33896558	3	Yes	promoter	PHC2	No	5	cg16558908,cg17329292,cg00418068,cg03380518,cg18238908	7	cg16558908,cg19021032,cg26079579,cg17329292,cg00418068,cg03380518,cg18238908
chr1	34627787	34634066	1	Yes	promoter	C1orf94,CSMD2	Yes	28	cg06964608,cg09270225,cg21197216,cg05382123,cg25772827,cg25025247,cg01445580,cg24558425,cg24236085,cg23442151,cg19228118,cg02492778,cg15654121,cg23921342,cg10588150,cg21102477,cg21681396,cg24018609,cg09559021,cg02031245,cg05817517,cg26150071,cg04272632,cg02187889,cg00004257,cg20314038,cg03391055,cg24490542	34	cg06964608,cg09270225,cg21197216,cg05382123,cg25772827,cg27019257,cg22015449,cg25025247,cg01445580,cg24558425,cg26711073,cg11318232,cg19685156,cg24236085,cg23442151,cg19228118,cg02492778,cg25496967,cg15654121,cg23921342,cg10588150,cg21102477,cg21681396,cg24018609,cg09559021,cg02031245,cg05817517,cg26150071,cg04272632,cg02187889,cg00004257,cg20314038,cg03391055,cg24490542
chr1	34641911	34643400	3	Yes	promoter	AC115286.1,C1orf94	No	14	cg18328755,cg04323427,cg04025150,cg13329248,cg16348470,cg22697574,cg02656891,cg24411961,cg16384849,cg10431747,cg27557134,cg26226879,cg11524446,cg15098077	15	cg09596405,cg18328755,cg23135442,cg04323427,cg04025150,cg13329248,cg16348470,cg22697574,cg02656891,cg01956976,cg24411961,cg16384849,cg27557134,cg26226879,cg11524446
chr1	35246193	35248347	3	Yes	promoter	GJB3	No	10	cg04370730,cg00492873,cg18262616,cg13263483,cg13429414,cg15512835,cg09178385,cg00259249,cg21151355,cg13488851	10	cg04370730,cg21353284,cg00492873,cg13263483,cg13429414,cg15512835,cg09178385,cg00259249,cg21151355,cg13488851
chr1	35257733	35259406	3	Yes	promoter	GJA4	No	7	cg15006973,cg13364230,cg10106804,cg07070934,cg02902318,cg00416130,cg22558673	7	cg15006973,cg13364230,cg01822203,cg10106804,cg07070934,cg00416130,cg22558673
chr1	35349995	35352231	1	Yes	gene body	DLGAP3	No	9	cg11951427,cg06759265,cg18852567,cg00114029,cg26228266,cg18113535,cg13709618,cg01240433,cg24626851	8	cg11951427,cg06759265,cg18852567,cg26228266,cg18113535,cg27335300,cg13709618,cg01240433
chr1	35393656	35396941	3	Yes	promoter	DLGAP3	Yes	6	cg15081344,cg08213098,cg05046525,cg05860313,cg17418463,cg15392844	6	cg15081344,cg08213098,cg05046525,cg05860313,cg17418463,cg15392844
chr1	36038020	36041158	2	Yes	promoter	RP4-728D4.2,TFAP2E	No	12	cg05845757,cg17474422,cg14962509,cg01101380,cg26372517,cg13060114,cg09364688,cg19587534,cg13558810,cg22851880,cg11835197,cg00149492	16	cg05845757,cg17474422,cg14962509,cg01155426,cg13263950,cg17583667,cg01101380,cg26372517,cg09364688,cg15047582,cg19587534,cg13558810,cg22851880,cg11835197,cg00149492,cg00572482
chr1	36041433	36044605	2	Yes	promoter	RP4-728D4.2	No	8	cg08424184,cg12038696,cg22436429,cg24685006,cg18131141,cg07167423,cg19163067,cg07196426	9	cg08424184,cg24570841,cg12038696,cg22436429,cg24685006,cg18131141,cg07167423,cg19163067,cg07196426
chr1	36172338	36175009	1	Yes	promoter	RN7SL281P	Yes	5	cg07091016,cg15187113,cg09755617,cg06210054,cg09109122	5	cg07091016,cg15187113,cg06210054,cg09109122,cg10369482
chr1	36589931	36591923	3	Yes	promoter	COL8A2	No	5	cg27042226,cg08639948,cg18795461,cg21545605,cg06501835	5	cg27042226,cg08639948,cg18795461,cg21545605,cg06501835
chr1	36785682	36790737	1	Yes	promoter	EVA1B,RP11-268J15.5,SH3D21	No	18	cg22810403,cg03507534,cg15095906,cg08452766,cg14023023,cg18238858,cg14128890,cg04010586,cg16394290,cg13500072,cg22721579,cg23672278,cg17139085,cg11673291,cg02993069,cg12679760,cg17942851,cg00426377	24	cg22810403,cg19047559,cg27617214,cg03484255,cg03507534,cg03407907,cg15095906,cg22090115,cg08452766,cg14023023,cg18238858,cg02805356,cg14128890,cg04010586,cg16394290,cg13500072,cg22721579,cg23672278,cg17139085,cg11673291,cg02993069,cg12679760,cg17942851,cg00426377
chr1	37497773	37504555	2	Yes	promoter	GRIK3	No	16	cg17815567,cg24673742,cg06165395,cg19727439,cg19206040,cg16379885,cg16599703,cg10126715,cg20168230,cg08004425,cg13272644,cg06722633,cg04510788,cg03149432,cg04364463,cg01577933	16	cg05392859,cg17815567,cg24673742,cg06165395,cg19727439,cg19206040,cg16379885,cg16599703,cg10126715,cg20168230,cg08004425,cg13272644,cg06722633,cg04510788,cg23107256,cg01577933
chr1	37938726	37940153	3	Yes	promoter	RP11-422J8.1,ZC3H12A	No	11	cg03129643,cg26309987,cg19644445,cg08706837,cg17161388,cg06921501,cg12600418,cg26007664,cg15949277,cg24635860,cg03140118	12	cg03129643,cg26309987,cg19644445,cg08706837,cg17161388,cg06921501,cg12600418,cg26007664,cg15949277,cg24635860,cg03140118,cg06401842
chr1	38098795	38101276	2	Yes	promoter	RSPO1	No	15	cg26519919,cg10573018,cg03654735,cg12391690,cg22063989,cg13448605,cg04878955,cg10628818,cg08655686,cg06626655,cg04862500,cg00870095,cg13568283,cg25199283,cg13054119	14	cg26519919,cg10573018,cg03654735,cg12391690,cg22063989,cg00554229,cg08509564,cg04878955,cg10628818,cg06626655,cg04862500,cg00870095,cg25199283,cg13054119
chr1	38200330	38201750	3	Yes	gene body	EPHA10	No	3	cg11664987,cg04622024,cg24375409	3	cg11664987,cg04622024,cg24375409
chr1	38217657	38220341	2	Yes	promoter	EPHA10	No	7	cg14523898,cg13851466,cg12139725,cg13452258,cg17717442,cg01855272,cg04247829	7	cg14523898,cg12139725,cg05180208,cg13452258,cg17717442,cg01855272,cg04247829
chr1	38229651	38232783	3	Yes	promoter	EPHA10	No	16	cg10122079,cg00013409,cg08737136,cg01796781,cg26653529,cg21439231,cg00667938,cg06163371,cg21306240,cg18537001,cg07447922,cg20510207,cg12128017,cg12158389,cg17515737,cg13779907	15	cg10122079,cg00013409,cg08737136,cg01796781,cg26653529,cg21439231,cg00667938,cg14002285,cg21306240,cg18537001,cg20510207,cg12128017,cg12158389,cg17515737,cg13779907
chr1	38258567	38261692	3	Yes	promoter	MANEAL	No	17	cg02460018,cg00664416,cg24433287,cg04219099,cg02851558,cg12900583,cg18105315,cg23631842,cg10702645,cg06214983,cg03946269,cg27291080,cg26828057,cg08657424,cg07003115,cg00801514,cg24709531	22	cg02460018,cg00664416,cg24433287,cg04219099,cg11994057,cg02851558,cg15962646,cg12900583,cg18105315,cg19154068,cg24945636,cg23631842,cg20892332,cg10702645,cg06214983,cg03946269,cg27291080,cg26828057,cg08657424,cg07003115,cg00801514,cg24709531
chr1	38507678	38514663	3	Yes	promoter	POU3F1,RP5-884C9.2	Yes	23	cg03030665,cg12622182,cg17791651,cg21270860,cg27537203,cg17412602,cg12789062,cg03636215,cg03753481,cg14279007,cg12714180,cg05336094,cg18755829,cg18451114,cg13193455,cg19769760,cg08599259,cg22821908,cg25488697,cg25609528,cg13149116,cg05785481,cg07077978	20	cg03030665,cg12622182,cg17791651,cg27537203,cg27259382,cg12789062,cg03636215,cg03753481,cg21567792,cg12714180,cg05336094,cg18755829,cg18451114,cg13193455,cg19769760,cg08599259,cg25488697,cg25609528,cg13149116,cg07077978
chr1	38940351	38943199	1	Yes	promoter	RP11-329N22.1	No	9	cg08713722,cg11959697,cg03216506,cg00725089,cg04406436,cg02983950,cg06086731,cg00073543,cg00817765	14	cg08713722,cg11959697,cg03216506,cg11866742,cg00725089,cg04406436,cg02983950,cg06086731,cg00073543,cg08917530,cg00817765,cg25203772,cg19641672,cg25578443
chr1	39043293	39045147	3	Yes	intergenic	NA	No	6	cg16924985,cg07550394,cg15489005,cg19857737,cg23048481,cg21816308	6	cg16924985,cg07550394,cg15489005,cg19857737,cg23048481,cg21816308
chr1	39268967	39270841	3	Yes	intergenic	NA	No	7	cg22022568,cg17834155,cg04267214,cg21848143,cg06546406,cg06556218,cg16992161	7	cg22022568,cg17834155,cg04267214,cg21848143,cg06546406,cg06556218,cg16992161
chr1	39283028	39285212	3	Yes	intergenic	NA	No	7	cg02860281,cg06419400,cg09110148,cg10445421,cg17722884,cg10702770,cg06197836	7	cg02860281,cg06419400,cg09110148,cg10445421,cg17722884,cg10702770,cg06197836
chr1	39545707	39548985	3	Yes	promoter	MACF1	Yes	11	cg11676353,cg20286956,cg26906273,cg15522353,cg13514129,cg19812272,cg18794145,cg00349607,cg00503866,cg00426822,cg22233974	12	cg04580369,cg18185472,cg11676353,cg20286956,cg26906273,cg13514129,cg19812272,cg18794145,cg00349607,cg00503866,cg00426822,cg22233974
chr1	39955989	39958391	3	Yes	promoter	BMP8A	No	17	cg11763509,cg10523966,cg25139493,cg03664992,cg13806070,cg09547767,cg02575697,cg08748615,cg16651196,cg14415733,cg15947940,cg04923576,cg09232440,cg27567593,cg19494946,cg17685111,cg04287168	14	cg10523966,cg25139493,cg03664992,cg13806070,cg09547767,cg08748615,cg16651196,cg15947940,cg04923576,cg09232440,cg19494946,cg17685111,cg10475635,cg04287168
chr1	40074856	40076330	3	No	intergenic	NA	No	2	cg15123755,cg02959988	2	cg15123755,cg02959988
chr1	40098023	40099542	3	No	promoter	HEYL,RP1-144F13.3	No	2	cg12634306,cg00034101	8	cg06848790,cg11242602,cg12130560,cg08355042,cg12634306,cg23776628,cg00034101,cg14821136
chr1	40104383	40106309	3	Yes	promoter	HEYL	No	7	cg06154570,cg12160637,cg17602126,cg17449954,cg23037132,cg05720261,cg13457165	8	cg26855786,cg06154570,cg12160637,cg17602126,cg17449954,cg23037132,cg05720261,cg13457165
chr1	40136591	40138600	2	Yes	promoter	NT5C1A	No	9	cg06209491,cg00990022,cg18862767,cg01656955,cg19509030,cg23045719,cg10052561,cg21280510,cg06357371	8	cg06209491,cg00990022,cg18862767,cg01656955,cg19509030,cg10052561,cg21280510,cg06357371
chr1	40156498	40158764	2	Yes	promoter	HPCAL4	No	16	cg06094482,cg01811100,cg02495604,cg07317551,cg01775082,cg21011110,cg03578662,cg19320564,cg15322430,cg18285309,cg16040504,cg22827640,cg25031380,cg19314945,cg11462533,cg14165978	18	cg06094482,cg18877284,cg02495604,cg07317551,cg01775082,cg21011110,cg22483100,cg14537321,cg16100915,cg03578662,cg19320564,cg15322430,cg18285309,cg16040504,cg22827640,cg19314945,cg11462533,cg14165978
chr1	40166182	40167932	1	No	intergenic	NA	No	1	cg20966426	1	cg20966426
chr1	40253445	40255850	2	Yes	promoter	BMP8B,RP1-118J21.25	No	18	cg26051619,cg06616202,cg03401114,cg11788010,cg02297616,cg08551248,cg03741406,cg08873266,cg04858616,cg13458335,cg00758584,cg19613400,cg18217145,cg11201606,cg18108008,cg15728256,cg11139646,cg05249084	16	cg06616202,cg03401114,cg11788010,cg02297616,cg08551248,cg03741406,cg08873266,cg04858616,cg13458335,cg26727902,cg19613400,cg18217145,cg11201606,cg18108008,cg15728256,cg05249084
chr1	40364876	40367589	3	Yes	promoter	MYCL	No	5	cg24059976,cg08063724,cg04366039,cg01847380,cg16163765	4	cg24059976,cg08063724,cg01847380,cg16163765
chr1	40420050	40422475	1	Yes	promoter	MFSD2A	No	16	cg20017415,cg12070152,cg26908611,cg03317400,cg10313417,cg18885365,cg10390736,cg10101749,cg13181052,cg16796590,cg03434149,cg15978014,cg19694978,cg23962483,cg27173717,cg01869896	15	cg20017415,cg12070152,cg26908611,cg03317400,cg18885365,cg10390736,cg10101749,cg13181052,cg16796590,cg03434149,cg19694978,cg23962483,cg27173717,cg03562826,cg01869896
chr1	40780047	40783875	2	Yes	promoter	COL9A2	No	21	cg04100190,cg12733396,cg18186394,cg23847109,cg14844588,cg26011014,cg26710722,cg06953252,cg24686358,cg00068503,cg03470396,cg16989117,cg06721528,cg22030684,cg06636289,cg20145692,cg07367434,cg14036923,cg10512203,cg02961012,cg15264708	23	cg10398407,cg01728173,cg04100190,cg12733396,cg18186394,cg06063903,cg23847109,cg14844588,cg26011014,cg26710722,cg24686358,cg00068503,cg03470396,cg16989117,cg06721528,cg22030684,cg06636289,cg26632656,cg20145692,cg07367434,cg14036923,cg02961012,cg15264708
chr1	40973493	40975788	1	Yes	promoter	EXO5,RP11-656D10.3	No	10	cg26032489,cg06158040,cg16215249,cg21285895,cg25568243,cg02892595,cg26776069,cg04936970,cg20771287,cg04933954	18	cg26032489,cg06158040,cg16215249,cg23131418,cg14807701,cg21285895,cg25568243,cg12075306,cg22270604,cg02946519,cg11924831,cg26776069,cg20237447,cg04936970,cg20771287,cg04933954,cg09825488,cg22689269
chr1	41247685	41250908	3	Yes	promoter	KCNQ4	No	10	cg26520930,cg13438961,cg00630164,cg00682386,cg14011415,cg09674251,cg24884207,cg19254479,cg16294363,cg06885782	12	cg26520930,cg13438961,cg00630164,cg00682386,cg14011415,cg11390751,cg09674251,cg24884207,cg19254479,cg16294363,cg25243771,cg06885782
chr1	41326193	41328032	1	Yes	promoter	CITED4	No	7	cg22748573,cg02368874,cg06949234,cg18917399,cg26834479,cg13150171,cg04011995	7	cg22748573,cg02368874,cg06949234,cg18917399,cg26834479,cg13150171,cg04011995
chr1	41349347	41350814	3	Yes	intergenic	NA	No	5	cg11152463,cg06248701,cg08870646,cg01376402,cg13472192	4	cg11152463,cg08870646,cg01376402,cg13472192
chr1	41827020	41829537	3	Yes	promoter	FOXO6	Yes	6	cg18742814,cg19471466,cg24402067,cg12431729,cg00834379,cg09992883	7	cg18742814,cg19471466,cg24402067,cg12431729,cg13784898,cg00834379,cg09992883
chr1	41831148	41833318	3	Yes	gene body	FOXO6	Yes	5	cg11735311,cg11173422,cg03678139,cg15012766,cg01420426	6	cg11735311,cg11173422,cg03678139,cg15012766,cg01420426,cg16667869
chr1	41846428	41850156	3	Yes	gene body	FOXO6	No	13	cg13483447,cg08144172,cg24596898,cg11828180,cg00290994,cg03893446,cg08462924,cg00385863,cg09588555,cg06359703,cg00596048,cg19619003,cg01193554	13	cg13688351,cg13483447,cg08144172,cg24596898,cg11828180,cg00290994,cg03893446,cg00385863,cg09588555,cg06359703,cg00596048,cg19619003,cg01193554
chr1	41961210	41962802	1	Yes	intergenic	NA	Yes	4	cg08037719,cg04140553,cg23226358,cg04290779	4	cg08037719,cg04140553,cg23226358,cg04290779
chr1	42382754	42386338	3	Yes	promoter	HIVEP3	Yes	15	cg24049493,cg16145216,cg15542713,cg17098103,cg15644324,cg15937073,cg03884592,cg26038582,cg25607920,cg23762517,cg16685388,cg17945447,cg11424962,cg13689737,cg02031397	18	cg24049493,cg16145216,cg15542713,cg08872577,cg17098103,cg13429998,cg15644324,cg15937073,cg11769885,cg03884592,cg05570491,cg26038582,cg23762517,cg14996491,cg16685388,cg17945447,cg11424962,cg02031397
chr1	42845284	42847734	3	Yes	promoter	RIMKLA	No	9	cg14981313,cg14899716,cg19646327,cg11813246,cg16534233,cg21774736,cg25593916,cg13199589,cg14778711	8	cg14899716,cg19646327,cg16534233,cg21774736,cg25593916,cg10723635,cg13199589,cg14778711
chr1	44870236	44875586	2	Yes	promoter	RNF220	No	22	cg15590950,cg19719902,cg05597624,cg01422881,cg04541474,cg10224098,cg04023150,cg14403130,cg26341102,cg16822216,cg00023154,cg13675568,cg06550214,cg03946896,cg00825951,cg24515341,cg26035323,cg17243637,cg01267315,cg01175682,cg21686694,cg17329287	25	cg15590950,cg19719902,cg05597624,cg22123777,cg01422881,cg04541474,cg10224098,cg04023150,cg14403130,cg26341102,cg16822216,cg00023154,cg06550214,cg03946896,cg00825951,cg24515341,cg26035323,cg17243637,cg01267315,cg01175682,cg21612167,cg17341755,cg21686694,cg03636912,cg17329287
chr1	44882484	44884709	1	Yes	gene body	RNF220	No	11	cg04830825,cg12049688,cg11715828,cg16547629,cg12548634,cg13880950,cg19382731,cg15576900,cg18180569,cg00069860,cg08094291	10	cg04830825,cg12049688,cg11715828,cg16547629,cg12548634,cg13880950,cg19382731,cg18180569,cg00069860,cg08094291
chr1	45081972	45083817	3	Yes	gene body	RNF220	Yes	7	cg26098401,cg20944964,cg13189207,cg10329345,cg00150520,cg20820767,cg24591770	6	cg26098401,cg20944964,cg13189207,cg10329345,cg20820767,cg24591770
chr1	45251357	45252944	3	Yes	promoter	BEST4	No	2	cg06170941,cg22160000	1	cg22160000
chr1	45669867	45672165	1	Yes	promoter	ZSWIM5	Yes	7	cg10636391,cg05393563,cg06408034,cg17852594,cg04296578,cg13227621,cg04380118	8	cg10636391,cg05393563,cg06408034,cg17852594,cg04296578,cg13227621,cg08188437,cg04380118
chr1	46858403	46861474	1	Yes	promoter	FAAH	No	10	cg25706281,cg01134183,cg01412524,cg20271029,cg16267850,cg18261491,cg12671744,cg19921581,cg06911238,cg15198148	13	cg25706281,cg01134183,cg01412524,cg23538557,cg20099409,cg16610041,cg20271029,cg16267850,cg18261491,cg12671744,cg19921581,cg06911238,cg15198148
chr1	46912496	46915534	2	Yes	promoter	RP5-1109J22.2	No	6	cg01057635,cg13922291,cg00279790,cg14258341,cg25757115,cg19922871	8	cg08467089,cg07423489,cg01057635,cg13922291,cg00279790,cg14258341,cg25757115,cg19922871
chr1	46931399	46933458	3	Yes	gene body	LINC00505	No	4	cg18337938,cg06776173,cg04167064,cg11461030	5	cg12006126,cg14899375,cg18337938,cg04167064,cg11461030
chr1	46953999	46959999	2	Yes	intergenic	NA	Yes	17	cg19899395,cg14914422,cg22604316,cg18164611,cg27564123,cg00833614,cg05050657,cg09326404,cg18475643,cg25974897,cg16064097,cg21010407,cg04159901,cg15723350,cg16634661,cg22697864,cg01858698	17	cg19899395,cg14914422,cg22604316,cg18164611,cg27564123,cg00833614,cg05050657,cg09326404,cg18475643,cg25974897,cg16064097,cg21010407,cg04159901,cg23730906,cg16634661,cg22697864,cg01858698
chr1	47008857	47010848	3	Yes	gene body	MKNK1-AS1	No	7	cg13353942,cg17291907,cg14415160,cg00514268,cg24465685,cg06660332,cg06995548	8	cg13353942,cg17291907,cg14415160,cg00514268,cg24465685,cg06660332,cg06995548,cg08643108
chr1	47081283	47083512	3	Yes	promoter	MKNK1,MOB3C	No	11	cg05376185,cg00950809,cg07347511,cg05965334,cg03409548,cg01823416,cg24677082,cg03699079,cg11798658,cg15933935,cg03345668	13	cg05376185,cg00950809,cg07347511,cg05965334,cg00228018,cg03409548,cg00729314,cg01823416,cg26914061,cg24677082,cg11798658,cg15933935,cg03345668
chr1	47488600	47490873	3	Yes	promoter	CYP4X1	No	8	cg11828446,cg10387890,cg16689634,cg00255821,cg26558485,cg13158571,cg27291464,cg12279601	9	cg11828446,cg10387890,cg16689634,cg00255821,cg26558485,cg03021048,cg13158571,cg06496648,cg13975894
chr1	47673651	47675227	3	No	intergenic	NA	No	1	cg12677330	2	cg12058922,cg12677330
chr1	47690164	47692276	2	Yes	promoter	RP1-18D14.7,TAL1	Yes	8	cg07087686,cg01001098,cg03885399,cg00955828,cg10810752,cg10380348,cg06432479,cg10771090	10	cg07087686,cg01001098,cg03885399,cg22894910,cg06997800,cg00955828,cg10810752,cg10380348,cg06432479,cg10771090
chr1	47694075	47698711	2	Yes	promoter	TAL1	No	21	cg26881761,cg10121601,cg02241397,cg04363624,cg25764899,cg01418261,cg19247124,cg09135016,cg10961841,cg03752218,cg10633601,cg01147107,cg06209689,cg26891410,cg18131548,cg19797376,cg06955484,cg00875272,cg06087421,cg10026317,cg11399254	36	cg19577136,cg25268605,cg26881761,cg10121601,cg02241397,cg00538229,cg01739251,cg24991020,cg04363624,cg25764899,cg06463365,cg19918343,cg26939858,cg01418261,cg11432900,cg11766986,cg19247124,cg09135016,cg10961841,cg15857764,cg03167717,cg19665732,cg02180010,cg03752218,cg10633601,cg01147107,cg06209689,cg26891410,cg18131548,cg05252749,cg19797376,cg06955484,cg00875272,cg06087421,cg10026317,cg11399254
chr1	47897717	47901066	2	Yes	promoter	FOXD2,FOXD2-AS1	No	13	cg25880954,cg03440588,cg08638320,cg22438763,cg09269866,cg09277376,cg24931632,cg13851904,cg18595867,cg05658236,cg08892370,cg05402131,cg00580340	13	cg25880954,cg15868302,cg03440588,cg08638320,cg22438763,cg09269866,cg09277376,cg24931632,cg13851904,cg18595867,cg05658236,cg05402131,cg00580340
chr1	47901760	47904771	2	Yes	promoter	FOXD2	No	14	cg16022575,cg04501188,cg10172301,cg07287463,cg09515767,cg13682692,cg07954828,cg21391919,cg06611075,cg16657448,cg26366304,cg00914781,cg14106085,cg16342298	12	cg04501188,cg07287463,cg09515767,cg13682692,cg07954828,cg21391919,cg06611075,cg16657448,cg26366304,cg00914781,cg14106085,cg16342298
chr1	47908818	47912279	2	Yes	intergenic	NA	Yes	15	cg08260398,cg21535606,cg26864230,cg06531379,cg13936452,cg20284629,cg00203284,cg06829686,cg19250799,cg03499234,cg13674174,cg13167730,cg24525176,cg21475270,cg16013720	15	cg08260398,cg21535606,cg26864230,cg06531379,cg13936452,cg20284629,cg00203284,cg06829686,cg19250799,cg03499234,cg13674174,cg13167730,cg24525176,cg21475270,cg16013720
chr1	47973145	47975274	3	Yes	intergenic	NA	No	9	cg17243193,cg10582749,cg05040441,cg19628758,cg16818909,cg06187843,cg14287868,cg18036569,cg11585805	9	cg17243193,cg10582749,cg05040441,cg19628758,cg16818909,cg06187843,cg14287868,cg18036569,cg11585805
chr1	48058133	48059589	3	Yes	intergenic	NA	No	6	cg17739555,cg25137711,cg08258582,cg07274590,cg07376547,cg08640804	4	cg17739555,cg25137711,cg07274590,cg08640804
chr1	48173598	48176893	2	Yes	intergenic	NA	No	11	cg06320401,cg10985440,cg00807959,cg02364551,cg01260146,cg20986652,cg03515878,cg13961784,cg19428290,cg01802640,cg24940885	12	cg06320401,cg10985440,cg24362926,cg00807959,cg18973011,cg02364551,cg01260146,cg20986652,cg03515878,cg13961784,cg01802640,cg24940885
chr1	48190032	48192252	3	Yes	intergenic	NA	No	6	cg16125989,cg22345063,cg08275015,cg25018801,cg16064054,cg11193462	7	cg16125989,cg22345063,cg05514783,cg08275015,cg25018801,cg16064054,cg11193462
chr1	48448992	48451116	3	Yes	gene body	TRABD2B	No	6	cg04871498,cg08456859,cg03607680,cg05138148,cg17425810,cg06556795	5	cg04871498,cg08456859,cg05138148,cg17425810,cg06556795
chr1	48460020	48462805	3	Yes	promoter	TRABD2B	No	6	cg16321568,cg22814737,cg17001101,cg19419874,cg03810376,cg20597127	9	cg20373037,cg16321568,cg24065381,cg22814737,cg27271231,cg15077994,cg17001101,cg03810376,cg20597127
chr1	50488837	50490666	3	Yes	promoter	AGBL4	Yes	15	cg08716372,cg21834207,cg26249046,cg13424673,cg05387519,cg03217897,cg26682094,cg03732087,cg05759718,cg20931033,cg07913294,cg14615336,cg18540492,cg16260421,cg12127196	15	cg07520029,cg21834207,cg26249046,cg13424673,cg05387519,cg03217897,cg26682094,cg03732087,cg05759718,cg20931033,cg07913294,cg14615336,cg18540492,cg16260421,cg12127196
chr1	50512984	50515123	3	Yes	promoter	ELAVL4	No	11	cg00322486,cg01511557,cg00963169,cg13678973,cg05697849,cg02623400,cg19098763,cg18202449,cg10989897,cg22932804,cg06124579	13	cg00322486,cg01511557,cg00963169,cg13678973,cg05697849,cg02623400,cg19098763,cg18202449,cg10989897,cg15539697,cg22932804,cg16754374,cg06124579
chr1	50798200	50799876	3	Yes	intergenic	NA	Yes	8	cg02710163,cg03255135,cg23219859,cg08375866,cg17745088,cg24397815,cg11702368,cg00137944	8	cg02710163,cg03255135,cg23219859,cg08375866,cg04327598,cg17745088,cg24397815,cg11702368
chr1	50880603	50883776	2	Yes	gene body	DMRTA2	No	12	cg23097402,cg22711792,cg17603689,cg17088073,cg18122419,cg00009292,cg02340083,cg27529871,cg14179581,cg01891252,cg16391955,cg07382435	11	cg23097402,cg22711792,cg17603689,cg17088073,cg18122419,cg00009292,cg02340083,cg14179581,cg01891252,cg16391955,cg07382435
chr1	50885959	50887684	2	Yes	promoter	DMRTA2	No	9	cg06159394,cg00184452,cg12756396,cg25191628,cg04455430,cg16732616,cg00945234,cg07362328,cg13909582	10	cg06159394,cg00184452,cg14492446,cg12756396,cg25191628,cg04455430,cg16732616,cg00945234,cg07362328,cg13909582
chr1	50887852	50890221	2	Yes	promoter	DMRTA2	Yes	14	cg18198999,cg10936352,cg27265170,cg10776919,cg19380001,cg13210260,cg00152008,cg11448896,cg06921573,cg26560222,cg19030579,cg17800654,cg09846084,cg06724305	14	cg18198999,cg10936352,cg27265170,cg10776919,cg19380001,cg13210260,cg00152008,cg11448896,cg06921573,cg21592065,cg26560222,cg19030579,cg09846084,cg06724305
chr1	50895549	50897305	2	No	intergenic	NA	No	3	cg09275956,cg04166042,cg10200388	4	cg09275956,cg04166042,cg10200388,cg20967739
chr1	51433253	51436532	2	Yes	promoter	CDKN2C	No	20	cg15631690,cg27393398,cg06949081,cg07099107,cg10982358,cg16135470,cg19640439,cg16147336,cg04772086,cg04720785,cg08539090,cg10450322,cg07908422,cg19089033,cg07370959,cg17894331,cg07013994,cg16911228,cg01145389,cg00908631	19	cg06949081,cg07099107,cg16135470,cg23902761,cg19640439,cg04772086,cg04720785,cg08539090,cg10450322,cg19995437,cg05184630,cg07908422,cg19089033,cg07370959,cg17894331,cg07013994,cg16911228,cg01145389,cg00908631
chr1	51441703	51444951	2	Yes	intergenic	NA	Yes	16	cg11654900,cg19719311,cg06011285,cg06096824,cg01701959,cg08545574,cg00570896,cg13460944,cg27433451,cg26219095,cg07314186,cg00776601,cg10893043,cg00968536,cg21140898,cg23090529	14	cg11654900,cg19719311,cg06011285,cg06096824,cg08545574,cg00570896,cg13460944,cg27433451,cg26219095,cg07314186,cg00776601,cg10893043,cg21140898,cg23090529
chr1	51795376	51797637	3	Yes	promoter	RP11-275F13.1,TTC39A	No	5	cg05132999,cg13500576,cg26351104,cg22368208,cg06082920	8	cg05132999,cg08225365,cg13500576,cg26351104,cg22368208,cg06082920,cg26286530,cg22322597
chr1	51809694	51811349	3	Yes	promoter	TTC39A	Yes	9	cg26913502,cg12688609,cg10653240,cg00770085,cg23271269,cg01016553,cg03397750,cg03814321,cg07591515	10	cg26913502,cg22101814,cg12688609,cg03716227,cg10653240,cg00770085,cg23271269,cg03397750,cg03814321,cg07591515
chr1	53067050	53069369	3	Yes	promoter	GPX7	No	11	cg09161043,cg02453146,cg23272399,cg16557944,cg20950465,cg11953272,cg22129364,cg26251270,cg12640469,cg18087326,cg01400822	14	cg09161043,cg02453146,cg23272399,cg16557944,cg20950465,cg11953272,cg19833985,cg06612871,cg03452047,cg22129364,cg26251270,cg01436716,cg18087326,cg01400822
chr1	53097865	53099808	3	Yes	promoter	FAM159A	No	8	cg00065957,cg18146843,cg11279444,cg05651283,cg17088631,cg09068158,cg22434763,cg04882349	8	cg00065957,cg18146843,cg11279444,cg05651283,cg17526999,cg09068158,cg22434763,cg26845363
chr1	53307470	53310446	3	Yes	promoter	ZYG11A	No	8	cg18184411,cg00397635,cg24466241,cg06784991,cg06335143,cg16015712,cg08736216,cg09167911	10	cg06249768,cg18184411,cg00397635,cg08781559,cg24466241,cg06784991,cg06335143,cg05553634,cg08736216,cg09167911
chr1	53386070	53388033	3	Yes	promoter	ECHDC2	No	8	cg18761118,cg06600287,cg13461509,cg17185953,cg12060472,cg09128567,cg15986841,cg10554624	11	cg18761118,cg06600287,cg05519231,cg13461509,cg17185953,cg23456286,cg12060472,cg13834343,cg12017577,cg09128567,cg10554624
chr1	53392248	53394329	3	Yes	promoter	ECHDC2,MIR1273F,SCP2	No	13	cg05232215,cg01802117,cg03579872,cg04310824,cg13685833,cg12220753,cg03609269,cg24543286,cg25767906,cg08859206,cg27535305,cg22082456,cg18880500	16	cg05232215,cg02813845,cg01802117,cg03579872,cg04310824,cg13685833,cg12220753,cg03609269,cg24543286,cg05909164,cg20055417,cg25767906,cg08859206,cg27535305,cg22082456,cg18880500
chr1	53526693	53529480	2	Yes	promoter	PODN	No	11	cg01568973,cg16899892,cg23092823,cg17104425,cg04875084,cg13764106,cg01394819,cg04765848,cg16028753,cg04918175,cg25629790	14	cg01568973,cg16899892,cg23092823,cg17104425,cg04875084,cg23537747,cg13764106,cg01394819,cg00674864,cg04765848,cg07803474,cg16028753,cg04918175,cg11747595
chr1	54202762	54205979	2	Yes	intergenic	NA	No	10	cg05154856,cg11379439,cg20149137,cg02237319,cg20275889,cg08657361,cg01868405,cg04306024,cg17786642,cg05927190	10	cg05154856,cg11379439,cg20149137,cg02237319,cg20275889,cg08657361,cg01868405,cg04306024,cg17786642,cg05927190
chr1	54586875	54588289	3	Yes	intergenic	NA	No	4	cg03586803,cg05364767,cg21785067,cg24579373	3	cg03586803,cg05364767,cg21785067
chr1	54939717	54942561	1	Yes	intergenic	NA	Yes	6	cg08106066,cg24834436,cg21156129,cg19756821,cg12078320,cg00782828	5	cg08106066,cg21156129,cg19756821,cg12078320,cg00782828
chr1	54952430	54954027	1	Yes	intergenic	NA	Yes	3	cg18755543,cg04605287,cg00868131	3	cg18755543,cg04605287,cg00868131
chr1	54964052	54966271	3	Yes	intergenic	NA	Yes	5	cg06897860,cg13541961,cg20808893,cg10499176,cg25340098	5	cg06897860,cg13541961,cg20808893,cg10499176,cg11985186
chr1	55445472	55447114	3	Yes	promoter	TMEM61	Yes	12	cg20377762,cg03762549,cg04986555,cg20082904,cg01189112,cg19583968,cg14838433,cg08937380,cg11987231,cg02008416,cg07192718,cg19638175	11	cg20377762,cg03762549,cg20082904,cg01189112,cg19583968,cg19966772,cg14838433,cg08937380,cg02008416,cg07192718,cg26903748
chr1	55461750	55463957	3	Yes	promoter	BSND	No	7	cg00307818,cg02854331,cg11811705,cg09666006,cg08038776,cg02392553,cg18384681	7	cg00307818,cg02854331,cg11811705,cg09666006,cg08038776,cg02392553,cg18384681
chr1	55504432	55507563	3	Yes	promoter	PCSK9	Yes	16	cg14977608,cg17826594,cg19249107,cg00382944,cg08920610,cg13191808,cg17167852,cg09072162,cg25957967,cg26666107,cg05118916,cg06197377,cg14993491,cg26047355,cg01444643,cg00045070	18	cg14977608,cg17826594,cg19249107,cg25795075,cg14752245,cg08920610,cg25902309,cg13191808,cg17167852,cg09072162,cg25957967,cg14214659,cg26666107,cg05118916,cg14993491,cg26047355,cg01444643,cg00045070
chr1	57109554	57112595	1	Yes	promoter	PRKAA2	No	15	cg02361458,cg05494069,cg09313917,cg09935045,cg09686317,cg26068551,cg12167830,cg04876835,cg24277313,cg05656934,cg13892954,cg19083779,cg09763175,cg25617691,cg06836772	14	cg05494069,cg09313917,cg09935045,cg09686317,cg26068551,cg12167830,cg04876835,cg24277313,cg05656934,cg19083779,cg09763175,cg25617691,cg06836772,cg05894391
chr1	57886608	57891177	3	Yes	promoter	DAB1	Yes	15	cg07173275,cg08458292,cg12480034,cg20272619,cg03384825,cg07566080,cg05919360,cg19166660,cg08141165,cg00002810,cg22676693,cg17491850,cg01899797,cg22485350,cg19717595	13	cg07173275,cg08458292,cg12480034,cg03384825,cg05919360,cg19166660,cg08141165,cg00002810,cg22676693,cg17491850,cg01899797,cg22485350,cg19717595
chr1	58713460	58716810	3	Yes	promoter	DAB1	Yes	15	cg07201450,cg06710648,cg11256607,cg26345888,cg24351410,cg00848728,cg01100068,cg15574705,cg27510182,cg05375728,cg04937080,cg10715265,cg01451162,cg18863090,cg08164484	18	cg07201450,cg10087412,cg06710648,cg14947965,cg11256607,cg26345888,cg21177673,cg24351410,cg00848728,cg01100068,cg15574705,cg27510182,cg05375728,cg04937080,cg10715265,cg01451162,cg18863090,cg08164484
chr1	59041114	59043934	1	Yes	promoter	TACSTD2	No	16	cg27398499,cg05346878,cg19813884,cg01821018,cg16699148,cg04863005,cg16080552,cg17210938,cg13443627,cg10347335,cg05065507,cg13786801,cg24851854,cg00554413,cg00667789,cg21536783	15	cg27398499,cg05346878,cg19813884,cg01821018,cg16699148,cg04863005,cg16080552,cg17210938,cg13443627,cg10347335,cg05065507,cg13786801,cg00554413,cg00667789,cg21536783
chr1	59245669	59249658	1	Yes	promoter	JUN	No	12	cg02533419,cg00543485,cg17933911,cg00569244,cg21749312,cg12271199,cg15156614,cg12229666,cg02339674,cg09414137,cg16645584,cg02669989	13	cg02533419,cg00543485,cg17933911,cg00569244,cg21749312,cg12271199,cg15156614,cg15281998,cg12229666,cg02339674,cg09414137,cg16645584,cg02669989
chr1	60280581	60282718	3	Yes	promoter	HOOK1	No	6	cg18348836,cg21577889,cg12067687,cg15900248,cg23996071,cg07248310	7	cg18348836,cg18338027,cg21577889,cg12067687,cg15900248,cg23996071,cg07248310
chr1	60391479	60393308	3	Yes	promoter	CYP2J2	No	8	cg26815229,cg17760678,cg04996523,cg13799302,cg07430760,cg20690488,cg13132577,cg11540204	14	cg26815229,cg25336746,cg19365328,cg27061049,cg16667730,cg17760678,cg03009196,cg02814457,cg04996523,cg13799302,cg07430760,cg20690488,cg13132577,cg11540204
chr1	61508069	61510106	1	Yes	gene body	NFIA	Yes	6	cg27427318,cg03149128,cg01051545,cg00339300,cg00812299,cg06661242	6	cg27427318,cg03149128,cg01051545,cg00339300,cg00812299,cg06661242
chr1	61515232	61521219	2	Yes	gene body	NFIA	Yes	17	cg11254532,cg26013992,cg09550810,cg13883696,cg17042098,cg24430419,cg10773698,cg02140384,cg22877452,cg09113483,cg14815301,cg15545624,cg06995880,cg02444243,cg04093972,cg07848728,cg02911518	15	cg26013992,cg09550810,cg13883696,cg24430419,cg10773698,cg02140384,cg22877452,cg09113483,cg14815301,cg15545624,cg02444243,cg04093972,cg07848728,cg02911518,cg09439467
chr1	61522031	61524540	3	No	gene body	NFIA	Yes	5	cg06510397,cg24034347,cg02892350,cg01879507,cg25369553	5	cg07328569,cg06510397,cg02892350,cg01879507,cg25369553
chr1	61544915	61550442	3	Yes	promoter	AC096534.1,NFIA	Yes	26	cg18946602,cg27353619,cg19682514,cg03951424,cg00163784,cg11531787,cg10069638,cg23996948,cg20059467,cg05377596,cg25837719,cg19747357,cg04706404,cg20289988,cg03132702,cg21412992,cg13980007,cg17017152,cg01063572,cg08037935,cg12079303,cg10628205,cg15546227,cg14093103,cg04998202,cg21414842	32	cg18946602,cg27353619,cg19682514,cg03951424,cg11531787,cg03829442,cg10069638,cg23996948,cg12339583,cg02614099,cg15265313,cg14278029,cg20059467,cg05377596,cg25837719,cg19747357,cg04706404,cg26174713,cg20289988,cg03132702,cg21412992,cg13980007,cg17017152,cg01063572,cg08037935,cg12079303,cg10628205,cg15546227,cg14093103,cg02846651,cg04998202,cg21414842
chr1	62751230	62753423	3	No	gene body	KANK4	Yes	1	cg24537942	1	cg24537942
chr1	62783427	62785744	2	Yes	promoter	KANK4	No	10	cg04217096,cg00625425,cg14660586,cg06372391,cg16028201,cg07558455,cg09588271,cg08845123,cg05539515,cg04211018	9	cg04217096,cg00625425,cg14660586,cg16028201,cg07558455,cg09588271,cg08845123,cg05539515,cg04211018
chr1	63538843	63540567	3	No	intergenic	NA	No	5	cg15672853,cg12806613,cg02077472,cg23166865,cg24693225	4	cg15672853,cg12806613,cg23166865,cg24693225
chr1	63781652	63797804	3	Yes	promoter	FOXD3,LINC00466,RP4-792G4.2	Yes	58	cg21695661,cg15837212,cg10249375,cg21244177,cg05923687,cg00347677,cg20321153,cg11953254,cg02426376,cg22724741,cg23623386,cg01067151,cg13906377,cg06925855,cg25144893,cg02483593,cg25286536,cg06198384,cg13435718,cg21836358,cg18279094,cg15841063,cg10097295,cg22815110,cg11848563,cg12690148,cg23620340,cg26789332,cg15462232,cg11248715,cg02595809,cg06912182,cg10197870,cg20810903,cg11134425,cg23592947,cg1…	68	cg09317437,cg21695661,cg15837212,cg10249375,cg05923687,cg00347677,cg20321153,cg11953254,cg02426376,cg22724741,cg23623386,cg01067151,cg13906377,cg06925855,cg25144893,cg02483593,cg25286536,cg06198384,cg13435718,cg20735430,cg08244360,cg04908308,cg04813832,cg21836358,cg18279094,cg15841063,cg17734803,cg08112534,cg22815110,cg11848563,cg04372882,cg23620340,cg26789332,cg15462232,cg17910371,cg11248715,cg0…
chr1	64821694	64823263	3	No	intergenic	NA	No	1	cg02697373	1	cg02697373
chr1	64934551	64936280	1	Yes	promoter	CACHD1	No	6	cg03202416,cg15132650,cg12809259,cg01393233,cg12730853,cg03068051	6	cg03202416,cg15132650,cg12809259,cg01393233,cg12730853,cg03068051
chr1	65466497	65469729	3	Yes	promoter	RP4-535B20.4	No	10	cg13853591,cg11989330,cg00455424,cg13379827,cg15583014,cg14792081,cg01340542,cg00600454,cg15208832,cg06748470	12	cg13853591,cg11989330,cg00455424,cg13379827,cg15583014,cg14792081,cg01340542,cg05522023,cg00600454,cg15208832,cg09774749,cg06748470
chr1	65611947	65617296	1	Yes	promoter	AK4	No	20	cg26524552,cg24049468,cg23523648,cg18324123,cg13297881,cg18312587,cg00009916,cg01523799,cg21570528,cg20802051,cg10142878,cg21942430,cg06661924,cg09864858,cg02619167,cg23164993,cg10482024,cg23013958,cg10380652,cg26151454	25	cg26524552,cg24049468,cg23523648,cg18324123,cg13297881,cg18312587,cg06930309,cg00009916,cg01523799,cg21570528,cg20802051,cg10142878,cg21942430,cg09864858,cg02619167,cg23164993,cg25028357,cg17526470,cg17346745,cg10482024,cg23013958,cg10380652,cg10282673,cg06412210,cg26151454
chr1	65719242	65722022	3	Yes	intergenic	NA	No	8	cg19807361,cg22712797,cg21449450,cg13498872,cg19924025,cg11516629,cg09216236,cg22497933	10	cg03054432,cg19807361,cg22712797,cg21449450,cg13498872,cg19924025,cg11516629,cg09216236,cg17849070,cg22497933
chr1	65729824	65732626	3	Yes	promoter	DNAJC6	Yes	12	cg20299703,cg04994405,cg07027116,cg00466108,cg26615127,cg24550010,cg09082287,cg09235539,cg04567445,cg26304237,cg08856601,cg04993276	13	cg20299703,cg04994405,cg00466108,cg26615127,cg24550010,cg09082287,cg09235539,cg04567445,cg08856601,cg04993276,cg27037565,cg21119717,cg19057348
chr1	65990504	65992445	3	Yes	promoter	LEPR	No	6	cg03514351,cg03401738,cg16987305,cg00630958,cg08234308,cg14199090	9	cg03514351,cg03401738,cg16987305,cg00630958,cg25290445,cg08234308,cg05197142,cg06900008,cg14199090
chr1	66257394	66259967	2	Yes	promoter	PDE4B	No	12	cg24637364,cg26963271,cg00046625,cg19754554,cg26832142,cg04110665,cg22488256,cg22336004,cg16294013,cg04704294,cg08716655,cg22733910	12	cg24637364,cg26963271,cg00046625,cg26832142,cg09444657,cg10552807,cg22488256,cg22336004,cg16294013,cg01373831,cg04704294,cg22733910
chr1	66997912	67000595	3	Yes	promoter	SGIP1	No	12	cg19406367,cg25203031,cg02994349,cg00089915,cg27558095,cg00920348,cg13052034,cg17162576,cg14610403,cg00460049,cg21604450,cg05971061	19	cg25942611,cg19406367,cg25203031,cg02641990,cg02994349,cg03879673,cg00089915,cg27558095,cg00920348,cg13052034,cg25976504,cg03685124,cg17162576,cg19899563,cg17692242,cg14610403,cg16001682,cg21604450,cg05971061
chr1	67217216	67219058	1	Yes	promoter	TCTEX1D1	No	13	cg19159365,cg24161501,cg25339566,cg17284804,cg09318375,cg11824639,cg19808205,cg16996144,cg14207728,cg24110050,cg08857729,cg09769134,cg17819635	12	cg19159365,cg24161501,cg25339566,cg17284804,cg09318375,cg11824639,cg19808205,cg16996144,cg24110050,cg08857729,cg09769134,cg17819635
chr1	67772586	67774546	3	Yes	promoter	IL12RB2	No	12	cg11242303,cg04311496,cg20803547,cg15991072,cg00993824,cg27416067,cg03975876,cg06952660,cg00318756,cg19745415,cg11132246,cg01356829	10	cg11242303,cg04311496,cg20803547,cg15991072,cg00993824,cg27416067,cg06952660,cg00318756,cg19745415,cg01356829
chr1	68296314	68300194	1	Yes	promoter	GNG12,GNG12-AS1	No	14	cg26764244,cg25189904,cg13399816,cg13184736,cg03140521,cg17885091,cg23251970,cg18795395,cg10178795,cg14512363,cg26678852,cg17931620,cg03110901,cg00884805	17	cg11187160,cg20703974,cg26764244,cg25189904,cg13399816,cg13184736,cg03140521,cg23251970,cg18795395,cg10178795,cg14512363,cg26678852,cg10722251,cg19248585,cg06451878,cg03110901,cg00884805
chr1	68694323	68699440	2	Yes	promoter	WLS	No	14	cg14025652,cg02711326,cg25131922,cg04565067,cg01490102,cg26255447,cg17479999,cg04447890,cg06872176,cg19246266,cg22454660,cg00242147,cg20611882,cg00320094	17	cg17050011,cg14025652,cg02711326,cg25131922,cg04565067,cg01490102,cg17479999,cg05450267,cg04447890,cg09094121,cg06872176,cg19246266,cg22454660,cg00242147,cg20611882,cg04760471,cg00320094
chr1	68758350	68761029	3	No	intergenic	NA	No	1	cg13844049	2	cg13844049,cg14141421
chr1	70032218	70036676	2	Yes	promoter	LRRC7	Yes	19	cg22076941,cg17177995,cg23624008,cg22812684,cg00338801,cg00165323,cg14520424,cg09167553,cg15513163,cg21004042,cg23730181,cg00973653,cg02860282,cg18881684,cg14424049,cg13057857,cg00989492,cg22025849,cg13448816	21	cg22076941,cg23624008,cg22812684,cg00338801,cg00165323,cg14520424,cg09167553,cg15513163,cg27036290,cg17741477,cg22413194,cg06747440,cg21004042,cg23730181,cg02860282,cg18881684,cg14424049,cg13057857,cg00989492,cg22025849,cg13448816
chr1	71512298	71514492	3	Yes	promoter	PTGER3,ZRANB2-AS1	No	10	cg00781169,cg20785136,cg00915178,cg03726881,cg12739034,cg14963735,cg23647191,cg17218713,cg15201877,cg23823908	14	cg00781169,cg14250931,cg20785136,cg00915178,cg03726881,cg12739034,cg22827627,cg14963735,cg00211648,cg00183742,cg23647191,cg17218713,cg15201877,cg23823908
chr1	72748624	72751567	3	Yes	promoter	NEGR1	Yes	10	cg24437625,cg02394421,cg07602492,cg21774281,cg24525913,cg04985396,cg23714541,cg07721244,cg26153364,cg01425670	9	cg24437625,cg02394421,cg07602492,cg21774281,cg24525913,cg04985396,cg23714541,cg26153364,cg01425670
chr1	75138396	75140723	3	No	promoter	C1orf173	No	13	cg09365529,cg17736840,cg03035538,cg03513964,cg13341453,cg27268184,cg15386773,cg19695945,cg22427475,cg27393126,cg24155871,cg03537032,cg19634242	11	cg09365529,cg17736840,cg03035538,cg03513964,cg13341453,cg27268184,cg15386773,cg22427475,cg27393126,cg03537032,cg19634242
chr1	75594960	75603967	2	Yes	promoter	LHX8,RP11-510C10.2,RP11-510C10.3	No	34	cg14035231,cg00145253,cg12764034,cg14832406,cg08146483,cg08272731,cg19764599,cg23952663,cg26309264,cg25368122,cg10095577,cg13691003,cg23166389,cg07404921,cg19411474,cg05352087,cg11842415,cg06615678,cg00681106,cg10237044,cg11750396,cg12435629,cg23845450,cg14613402,cg03326762,cg03445694,cg13492103,cg02861380,cg13478928,cg07563793,cg17473600,cg22694818,cg10029842,cg05449257	38	cg14035231,cg00145253,cg12764034,cg14832406,cg08146483,cg08272731,cg15343302,cg19764599,cg23952663,cg25368122,cg08587354,cg27544731,cg23451528,cg10095577,cg13691003,cg07404921,cg19411474,cg05352087,cg11842415,cg06615678,cg01726202,cg19188436,cg11936040,cg01573457,cg10237044,cg11750396,cg23845450,cg14613402,cg03326762,cg03445694,cg13492103,cg02861380,cg13478928,cg07563793,cg17473600,cg22694818,cg1…
chr1	76079666	76083306	3	Yes	intergenic	NA	Yes	16	cg26940178,cg20818417,cg05725004,cg17888155,cg24694675,cg27547954,cg20467168,cg21081832,cg03662422,cg21879454,cg07923233,cg27510832,cg04290579,cg04095732,cg00765830,cg07381464	17	cg26940178,cg20818417,cg05725004,cg17888155,cg24694675,cg27547954,cg20467168,cg21081832,cg03662422,cg17199271,cg21879454,cg07923233,cg27510832,cg04290579,cg04095732,cg00765830,cg07381464
chr1	77332529	77336460	3	Yes	promoter	ST6GALNAC5	No	17	cg02639927,cg25272065,cg25306611,cg08431563,cg23231420,cg18380175,cg23243867,cg21961707,cg00294096,cg04077662,cg06201642,cg13463054,cg13823136,cg16966815,cg27519691,cg15100100,cg09511846	18	cg02639927,cg25272065,cg25306611,cg08431563,cg23231420,cg18380175,cg23243867,cg21961707,cg00294096,cg06201642,cg13463054,cg13823136,cg16966815,cg27519691,cg15100100,cg09051357,cg06489596,cg00228272
chr1	77746534	77750101	1	Yes	promoter	AK5	No	14	cg27175634,cg22949149,cg13392141,cg11595082,cg17445007,cg02099814,cg17014953,cg26466094,cg04867733,cg17484154,cg25604883,cg23241335,cg16409049,cg17181543	14	cg27175634,cg22949149,cg11595082,cg22840802,cg26466094,cg17484154,cg24137137,cg07316309,cg11696936,cg25604883,cg23241335,cg16409049,cg19663886,cg17181543
chr1	78510264	78513288	1	Yes	promoter	GIPC2	No	12	cg24719487,cg24496666,cg04912843,cg25288420,cg00347563,cg09107315,cg01074657,cg09662920,cg09826056,cg19766489,cg20785560,cg26263401	15	cg19433225,cg24719487,cg24496666,cg04912843,cg25288420,cg00347563,cg09107315,cg21497935,cg01074657,cg09662920,cg09826056,cg19766489,cg20785560,cg00406225,cg15036411
chr1	78956041	78957988	3	Yes	promoter	PTGFR	Yes	10	cg19403909,cg02859837,cg00701741,cg24924936,cg03495868,cg27046936,cg03949391,cg24022301,cg09685982,cg04410756	13	cg19403909,cg02859837,cg00701741,cg24924936,cg03495868,cg27046936,cg03949391,cg08776080,cg20092458,cg03842686,cg09685982,cg15258025,cg04410756
chr1	84463696	84466016	1	Yes	promoter	TTLL7	No	9	cg17237813,cg03980824,cg05919561,cg10977910,cg04407776,cg00773459,cg15028282,cg17010394,cg03098721	10	cg17237813,cg03980824,cg05919561,cg10977910,cg04407776,cg23561053,cg00773459,cg15028282,cg17010394,cg03098721
chr1	85357688	85361130	3	Yes	promoter	LPAR3	No	9	cg14420494,cg10776377,cg13554207,cg07553626,cg01144693,cg09912667,cg10879116,cg00890774,cg02234820	10	cg14420494,cg13554207,cg07553626,cg01144693,cg09912667,cg15802554,cg11292453,cg10879116,cg00890774,cg02234820
chr1	85461654	85464942	2	Yes	promoter	MCOLN2,WDR63	No	13	cg23106912,cg06402325,cg15639684,cg07478468,cg25375340,cg22168369,cg20804700,cg11262906,cg22153463,cg17600851,cg09848789,cg09369316,cg01413809	17	cg24810550,cg12671634,cg17479169,cg05177459,cg23106912,cg06402325,cg15639684,cg07478468,cg25375340,cg22168369,cg11262906,cg22153463,cg17600851,cg09879434,cg09848789,cg09369316,cg01413809
chr1	85512119	85516129	2	Yes	promoter	MCOLN3	No	16	cg12210618,cg21147310,cg17754945,cg10515956,cg13331559,cg21649051,cg04437841,cg01396567,cg12387700,cg23752923,cg05003422,cg20280350,cg15129679,cg00893493,cg12037450,cg02345146	17	cg04558302,cg12210618,cg21147310,cg17754945,cg10515956,cg13331559,cg06388206,cg21649051,cg01204391,cg04437841,cg01396567,cg12387700,cg23752923,cg05003422,cg15129679,cg00893493,cg02345146
chr1	85928328	85931961	1	Yes	promoter	DDAH1	No	15	cg05925894,cg14322224,cg05004108,cg15396570,cg11648968,cg25756066,cg08946575,cg05654711,cg00156072,cg02572729,cg25277534,cg24448326,cg21589280,cg16253641,cg11243029	16	cg05925894,cg14322224,cg05004108,cg15396570,cg11648968,cg08946575,cg05654711,cg07701442,cg00156072,cg02572729,cg25277534,cg07130520,cg24448326,cg21589280,cg16253641,cg11243029
chr1	86041713	86045769	1	Yes	promoter	CYR61,DDAH1,RP11-290M5.4	No	15	cg07165167,cg12278705,cg13871826,cg17108141,cg10593400,cg24724587,cg00183684,cg20431191,cg23080733,cg16399910,cg06983715,cg06363275,cg12218697,cg11737676,cg14985076	18	cg07165167,cg12278705,cg12278431,cg02254587,cg13871826,cg17108141,cg10593400,cg05690441,cg24724587,cg00183684,cg20431191,cg23080733,cg16399910,cg06983715,cg06363275,cg12218697,cg11737676,cg14985076
chr1	86620026	86623477	2	Yes	promoter	COL24A1	No	13	cg07198150,cg21841239,cg24700222,cg21913319,cg24395801,cg13683218,cg09264282,cg12644264,cg08276739,cg04622601,cg07143532,cg17223809,cg07598580	11	cg07198150,cg21841239,cg24700222,cg21913319,cg24395801,cg13683218,cg09264282,cg08276739,cg04622601,cg17223809,cg07598580
chr1	87597347	87598918	3	Yes	promoter	RP5-1052I5.1	No	10	cg08371190,cg08732750,cg11582018,cg09221932,cg09365624,cg20390741,cg04579203,cg25428451,cg14540297,cg06350257	8	cg08371190,cg09221932,cg09365624,cg20390741,cg04579203,cg25428451,cg14540297,cg06350257
chr1	90097228	90100594	3	Yes	promoter	LRRC8C,RP11-302M6.4,RP5-1007M22.2	Yes	10	cg06804564,cg00064255,cg16170006,cg26669876,cg21401794,cg18312997,cg06353330,cg21541030,cg14254720,cg06641366	16	cg06804564,cg00064255,cg03082095,cg16170006,cg26669876,cg21401794,cg18312997,cg06353330,cg12711743,cg21541030,cg14254720,cg22473125,cg18489923,cg04291124,cg06641366,cg08901429
chr1	90227826	90229805	3	Yes	gene body	LRRC8C,RP11-302M6.4	No	8	cg10576151,cg21155367,cg00606914,cg14181947,cg06363214,cg13063202,cg03145924,cg08655788	9	cg10576151,cg07539182,cg21155367,cg00606914,cg14181947,cg06363214,cg13063202,cg03145924,cg08655788
chr1	91171178	91173551	2	Yes	intergenic	NA	No	9	cg22501793,cg26611723,cg19731044,cg26415571,cg03714573,cg10062141,cg22605303,cg08980837,cg13927566	8	cg22501793,cg26611723,cg19731044,cg26415571,cg03714573,cg10062141,cg22605303,cg08980837
chr1	91181673	91186255	2	Yes	promoter	BARHL2	Yes	26	cg07318983,cg13361185,cg14795752,cg24884703,cg22507154,cg00088183,cg14696458,cg12656020,cg26917140,cg19811087,cg14712186,cg07135732,cg20311863,cg11823511,cg13939859,cg25026529,cg00010742,cg17241310,cg18322569,cg06959142,cg06384463,cg01921432,cg26332310,cg13486820,cg13975503,cg15979173	25	cg07318983,cg13361185,cg14795752,cg24884703,cg22507154,cg00088183,cg14696458,cg12656020,cg26917140,cg19811087,cg14712186,cg07135732,cg20311863,cg11823511,cg13939859,cg25026529,cg00010742,cg17241310,cg13146465,cg18322569,cg06959142,cg06384463,cg01921432,cg13486820,cg13975503
chr1	91188634	91196954	2	Yes	intergenic	NA	Yes	38	cg07158747,cg14419975,cg27523527,cg17170758,cg04929932,cg08713568,cg04560225,cg00910518,cg12071888,cg13200838,cg00000165,cg13844193,cg20041088,cg14663264,cg24347994,cg22167515,cg06936155,cg03974889,cg07995570,cg16005939,cg01984304,cg02368058,cg13456504,cg15992284,cg08062812,cg26072058,cg20463526,cg24453699,cg15452970,cg19414591,cg20634266,cg05039548,cg17480076,cg26568372,cg21542223,cg02595750,cg1…	40	cg07158747,cg14419975,cg27523527,cg17170758,cg04929932,cg08713568,cg04560225,cg00910518,cg12071888,cg13200838,cg00000165,cg13844193,cg20041088,cg14663264,cg24347994,cg11549945,cg22167515,cg06936155,cg03974889,cg07995570,cg16005939,cg01984304,cg12208392,cg02368058,cg13456504,cg15992284,cg08062812,cg20463526,cg24453699,cg15452970,cg19414591,cg20634266,cg05039548,cg26568372,cg21542223,cg25416818,cg0…
chr1	91315680	91318189	3	Yes	promoter	RP4-665J23.1,RP4-665J23.2	No	9	cg13993270,cg19769850,cg13437711,cg03347944,cg09257488,cg00371239,cg25105561,cg09327714,cg11159604	11	cg13993270,cg19769850,cg13140338,cg13437711,cg26647237,cg03347944,cg09257488,cg00371239,cg25105561,cg09327714,cg11159604
chr1	92349772	92352901	3	Yes	promoter	TGFBR3	No	19	cg00563926,cg07557690,cg23113350,cg08848903,cg19846193,cg19756345,cg17074213,cg23636324,cg01002341,cg24879809,cg09838042,cg17284082,cg10012640,cg16382382,cg25204077,cg26542412,cg17074704,cg01336162,cg00342358	20	cg00563926,cg07557690,cg23113350,cg08848903,cg19846193,cg19756345,cg05422343,cg17074213,cg23636324,cg01002341,cg24879809,cg09838042,cg17284082,cg10012640,cg16382382,cg25204077,cg26542412,cg17074704,cg01336162,cg00342358
chr1	92494561	92496842	3	Yes	promoter	EPHX4	Yes	10	cg25622928,cg00314240,cg00662684,cg22694470,cg13984181,cg01347529,cg18379537,cg15156367,cg07197585,cg11585358	15	cg02095589,cg25622928,cg00314240,cg00662684,cg22694470,cg13984181,cg10896924,cg03009464,cg05259767,cg01347529,cg13592485,cg18379537,cg15156367,cg07197585,cg11585358
chr1	92945304	92953249	2	Yes	promoter	GFI1	Yes	65	cg25320328,cg04777348,cg24517501,cg23624705,cg20125091,cg24683414,cg18182148,cg17858328,cg16297569,cg26027669,cg27432653,cg04158367,cg14475915,cg22341104,cg11954479,cg16358430,cg18221467,cg10832495,cg25232660,cg22488998,cg24999255,cg15068050,cg20164253,cg19366591,cg07968720,cg01258522,cg08892208,cg20813081,cg13138155,cg12810233,cg00791905,cg04838747,cg26015176,cg00697033,cg06647562,cg05796321,cg1…	67	cg25320328,cg04777348,cg24517501,cg23624705,cg20125091,cg24683414,cg18182148,cg17858328,cg16297569,cg26027669,cg27432653,cg04158367,cg25402655,cg14475915,cg22341104,cg11954479,cg16358430,cg18221467,cg10832495,cg25232660,cg22461187,cg22488998,cg23328066,cg14434926,cg24999255,cg15068050,cg07968720,cg01258522,cg08892208,cg20813081,cg13138155,cg12810233,cg00791905,cg04838747,cg26015176,cg00697033,cg0…
chr1	94700774	94704357	1	Yes	promoter	ARHGAP29	Yes	15	cg01812146,cg20335213,cg09162146,cg24150153,cg11630965,cg26513192,cg23257569,cg22950210,cg17490932,cg01784852,cg26229607,cg09583777,cg19765451,cg13466117,cg24049050	18	cg01812146,cg01527715,cg20335213,cg09162146,cg24150153,cg11630965,cg26513192,cg23257569,cg14185291,cg22950210,cg17490932,cg01784852,cg26229607,cg09583777,cg19765451,cg13466117,cg24049050,cg14999309
chr1	94711366	94714069	2	Yes	promoter	RP11-148B18.1	Yes	8	cg07840482,cg22225673,cg26802053,cg12720424,cg15727564,cg17078826,cg24726641,cg02435573	10	cg03545542,cg07840482,cg22225673,cg06341103,cg12720424,cg15727564,cg24726641,cg14550667,cg02435573,cg19101113
chr1	94884024	94885975	3	Yes	promoter	ABCD3	No	5	cg09869791,cg12578791,cg11202785,cg02756545,cg09357580	5	cg16094024,cg09869791,cg12578791,cg11202785,cg02756545
chr1	95284565	95287193	1	Yes	promoter	LINC01057,SLC44A3	No	14	cg14981637,cg20059151,cg09260072,cg04314247,cg21412865,cg17801055,cg09017894,cg21271961,cg11490941,cg22424108,cg17599609,cg18143535,cg20817062,cg15571882	14	cg14981637,cg20059151,cg04314247,cg21412865,cg05058672,cg17801055,cg09017894,cg21271961,cg11490941,cg22424108,cg17599609,cg18143535,cg20817062,cg15571882
chr1	95582938	95584456	3	Yes	promoter	RP11-57H12.6,TMEM56	No	5	cg21932672,cg19514928,cg16611895,cg20774650,cg05043032	6	cg21932672,cg19141677,cg19514928,cg16611895,cg06259438,cg05043032
chr1	98509288	98512379	2	Yes	promoter	MIR137HG	No	13	cg10489614,cg05423529,cg14783814,cg22333214,cg04293733,cg19050990,cg04763554,cg04282138,cg09022943,cg00091285,cg26924294,cg25372296,cg02658730	13	cg10489614,cg16789076,cg13417096,cg05423529,cg22333214,cg04293733,cg19050990,cg04763554,cg04282138,cg09022943,cg00091285,cg26924294,cg02658730
chr1	98513642	98515815	3	No	intergenic	NA	No	10	cg14035771,cg19236995,cg03208936,cg08730623,cg24866936,cg22158212,cg19361032,cg00059034,cg04288975,cg27395666	12	cg20713662,cg14035771,cg26390542,cg19236995,cg03208936,cg08730623,cg24866936,cg22158212,cg19361032,cg00059034,cg04288975,cg27395666
chr1	98517887	98520886	3	Yes	intergenic	NA	Yes	7	cg10202113,cg20062737,cg09011883,cg21525592,cg10695831,cg09896412,cg11983196	7	cg10202113,cg20062737,cg09011883,cg21525592,cg10695831,cg09896412,cg11983196
chr1	99468646	99471765	3	Yes	promoter	LPPR5,RP5-896L10.1	No	15	cg03593336,cg14241810,cg05657427,cg26266842,cg06124224,cg19365673,cg10159215,cg03120289,cg18623672,cg14991984,cg26527487,cg21782593,cg24373253,cg26034531,cg20318156	18	cg12986379,cg03593336,cg14241810,cg05657427,cg26266842,cg20857364,cg19365673,cg10159215,cg03120289,cg24270716,cg18623672,cg14991984,cg26527487,cg21782593,cg24373253,cg26034531,cg20318156,cg15340645
chr1	99729151	99731024	3	Yes	promoter	LPPR4	No	11	cg13385995,cg18644191,cg11956761,cg03646889,cg03580297,cg06060191,cg26164310,cg18947801,cg05596294,cg15728779,cg00388673	12	cg13385995,cg18644191,cg11956761,cg03646889,cg03580297,cg06060191,cg26164310,cg18947801,cg05596294,cg25902816,cg15728779,cg00388673
chr1	101004083	101006228	2	Yes	promoter	GPR88	No	9	cg13876809,cg11882432,cg07706463,cg22602002,cg03696327,cg14421860,cg16007456,cg10298815,cg14855972	9	cg13876809,cg11882432,cg07706463,cg22602002,cg03696327,cg14421860,cg16007456,cg10298815,cg14855972
chr1	101700467	101704985	1	Yes	promoter	RP4-575N6.4,S1PR1	No	19	cg17972213,cg23978968,cg10020333,cg07400091,cg18757941,cg17859448,cg10210739,cg20166532,cg05053688,cg21385047,cg18323466,cg04156369,cg25012864,cg05338680,cg02628801,cg20740769,cg05160678,cg04701420,cg19038540	25	cg17972213,cg23978968,cg10020333,cg07400091,cg18757941,cg17859448,cg10210739,cg20166532,cg05053688,cg21385047,cg18323466,cg04156369,cg19529579,cg25700611,cg16634914,cg02353844,cg19353409,cg23102367,cg25012864,cg05338680,cg02628801,cg20740769,cg05160678,cg04701420,cg19038540
chr1	103572350	103574242	3	No	promoter	COL11A1	Yes	7	cg24495344,cg00325149,cg12884406,cg20847625,cg26436330,cg09183742,cg27229407	8	cg05028472,cg24495344,cg00325149,cg12884406,cg20847625,cg26436330,cg09183742,cg27229407
chr1	108505192	108507804	3	Yes	promoter	VAV3,VAV3-AS1	No	6	cg25848557,cg24662718,cg16120828,cg25602490,cg19753230,cg01422262	12	cg25848557,cg07334393,cg15737840,cg24662718,cg16120828,cg25602490,cg03130528,cg21510680,cg23330563,cg19753230,cg01422262,cg15354823
chr1	109419621	109421562	3	Yes	promoter	GPSM2	No	3	cg03934069,cg22161131,cg01969748	6	cg24707290,cg03934069,cg22161131,cg01969748,cg21726313,cg20908709
chr1	109654921	109657698	3	Yes	promoter	C1orf194,KIAA1324	No	15	cg16797831,cg03919114,cg06059849,cg04994773,cg27430662,cg09820792,cg00009167,cg26045220,cg23599104,cg13932362,cg19378640,cg15077558,cg08031955,cg13921387,cg26523099	17	cg16797831,cg06059849,cg04994773,cg16763708,cg07078644,cg27430662,cg09820792,cg00009167,cg10908973,cg26045220,cg23599104,cg13932362,cg19378640,cg08031955,cg02220767,cg13921387,cg26523099
chr1	110008361	110010640	3	Yes	promoter	SYPL2	No	9	cg11161837,cg21079113,cg10127483,cg07571041,cg13673164,cg07589691,cg20591472,cg12515325,cg12465704	12	cg11161837,cg21079113,cg10127483,cg07571041,cg13673164,cg07589691,cg24460301,cg02238388,cg20591472,cg12515325,cg13141442,cg12465704
chr1	110051385	110053665	3	Yes	promoter	AMIGO1	No	10	cg01178795,cg24304268,cg00791218,cg06764670,cg12419308,cg21646186,cg05947402,cg19896612,cg17185401,cg08367326	11	cg16436162,cg01178795,cg24304268,cg00791218,cg17764988,cg06764670,cg12419308,cg05947402,cg19896612,cg17185401,cg08367326
chr1	110281610	110283978	1	Yes	promoter	GSTM3	No	6	cg25027501,cg09152047,cg23472215,cg00297950,cg23645476,cg10807101	11	cg04545003,cg02880629,cg08525331,cg25027501,cg04903060,cg15967012,cg11913652,cg09152047,cg00297950,cg23645476,cg10807101
chr1	110452168	110455444	3	Yes	promoter	CSF1	Yes	10	cg20815701,cg22621745,cg04543026,cg23089438,cg24326142,cg05005301,cg25730577,cg02361903,cg07568430,cg08139855	15	cg03004597,cg20815701,cg22621745,cg04543026,cg27432785,cg23089438,cg25479038,cg23755461,cg24326142,cg07676328,cg02409133,cg25730577,cg02361903,cg07568430,cg08139855
chr1	110609745	110614076	2	Yes	promoter	ALX3	No	17	cg08719081,cg16127759,cg08478074,cg05622465,cg19092096,cg02011351,cg06809252,cg10023272,cg23871640,cg22494858,cg06215569,cg11071207,cg00484358,cg18786873,cg13803688,cg01572884,cg04975966	18	cg08719081,cg16127759,cg08478074,cg22896493,cg05622465,cg19092096,cg02011351,cg15442459,cg06809252,cg10023272,cg23871640,cg22494858,cg06215569,cg00484358,cg18786873,cg13803688,cg01572884,cg04975966
chr1	110625889	110627943	2	Yes	promoter	RP4-773N10.6	Yes	9	cg13372811,cg24939845,cg04792863,cg06455470,cg11812069,cg03910767,cg08471800,cg23660154,cg21830222	9	cg13372811,cg24939845,cg04792863,cg06455470,cg11812069,cg03910767,cg08471800,cg23660154,cg21830222
chr1	110692541	110694548	2	Yes	promoter	SLC6A17	No	8	cg15374686,cg01791587,cg05949020,cg13048512,cg11885396,cg01202526,cg17032646,cg23235497	7	cg15374686,cg05949020,cg13048512,cg11885396,cg01202526,cg17032646,cg23235497
chr1	110753120	110756495	3	Yes	promoter	KCNC4,KCNC4-AS1	No	11	cg09898793,cg13902210,cg05675373,cg11737742,cg24599205,cg23593145,cg26569469,cg03152785,cg13080626,cg00924484,cg21528620	16	cg09898793,cg04678902,cg06588059,cg13902210,cg05675373,cg11737742,cg24599205,cg23593145,cg26569469,cg03152785,cg13080626,cg00924484,cg21528620,cg16834929,cg03556151,cg19065748
chr1	111097481	111098897	3	Yes	intergenic	NA	No	6	cg00971737,cg04275027,cg17725100,cg00480136,cg02585459,cg04780572	6	cg00971737,cg04275027,cg17725100,cg00480136,cg02585459,cg04780572
chr1	111148013	111151294	2	Yes	promoter	KCNA2	No	12	cg26297344,cg08770506,cg01722423,cg00207865,cg25281171,cg14208112,cg18935813,cg00791468,cg22165175,cg20941453,cg16773028,cg24676612	14	cg26297344,cg09217258,cg15346919,cg08770506,cg13938497,cg01722423,cg00207865,cg25281171,cg14208112,cg21294342,cg00791468,cg22165175,cg16773028,cg24676612
chr1	111216150	111218827	3	Yes	promoter	KCNA3	No	17	cg18395935,cg07421287,cg00995520,cg03483626,cg07903677,cg26071016,cg09410234,cg07808555,cg06750832,cg01423964,cg11595545,cg26013553,cg20302133,cg15726426,cg21286921,cg13925011,cg19942256	16	cg18395935,cg07421287,cg00995520,cg03483626,cg07903677,cg09545197,cg09410234,cg07808555,cg01423964,cg11595545,cg26013553,cg20302133,cg15726426,cg21286921,cg13925011,cg19942256
chr1	112530715	112534642	2	Yes	promoter	KCND3,RP11-88H9.2	No	20	cg06870740,cg10283737,cg16701939,cg13059411,cg02951738,cg22434989,cg18807049,cg10937591,cg21583850,cg17517865,cg22957381,cg10635194,cg26330135,cg00717482,cg11947011,cg19367540,cg00852622,cg09276363,cg07723921,cg15211908	21	cg06870740,cg10283737,cg16701939,cg13059411,cg03690645,cg02951738,cg22434989,cg01650919,cg21348554,cg18807049,cg10937591,cg21583850,cg14762507,cg17517865,cg22957381,cg10635194,cg26330135,cg00852622,cg09276363,cg07723921,cg15211908
chr1	113043932	113045808	3	Yes	gene body	WNT2B	Yes	4	cg04154465,cg19510038,cg11006812,cg16139749	5	cg01257529,cg04154465,cg19510038,cg11006812,cg16139749
chr1	113049661	113053792	2	Yes	promoter	WNT2B	No	15	cg25320499,cg07005055,cg11806528,cg08739433,cg27181253,cg14186963,cg23923856,cg19722720,cg21454231,cg07974622,cg21998473,cg07639650,cg24525509,cg24334335,cg11140897	17	cg25320499,cg07005055,cg11806528,cg08739433,cg27181253,cg14186963,cg23923856,cg19722720,cg24260714,cg07454320,cg21454231,cg07974622,cg21998473,cg07639650,cg24525509,cg24334335,cg11140897
chr1	113246712	113249825	3	Yes	promoter	RHOC	No	3	cg12627700,cg16743781,cg11835347	4	cg24087884,cg12627700,cg11835347,cg17175958
chr1	113255852	113259574	3	Yes	promoter	PPM1J,RP11-426L16.9	No	13	cg08738562,cg09188322,cg04828892,cg00093220,cg13419927,cg13988606,cg03602124,cg26109009,cg21582570,cg12687922,cg25314885,cg21417510,cg01138839	15	cg08738562,cg09188322,cg04828892,cg00093220,cg13419927,cg13988606,cg03602124,cg19833011,cg26109009,cg10751131,cg21582570,cg12687922,cg25314885,cg01138839,cg11016299
chr1	113264936	113266787	3	Yes	gene body	FAM19A3	No	7	cg03918071,cg09126636,cg16255156,cg10806711,cg05243438,cg21286782,cg07023459	5	cg03918071,cg09126636,cg16255156,cg10806711,cg07023459
chr1	113933352	113935577	3	Yes	promoter	MAGI3	No	6	cg19510626,cg16769442,cg26030610,cg06802056,cg18539474,cg11716640	8	cg19510626,cg16769442,cg26030610,cg06802056,cg24576534,cg18848478,cg18539474,cg11716640
chr1	114692595	114698350	1	Yes	promoter	SYT6	No	22	cg12728020,cg26426632,cg00764109,cg06620092,cg12097117,cg12804010,cg19874857,cg19901801,cg15976388,cg08883066,cg22646710,cg03514545,cg01567634,cg21920775,cg05368341,cg09177131,cg19304150,cg27304110,cg25201881,cg08105352,cg01974027,cg23443003	28	cg12728020,cg00764109,cg06620092,cg12097117,cg12804010,cg19874857,cg19901801,cg15976388,cg08883066,cg22646710,cg03514545,cg01567634,cg10595388,cg07283281,cg21920775,cg14456207,cg05368341,cg09177131,cg19304150,cg27304110,cg25201881,cg08105352,cg07711890,cg09942364,cg22531105,cg01974027,cg23443003,cg27235313
chr1	114888163	114889902	3	No	intergenic	NA	No	5	cg14252954,cg00337821,cg25720121,cg24640440,cg02157078	6	cg14252954,cg00337821,cg25720121,cg12990080,cg24640440,cg02157078
chr1	115630793	115633546	1	Yes	promoter	TSPAN2	No	11	cg11424375,cg25102417,cg17131030,cg27442412,cg06043114,cg15685943,cg15558982,cg01522456,cg03614513,cg13797285,cg09811183	11	cg17131030,cg27442412,cg06043114,cg20757322,cg15685943,cg15558982,cg14867388,cg01522456,cg03614513,cg13797285,cg09811183
chr1	115879308	115881956	3	Yes	promoter	NGF	No	12	cg02987481,cg25067242,cg21184174,cg22354782,cg03962691,cg13613280,cg13804058,cg09008705,cg22572159,cg27635069,cg19313043,cg21420366	11	cg02987481,cg25067242,cg21184174,cg22354782,cg03962691,cg13613280,cg05837493,cg09008705,cg08781532,cg27635069,cg21420366
chr1	116370015	116372495	3	Yes	intergenic	NA	Yes	9	cg23952578,cg17481936,cg21852513,cg19356191,cg15654259,cg24660670,cg27452217,cg26156256,cg22374525	8	cg23952578,cg17481936,cg21852513,cg25176901,cg15654259,cg24660670,cg27452217,cg22374525
chr1	116379599	116383651	1	Yes	promoter	NHLH2	No	18	cg02030187,cg23202177,cg17873750,cg17900495,cg04475069,cg12633890,cg02126788,cg21646199,cg24106636,cg00065905,cg18438853,cg24999518,cg14733680,cg00960552,cg25341338,cg25979559,cg21863110,cg11071926	14	cg02030187,cg23202177,cg17873750,cg17900495,cg04475069,cg12633890,cg02126788,cg21646199,cg24106636,cg18438853,cg24999518,cg25341338,cg21863110,cg11071926
chr1	116709701	116711994	1	Yes	intergenic	NA	No	10	cg01824919,cg17933722,cg27527108,cg16003256,cg04151062,cg10376286,cg02855836,cg00969087,cg02452639,cg04722605	10	cg01824919,cg17933722,cg27527108,cg16003256,cg04151062,cg10376286,cg02855836,cg00969087,cg02452639,cg04722605
chr1	117207381	117210282	3	Yes	promoter	IGSF3	No	6	cg16644764,cg12205047,cg18943969,cg00157755,cg04140633,cg00178661	11	cg16644764,cg12205047,cg18943969,cg12666334,cg05402479,cg00157755,cg17504789,cg25333797,cg03243485,cg04140633,cg00178661
chr1	117908009	117909543	1	Yes	promoter	MAN1A2,RP11-188D8.1	No	4	cg03140827,cg22947679,cg18389062,cg20383390	3	cg22947679,cg18389062,cg20383390
chr1	118148541	118150962	3	Yes	promoter	AL157902.3,FAM46C	No	8	cg23098693,cg02854554,cg15576859,cg06087298,cg14545899,cg00466488,cg06707718,cg18223314	7	cg23098693,cg02854554,cg15576859,cg03255241,cg14545899,cg00466488,cg06707718
chr1	119525714	119533435	2	Yes	promoter	TBX15	Yes	46	cg23371746,cg00466334,cg02362103,cg22820316,cg03942051,cg08942939,cg12664119,cg26272623,cg25340966,cg05940231,cg10703826,cg07892597,cg24884142,cg14565725,cg24842086,cg03760839,cg21295088,cg14415885,cg25755283,cg24475782,cg27262412,cg21392341,cg04550737,cg00173504,cg23588217,cg02177231,cg03989260,cg09260773,cg05363616,cg27517681,cg15513743,cg07820868,cg06204711,cg21170796,cg04707332,cg10145246,cg1…	44	cg23371746,cg00466334,cg02362103,cg03942051,cg12664119,cg26272623,cg25507958,cg25340966,cg05940231,cg10703826,cg07892597,cg24884142,cg14565725,cg24842086,cg03760839,cg21295088,cg14415885,cg25755283,cg24475782,cg27262412,cg21392341,cg14272433,cg04550737,cg00173504,cg23588217,cg02177231,cg09260773,cg05363616,cg27517681,cg07820868,cg06204711,cg21170796,cg04707332,cg14175690,cg26104752,cg13080379,cg2…
chr1	119541518	119545272	2	Yes	promoter	RP4-712E4.1,RP4-712E4.2	No	19	cg06764239,cg20247486,cg03994465,cg10589949,cg17147211,cg03216846,cg01912586,cg17592360,cg01439876,cg02063759,cg01550055,cg12659883,cg27268556,cg26856924,cg00667647,cg24434800,cg13107768,cg25386234,cg26570165	20	cg06764239,cg20247486,cg03994465,cg11905982,cg10589949,cg17147211,cg03216846,cg01912586,cg17592360,cg11649715,cg01439876,cg02063759,cg01550055,cg12659883,cg27268556,cg26856924,cg00667647,cg24434800,cg25386234,cg26570165
chr1	119868026	119870896	3	Yes	promoter	RP11-418J17.3,RP5-834N19.1	No	5	cg26559808,cg04784699,cg23609985,cg22230604,cg21837207	8	cg26559808,cg26506316,cg01085347,cg23609985,cg22230604,cg01663821,cg14181008,cg21837207
chr1	121137345	121139353	2	Yes	promoter	AL592494.5,RP11-343N15.1	No	6	cg18151674,cg05783455,cg16511983,cg07423602,cg14906734,cg27260418	6	cg05783455,cg16511983,cg26486675,cg07423602,cg14906734,cg27260418
chr1	144593485	144594899	2	Yes	promoter	RP11-640M9.2	No	5	cg17142105,cg09127406,cg06525145,cg16519660,cg03603114	8	cg17142105,cg09127406,cg06525145,cg09853793,cg03603114,cg12512196,cg01476456,cg14768848
chr1	144928265	144932121	3	Yes	promoter	PDE4DIP	No	9	cg26805238,cg04885673,cg13921652,cg24808412,cg03866074,cg12594911,cg02854922,cg21608225,cg12633998	11	cg26805238,cg04885673,cg13921652,cg24808412,cg04804820,cg03866074,cg12594911,cg01215495,cg02854922,cg21608225,cg12633998
chr1	145038124	145041327	2	Yes	promoter	PDE4DIP	No	8	cg06851240,cg25340674,cg11955541,cg23977954,cg10822149,cg11244813,cg01016851,cg16058880	15	cg06851240,cg26568223,cg19552031,cg25340674,cg00885504,cg03012986,cg11955541,cg11984353,cg14324736,cg23977954,cg10822149,cg11244813,cg01016851,cg16058880,cg16252872
chr1	145074435	145076993	2	Yes	promoter	PDE4DIP	No	5	cg03933321,cg21047206,cg11935147,cg19084726,cg18089019	6	cg03933321,cg21047206,cg26078733,cg11935147,cg19084726,cg18089019
chr1	145139091	145140352	3	Yes	intergenic	NA	No	4	cg11721361,cg13300623,cg15063753,cg13238881	4	cg11721361,cg13300623,cg15063753,cg13238881
chr1	145209305	145211300	1	Yes	promoter	NOTCH2NL,RP11-458D21.5	No	3	cg11046393,cg15451735,cg02963198	2	cg11046393,cg02963198
chr1	145414015	145416497	3	Yes	promoter	HFE2	No	4	cg15553912,cg14036143,cg19624849,cg00953211	3	cg14036143,cg19624849,cg00953211
chr1	145469568	145475513	3	Yes	promoter	ANKRD34A,POLR3GL	No	25	cg10976961,cg16871828,cg26144437,cg04886407,cg01229562,cg18280463,cg10178263,cg13051071,cg13947666,cg04816302,cg21421098,cg09752264,cg08920748,cg26251123,cg08916374,cg19913118,cg26935102,cg23606286,cg07036775,cg03852219,cg19413110,cg06617136,cg13110034,cg15577575,cg12222699	26	cg10976961,cg26144437,cg04886407,cg01229562,cg18280463,cg10178263,cg13947666,cg04816302,cg21421098,cg09752264,cg08920748,cg08916374,cg19913118,cg26935102,cg23606286,cg23310995,cg06670459,cg20713319,cg07036775,cg03852219,cg19413110,cg04953165,cg06617136,cg13110034,cg25416927,cg12222699
chr1	145476216	145478788	3	Yes	promoter	LIX1L	No	12	cg04846710,cg05598845,cg23044488,cg06802841,cg01780466,cg19930199,cg03418289,cg27236173,cg21396211,cg17949451,cg21332946,cg22026450	12	cg04846710,cg05598845,cg06802841,cg01780466,cg19930199,cg03418289,cg23347009,cg27236173,cg21396211,cg17949451,cg21332946,cg21501179
chr1	145561778	145563783	3	No	gene body	ANKRD35	No	2	cg01000615,cg11187916	3	cg08757176,cg01000615,cg11187916
chr1	146543433	146545349	3	Yes	intergenic	NA	No	6	cg16237891,cg10124710,cg01701555,cg23019889,cg17856063,cg26152038	7	cg05520336,cg16237891,cg10124710,cg01701555,cg23019889,cg17856063,cg26152038
chr1	146554943	146557546	1	Yes	intergenic	NA	No	8	cg24053514,cg00693978,cg16277128,cg24856140,cg16409339,cg25311637,cg00112042,cg24853868	8	cg24053514,cg00693978,cg16277128,cg24856140,cg16409339,cg25311637,cg00112042,cg24853868
chr1	147057568	147059827	3	No	gene body	BCL9	No	1	cg23014759	1	cg23014759
chr1	147780739	147783238	3	Yes	intergenic	NA	No	9	cg01946451,cg03242265,cg13067553,cg13392957,cg23206461,cg19265480,cg18140268,cg20569940,cg21683069	10	cg01946451,cg03242265,cg13067553,cg13392957,cg23206461,cg19265480,cg18140268,cg20569940,cg21683069,cg23403636
chr1	147788973	147791813	1	Yes	intergenic	NA	Yes	9	cg23989012,cg18020955,cg06804778,cg25200152,cg07236666,cg10537450,cg06991392,cg00171578,cg17149103	9	cg23989012,cg18020955,cg06804778,cg25200152,cg07236666,cg10537450,cg06991392,cg00171578,cg17149103
chr1	147824516	147827907	3	Yes	intergenic	NA	Yes	6	cg10486098,cg12099459,cg19639898,cg06216408,cg13502125,cg15818208	6	cg10486098,cg12099459,cg19639898,cg06216408,cg13502125,cg15818208
chr1	148555798	148557226	2	Yes	promoter	NBPF15	No	5	cg08478627,cg00863986,cg04186622,cg06616806,cg18376472	7	cg27217159,cg22476963,cg00863986,cg09882461,cg04186622,cg06616806,cg18376472
chr1	148901241	148902890	2	Yes	intergenic	NA	No	2	cg05650810,cg01925498	1	cg01925498
chr1	148927382	148931969	3	No	promoter	RP11-14N7.2	No	9	cg05158293,cg00097790,cg25143706,cg25095697,cg12732715,cg01907476,cg10642094,cg11789062,cg00324257	12	cg05158293,cg11629355,cg00097790,cg25143706,cg25095697,cg12732715,cg01907476,cg10642094,cg11789062,cg16790144,cg00324257,cg20626321
chr1	149192085	149195197	3	No	promoter	RNVU1-17	No	7	cg18395499,cg06059680,cg00780971,cg06927217,cg09011576,cg03539016,cg00977827	10	cg27212576,cg18395499,cg11772310,cg06059680,cg14320736,cg00780971,cg06927217,cg09011576,cg03539016,cg00977827
chr1	149285523	149288859	2	Yes	promoter	RNU1-143P,RP11-403I13.7,RP11-403I13.8	No	9	cg23664334,cg06512579,cg11528594,cg09460082,cg10242032,cg24854435,cg19612827,cg15472739,cg18193268	8	cg23664334,cg11528594,cg09460082,cg12780133,cg10242032,cg24854435,cg19612827,cg01758747
chr1	149332502	149334739	1	Yes	intergenic	NA	No	4	cg03401379,cg12380743,cg06626847,cg11411203	4	cg03401379,cg12380743,cg06626847,cg11411203
chr1	149717951	149720307	1	Yes	promoter	RP11-353N4.5	No	5	cg00017221,cg20300343,cg16714755,cg20806427,cg04601296	5	cg00017221,cg20300343,cg16714755,cg20806427,cg04601296
chr1	150120651	150122115	1	Yes	promoter	PLEKHO1	No	5	cg14601938,cg17327184,cg12072973,cg01570589,cg24437535	11	cg22122056,cg14601938,cg19583621,cg17327184,cg12072973,cg01570589,cg24437535,cg07759237,cg11329713,cg12981196,cg18696449
chr1	150253833	150256395	1	Yes	promoter	C1orf51	No	12	cg03960066,cg09563216,cg00764612,cg01464052,cg10055771,cg21715963,cg06982544,cg07916884,cg11207983,cg21831898,cg07702853,cg15642292	16	cg18529259,cg03960066,cg09563216,cg00764612,cg06259248,cg18487723,cg01464052,cg20099340,cg10055771,cg24978679,cg21715963,cg06982544,cg07916884,cg21831898,cg07702853,cg15642292
chr1	150520794	150523261	3	Yes	promoter	ADAMTSL4,AL356356.1	No	14	cg24441324,cg14037218,cg12974394,cg16559275,cg11395536,cg15823180,cg04122467,cg00785522,cg25410842,cg14938410,cg02362686,cg09229181,cg04863713,cg09622957	15	cg24441324,cg05986111,cg14037218,cg03279503,cg16559275,cg11395536,cg15823180,cg04122467,cg00785522,cg25410842,cg14938410,cg02362686,cg09229181,cg04863713,cg09622957
chr1	151103020	151106508	3	Yes	promoter	RP11-68I18.10,SEMA6C	No	7	cg09143801,cg02698576,cg07371589,cg04065086,cg16399136,cg19706516,cg07119434	14	cg01159236,cg23280536,cg15336312,cg25583253,cg01990592,cg09143801,cg07371589,cg04736556,cg23010096,cg04065086,cg16399136,cg19706516,cg07119434,cg03797628
chr1	151116951	151120363	1	Yes	promoter	SEMA6C	No	14	cg09185948,cg01958916,cg06179645,cg23228418,cg16488304,cg27228276,cg06035839,cg00427454,cg25820693,cg04494683,cg24847154,cg05622647,cg13331550,cg26331172	15	cg09185948,cg01958916,cg06179645,cg23228418,cg16488304,cg27228276,cg03090136,cg06035839,cg04494683,cg24847154,cg05622647,cg13331550,cg26331172,cg10267515,cg15786168
chr1	151809109	151813626	1	Yes	promoter	AL450992.2,C2CD4D,Y_RNA	Yes	15	cg04489012,cg12233379,cg24425838,cg08703872,cg00036347,cg24051554,cg12749132,cg04296699,cg10781408,cg05021743,cg15015892,cg22604218,cg19255477,cg26426745,cg02493846	15	cg04489012,cg12233379,cg24425838,cg08703872,cg00036347,cg24051554,cg12749132,cg04296699,cg10781408,cg05021743,cg15015892,cg22604218,cg19255477,cg26426745,cg02493846
chr1	152079640	152085941	2	Yes	promoter	TCHH	No	15	cg00584000,cg20795569,cg18287591,cg05642734,cg24880024,cg24645670,cg10234068,cg05464302,cg03438305,cg04986781,cg05523911,cg04938315,cg14661959,cg15973171,cg16689481	14	cg00584000,cg20795569,cg18287591,cg05642734,cg24645670,cg10234068,cg05464302,cg03438305,cg04986781,cg05523911,cg04938315,cg14661959,cg15973171,cg16689481
chr1	153232903	153235252	3	No	promoter	LOR	No	6	cg07387429,cg10228283,cg11534293,cg21860629,cg08611411,cg05001111	8	cg07387429,cg10228283,cg11534293,cg21860629,cg08611411,cg27020649,cg04645211,cg05001111
chr1	153507367	153509406	3	Yes	promoter	S100A6	No	15	cg08106792,cg24375627,cg10959711,cg22792473,cg00419564,cg16564710,cg08644993,cg09413557,cg20672465,cg01434197,cg13112903,cg06872500,cg04998420,cg01910639,cg16291048	15	cg24375627,cg10959711,cg10454287,cg22792473,cg00419564,cg16564710,cg08644993,cg14802247,cg09413557,cg01434197,cg13112903,cg06872500,cg04998420,cg01910639,cg16291048
chr1	153649872	153653632	3	Yes	promoter	NPR1	No	18	cg12604435,cg14178748,cg26246928,cg05511392,cg23098020,cg04484579,cg07961659,cg24054938,cg06444984,cg11971027,cg07299819,cg19751545,cg07240937,cg16654806,cg00500892,cg15131647,cg21472315,cg22318989	20	cg12604435,cg06559326,cg00395056,cg27289196,cg14178748,cg26246928,cg05511392,cg04484579,cg07961659,cg24054938,cg06444984,cg21121888,cg11971027,cg07299819,cg19751545,cg07240937,cg16654806,cg15131647,cg21472315,cg22318989
chr1	154324403	154326548	1	No	intergenic	NA	No	3	cg25262656,cg23025942,cg22708508	3	cg25262656,cg23025942,cg22708508
chr1	154376936	154380270	3	Yes	promoter	IL6R,RP11-350G8.5	No	17	cg04437762,cg09257526,cg07721365,cg23026211,cg07344147,cg24312771,cg26822854,cg03957204,cg04185861,cg23890158,cg25853020,cg11078914,cg07318287,cg23609982,cg01435678,cg24346686,cg04715245	17	cg10869615,cg09257526,cg07721365,cg23026211,cg07344147,cg24312771,cg03957204,cg25853020,cg11078914,cg05027779,cg15230320,cg07318287,cg23609982,cg01435678,cg24346686,cg08413590,cg04715245
chr1	154473414	154475701	2	Yes	promoter	SHE,TDRD10	No	11	cg24889998,cg19360104,cg18081940,cg02457680,cg05637536,cg25460143,cg02856953,cg19970699,cg16899920,cg16683920,cg07911225	10	cg24889998,cg18081940,cg02457680,cg05637536,cg02856953,cg19970699,cg16899920,cg07911225,cg10411850,cg14176099
chr1	154839017	154843478	3	No	promoter	KCNN3	No	12	cg06950309,cg17733702,cg03434847,cg10946435,cg22859423,cg27332243,cg11902458,cg06742440,cg01963297,cg16680214,cg09359103,cg06221963	16	cg06950309,cg17733702,cg03434847,cg10946435,cg22859423,cg27332243,cg20233436,cg11902458,cg06742440,cg01963297,cg19894091,cg20543366,cg03003668,cg16680214,cg09359103,cg06221963
chr1	155022567	155025429	3	Yes	promoter	ADAM15	No	12	cg10249703,cg12719510,cg03379131,cg26232102,cg22900705,cg04018299,cg15694180,cg16095542,cg23890506,cg26310319,cg00958409,cg24935121	13	cg10249703,cg12719510,cg03379131,cg22900705,cg18613283,cg04018299,cg24964137,cg15694180,cg16095542,cg23890506,cg00958409,cg16830523,cg24935121
chr1	155034281	155036391	1	Yes	promoter	EFNA3,EFNA4	No	16	cg14605134,cg20330021,cg00386338,cg23647530,cg19811864,cg15843385,cg08664617,cg20140173,cg10062530,cg16905506,cg11491247,cg00585901,cg15141467,cg18832152,cg13069100,cg27576241	16	cg14605134,cg20330021,cg00386338,cg19811864,cg15843385,cg08664617,cg20140173,cg10062530,cg00589492,cg16905506,cg11491247,cg00585901,cg15141467,cg18832152,cg13069100,cg27576241
chr1	155042289	155044978	3	Yes	gene body	EFNA3	No	10	cg08947894,cg27166581,cg22678754,cg03006527,cg10196558,cg16269418,cg16171526,cg18943693,cg23414228,cg00103785	8	cg08947894,cg03006527,cg06415923,cg10196558,cg16269418,cg18943693,cg00103785,cg03706283
chr1	155050476	155055922	2	Yes	promoter	EFNA3	Yes	21	cg10516701,cg08185345,cg27045062,cg13096820,cg22988237,cg12812167,cg00267713,cg00449821,cg05788417,cg18828883,cg16257681,cg11869514,cg12741345,cg11688696,cg08242010,cg06787675,cg05813084,cg17749735,cg10954985,cg10143807,cg25745642	21	cg10516701,cg08185345,cg27045062,cg13096820,cg22988237,cg12812167,cg00267713,cg18828883,cg16257681,cg11869514,cg12741345,cg11688696,cg08242010,cg06787675,cg05813084,cg17749735,cg15197525,cg10954985,cg10143807,cg22744899,cg25745642
chr1	155096989	155103624	3	Yes	promoter	EFNA1	Yes	19	cg14612733,cg06639488,cg07207669,cg26809127,cg03231024,cg04296885,cg24526499,cg16273215,cg26335527,cg13298932,cg08250444,cg25723933,cg05082095,cg26667821,cg05641351,cg10861146,cg21609826,cg02992639,cg00149684	20	cg14612733,cg06639488,cg07207669,cg14425448,cg26809127,cg03231024,cg04296885,cg24526499,cg26335527,cg15372870,cg13298932,cg08250444,cg05082095,cg26667821,cg19540825,cg05641351,cg10861146,cg21609826,cg12956369,cg00149684
chr1	155263894	155266260	3	Yes	gene body	PKLR	No	6	cg09037777,cg01971813,cg25651783,cg11736940,cg03314840,cg04897644	6	cg09037777,cg01971813,cg25651783,cg11736940,cg09498080,cg04897644
chr1	155290203	155292777	3	Yes	promoter	RUSC1,RUSC1-AS1	No	16	cg16565161,cg09133422,cg10057065,cg12577372,cg26876647,cg22234962,cg08264805,cg24544490,cg24006126,cg19516515,cg22877509,cg08574629,cg08170787,cg15676040,cg15113766,cg24547565	17	cg16565161,cg10057065,cg12577372,cg09854449,cg26876647,cg22234962,cg08264805,cg24544490,cg24006126,cg01032200,cg19516515,cg22877509,cg08574629,cg08170787,cg15676040,cg23190823,cg24547565
chr1	156338424	156339914	3	Yes	promoter	RHBG	No	8	cg17820306,cg06216293,cg15120454,cg03917423,cg17935233,cg07702888,cg13423770,cg24473450	11	cg17820306,cg06216293,cg15120454,cg03917423,cg24813314,cg17935233,cg02603168,cg07702888,cg13423770,cg24473450,cg19543581
chr1	156357276	156359120	3	Yes	promoter	RP11-139I14.2	No	11	cg15575683,cg20433275,cg23842796,cg12062819,cg09989644,cg24361162,cg21966075,cg10434261,cg21297493,cg17966560,cg22353551	11	cg15575683,cg20433275,cg23842796,cg09989644,cg24361162,cg21966075,cg10434261,cg21297493,cg17966560,cg22353551,cg13531446
chr1	156389201	156392998	2	Yes	promoter	MIR9-1	No	11	cg09793584,cg06609427,cg10778599,cg13149127,cg13491296,cg09346118,cg26371731,cg20582655,cg07234865,cg09938227,cg26073933	13	cg00390150,cg22630361,cg09793584,cg06609427,cg10778599,cg13149127,cg13491296,cg15270145,cg26371731,cg20582655,cg07234865,cg09938227,cg26073933
chr1	156593337	156596106	2	Yes	promoter	HAPLN2	No	10	cg25010870,cg00325919,cg01079164,cg24047377,cg01574673,cg10640435,cg24892382,cg25139187,cg18142940,cg01561528	13	cg25010870,cg00325919,cg01079164,cg24047377,cg01574673,cg10640435,cg24892382,cg25139187,cg18142940,cg12567310,cg01561528,cg00735267,cg24268531
chr1	156610786	156613161	3	Yes	promoter	BCAN,RP11-284F21.9	No	9	cg22439792,cg09182138,cg21475402,cg20270188,cg02599463,cg14423692,cg12664038,cg02609880,cg19321979	11	cg09182138,cg21475402,cg13371260,cg20270188,cg02950416,cg23725223,cg02599463,cg14423692,cg12664038,cg02609880,cg19321979
chr1	156626135	156627985	3	Yes	gene body	BCAN,RP11-284F21.7	No	7	cg08465120,cg13950948,cg22168255,cg23657274,cg06929846,cg00765922,cg05888917	7	cg08465120,cg13950948,cg22168255,cg06929846,cg00765922,cg05888917,cg27274878
chr1	156660015	156662238	3	No	promoter	RP11-66D17.3	No	1	cg16736018	5	cg05575544,cg24275948,cg03287757,cg22885525,cg16736018
chr1	156672755	156675480	3	Yes	promoter	CRABP2	No	6	cg15119100,cg27493997,cg24598126,cg03734660,cg03003689,cg18793215	7	cg15119100,cg27493997,cg24598126,cg03734660,cg03003689,cg18793215,cg11642763
chr1	156782782	156784566	1	Yes	promoter	NTRK1	No	7	cg00577202,cg27660165,cg05628567,cg02312326,cg05364122,cg22808351,cg27530136	8	cg07522647,cg00577202,cg27660165,cg05628567,cg02312326,cg05364122,cg22808351,cg27530136
chr1	156814367	156816209	2	Yes	gene body	INSRR,NTRK1	No	8	cg08474334,cg00008446,cg16438688,cg13574390,cg00242627,cg11793699,cg08728702,cg24845595	7	cg08474334,cg00008446,cg16438688,cg00242627,cg11793699,cg08728702,cg24845595
chr1	156817870	156819428	3	Yes	gene body	INSRR,NTRK1	No	7	cg04704219,cg04415780,cg03390245,cg01357370,cg03888033,cg04104526,cg02619408	6	cg04704219,cg04415780,cg03390245,cg01357370,cg03888033,cg02619408
chr1	156828268	156831587	2	Yes	promoter	INSRR,NTRK1	No	12	cg19237923,cg09873405,cg26428727,cg10981464,cg03055346,cg20673279,cg03438943,cg12995941,cg18534318,cg18649438,cg24438909,cg26687119	19	cg19237923,cg09873405,cg09106574,cg04694271,cg06655330,cg26428727,cg10981464,cg03055346,cg20673279,cg03438943,cg12995941,cg18534318,cg18649438,cg25399158,cg27642691,cg02190807,cg21669590,cg26733795,cg24438909
chr1	156861354	156864562	3	Yes	promoter	PEAR1	No	9	cg27577907,cg02264567,cg06188545,cg11594940,cg20948486,cg02671646,cg06845943,cg22396033,cg09356509	13	cg27577907,cg02264567,cg06188545,cg08495825,cg09785555,cg12167245,cg11594940,cg20948486,cg06675877,cg02671646,cg06845943,cg09356509,cg11492125
chr1	156889575	156891226	2	Yes	promoter	LRRC71	No	8	cg06226534,cg16268769,cg04113693,cg16489895,cg06360543,cg11707445,cg18863922,cg06069154	8	cg06226534,cg16268769,cg02778613,cg04113693,cg06360543,cg11707445,cg18863922,cg06069154
chr1	156892592	156895252	2	Yes	gene body	LRRC71	No	6	cg19022717,cg09858604,cg06374307,cg24638326,cg26614154,cg05270291	4	cg19022717,cg09858604,cg06374307,cg24638326
chr1	156896576	156898289	3	Yes	gene body	LRRC71	No	7	cg02453208,cg27317004,cg16020069,cg22402053,cg02237987,cg20298273,cg25149551	7	cg02453208,cg27317004,cg16020069,cg22402053,cg02237987,cg20298273,cg25149551
chr1	158082415	158083432	3	Yes	intergenic	NA	No	4	cg04877901,cg07251197,cg18760621,cg11734710	5	cg04877901,cg07251197,cg18760621,cg11734710,cg11162764
chr1	158146992	158148521	3	Yes	intergenic	NA	Yes	4	cg05843457,cg10963061,cg12460133,cg10516993	5	cg03232804,cg05843457,cg10963061,cg12460133,cg10516993
chr1	158149746	158151993	3	Yes	promoter	CD1D	No	9	cg05338433,cg15613014,cg25683325,cg19595835,cg04360049,cg13844591,cg12124922,cg24698727,cg24432768	8	cg05338433,cg15613014,cg25683325,cg19595835,cg04360049,cg24698727,cg24432768,cg17399166
chr1	159823401	159825507	3	Yes	promoter	C1orf204	No	9	cg07961479,cg10839385,cg15063322,cg25820858,cg09369381,cg15842317,cg11282564,cg08920121,cg15549973	10	cg07961479,cg10839385,cg15063322,cg25820858,cg09369381,cg23750265,cg15842317,cg11282564,cg08920121,cg15549973
chr1	160039182	160041372	3	Yes	promoter	KCNJ10	No	13	cg02371464,cg27520170,cg26258944,cg07135388,cg17495154,cg05101920,cg25771897,cg26681210,cg10441013,cg15548046,cg12163730,cg04975598,cg05768141	12	cg27520170,cg26258944,cg17495154,cg05101920,cg25771897,cg26681210,cg25290459,cg00621608,cg10441013,cg15548046,cg12163730,cg04975598
chr1	161227825	161229694	3	Yes	promoter	PCP4L1	No	7	cg16172549,cg01794501,cg07369190,cg11912330,cg27223727,cg10775792,cg01425967	9	cg10503136,cg16172549,cg01794501,cg07369190,cg11912330,cg27223727,cg14496016,cg10775792,cg01425967
chr1	161408797	161410670	2	Yes	intergenic	NA	No	4	cg22730047,cg15358701,cg00975746,cg00549451	4	cg22730047,cg15358701,cg00975746,cg00549451
chr1	161441931	161444169	2	Yes	intergenic	NA	No	2	cg09846895,cg08527195	2	cg09846895,cg08527195
chr1	161493138	161495600	2	Yes	promoter	HSPA6	No	8	cg03524848,cg07392520,cg17405122,cg17887793,cg23691642,cg00396991,cg01550473,cg00769882	12	cg03524848,cg07392520,cg17405122,cg06526344,cg17887793,cg23691642,cg00396991,cg01550473,cg03495350,cg21823025,cg06692795,cg00769882
chr1	161695151	161698167	1	Yes	promoter	FCRLB	No	12	cg07385423,cg17905084,cg22389730,cg01194901,cg05392764,cg22854981,cg15642792,cg25894839,cg21864996,cg26009555,cg18450905,cg14210287	12	cg07385423,cg17905084,cg22389730,cg01194901,cg05392764,cg22854981,cg15642792,cg25894839,cg21864996,cg18450905,cg14210287,cg09387559
chr1	161992511	161994801	1	Yes	promoter	OLFML2B	No	14	cg12585910,cg19130550,cg08841167,cg10810183,cg10505415,cg03392673,cg24623497,cg17944328,cg21205071,cg11067756,cg06775072,cg20172280,cg09862072,cg07122893	13	cg19130550,cg08841167,cg10810183,cg10505415,cg24623497,cg17944328,cg24167624,cg21205071,cg11067756,cg06775072,cg20172280,cg09862072,cg07122893
chr1	164289711	164291350	3	Yes	intergenic	NA	Yes	8	cg12739454,cg15905435,cg07789132,cg24862510,cg19827223,cg24043916,cg23619357,cg09871685	8	cg12739454,cg15905435,cg24862510,cg19827223,cg24043916,cg23619357,cg09871685,cg11767291
chr1	165203899	165206060	3	Yes	gene body	LMX1A	Yes	15	cg16524049,cg16967640,cg05099491,cg23689712,cg06872705,cg27590049,cg15713630,cg19317413,cg17716664,cg09118258,cg00174428,cg23049291,cg09317884,cg18206481,cg22627981	14	cg16524049,cg16967640,cg05099491,cg06872705,cg27590049,cg15713630,cg19317413,cg17716664,cg09118258,cg00174428,cg23049291,cg09317884,cg18206481,cg22627981
chr1	165320150	165326795	2	Yes	promoter	LMX1A	Yes	26	cg02054776,cg02361878,cg23971170,cg09069138,cg04351049,cg09248345,cg02847948,cg08606911,cg27440715,cg08460041,cg07686479,cg24650501,cg14662355,cg09806671,cg08291024,cg03887163,cg17787084,cg10815625,cg19924619,cg26522592,cg10315533,cg27636676,cg14417498,cg07135032,cg26337312,cg05127450	33	cg22937563,cg02054776,cg02361878,cg23971170,cg26436962,cg03077645,cg02885925,cg10623918,cg09069138,cg04351049,cg09248345,cg11494337,cg02847948,cg09748853,cg08606911,cg27440715,cg08460041,cg07686479,cg24650501,cg09806671,cg27361091,cg08291024,cg03887163,cg17787084,cg10815625,cg19924619,cg26522592,cg10315533,cg27636676,cg14417498,cg07135032,cg26337312,cg05127450
chr1	165344454	165346728	3	No	intergenic	NA	Yes	4	cg27447874,cg24596729,cg25319791,cg18395632	4	cg27447874,cg24596729,cg25319791,cg18395632
chr1	165412549	165415145	3	No	promoter	RXRG	No	12	cg17514495,cg12404281,cg08623787,cg01913568,cg11717564,cg22675486,cg13901501,cg17885806,cg10364513,cg08905496,cg00349776,cg07163547	14	cg17514495,cg12404281,cg14489205,cg08623787,cg19153567,cg01913568,cg11717564,cg22675486,cg13901501,cg17885806,cg10364513,cg08905496,cg00349776,cg07163547
chr1	166133756	166137102	3	Yes	promoter	FAM78B,RP11-9L18.3	No	18	cg03272326,cg19708554,cg14153737,cg06976312,cg16118529,cg19864490,cg18166862,cg26247215,cg14169158,cg16403669,cg21762820,cg22629111,cg02229993,cg07198881,cg09279615,cg16596102,cg21868774,cg10829458	21	cg13282809,cg03272326,cg19708554,cg14153737,cg06976312,cg16118529,cg19864490,cg18166862,cg18048954,cg26247215,cg13602641,cg08089369,cg22758021,cg07761284,cg16403669,cg21762820,cg22629111,cg02229993,cg09279615,cg16596102,cg10829458
chr1	166943039	166945894	3	Yes	promoter	ILDR2	Yes	6	cg22603542,cg15965055,cg11503720,cg03758693,cg18323210,cg08348962	10	cg15809116,cg22603542,cg15965055,cg11503720,cg03758693,cg24340661,cg18323210,cg08348962,cg03841051,cg12850103
chr1	167407982	167409502	3	Yes	gene body	CD247	No	7	cg11958495,cg12184421,cg06900257,cg12446199,cg02648847,cg21161394,cg01396157	8	cg11958495,cg12184421,cg06900257,cg12446199,cg02648847,cg21161394,cg12389252,cg01396157
chr1	167423465	167426004	3	Yes	gene body	CD247	Yes	8	cg14841337,cg16127719,cg18786479,cg04062187,cg21445541,cg00628228,cg22788606,cg12480903	10	cg07880590,cg14841337,cg16127719,cg18786479,cg04062187,cg21445541,cg00628228,cg18953778,cg22788606,cg12480903
chr1	167598410	167601620	3	Yes	promoter	RCSD1,RP3-455J7.4	No	11	cg25765104,cg07751287,cg18800085,cg02079933,cg00450304,cg14046986,cg04259326,cg12336540,cg01782826,cg04275362,cg15676719	17	cg09755770,cg25765104,cg07751287,cg18800085,cg02079933,cg00450304,cg25259804,cg06106423,cg14046986,cg15864502,cg23899533,cg14757388,cg04259326,cg12336540,cg01782826,cg04275362,cg15676719
chr1	167681691	167684019	3	Yes	intergenic	NA	Yes	10	cg10225325,cg16925766,cg04890457,cg17446970,cg20491991,cg20432671,cg27582007,cg25726080,cg15464821,cg21209859	8	cg10225325,cg16925766,cg04890457,cg20491991,cg20432671,cg27582007,cg25726080,cg15464821
chr1	168104013	168106081	3	Yes	promoter	GPR161	No	6	cg01159288,cg02697423,cg05641439,cg15705071,cg04736140,cg00416176	15	cg18903407,cg14891816,cg01159288,cg27099896,cg02697423,cg11588213,cg05029764,cg05641439,cg13772727,cg15705071,cg04736140,cg00416176,cg04438377,cg04056560,cg15904955
chr1	170628610	170635483	2	Yes	promoter	PRRX1	Yes	21	cg00916255,cg24376434,cg16101739,cg04157201,cg26308330,cg10730174,cg03350186,cg10126409,cg22693806,cg10509323,cg09408098,cg07149609,cg04123776,cg23089825,cg15711902,cg03760589,cg22797031,cg22795586,cg06926146,cg11953609,cg12439157	22	cg20479035,cg24376434,cg16101739,cg04157201,cg26308330,cg03350186,cg21124196,cg14820859,cg14183781,cg03692038,cg22693806,cg10509323,cg09408098,cg07149609,cg04123776,cg15711902,cg03760589,cg22797031,cg22795586,cg06926146,cg11953609,cg12439157
chr1	171219895	171221413	3	No	promoter	RP1-45C12.1	No	4	cg13963738,cg00528040,cg24881664,cg11199869	7	cg08304168,cg22772170,cg22264766,cg15787491,cg13963738,cg00528040,cg11199869
chr1	171810594	171812411	3	Yes	promoter	DNM3	No	6	cg16515523,cg20800956,cg26839871,cg23391785,cg05377226,cg06211893	5	cg16515523,cg20800956,cg26839871,cg23391785,cg05377226
chr1	175160288	175163205	3	Yes	promoter	KIAA0040	Yes	19	cg07916615,cg00958927,cg17845761,cg14847009,cg00321850,cg08873628,cg11973900,cg13857382,cg00099768,cg18880390,cg17839543,cg26563583,cg22626041,cg11908570,cg01808492,cg01095590,cg06187103,cg06835628,cg03317045	20	cg04188348,cg00958927,cg17845761,cg14847009,cg00321850,cg22764845,cg08873628,cg05404729,cg11973900,cg00099768,cg18880390,cg17839543,cg26563583,cg22626041,cg11908570,cg01808492,cg01095590,cg06187103,cg06835628,cg03317045
chr1	175856291	175858289	3	No	intergenic	NA	No	4	cg05888252,cg19309488,cg15139452,cg22343877	4	cg05888252,cg19309488,cg06023946,cg15139452
chr1	176520748	176522933	3	No	promoter	PAPPA2	No	1	cg17885794	5	cg08927643,cg25546992,cg00038038,cg21165513,cg17885794
chr1	177132659	177134892	3	Yes	promoter	ASTN1	No	8	cg13115661,cg23492043,cg14659404,cg06650419,cg00319545,cg12907702,cg17105834,cg12268575	16	cg13115661,cg15004863,cg23492043,cg01493238,cg06165434,cg01743819,cg02211913,cg14895591,cg14659404,cg22891212,cg25631060,cg06650419,cg00319545,cg12907702,cg17105834,cg12268575
chr1	177139436	177141433	3	Yes	promoter	BRINP2	No	10	cg16123101,cg13589108,cg21523908,cg19993589,cg13685951,cg20846447,cg06758591,cg04209911,cg13843613,cg22371227	14	cg16123101,cg13589108,cg21523908,cg21079107,cg12982369,cg19993589,cg09954323,cg13685951,cg20846447,cg06758591,cg04209911,cg13843613,cg18689783,cg12333300
chr1	179262079	179264933	1	Yes	promoter	SOAT1	No	13	cg12118011,cg24378597,cg27230496,cg04297152,cg17465886,cg23227500,cg14024780,cg06709324,cg08630962,cg08482108,cg01774454,cg02081976,cg02275294	18	cg12118011,cg24378597,cg27230496,cg04297152,cg17465886,cg23227500,cg14024780,cg06709324,cg08630962,cg08482108,cg01774454,cg22718095,cg23442917,cg11256947,cg02081976,cg24657337,cg02275294,cg20837379
chr1	179544164	179546153	3	Yes	promoter	NPHS2,RNU5F-2P	No	15	cg10543035,cg24867790,cg23045073,cg01938018,cg19016332,cg13931925,cg11237426,cg10711209,cg20701486,cg06515144,cg10980436,cg08229358,cg08186924,cg24483554,cg26822551	12	cg10543035,cg24867790,cg23045073,cg01938018,cg13931925,cg11237426,cg10711209,cg06515144,cg08186924,cg10641328,cg24483554,cg26822551
chr1	179711337	179714504	2	Yes	promoter	FAM163A	No	19	cg21363811,cg24460126,cg14748380,cg16419354,cg06656994,cg20242752,cg03340466,cg20318608,cg19804605,cg13449778,cg00962913,cg00181968,cg09683824,cg27297088,cg00008036,cg13059719,cg12720643,cg05421688,cg02634341	19	cg11019045,cg21363811,cg24460126,cg14748380,cg16419354,cg06656994,cg20242752,cg03340466,cg20318608,cg13449778,cg00962913,cg00181968,cg09683824,cg10474240,cg27297088,cg00008036,cg12720643,cg05421688,cg02634341
chr1	179783280	179785466	3	No	gene body	FAM163A,RP11-12M5.3	No	3	cg05392737,cg25369168,cg11730719	3	cg05392737,cg25369168,cg11730719
chr1	180124184	180126055	3	Yes	promoter	QSOX1	No	2	cg08755040,cg14169790	2	cg08755040,cg14169790
chr1	180197586	180209413	2	Yes	promoter	LHX4	Yes	37	cg06826341,cg22436336,cg26225694,cg14989164,cg18063017,cg23598080,cg18863156,cg11189384,cg05719164,cg00177797,cg00882235,cg26410483,cg22683038,cg17827020,cg09671258,cg13877482,cg08647912,cg00838919,cg22352152,cg11958080,cg16999099,cg17359092,cg09235837,cg22384923,cg17428043,cg01566304,cg22126266,cg15202378,cg09081913,cg24864683,cg03469793,cg21172814,cg24198584,cg17836735,cg25680829,cg18866356,cg0…	41	cg06341867,cg06826341,cg22436336,cg06972794,cg14989164,cg18063017,cg23598080,cg18863156,cg11189384,cg05719164,cg00177797,cg22518802,cg00882235,cg26410483,cg22683038,cg17827020,cg09671258,cg13877482,cg08647912,cg00838919,cg15559926,cg22352152,cg06417237,cg11958080,cg16999099,cg17359092,cg05429955,cg09235837,cg22384923,cg12162682,cg17428043,cg01566304,cg22126266,cg09081913,cg04808988,cg24864683,cg0…
chr1	180880496	180883256	1	Yes	promoter	KIAA1614	No	10	cg06692785,cg19708901,cg02156380,cg12604950,cg07730364,cg23056823,cg00354179,cg04578935,cg23217419,cg01022200	10	cg06692785,cg02156380,cg12604950,cg26280553,cg07730364,cg23056823,cg00354179,cg04578935,cg23217419,cg01022200
chr1	181056766	181061667	3	Yes	promoter	IER5,RP11-309G3.3	Yes	16	cg03897866,cg26612165,cg11263705,cg16244220,cg11496811,cg12712846,cg10500218,cg16592623,cg03565782,cg05267654,cg07320311,cg24915511,cg07969646,cg13228642,cg22801949,cg02661372	17	cg03897866,cg26612165,cg16244220,cg11496811,cg12712846,cg10500218,cg16592623,cg01678753,cg03893077,cg05267654,cg09466310,cg07320311,cg24915511,cg23469673,cg13228642,cg22801949,cg02661372
chr1	181068296	181072034	3	No	intergenic	NA	Yes	2	cg06660570,cg09862509	3	cg06660570,cg09862509,cg03910518
chr1	181072937	181074420	1	Yes	intergenic	NA	Yes	2	cg08269389,cg04890480	2	cg08269389,cg04890480
chr1	181286115	181288679	2	Yes	intergenic	NA	No	9	cg19827716,cg15315157,cg11423323,cg12059112,cg16370586,cg22533517,cg02763800,cg11824956,cg18593081	9	cg19827716,cg15315157,cg11423323,cg12059112,cg16370586,cg22533517,cg02763800,cg11824956,cg18593081
chr1	181450790	181453544	2	Yes	promoter	CACNA1E	Yes	12	cg06987672,cg17987176,cg24106020,cg04902729,cg21378238,cg23241456,cg02431597,cg15742412,cg02974928,cg18533386,cg21963643,cg13948585	11	cg17987176,cg24106020,cg04902729,cg21790369,cg21378238,cg23241456,cg15742412,cg02974928,cg21963643,cg13948585,cg25658411
chr1	181454178	181455935	3	Yes	gene body	CACNA1E	Yes	5	cg24304249,cg01363596,cg25465938,cg25585172,cg00304388	4	cg24304249,cg25465938,cg25585172,cg00304388
chr1	182571651	182574286	1	Yes	promoter	RGS16	No	12	cg03517466,cg25591868,cg18611847,cg15088679,cg02688760,cg16178186,cg15717853,cg00966974,cg16891895,cg24848602,cg16824301,cg06875985	14	cg03517466,cg25591868,cg18611847,cg15088679,cg02688760,cg14554511,cg16423555,cg16178186,cg15717853,cg00966974,cg16891895,cg24848602,cg16824301,cg06875985
chr1	182582975	182586578	1	Yes	promoter	RP11-317P15.4	Yes	8	cg14651210,cg07822469,cg24085895,cg07144296,cg00153856,cg24052698,cg23474794,cg23045255	9	cg14651210,cg07822469,cg24085895,cg07144296,cg00153856,cg24052698,cg00824584,cg23474794,cg23045255
chr1	182757771	182759765	3	Yes	promoter	NPL	No	8	cg15293611,cg13559225,cg12045137,cg07202210,cg14844172,cg06676233,cg03994069,cg27583088	12	cg15293611,cg13559225,cg14844172,cg06676233,cg11872386,cg01190965,cg03994069,cg16623552,cg27583088,cg23850243,cg02940952,cg23991812
chr1	183385156	183388343	3	Yes	promoter	NMNAT2	Yes	13	cg03770703,cg10202457,cg00707317,cg00767642,cg26916166,cg15378492,cg22513924,cg16183361,cg11241436,cg08244866,cg15987885,cg23716800,cg00344178	12	cg20400698,cg03770703,cg10202457,cg06748143,cg00707317,cg26916166,cg15378492,cg22513924,cg16183361,cg04972968,cg08244866,cg15987885
chr1	183605097	183606450	3	Yes	promoter	ARPC5,RGL1	No	6	cg11519238,cg03125090,cg10120056,cg08233467,cg19767650,cg12725906	13	cg21208806,cg03125090,cg10120056,cg20880034,cg08233467,cg19108372,cg24679106,cg23679894,cg15779916,cg19767650,cg12725906,cg06024806,cg22139852
chr1	183773220	183776497	3	Yes	promoter	RGL1	No	5	cg25021590,cg18126943,cg01850505,cg26057754,cg04621654	10	cg08783210,cg15850502,cg25021590,cg18126943,cg01850505,cg26057754,cg24869762,cg04621654,cg26889362,cg10623785
chr1	184004795	184007484	1	Yes	promoter	COLGALT2	Yes	14	cg01068808,cg02314308,cg00044463,cg14313310,cg18073970,cg15359501,cg05777716,cg24721630,cg26429856,cg16655084,cg17357479,cg01436608,cg12222949,cg09013655	13	cg04200073,cg01068808,cg00044463,cg14313310,cg18073970,cg15359501,cg24721630,cg26429856,cg16655084,cg26495624,cg01436608,cg12222949,cg09013655
chr1	184356702	184359025	3	Yes	promoter	C1orf21,RP11-382D12.2	Yes	3	cg10061342,cg14509921,cg27167439	4	cg22487794,cg10061342,cg14509921,cg27167439
chr1	184941304	184944461	1	Yes	promoter	FAM129A	No	12	cg25182523,cg18166655,cg19255053,cg24325991,cg05655671,cg18845832,cg16250330,cg25149396,cg14028892,cg16170319,cg02360616,cg18801893	14	cg25182523,cg18166655,cg19255053,cg02192414,cg24325991,cg21633567,cg05655671,cg18845832,cg16250330,cg25149396,cg14028892,cg16170319,cg02360616,cg18801893
chr1	185702422	185705546	1	Yes	promoter	HMCN1	Yes	14	cg10091866,cg06194982,cg15842216,cg06361272,cg14172633,cg13496323,cg18390472,cg16721191,cg17286253,cg13788537,cg24514412,cg26145926,cg08276497,cg00098693	14	cg10091866,cg06194982,cg15842216,cg06361272,cg14172633,cg13496323,cg18390472,cg16721191,cg17286253,cg13788537,cg24514412,cg26145926,cg08276497,cg00098693
chr1	186648607	186651074	3	Yes	promoter	PTGS2,RP5-973M2.2	No	15	cg16101346,cg25147026,cg23070111,cg25837803,cg10180406,cg26564040,cg24887140,cg09461185,cg17419623,cg08482694,cg18335243,cg00690431,cg13986130,cg04881125,cg19155599	17	cg16101346,cg25147026,cg23070111,cg25837803,cg10180406,cg26564040,cg14147740,cg24887140,cg09461185,cg05412478,cg17419623,cg08482694,cg18335243,cg00690431,cg13986130,cg04881125,cg19155599
chr1	190443292	190445895	3	No	promoter	BRINP3	No	6	cg10316490,cg23599771,cg12124386,cg02893231,cg21581821,cg05638359	13	cg12037100,cg20710502,cg10316490,cg23563684,cg10006933,cg27635797,cg23599771,cg12124386,cg02893231,cg21581821,cg05638359,cg05777089,cg15659284
chr1	190446345	190449131	3	No	promoter	BRINP3,RP11-161I10.1,RP11-547I7.2	No	8	cg24365464,cg06805320,cg13464924,cg08876441,cg23010538,cg10951619,cg06367647,cg19632206	11	cg13342668,cg24365464,cg15050627,cg19885684,cg13464924,cg08876441,cg23010538,cg10951619,cg06060327,cg06367647,cg19632206
chr1	197742727	197745589	3	Yes	promoter	DENND1B	No	13	cg17611742,cg21534578,cg24461171,cg17723299,cg03763769,cg06671340,cg24393699,cg05780177,cg13107428,cg12140668,cg02736602,cg10975057,cg15713362	22	cg19661902,cg17611742,cg21534578,cg24461171,cg17723299,cg03763769,cg06671340,cg24393699,cg05780177,cg16963632,cg13107428,cg27636165,cg25634004,cg21095229,cg13535604,cg16507861,cg12140668,cg02736602,cg10975057,cg15713362,cg11303701,cg21273155
chr1	197870636	197872958	1	Yes	promoter	C1orf53	No	11	cg08917060,cg05907029,cg18233942,cg08695707,cg17939001,cg19092620,cg23593528,cg21140261,cg03200818,cg03517147,cg21817668	13	cg05907029,cg18233942,cg08695707,cg17939001,cg19092620,cg23593528,cg21140261,cg27645785,cg03200818,cg10267837,cg27211582,cg03517147,cg21817668
chr1	197879210	197883381	2	Yes	promoter	LHX9	No	21	cg17753347,cg05128414,cg16353006,cg15544654,cg25212090,cg05527530,cg27225220,cg08008403,cg13501359,cg17521338,cg24085809,cg07214572,cg21606780,cg10897376,cg17777738,cg19704348,cg16353957,cg13364881,cg22671471,cg06371502,cg26048448	23	cg17753347,cg05128414,cg16353006,cg15544654,cg25212090,cg05527530,cg27225220,cg08008403,cg24968632,cg13501359,cg17521338,cg19976315,cg24085809,cg13741580,cg07214572,cg21606780,cg10897376,cg17777738,cg19704348,cg16353957,cg22671471,cg06371502,cg26048448
chr1	197883726	197888467	2	Yes	promoter	LHX9	No	16	cg00795248,cg20329405,cg08463788,cg12444328,cg20743365,cg03660500,cg02393845,cg23620228,cg23826573,cg01445052,cg07007717,cg19363604,cg00358880,cg09266206,cg24340786,cg00783748	23	cg00795248,cg20329405,cg08463788,cg12444328,cg20743365,cg03660500,cg02393845,cg23620228,cg23826573,cg01445052,cg17779824,cg15754535,cg07007717,cg19363604,cg11737412,cg23428100,cg00358880,cg19450406,cg09266206,cg22830578,cg24340786,cg02949670,cg00783748
chr1	197888547	197891436	2	Yes	gene body	LHX9	No	8	cg26816907,cg22443762,cg12434982,cg05920909,cg04365202,cg09076431,cg13420848,cg08883223	7	cg26816907,cg22443762,cg12434982,cg05920909,cg04365202,cg09076431,cg08883223
chr1	199997368	199999854	3	No	promoter	NR5A2	No	3	cg23806259,cg18394216,cg23996829	2	cg18394216,cg23996829
chr1	200002099	200013341	3	Yes	promoter	NR5A2	No	44	cg08158862,cg22515278,cg05470502,cg02773945,cg00001583,cg17486263,cg05391318,cg14025556,cg06244002,cg02457750,cg04025964,cg17520027,cg18203366,cg03257172,cg17759535,cg17804356,cg04097639,cg24157531,cg13476077,cg21540765,cg24352938,cg16993043,cg21851672,cg04308769,cg10972873,cg04605987,cg10506445,cg13229857,cg07926895,cg19713947,cg24553673,cg07208853,cg12730323,cg15130541,cg02779944,cg01941755,cg1…	47	cg08158862,cg11168908,cg22515278,cg05470502,cg22560205,cg14340422,cg02773945,cg00001583,cg27556051,cg17486263,cg05391318,cg03211935,cg05519235,cg06244002,cg02457750,cg04025964,cg17520027,cg18203366,cg03257172,cg17759535,cg17804356,cg24157531,cg13476077,cg21540765,cg24352938,cg21851672,cg04308769,cg10972873,cg04605987,cg10506445,cg13229857,cg07926895,cg19713947,cg24553673,cg07208853,cg12730323,cg1…
chr1	200270625	200272660	3	Yes	intergenic	NA	No	9	cg07138399,cg22810423,cg06811094,cg20817465,cg06792347,cg22506841,cg16144193,cg21945639,cg07046575	10	cg07138399,cg22810423,cg06811094,cg20817465,cg06792347,cg22506841,cg24293285,cg16144193,cg21945639,cg07046575
chr1	200990532	200992786	3	Yes	promoter	KIF21B,RP11-168O16.1	Yes	6	cg07010314,cg26228351,cg18807223,cg06812278,cg24444188,cg21888214	6	cg07010314,cg26228351,cg18807223,cg25433136,cg06812278,cg24444188
chr1	201082843	201084683	1	Yes	promoter	ASCL5	Yes	8	cg01987224,cg24849736,cg08885800,cg24554319,cg06353614,cg18471160,cg22815214,cg17810781	12	cg06154338,cg09655942,cg04107533,cg01987224,cg24849736,cg17766148,cg08885800,cg24554319,cg06353614,cg18471160,cg22815214,cg17810781
chr1	201367210	201369836	1	Yes	promoter	LAD1	No	11	cg11418783,cg26539023,cg23715582,cg25947945,cg23291161,cg27425612,cg21964551,cg07561547,cg10095226,cg02838178,cg19713196	12	cg11418783,cg26539023,cg23715582,cg25947945,cg23291161,cg27425612,cg21964551,cg07561547,cg14952599,cg10095226,cg02838178,cg19713196
chr1	201436515	201439676	1	Yes	promoter	PHLDA3	No	12	cg00124009,cg00962755,cg00785170,cg13645078,cg21306294,cg18569595,cg10971895,cg01807886,cg10773982,cg20771670,cg08639762,cg04055835	16	cg00124009,cg00962755,cg00785170,cg13645078,cg21306294,cg18569595,cg10971895,cg13413412,cg09960211,cg01807886,cg10773982,cg20771670,cg24453192,cg04214350,cg08639762,cg04055835
chr1	201449747	201451651	3	Yes	intergenic	NA	Yes	6	cg00252442,cg27559399,cg10257545,cg24859316,cg02698600,cg16100655	6	cg00252442,cg27559399,cg10257545,cg24859316,cg02698600,cg16100655
chr1	201474588	201477015	1	Yes	promoter	CSRP1,RP11-134G8.7	No	14	cg13561226,cg22942576,cg24155190,cg10482632,cg16357582,cg13207467,cg18342253,cg05812950,cg17780098,cg00540544,cg19099833,cg13554744,cg04772818,cg11145461	20	cg22942576,cg26371847,cg24155190,cg10482632,cg16357582,cg13207467,cg15793624,cg01985527,cg01361954,cg18342253,cg17780098,cg00540544,cg19099833,cg17646100,cg17771587,cg21298511,cg18213470,cg13554744,cg04772818,cg11145461
chr1	201506907	201510480	3	Yes	intergenic	NA	Yes	9	cg04121938,cg04223671,cg14248553,cg11712835,cg12908763,cg23012527,cg08888625,cg21577233,cg11963006	10	cg04121938,cg04223671,cg14248553,cg11712835,cg12908763,cg14398960,cg23012527,cg08888625,cg21577233,cg11963006
chr1	201616221	201621031	1	Yes	promoter	NAV1	Yes	16	cg03400139,cg08883485,cg04287574,cg04179952,cg00313914,cg07599786,cg19827875,cg14920846,cg09358973,cg05695937,cg16517702,cg14834267,cg13071729,cg12417362,cg12468255,cg25167447	15	cg03400139,cg08883485,cg04287574,cg04179952,cg07599786,cg19827875,cg14920846,cg09358973,cg16517702,cg14834267,cg13071729,cg12417362,cg15795962,cg12468255,cg25167447
chr1	201857016	201859234	3	No	promoter	SHISA4	No	12	cg26203861,cg03046819,cg19624873,cg08739233,cg01765403,cg00617305,cg12409211,cg26349606,cg14263176,cg06775570,cg11586189,cg06750292	14	cg26203861,cg19624873,cg08739233,cg01765403,cg00617305,cg12409211,cg26349606,cg14263176,cg00410788,cg22572173,cg05582926,cg06775570,cg11586189,cg06750292
chr1	202162099	202163874	3	Yes	promoter	LGR6	No	6	cg09030189,cg27555099,cg04343883,cg04351903,cg07097863,cg15096432	9	cg09030189,cg27555099,cg27091807,cg20861053,cg02549964,cg04343883,cg04351903,cg07097863,cg15096432
chr1	202182551	202184253	3	Yes	promoter	LGR6	No	7	cg11243683,cg21142038,cg04131431,cg09854088,cg09363587,cg17830682,cg03985801	7	cg21142038,cg04131431,cg09854088,cg09363587,cg26475818,cg17830682,cg03985801
chr1	202611223	202614737	3	Yes	promoter	SYT2	No	10	cg00982214,cg13382288,cg12070351,cg22015128,cg05630812,cg02053850,cg15586779,cg10327424,cg16724416,cg26535723	15	cg00982214,cg13382288,cg12070351,cg06883923,cg22015128,cg05630812,cg23777848,cg16064679,cg02053850,cg15586779,cg10327424,cg16724416,cg03923117,cg00773514,cg26535723
chr1	202677944	202680643	3	Yes	promoter	SYT2	No	11	cg05715649,cg11785154,cg23959605,cg16315376,cg05752786,cg22594309,cg05127456,cg02151754,cg23278267,cg12773604,cg16899351	15	cg05715649,cg11785154,cg23959605,cg16315376,cg20844317,cg01548178,cg03860813,cg27379088,cg06921081,cg22594309,cg05127456,cg02151754,cg23278267,cg12773604,cg16899351
chr1	202780166	202782142	1	Yes	promoter	PCAT6,RP11-480I12.10	Yes	5	cg20677516,cg01992990,cg10101463,cg20415365,cg06092654	4	cg20677516,cg10101463,cg20415365,cg06092654
chr1	202995004	202997362	1	Yes	promoter	PPFIA4	No	7	cg12096325,cg06622528,cg16819803,cg06962801,cg11713664,cg01352586,cg00501542	9	cg12096325,cg06622528,cg16819803,cg06962801,cg11713664,cg27104969,cg01352586,cg13884889,cg00501542
chr1	203044153	203045810	3	Yes	promoter	PPFIA4	No	5	cg09396704,cg00805880,cg17862152,cg14640592,cg15618108	5	cg09396704,cg00805880,cg17862152,cg14640592,cg15618108
chr1	203095130	203098204	3	Yes	promoter	ADORA1,RP11-335O13.7	No	15	cg05803596,cg24408776,cg20142535,cg22730967,cg16293981,cg04563290,cg12794758,cg00256767,cg03547181,cg07232945,cg01133446,cg19315653,cg11341981,cg24141663,cg10111764	20	cg05803596,cg24408776,cg20142535,cg22730967,cg16293981,cg04563290,cg07849735,cg27480064,cg12794758,cg00256767,cg03547181,cg18960668,cg07232945,cg01133446,cg19315653,cg05544467,cg11341981,cg04822851,cg24141663,cg10111764
chr1	203241844	203243575	3	Yes	promoter	CHIT1	No	7	cg03890167,cg17220161,cg22854078,cg07219103,cg21933812,cg04420275,cg07098528	9	cg17210263,cg05086084,cg03890167,cg17220161,cg22854078,cg07219103,cg21933812,cg04420275,cg07098528
chr1	203259056	203260610	1	No	intergenic	NA	Yes	1	cg19769827	1	cg19769827
chr1	203273596	203278273	3	Yes	promoter	BTG2,RP11-134P9.1	No	12	cg06373167,cg01798157,cg23371584,cg02299360,cg24337809,cg13556604,cg10935550,cg17083411,cg11386686,cg12586428,cg00860712,cg00567854	13	cg06373167,cg01798157,cg23371584,cg24337809,cg13556604,cg10935550,cg09944242,cg17083411,cg11386686,cg12586428,cg04172254,cg00860712,cg00567854
chr1	203596631	203600004	1	Yes	promoter	ATP2B4	Yes	9	cg02457623,cg21397588,cg15732851,cg26253438,cg17721249,cg04148762,cg27173151,cg13558971,cg03161476	10	cg08742879,cg02457623,cg21397588,cg15732851,cg26253438,cg17721249,cg04148762,cg27173151,cg13558971,cg03161476
chr1	204043030	204045799	3	Yes	promoter	SOX13	Yes	4	cg11216917,cg06882199,cg01121610,cg09359106	5	cg03858590,cg11216917,cg06882199,cg01121610,cg09359106
chr1	204119247	204122140	3	Yes	promoter	ETNK2	No	12	cg01566404,cg00103329,cg21535580,cg20136584,cg08114257,cg25512657,cg06545166,cg25623721,cg04913057,cg02990368,cg12638737,cg01205165	14	cg01566404,cg00103329,cg21535580,cg20136584,cg08114257,cg20936980,cg01486694,cg25512657,cg06545166,cg25623721,cg04913057,cg02990368,cg12638737,cg01205165
chr1	204346164	204348174	1	Yes	promoter	RP11-739N20.2	No	7	cg19403103,cg09150239,cg10519709,cg07959491,cg08784911,cg24734365,cg02736228	8	cg19403103,cg09150239,cg10519709,cg07959491,cg20034980,cg08784911,cg24734365,cg02736228
chr1	204652338	204655667	3	Yes	promoter	LRRN2	Yes	10	cg16456919,cg17112828,cg05785988,cg03027354,cg05785298,cg23959366,cg24602552,cg04698187,cg17838427,cg22817352	11	cg16456919,cg17112828,cg05785988,cg02438943,cg16339644,cg03027354,cg05785298,cg24602552,cg04698187,cg17838427,cg22817352
chr1	204797139	204799363	3	Yes	promoter	NFASC	No	5	cg22571530,cg24085946,cg17042926,cg03043228,cg05369166	4	cg22571530,cg17042926,cg03043228,cg05369166
chr1	205197024	205198990	3	Yes	promoter	TMCC2	No	4	cg24581572,cg00977805,cg14514226,cg06912830	13	cg06327472,cg01934587,cg00511232,cg02673880,cg23521101,cg14145044,cg24581572,cg14498996,cg00977805,cg14514226,cg06912830,cg02666387,cg24156356
chr1	205311947	205314287	3	Yes	promoter	KLHDC8A	No	7	cg23638226,cg21538450,cg12132731,cg13615187,cg10567964,cg19593949,cg00407231	9	cg23638226,cg21538450,cg12132731,cg13615187,cg24343980,cg10567964,cg19593949,cg00407231,cg12284872
chr1	205415702	205419300	1	No	promoter	LEMD1,MIR135B	Yes	5	cg02952078,cg13061767,cg02520707,cg25202407,cg02999711	9	cg02952078,cg17560662,cg24382100,cg13061767,cg19841284,cg02520707,cg25202407,cg20254084,cg02999711
chr1	205742909	205745242	3	Yes	promoter	RAB7L1	No	10	cg25409748,cg06349179,cg11480873,cg12580275,cg14982357,cg24054215,cg09635067,cg26418147,cg16031515,cg03595243	14	cg25409748,cg20923942,cg25545142,cg21230651,cg20857291,cg06349179,cg11480873,cg12580275,cg17837735,cg24054215,cg09635067,cg26418147,cg16031515,cg03595243
chr1	206222750	206224807	3	Yes	promoter	AVPR1B,RP11-38J22.3	No	10	cg11215296,cg08709672,cg04633513,cg17940251,cg26795730,cg00761787,cg17587023,cg10818339,cg27169129,cg18992688	11	cg11215296,cg08709672,cg04633513,cg17940251,cg16368479,cg26795730,cg00761787,cg17587023,cg10818339,cg27169129,cg18992688
chr1	206679441	206682167	1	Yes	promoter	RASSF5	No	12	cg04144533,cg18328206,cg24450312,cg19452316,cg09133006,cg16554516,cg22237459,cg10167296,cg15057150,cg16032102,cg17558126,cg16122716	17	cg04144533,cg18328206,cg24450312,cg19452316,cg09133006,cg16554516,cg16192320,cg22237459,cg06461035,cg10305922,cg10167296,cg15057150,cg16032102,cg04330777,cg17558126,cg16122716,cg05616413
chr1	206729760	206731569	3	Yes	promoter	RASSF5	No	11	cg22401939,cg02589695,cg23520347,cg22857604,cg26271110,cg01860753,cg01917016,cg08617916,cg21204904,cg22871559,cg21218864	13	cg22401939,cg02589695,cg23520347,cg22857604,cg26271110,cg01860753,cg01917016,cg23579770,cg08617916,cg21204904,cg24121864,cg22871559,cg21218864
chr1	206830988	206832975	3	No	gene body	DYRK3	Yes	1	cg08128274	1	cg08128274
chr1	206858958	206861312	3	Yes	promoter	MAPKAPK2	Yes	4	cg24657977,cg23145622,cg23610420,cg25155009	5	cg19033712,cg24657977,cg23145622,cg23610420,cg25155009
chr1	207081947	207084022	3	Yes	gene body	FAIM3	No	6	cg05721773,cg26014884,cg13290370,cg00008647,cg06528575,cg21607172	3	cg00008647,cg06528575,cg21607172
chr1	207627042	207628934	3	Yes	promoter	CR2	No	10	cg23810846,cg00247489,cg06531007,cg05831823,cg10993336,cg04439623,cg09936645,cg18561881,cg25209633,cg05508558	13	cg13010214,cg23810846,cg00247489,cg06531007,cg10993336,cg11444033,cg18294909,cg04439623,cg09936645,cg18561881,cg09281684,cg25209633,cg05508558
chr1	207668624	207670709	1	Yes	promoter	CR1	No	12	cg19411989,cg11195082,cg00175709,cg10021878,cg02588107,cg05825950,cg18147366,cg05922028,cg17147317,cg14726637,cg22049321,cg25029035	13	cg19411989,cg11195082,cg00175709,cg02588107,cg05825950,cg18147366,cg05727934,cg05922028,cg17147317,cg07679226,cg14726637,cg22049321,cg25029035
chr1	208041151	208043459	3	Yes	intergenic	NA	No	8	cg16290275,cg10485447,cg11844110,cg17413328,cg23163837,cg21961336,cg16549711,cg11037818	10	cg05338949,cg25521882,cg16290275,cg10485447,cg21672435,cg11844110,cg23163837,cg21961336,cg16549711,cg11037818
chr1	208083696	208085310	3	Yes	promoter	CD34	No	12	cg26266618,cg03583857,cg20293352,cg19591881,cg04292718,cg21455438,cg16115720,cg01566217,cg27566858,cg16291276,cg03990033,cg04197452	17	cg26266618,cg03583857,cg20293352,cg02733698,cg17080825,cg22843663,cg05618916,cg24888243,cg00472099,cg04292718,cg21455438,cg16115720,cg01566217,cg27566858,cg16291276,cg03990033,cg04197452
chr1	208131846	208133680	2	Yes	intergenic	NA	No	6	cg15770106,cg10210594,cg10236452,cg00901051,cg13298199,cg27526649	6	cg15770106,cg10210594,cg10236452,cg00901051,cg13298199,cg27526649
chr1	208135987	208137839	1	Yes	intergenic	NA	Yes	5	cg12277870,cg05982973,cg15031826,cg14027857,cg07283659	5	cg12277870,cg15031826,cg14027857,cg07283659,cg00688321
chr1	208414312	208419264	3	Yes	promoter	PLXNA2	Yes	13	cg02808797,cg10435664,cg01720941,cg12446246,cg17956387,cg16900349,cg11159591,cg23096282,cg01905828,cg13228105,cg06942064,cg12017102,cg00823095	15	cg02808797,cg10435664,cg12446246,cg17956387,cg16900349,cg11159591,cg23096282,cg01905828,cg21253567,cg15943986,cg23403950,cg13228105,cg06942064,cg12017102,cg00823095
chr1	209756732	209758243	3	No	promoter	CAMK1G	No	2	cg27337148,cg01530981	4	cg15892180,cg27131867,cg27337148,cg01530981
chr1	209758496	209759850	3	No	gene body	CAMK1G	No	3	cg11804335,cg24310038,cg14034757	3	cg11144351,cg11804335,cg14034757
chr1	209847382	209849958	3	Yes	promoter	G0S2,RP1-28O10.1	No	13	cg26050864,cg02638691,cg19534438,cg08158408,cg08185241,cg13460643,cg17710021,cg27176828,cg14824901,cg09666230,cg06616057,cg07434244,cg23646375	13	cg26050864,cg19534438,cg08185241,cg13460643,cg10671306,cg17710021,cg27176828,cg14824901,cg24933191,cg09666230,cg06616057,cg09886578,cg23646375
chr1	210404932	210408659	3	Yes	promoter	SERTAD4,SERTAD4-AS1	No	16	cg15926004,cg18234296,cg16118387,cg05723989,cg18265162,cg08900371,cg20270863,cg25876656,cg04282788,cg24060037,cg22209624,cg08707786,cg22864433,cg06098761,cg02304930,cg02743029	21	cg15926004,cg18234296,cg16118387,cg05723989,cg18265162,cg08900371,cg20270863,cg25876656,cg04282788,cg24060037,cg08707786,cg12556601,cg04325422,cg19782883,cg26696517,cg11342300,cg04056665,cg06098761,cg02304930,cg02743029,cg13884907
chr1	210464980	210466861	3	Yes	intergenic	NA	No	4	cg09074223,cg27185504,cg00173141,cg12030860	5	cg09074223,cg27185504,cg00173141,cg12030860,cg15789044
chr1	210501286	210503764	3	Yes	promoter	HHAT	No	11	cg15945769,cg03145134,cg15344228,cg01056350,cg18160291,cg16119246,cg09276883,cg14159522,cg03893872,cg22332066,cg25734421	17	cg09481871,cg15945769,cg03145134,cg25261995,cg01056350,cg18160291,cg04805418,cg16119246,cg27218701,cg09276883,cg14159522,cg03893872,cg22332066,cg06609493,cg13333117,cg07481038,cg25734421
chr1	211305828	211308310	3	Yes	promoter	KCNH1,KCNH1-IT1	No	10	cg09518270,cg00787537,cg21092462,cg06582752,cg09084829,cg02752882,cg23086161,cg10203375,cg22197787,cg00097452	15	cg09518270,cg00787537,cg21092462,cg06582752,cg02530232,cg09084829,cg14908999,cg02752882,cg23086161,cg10203375,cg22197787,cg21308754,cg10522726,cg21623161,cg00097452
chr1	211499522	211502120	1	Yes	promoter	TRAF5	Yes	11	cg21158528,cg10380585,cg11131549,cg20912172,cg11225849,cg17222992,cg25812776,cg09139451,cg01780943,cg10177528,cg09061993	17	cg21158528,cg10380585,cg09280610,cg11131549,cg20912172,cg11225849,cg17222992,cg05602157,cg25812776,cg02941293,cg01493621,cg21096990,cg09139451,cg11879620,cg01780943,cg10177528,cg09061993
chr1	211688168	211689634	3	Yes	intergenic	NA	Yes	6	cg18133961,cg15322207,cg24524366,cg15525053,cg04362907,cg17043722	6	cg18133961,cg15322207,cg24524366,cg15525053,cg03505536,cg17043722
chr1	212002184	212004716	1	Yes	promoter	LPGAT1,RP11-552D8.1	No	13	cg26659410,cg04489786,cg17890782,cg16028793,cg08183490,cg14039463,cg13064658,cg01470925,cg22109331,cg14513226,cg07569918,cg07097417,cg01168776	21	cg22906032,cg21518767,cg18333817,cg26659410,cg04489786,cg17890782,cg16028793,cg08183490,cg25985646,cg14039463,cg11290603,cg13064658,cg01470925,cg22109331,cg14513226,cg05146057,cg16419533,cg23588204,cg07569918,cg07097417,cg01168776
chr1	212778433	212782003	3	Yes	promoter	ATF3	Yes	14	cg07199812,cg24141233,cg17156531,cg13230348,cg21281234,cg03717803,cg02636234,cg17080534,cg01668452,cg15831613,cg24365042,cg21395152,cg04203508,cg25386151	14	cg07199812,cg24141233,cg13408549,cg13230348,cg21281234,cg03717803,cg02636234,cg17080534,cg01668452,cg15831613,cg24365042,cg21395152,cg04203508,cg25386151
chr1	212782688	212785040	1	Yes	promoter	ATF3	No	3	cg20169506,cg05880577,cg10103631	2	cg20169506,cg10103631
chr1	212871853	212875161	2	Yes	promoter	BATF3	No	13	cg15718594,cg08138435,cg26072906,cg00168835,cg06150468,cg09952946,cg16410706,cg00505979,cg21774754,cg14588027,cg07589846,cg21421701,cg22162870	14	cg15718594,cg08138435,cg26072906,cg00168835,cg06150468,cg16424105,cg16410706,cg00505979,cg26381322,cg07589846,cg21421701,cg22162870,cg20637770,cg17178730
chr1	214152164	214154794	3	Yes	promoter	PROX1-AS1	No	12	cg06177568,cg06087349,cg15198235,cg24244374,cg25742246,cg02892286,cg26926612,cg26933866,cg25196158,cg26054764,cg02919116,cg00668303	9	cg06087349,cg15198235,cg24244374,cg25742246,cg26926612,cg25196158,cg26054764,cg02919116,cg00668303
chr1	214155231	214161061	2	Yes	promoter	PROX1,PROX1-AS1	Yes	19	cg17954152,cg23992410,cg01019971,cg20692998,cg06623935,cg18318878,cg10288510,cg23971069,cg06268921,cg07204874,cg01631319,cg23633547,cg07896717,cg00949753,cg00795024,cg05052969,cg10769146,cg17087479,cg10722226	25	cg17954152,cg23992410,cg27222317,cg02154110,cg02187468,cg01019971,cg22210652,cg06623935,cg11225179,cg18318878,cg10288510,cg23971069,cg06268921,cg07204874,cg01631319,cg05999983,cg23633547,cg07896717,cg00949753,cg00795024,cg05052969,cg14810798,cg10769146,cg22269543,cg17087479
chr1	214161201	214163993	3	Yes	promoter	PROX1,PROX1-AS1	Yes	12	cg23084895,cg22489498,cg26293546,cg24083324,cg04976324,cg12298905,cg22176895,cg06694137,cg23260547,cg10827893,cg14019317,cg25347098	12	cg23084895,cg22489498,cg26293546,cg24083324,cg12298905,cg22176895,cg15660832,cg06694137,cg07781959,cg10827893,cg14019317,cg25347098
chr1	214397513	214399172	3	No	intergenic	NA	No	1	cg08855938	2	cg08855938,cg25124095
chr1	214454704	214456897	3	Yes	promoter	SMYD2	No	3	cg00825252,cg04406444,cg14013804	3	cg10458600,cg04406444,cg14013804
chr1	215254684	215257520	3	Yes	promoter	KCNK2	No	14	cg04238348,cg05961348,cg01418885,cg26547924,cg04976337,cg11398511,cg10592245,cg17130063,cg18794839,cg09441363,cg17934948,cg08453036,cg05129325,cg11200222	14	cg04238348,cg05961348,cg01418885,cg26547924,cg11398511,cg10592245,cg17130063,cg13197479,cg18794839,cg09441363,cg17934948,cg08453036,cg05129325,cg11200222
chr1	216773725	216775377	1	Yes	gene body	ESRRG	Yes	7	cg15998609,cg20869501,cg01371155,cg06960784,cg20464246,cg23637314,cg00909926	7	cg15998609,cg20869501,cg01371155,cg20464246,cg23637314,cg00909926,cg14300578
chr1	217261360	217264341	3	Yes	promoter	ESRRG	No	9	cg25614875,cg07312357,cg11692820,cg24933127,cg22419039,cg03750606,cg16277607,cg23273333,cg00575003	13	cg25614875,cg07312357,cg11692820,cg24933127,cg12240886,cg03821675,cg22419039,cg27581159,cg11013583,cg03750606,cg16277607,cg23273333,cg00575003
chr1	217306917	217314783	2	Yes	promoter	ESRRG	Yes	32	cg00983697,cg13321105,cg23663428,cg00116092,cg13461390,cg13967702,cg11800620,cg27520776,cg24630419,cg22118524,cg25755575,cg00913949,cg25975621,cg21784383,cg06634716,cg07029873,cg26004203,cg00255368,cg04236178,cg03219968,cg09826050,cg12636169,cg10977770,cg25851789,cg09106903,cg01926051,cg05388492,cg26183250,cg03224209,cg18181196,cg01958550,cg07155223	32	cg00983697,cg13321105,cg23663428,cg00116092,cg13967702,cg11800620,cg27520776,cg24630419,cg22118524,cg25755575,cg00913949,cg25452854,cg14878917,cg25975621,cg21784383,cg07029873,cg26004203,cg00255368,cg04236178,cg03219968,cg09826050,cg12636169,cg10977770,cg25851789,cg09106903,cg01926051,cg05388492,cg26183250,cg03224209,cg18181196,cg01958550,cg07155223
chr1	218336457	218340450	1	Yes	intergenic	NA	Yes	8	cg11743528,cg14468913,cg24081688,cg11537367,cg03743008,cg01569204,cg01070794,cg26930448	9	cg11743528,cg14468913,cg24081688,cg11537367,cg03743008,cg01569204,cg01070794,cg26930448,cg14987903
chr1	218517688	218522434	3	Yes	promoter	RP11-224O19.2,TGFB2	No	16	cg01558923,cg17934824,cg27508144,cg22021178,cg13285637,cg06899755,cg11976166,cg09167119,cg12461345,cg08746138,cg16361301,cg25851842,cg16658719,cg26343258,cg16899280,cg21387604	23	cg01558923,cg17934824,cg27508144,cg22021178,cg13285637,cg06899755,cg11976166,cg09167119,cg08746138,cg16361301,cg25851842,cg12334705,cg06369583,cg16658719,cg23889054,cg05193512,cg02361229,cg16899280,cg24763568,cg21387604,cg06674304,cg14598116,cg22349718
chr1	220100636	220102753	3	Yes	promoter	SLC30A10	No	15	cg02557906,cg05155775,cg21648401,cg19313402,cg27295373,cg25841634,cg12355180,cg25317664,cg23815582,cg10325600,cg24933645,cg24396691,cg17721710,cg14848594,cg26685195	18	cg07905105,cg02557906,cg21648401,cg19313402,cg04647768,cg27295373,cg25841634,cg25638859,cg12355180,cg14235398,cg25317664,cg23815582,cg10325600,cg24933645,cg24396691,cg17721710,cg14848594,cg26685195
chr1	220862718	220865373	1	Yes	promoter	C1orf115	Yes	13	cg21938406,cg01471713,cg18959309,cg09786013,cg07699311,cg13560871,cg24310461,cg01491219,cg27660104,cg21852292,cg03853809,cg24003560,cg24596998	16	cg21938406,cg01471713,cg09786013,cg07699311,cg13560871,cg24310461,cg04624946,cg05287415,cg01491219,cg27660104,cg21852292,cg03853809,cg24003560,cg24596998,cg18651224,cg25088807
chr1	220920393	220922993	1	Yes	promoter	MARC2	No	14	cg19030620,cg19361865,cg00513220,cg23214787,cg04226749,cg23593167,cg02367736,cg26000554,cg26218412,cg00162751,cg04392469,cg03440757,cg23054437,cg08119231	14	cg19030620,cg00513220,cg23214787,cg04226749,cg23593167,cg02514528,cg26000554,cg26218412,cg00162751,cg04392469,cg03440757,cg23054437,cg08119231,cg13263137
chr1	221049377	221056435	2	Yes	promoter	HLA-AS1,HLX	Yes	38	cg17852326,cg09255910,cg14166284,cg04436994,cg07584855,cg02455346,cg19306970,cg12479878,cg07179669,cg22698272,cg20454002,cg22041228,cg02928365,cg21282663,cg24604749,cg15356516,cg12405785,cg22852355,cg04683240,cg22888665,cg19099796,cg09580567,cg18800479,cg23027583,cg18704691,cg02625929,cg13170032,cg21878149,cg23616139,cg18645081,cg06647600,cg03329019,cg23647410,cg25140419,cg10386298,cg03901660,cg2…	41	cg17852326,cg09255910,cg14166284,cg04436994,cg07584855,cg02455346,cg19306970,cg12479878,cg07179669,cg22698272,cg22773697,cg21919047,cg20454002,cg22041228,cg02928365,cg21282663,cg24604749,cg23769968,cg18441719,cg15356516,cg12405785,cg04683240,cg22888665,cg19099796,cg09580567,cg18800479,cg18704691,cg13170032,cg21878149,cg23616139,cg18645081,cg02390933,cg13547928,cg06647600,cg03329019,cg23647410,cg2…
chr1	221056792	221058910	2	Yes	gene body	HLX	No	8	cg17862903,cg08655206,cg10975889,cg12053004,cg26440142,cg15450098,cg09515921,cg02743632	8	cg17862903,cg08655206,cg10975889,cg12053004,cg26440142,cg15450098,cg09515921,cg02743632
chr1	221060002	221061934	2	Yes	intergenic	NA	No	8	cg06951677,cg13060624,cg27272235,cg26917694,cg26530319,cg21395577,cg23603194,cg07722657	7	cg06951677,cg13060624,cg27272235,cg26917694,cg26530319,cg21395577,cg07722657
chr1	221066545	221069985	2	Yes	intergenic	NA	No	13	cg07241917,cg21680980,cg26047066,cg25001102,cg15730491,cg04539515,cg14315054,cg14035969,cg18788664,cg16137147,cg11666559,cg07568307,cg18023943	11	cg07241917,cg26047066,cg25001102,cg04539515,cg14315054,cg14035969,cg16077599,cg25212493,cg11666559,cg07568307,cg18023943
chr1	221912945	221915363	3	No	promoter	DUSP10	Yes	4	cg22650146,cg17283139,cg24411314,cg05941778	7	cg22650146,cg17283139,cg24411314,cg15185249,cg03566223,cg09999560,cg21825196
chr1	223306600	223308559	3	No	promoter	TLR5	No	3	cg23039250,cg21695171,cg12095594	4	cg00073181,cg23039250,cg21695171,cg12095594
chr1	223315463	223317399	3	Yes	promoter	RP11-239E10.2,TLR5	No	12	cg01181681,cg23291900,cg07538512,cg05696109,cg00255925,cg17599809,cg20303021,cg12275981,cg03702975,cg09025215,cg05858079,cg14015211	12	cg01181681,cg02619544,cg23291900,cg07538512,cg05696109,cg00255925,cg17599809,cg20303021,cg12275981,cg03702975,cg05858079,cg14015211
chr1	223535696	223539164	3	Yes	promoter	SUSD4	No	12	cg18020547,cg03200052,cg21447550,cg08892600,cg00172597,cg07605211,cg12307840,cg15100599,cg10856813,cg04232325,cg12770149,cg26896499	14	cg18020547,cg03200052,cg21447550,cg08892600,cg00172597,cg07605211,cg12307840,cg15100599,cg10856813,cg04232325,cg23494458,cg12770149,cg26896499,cg03317987
chr1	223899386	223902329	1	Yes	promoter	CAPN2	Yes	12	cg05761882,cg07395969,cg18224445,cg13195218,cg05228802,cg24150051,cg07629844,cg22697825,cg00339319,cg01566170,cg14972271,cg08439122	15	cg10261864,cg05761882,cg07395969,cg18224445,cg13195218,cg05228802,cg17294376,cg04942197,cg24150051,cg07629844,cg22697825,cg00339319,cg01566170,cg14972271,cg08439122
chr1	224802867	224807165	2	Yes	promoter	CNIH3,RP11-100E13.1	Yes	15	cg05785805,cg17340519,cg15825731,cg13893543,cg01777643,cg07230107,cg00290506,cg25723050,cg02242289,cg23816049,cg03127713,cg21290042,cg00034433,cg08038504,cg09558034	15	cg05785805,cg17340519,cg15825731,cg13893543,cg01777643,cg00290506,cg25723050,cg23816049,cg03127713,cg21290042,cg13140317,cg11878641,cg00034433,cg08038504,cg09558034
chr1	225612918	225615594	3	Yes	promoter	LBR	Yes	5	cg05530459,cg11797209,cg11431720,cg02825765,cg24834199	5	cg05530459,cg11797209,cg11431720,cg02825765,cg24834199
chr1	225864601	225866145	3	Yes	intergenic	NA	No	4	cg01077274,cg14207589,cg16247183,cg02570888	4	cg01077274,cg14207589,cg16247183,cg02570888
chr1	226270169	226272200	3	Yes	promoter	RP11-396C23.2	No	7	cg16532282,cg04233686,cg04461388,cg04874113,cg06965961,cg01205584,cg00053851	7	cg16532282,cg04233686,cg04461388,cg04874113,cg06965961,cg01205584,cg00053851
chr1	226298035	226300552	3	Yes	intergenic	NA	Yes	6	cg10836509,cg20680802,cg17748520,cg05609059,cg26913398,cg10089647	6	cg10836509,cg20680802,cg17748520,cg05609059,cg26913398,cg10089647
chr1	226410150	226412495	3	Yes	promoter	MIXL1	No	13	cg02360862,cg15147516,cg06188229,cg22789900,cg26886972,cg24405179,cg26100711,cg23204021,cg18564989,cg19714913,cg18354264,cg11238820,cg25162270	14	cg02360862,cg15147516,cg06188229,cg22789900,cg26886972,cg24405179,cg26100711,cg09678193,cg11460359,cg18564989,cg19714913,cg18354264,cg11238820,cg25162270
chr1	226735333	226738646	2	Yes	promoter	C1orf95	Yes	15	cg04501840,cg25706060,cg14612915,cg05127440,cg21339969,cg07046852,cg16705351,cg01318248,cg03745431,cg15592945,cg20841596,cg14526750,cg14074443,cg23814988,cg02368587	16	cg25706060,cg14612915,cg05127440,cg21339969,cg07046852,cg16705351,cg01318248,cg03745431,cg15592945,cg27661128,cg26746533,cg20841596,cg14526750,cg14074443,cg23814988,cg02368587
chr1	226923603	226927963	2	Yes	promoter	ITPKB	Yes	19	cg03257293,cg13209122,cg19160520,cg05869122,cg11222527,cg11401257,cg22521948,cg02814998,cg24844313,cg04242667,cg18762243,cg01259619,cg04482794,cg16340268,cg14711690,cg05049329,cg00279406,cg23717186,cg05306109	20	cg03257293,cg13209122,cg19160520,cg17057452,cg05869122,cg11222527,cg24947555,cg11401257,cg23343458,cg22521948,cg24844313,cg18762243,cg01259619,cg04482794,cg16340268,cg14711690,cg05049329,cg00279406,cg23717186,cg05306109
chr1	227057574	227060091	3	Yes	promoter	PSEN2	No	9	cg05134019,cg25514304,cg05894797,cg26656022,cg03338380,cg21417192,cg03307360,cg00479101,cg20000641	12	cg25514304,cg05894797,cg19711882,cg26656022,cg03338380,cg21417192,cg03307360,cg21602555,cg00479101,cg23885325,cg20000641,cg11059171
chr1	227974545	227977582	3	Yes	intergenic	NA	Yes	10	cg24366968,cg03545246,cg01589779,cg07398594,cg17516889,cg03814022,cg22384904,cg05813995,cg11651614,cg06928246	12	cg24366968,cg05317063,cg03545246,cg01589779,cg07398594,cg17516889,cg03814022,cg11170610,cg22384904,cg05813995,cg11651614,cg06928246
chr1	228135654	228137177	3	Yes	promoter	WNT9A	No	7	cg26146562,cg05183226,cg23231462,cg11647690,cg06641299,cg07021033,cg14343890	6	cg05183226,cg23231462,cg11647690,cg06641299,cg07021033,cg14343890
chr1	228191776	228197321	2	Yes	promoter	WNT3A	No	17	cg13226669,cg10019916,cg26332740,cg17318529,cg11298786,cg18642177,cg09316122,cg05786840,cg08037440,cg01313514,cg05802452,cg01051310,cg13864473,cg26921638,cg09369927,cg20976159,cg02991924	19	cg13226669,cg14641911,cg10019916,cg26332740,cg17318529,cg11298786,cg18642177,cg09316122,cg05786840,cg08037440,cg01313514,cg27239612,cg05802452,cg01051310,cg13864473,cg26921638,cg09369927,cg20976159,cg02991924
chr1	228246121	228249353	3	Yes	gene body	WNT3A	No	9	cg05394663,cg27546066,cg11176493,cg26841013,cg23663760,cg09511896,cg09075558,cg12359809,cg15058266	8	cg05394663,cg27546066,cg26841013,cg23663760,cg09511896,cg09075558,cg12359809,cg15058266
chr1	228565379	228567750	3	Yes	gene body	OBSCN	No	9	cg18931977,cg06786773,cg19025525,cg03669282,cg25318301,cg06760305,cg15358752,cg20329210,cg19247726	8	cg18931977,cg06786773,cg19025525,cg03669282,cg25318301,cg06760305,cg15358752,cg20329210
chr1	228602872	228605256	3	Yes	promoter	TRIM17	No	11	cg04945350,cg20939768,cg24848599,cg18875460,cg23540518,cg01907584,cg11253514,cg02952008,cg02931001,cg26896787,cg27363486	14	cg04945350,cg20939768,cg24848599,cg18875460,cg23540518,cg01907584,cg03061239,cg14837544,cg11253514,cg02952008,cg02931001,cg08874372,cg04944802,cg27363486
chr1	228632732	228635246	3	Yes	intergenic	NA	Yes	9	cg16894439,cg24070990,cg26345105,cg00655913,cg25874119,cg26268636,cg02826237,cg22699044,cg09362335	10	cg16894439,cg24070990,cg26345105,cg20604380,cg00655913,cg25874119,cg26268636,cg02826237,cg22699044,cg09362335
chr1	228650716	228653730	1	Yes	promoter	MIR4666A	Yes	12	cg23239574,cg20411935,cg07101354,cg13799227,cg07726139,cg26911220,cg03041738,cg13242070,cg02058715,cg15261221,cg15726314,cg17866373	16	cg17994960,cg10536423,cg23239574,cg20411935,cg07101354,cg13799227,cg07726139,cg26911220,cg03041738,cg13242070,cg02058715,cg15261221,cg15726314,cg17866373,cg05881428,cg07022056
chr1	228782357	228785062	2	Yes	promoter	RNA5S17,RNA5SP18	Yes	5	cg26859841,cg01328119,cg10107958,cg19764421,cg17016830	9	cg20132805,cg26859841,cg25502288,cg21085371,cg02144797,cg01328119,cg10107958,cg19764421,cg17016830
chr1	228870233	228873776	3	Yes	promoter	RHOU	No	17	cg12762413,cg02057833,cg07838098,cg24531915,cg27437294,cg21503377,cg05962139,cg25725117,cg23010344,cg24885126,cg20845805,cg03099045,cg11431126,cg12127991,cg22517740,cg03145930,cg19319808	20	cg12762413,cg26677254,cg02057833,cg07838098,cg24531915,cg27437294,cg21503377,cg05962139,cg25725117,cg23010344,cg24885126,cg20845805,cg18968729,cg03099045,cg11431126,cg12127991,cg22517740,cg03145930,cg19319808,cg23239813
chr1	229542181	229544774	3	Yes	intergenic	NA	Yes	7	cg17035539,cg02628795,cg13850606,cg00817100,cg03940848,cg06585233,cg09938466	7	cg14574698,cg17035539,cg02628795,cg13850606,cg00817100,cg06585233,cg09938466
chr1	229566454	229571206	2	Yes	promoter	ACTA1	Yes	27	cg04900080,cg12908399,cg20025656,cg07777790,cg00064261,cg11689813,cg26163852,cg25792990,cg04030615,cg02767613,cg05347845,cg14852384,cg08652487,cg23597629,cg13547644,cg09926178,cg27229613,cg12341314,cg11668749,cg04568492,cg00034468,cg05353133,cg24104241,cg02970384,cg11589139,cg18343474,cg07117219	28	cg00061145,cg12908399,cg20025656,cg07777790,cg00064261,cg11689813,cg26163852,cg04030615,cg02767613,cg05347845,cg14852384,cg08652487,cg23597629,cg13547644,cg09926178,cg27229613,cg12918963,cg16940506,cg12341314,cg11668749,cg04568492,cg00034468,cg05353133,cg24104241,cg02970384,cg11589139,cg18343474,cg07117219
chr1	230203421	230205600	3	Yes	promoter	GALNT2	Yes	5	cg00923744,cg12840261,cg18122200,cg03525122,cg13769204	6	cg00923744,cg12840261,cg18122200,cg00550925,cg03525122,cg13769204
chr1	230557780	230561685	3	Yes	promoter	PGBD5	Yes	5	cg13620096,cg22430231,cg00000363,cg01004056,cg17039722	7	cg10693042,cg19984036,cg13620096,cg22430231,cg00000363,cg01004056,cg19500897
chr1	231002454	231004284	1	Yes	promoter	C1orf198	No	5	cg06837355,cg19082003,cg08005943,cg15745921,cg02206259	5	cg06837355,cg19082003,cg08005943,cg15745921,cg02206259
chr1	231173015	231177388	2	Yes	promoter	FAM89A	No	12	cg16516400,cg17199320,cg22172038,cg03432338,cg12450347,cg21577121,cg01720705,cg04292359,cg00679738,cg12274077,cg05578480,cg16908552	13	cg16516400,cg09513835,cg17199320,cg22172038,cg03432338,cg12450347,cg21577121,cg01720705,cg04292359,cg00679738,cg07656025,cg05578480,cg16908552
chr1	231296345	231299532	2	Yes	promoter	TRIM67	No	18	cg07850592,cg17137424,cg03350439,cg17102963,cg27504802,cg21178978,cg13881199,cg09150076,cg09308842,cg01328548,cg10504365,cg19806849,cg17095728,cg15104644,cg11192416,cg08855395,cg03538430,cg16368763	18	cg07850592,cg17137424,cg03350439,cg17102963,cg27504802,cg21178978,cg13881199,cg09150076,cg09308842,cg22667972,cg01328548,cg10504365,cg19806849,cg17095728,cg15104644,cg11192416,cg03538430,cg16368763
chr1	231554451	231558150	3	Yes	promoter	EGLN1	No	7	cg17142856,cg02988046,cg11637191,cg24868054,cg27510275,cg20015535,cg07040244	9	cg17142856,cg02988046,cg11637191,cg24868054,cg27510275,cg03079863,cg14337165,cg20015535,cg07040244
chr1	232763367	232765881	3	Yes	intergenic	NA	Yes	4	cg19305147,cg16026114,cg18222582,cg17163425	4	cg19305147,cg16026114,cg18222582,cg17163425
chr1	233463385	233466683	3	Yes	promoter	MLK4	No	6	cg27231188,cg25149069,cg13904493,cg20239099,cg01016694,cg20061722	7	cg27231188,cg25149069,cg13904493,cg20239099,cg01016694,cg12648511,cg20061722
chr1	233749787	233752624	3	Yes	promoter	KCNK1	Yes	5	cg13110283,cg23023466,cg17459431,cg11815363,cg00777689	6	cg13110283,cg25990200,cg23023466,cg17459431,cg11815363,cg00777689
chr1	234039495	234042249	3	Yes	promoter	SLC35F3	No	9	cg20784768,cg14009098,cg25437385,cg09424759,cg05051043,cg22685369,cg10878114,cg18115428,cg21396646	10	cg24296884,cg20784768,cg14009098,cg25437385,cg09424759,cg05051043,cg22685369,cg10878114,cg18115428,cg21396646
chr1	234348728	234351912	3	Yes	promoter	RP4-799P18.2,SLC35F3	No	11	cg08455719,cg13359765,cg25736663,cg13058819,cg10204807,cg09811123,cg10467711,cg16546432,cg00662647,cg10701282,cg07566700	12	cg08455719,cg13359765,cg25736663,cg10204807,cg09811123,cg10467711,cg00662647,cg10701282,cg17399619,cg25962682,cg21667736,cg07566700
chr1	235813561	235815190	1	Yes	promoter	GNG4	No	12	cg14099468,cg06173536,cg01712686,cg13455717,cg22941646,cg24454695,cg02780849,cg20818778,cg00043510,cg09649610,cg17816394,cg02328440	13	cg10866988,cg14099468,cg01712686,cg13455717,cg22941646,cg24454695,cg21895505,cg02023150,cg20818778,cg00043510,cg09649610,cg17816394,cg02328440
chr1	236226623	236229843	1	Yes	promoter	NID1	No	15	cg01206410,cg23028178,cg10966139,cg16549308,cg04837025,cg07157830,cg00095594,cg02957057,cg04507775,cg07479670,cg03185593,cg11228876,cg20688709,cg15963535,cg09281101	15	cg01206410,cg00912793,cg23028178,cg10966139,cg16549308,cg04837025,cg07157830,cg00095594,cg02957057,cg04507775,cg07479670,cg11228876,cg20688709,cg15963535,cg09281101
chr1	236303643	236308532	3	Yes	promoter	GPR137B	No	19	cg04077303,cg10981580,cg00874055,cg18879590,cg26534508,cg09169938,cg21434251,cg07757497,cg07102302,cg07425541,cg17269430,cg16505687,cg01436372,cg09258327,cg06867215,cg08473553,cg23646820,cg16044595,cg19249231	20	cg04077303,cg10981580,cg00874055,cg26534508,cg09169938,cg21434251,cg07757497,cg21796817,cg23705931,cg07102302,cg07425541,cg17269430,cg16505687,cg01436372,cg09258327,cg06867215,cg08473553,cg23646820,cg16044595,cg19249231
chr1	236443639	236445361	1	Yes	promoter	ERO1LB	No	7	cg07385821,cg15955291,cg07309943,cg20846212,cg21767703,cg15099643,cg00362285	6	cg07385821,cg15955291,cg07309943,cg21767703,cg15099643,cg00362285
chr1	236557470	236560333	1	Yes	promoter	EDARADD	Yes	15	cg00178850,cg04311403,cg15677293,cg09164898,cg15202123,cg12437148,cg02327465,cg23020486,cg23875264,cg14615868,cg09225230,cg04031361,cg09809672,cg02632362,cg16240480	17	cg00178850,cg04311403,cg15677293,cg09164898,cg15202123,cg12437148,cg02327465,cg23020486,cg23875264,cg14615868,cg14550672,cg09225230,cg09312999,cg04031361,cg09809672,cg26742280,cg16240480
chr1	236686178	236688711	3	Yes	promoter	LGALS8,LGALS8-AS1	No	15	cg22596738,cg25408632,cg18785873,cg13948413,cg01796143,cg06676847,cg09823395,cg24846594,cg23024228,cg13444964,cg08137948,cg09334514,cg18322510,cg05338187,cg01030476	22	cg26736918,cg06499830,cg10928063,cg02029708,cg24492862,cg13948413,cg06676847,cg20719069,cg09823395,cg24846594,cg13444964,cg16400094,cg06558640,cg03796549,cg08137948,cg14445518,cg14760424,cg09334514,cg25041207,cg18322510,cg01030476,cg19176897
chr1	236848907	236851155	3	Yes	promoter	ACTN2	No	9	cg10819259,cg18119735,cg21376883,cg20482698,cg18770350,cg11215976,cg14932016,cg10372476,cg16853982	10	cg10819259,cg18119735,cg21376883,cg20482698,cg18770350,cg11215976,cg19140682,cg14932016,cg10372476,cg16853982
chr1	237205456	237209131	3	Yes	promoter	RYR2	Yes	6	cg01968657,cg26956874,cg01157404,cg02328010,cg07914084,cg11657808	9	cg06262651,cg01968657,cg13476124,cg26956874,cg01157404,cg02328010,cg07914084,cg11657808,cg17689182
chr1	239548879	239552111	2	Yes	promoter	CHRM3	No	15	cg20408147,cg19238058,cg22344188,cg14429847,cg24666702,cg00371368,cg13570831,cg13985485,cg22017581,cg23684246,cg08542090,cg11158057,cg04412646,cg24998078,cg08502533	12	cg20408147,cg19238058,cg22344188,cg14429847,cg13570831,cg13985485,cg22017581,cg23684246,cg08542090,cg11158057,cg04412646,cg24998078
chr1	240254206	240257686	2	Yes	promoter	FMN2	No	14	cg13492364,cg03903246,cg06400704,cg15031661,cg24643282,cg05658491,cg17012160,cg22931725,cg25208017,cg02574509,cg01535698,cg19591056,cg15748490,cg12213260	18	cg13492364,cg03903246,cg06400704,cg15031661,cg24643282,cg05658491,cg12126037,cg17012160,cg22931725,cg25208017,cg01650149,cg20909821,cg00676246,cg19591056,cg13814414,cg15748490,cg17700903,cg12213260
chr1	240774018	240776184	3	No	promoter	GREM2	No	8	cg26155556,cg04539573,cg19356905,cg06353127,cg00155397,cg07808348,cg18592459,cg09107161	8	cg26155556,cg04539573,cg04737542,cg19356905,cg00155397,cg07808348,cg18592459,cg09107161
chr1	241519319	241521589	3	Yes	promoter	RGS7	No	11	cg18271538,cg24800810,cg03613077,cg24472496,cg07944863,cg24843474,cg13849378,cg21303386,cg14156405,cg06941335,cg11679177	12	cg18271538,cg24800810,cg03613077,cg24472496,cg07944863,cg02174680,cg24843474,cg13849378,cg21303386,cg14156405,cg06941335,cg11679177
chr1	241586630	241588389	3	Yes	promoter	RP11-527D7.1	No	8	cg00566297,cg16003102,cg15454726,cg01794473,cg09892426,cg10983199,cg26119543,cg06146698	10	cg00566297,cg16003102,cg21100291,cg15454726,cg12474159,cg09892426,cg10902270,cg10983199,cg26119543,cg06146698
chr1	242685573	242689505	3	Yes	promoter	PLD5	Yes	12	cg12613383,cg18789663,cg22679728,cg04205107,cg08659667,cg19719547,cg19205994,cg18220921,cg01664666,cg00812833,cg07137606,cg18181201	14	cg12613383,cg18789663,cg22679728,cg04205107,cg08659667,cg19719547,cg11167845,cg19205994,cg20883544,cg18220921,cg01664666,cg00812833,cg07137606,cg18181201
chr1	244079849	244082030	1	Yes	promoter	RP11-278H7.1	No	9	cg24718729,cg19743073,cg01311971,cg16049364,cg06785014,cg01656394,cg04295543,cg00705059,cg18085407	10	cg24718729,cg19743073,cg01311971,cg16049364,cg20719699,cg06785014,cg01656394,cg17867202,cg04295543,cg18085407
chr1	244212595	244214763	3	Yes	promoter	ZBTB18	Yes	10	cg23829949,cg01105418,cg13360230,cg15896892,cg12869659,cg19698993,cg16399365,cg14075221,cg02497700,cg26694028	8	cg23829949,cg01105418,cg15896892,cg12869659,cg19698993,cg16399365,cg02497700,cg26694028
chr1	244892547	244894964	1	Yes	intergenic	NA	Yes	8	cg23484899,cg06318402,cg20597013,cg08708599,cg11053304,cg01177928,cg20678442,cg12726120	7	cg23484899,cg06318402,cg08708599,cg11053304,cg01177928,cg20678442,cg12726120
chr1	245081488	245083036	3	No	intergenic	NA	Yes	3	cg27317265,cg17929645,cg15058956	5	cg11553257,cg10478429,cg27317265,cg17929645,cg15058956
chr1	245316145	245321444	2	Yes	promoter	KIF26B	No	22	cg09265377,cg18967361,cg06059663,cg18278247,cg02054059,cg03284440,cg19252551,cg13888026,cg27519942,cg12054521,cg01787565,cg09065617,cg11586600,cg06352443,cg00710004,cg13953828,cg04109349,cg16660237,cg03320441,cg13296163,cg07124903,cg11930609	22	cg09265377,cg18967361,cg06059663,cg18278247,cg02054059,cg03284440,cg19252551,cg13888026,cg27519942,cg12054521,cg08616392,cg01787565,cg11586600,cg06352443,cg01887542,cg13953828,cg04109349,cg16660237,cg03320441,cg13296163,cg07124903,cg11930609
chr1	246886587	246889014	1	Yes	promoter	SCCPDH	No	10	cg26361329,cg00755836,cg22475246,cg26309691,cg06946154,cg23613205,cg20478514,cg17427154,cg15210596,cg08261858	11	cg26361329,cg00755836,cg22475246,cg26309691,cg06946154,cg23613205,cg20478514,cg17427154,cg15210596,cg00452522,cg10913959
chr1	247273781	247276377	3	Yes	promoter	C1orf229	No	14	cg19623519,cg22446000,cg02578321,cg11316386,cg12432038,cg12181101,cg00821073,cg25549141,cg23695504,cg18174258,cg11856822,cg03408556,cg10147027,cg24297800	16	cg19623519,cg22446000,cg02578321,cg17885487,cg11316386,cg15236082,cg12432038,cg12181101,cg00821073,cg25549141,cg23695504,cg18174258,cg11856822,cg03408556,cg10147027,cg24297800
chr1	247802025	247803894	3	Yes	promoter	RP11-634B7.4,RP11-978I15.10	No	9	cg09674469,cg03221390,cg00318631,cg25007722,cg15829088,cg25017620,cg25220063,cg02518135,cg27543040	12	cg26059684,cg09674469,cg03221390,cg00318631,cg25007722,cg07200344,cg15829088,cg25017620,cg25220063,cg02518135,cg27543040,cg26773293
chr1	249156512	249158546	3	No	gene body	AL672294.1	Yes	2	cg10485768,cg03108496	2	cg10485768,cg03108496
chr2	43663	47935	3	Yes	promoter	FAM110C	No	12	cg09563102,cg23574281,cg15574509,cg20318662,cg27106476,cg15850520,cg23548885,cg01880096,cg14255256,cg19145730,cg15237857,cg07058971	22	cg09563102,cg23574281,cg15574509,cg20318662,cg27106476,cg15850520,cg23548885,cg18876145,cg13187130,cg12516752,cg12937150,cg04252744,cg24968425,cg09796908,cg01880096,cg14255256,cg19145730,cg16533785,cg15237857,cg07058971,cg01109729,cg10889138
chr2	262306	264596	3	Yes	promoter	ACP1,SH3YL1	No	9	cg25945732,cg00108164,cg20749741,cg21825027,cg03468349,cg10181419,cg13354988,cg26398848,cg12147994	11	cg00114724,cg25945732,cg00108164,cg20749741,cg21825027,cg03468349,cg11195259,cg13354988,cg26398848,cg07045570,cg17500664
chr2	284354	290653	3	Yes	promoter	AC079779.4,FAM150B	Yes	16	cg11432790,cg03468249,cg17109036,cg09985832,cg18642499,cg08856347,cg07800384,cg13507506,cg02736505,cg08677375,cg13137176,cg18208842,cg05738152,cg06905130,cg25710298,cg19588432	25	cg11432790,cg03468249,cg17109036,cg09985832,cg18642499,cg08856347,cg07800384,cg13507506,cg02736505,cg08677375,cg13137176,cg13556539,cg18208842,cg22802194,cg05738152,cg06905130,cg07715844,cg04502548,cg05159810,cg25710298,cg08983281,cg01912166,cg18607869,cg26741224,cg19588432
chr2	467394	469303	3	Yes	intergenic	NA	No	10	cg08031492,cg13973086,cg26349358,cg22490454,cg04709035,cg16073378,cg20754261,cg13699355,cg06380356,cg18985828	9	cg13973086,cg26349358,cg22490454,cg04709035,cg16073378,cg20754261,cg13699355,cg06380356,cg18985828
chr2	946575	949064	3	Yes	promoter	AC116614.1,SNTG2	No	7	cg11691429,cg20193363,cg23953176,cg11612266,cg16179952,cg06865612,cg09426834	6	cg11691429,cg20193363,cg23953176,cg11612266,cg06865612,cg09426834
chr2	5813000	5814782	3	Yes	gene body	AC107057.2,AC108025.2	No	4	cg23883058,cg17213402,cg13687996,cg15309953	4	cg23883058,cg17213402,cg13687996,cg15309953
chr2	5832643	5834718	1	Yes	promoter	SOX11	No	7	cg16330247,cg20401252,cg24837370,cg18863333,cg20008332,cg08165221,cg18449120	7	cg16330247,cg20401252,cg24837370,cg18863333,cg20008332,cg08165221,cg18449120
chr2	7004585	7007134	3	Yes	promoter	CMPK2,RSAD2	No	11	cg24935042,cg25494151,cg13452400,cg25396690,cg27218469,cg18887033,cg00137156,cg27051171,cg11044724,cg07466433,cg16719845	15	cg14595557,cg24935042,cg25494151,cg07051894,cg13452400,cg25396690,cg27218469,cg18887033,cg00137156,cg27051171,cg06959746,cg01291548,cg11044724,cg07466433,cg16719845
chr2	7056825	7058697	1	Yes	promoter	RNF144A,RNF144A-AS1	No	12	cg06023570,cg04174211,cg05648183,cg03065975,cg05984191,cg13051968,cg25705900,cg12498522,cg01611886,cg09064070,cg01148088,cg16725094	10	cg04174211,cg05648183,cg03065975,cg05984191,cg25705900,cg12498522,cg26927480,cg09064070,cg01148088,cg16725094
chr2	8815881	8818837	2	Yes	promoter	AC011747.7,ID2	Yes	10	cg03022921,cg10883171,cg27527593,cg18793799,cg03869928,cg21946006,cg12515366,cg16345795,cg25602536,cg00782839	14	cg20285140,cg10883171,cg27527593,cg18793799,cg02650855,cg03869928,cg21946006,cg12515366,cg16345795,cg25602536,cg00782839,cg03703248,cg18908335,cg19082218
chr2	8819151	8820953	3	Yes	promoter	AC011747.7,ID2	No	2	cg01365608,cg00879141	6	cg13206583,cg06676511,cg01365608,cg00879141,cg21772679,cg17339614
chr2	8822055	8825959	3	Yes	promoter	AC011747.7,ID2	No	14	cg06659057,cg00619356,cg01495174,cg14274621,cg01184784,cg04525491,cg20495404,cg00538370,cg22995114,cg14984257,cg13055278,cg17086808,cg02347832,cg14657818	13	cg06659057,cg01495174,cg14274621,cg01184784,cg04525491,cg20495404,cg00538370,cg22995114,cg14984257,cg13055278,cg17086808,cg02347832,cg14657818
chr2	9345311	9346770	1	Yes	promoter	ASAP2	No	6	cg19105810,cg16430616,cg00536383,cg03424478,cg22190705,cg07815287	7	cg19105810,cg16430616,cg00536383,cg03424478,cg22190705,cg07815287,cg23656103
chr2	9346889	9349300	1	Yes	promoter	ASAP2	Yes	4	cg01155190,cg19991899,cg10236037,cg03077836	3	cg01155190,cg19991899,cg03077836
chr2	9771334	9773062	3	Yes	promoter	YWHAQ	No	4	cg15748006,cg23401684,cg06701500,cg07793203	7	cg09185679,cg15748006,cg02453827,cg23401684,cg06701500,cg07793203,cg01491794
chr2	10089999	10091643	3	Yes	promoter	GRHL1	No	3	cg14020129,cg14124917,cg01570972	4	cg14020129,cg14124917,cg15273607,cg11495835
chr2	10091787	10093210	3	Yes	promoter	GRHL1	No	3	cg18761223,cg16773799,cg16227131	4	cg00573821,cg18761223,cg16773799,cg16227131
chr2	10218790	10221758	3	Yes	promoter	CYS1	No	11	cg10425361,cg25946605,cg23058177,cg23153655,cg15496063,cg05312077,cg13499966,cg13406896,cg08167066,cg25868769,cg02984430	11	cg10425361,cg25946605,cg23153655,cg15496063,cg05312077,cg13499966,cg13406896,cg26941949,cg08167066,cg25868769,cg02984430
chr2	10442970	10445505	2	Yes	promoter	HPCAL1	No	14	cg18969008,cg16246488,cg18022012,cg09464137,cg00238897,cg06805572,cg13023681,cg17097992,cg11594217,cg06621309,cg06349981,cg12346749,cg13154104,cg25743719	14	cg18969008,cg16246488,cg18022012,cg09464137,cg00238897,cg06805572,cg13023681,cg20274466,cg17097992,cg06621309,cg06349981,cg12346749,cg13154104,cg25743719
chr2	10588618	10590769	1	Yes	promoter	ODC1,RP11-320M2.1	No	4	cg23762633,cg02085210,cg05741384,cg14276772	10	cg10000813,cg25091134,cg21597416,cg11321121,cg02085210,cg06408248,cg05741384,cg20178231,cg00916030,cg14276772
chr2	10860710	10863067	3	Yes	promoter	ATP6V1C2	No	10	cg21879157,cg22243662,cg11274233,cg09296611,cg03967192,cg21076935,cg22834096,cg14035550,cg00454409,cg14580982	10	cg21879157,cg22243662,cg11274233,cg09296611,cg03967192,cg22834096,cg14035550,cg00454409,cg14580982,cg11205166
chr2	11051152	11053278	3	Yes	promoter	KCNF1	No	9	cg16163981,cg05633391,cg26267678,cg22085335,cg03402876,cg24885082,cg03038132,cg02322908,cg18639125	9	cg16163981,cg05633391,cg26267678,cg12229832,cg16386744,cg03402876,cg24885082,cg02322908,cg18639125
chr2	11621519	11624670	1	Yes	intergenic	NA	Yes	6	cg21248928,cg22811233,cg19518308,cg13434975,cg12808347,cg23234622	4	cg21248928,cg22811233,cg19518308,cg23234622
chr2	14771789	14776474	2	Yes	promoter	AC011897.1,FAM84A	No	23	cg18176842,cg00478246,cg02311414,cg11533098,cg05602862,cg13021841,cg25765130,cg11007759,cg16234966,cg26633107,cg23062198,cg16846645,cg14789259,cg06545361,cg12050497,cg02746381,cg05446424,cg20720059,cg14225485,cg07622996,cg10138494,cg04063216,cg22044566	28	cg18176842,cg00478246,cg09823744,cg11533098,cg00876051,cg05602862,cg13021841,cg25765130,cg00680918,cg11007759,cg16234966,cg17103169,cg24180340,cg26633107,cg23062198,cg16846645,cg14789259,cg06545361,cg12050497,cg02746381,cg05446424,cg20720059,cg17708472,cg14225485,cg07622996,cg10138494,cg04063216,cg22044566
chr2	16688672	16690329	3	Yes	intergenic	NA	No	4	cg01414014,cg21029761,cg09580478,cg17418743	3	cg01414014,cg21029761,cg09580478
chr2	18058345	18062158	1	Yes	promoter	KCNS3	No	17	cg26119806,cg10265016,cg11121846,cg03427543,cg16832267,cg20940661,cg24890054,cg01555853,cg07629187,cg23986335,cg20673481,cg09282497,cg27365825,cg14482308,cg19024632,cg23531340,cg11999255	20	cg26119806,cg13487054,cg10265016,cg03427543,cg16832267,cg20940661,cg24890054,cg21145290,cg07629187,cg23986335,cg20673481,cg09282497,cg27365825,cg19024632,cg12409425,cg16791057,cg23126099,cg23531340,cg02706365,cg11999255
chr2	19546519	19548754	1	Yes	promoter	MIR4757	Yes	4	cg17314700,cg16885702,cg25609649,cg13611499	6	cg25609649,cg13611499,cg02511750,cg18672759,cg01500427,cg11928146
chr2	19549630	19552582	2	Yes	gene body	OSR1	No	7	cg26701390,cg17097782,cg12619940,cg07531268,cg27117509,cg06496728,cg01230320	5	cg17097782,cg07531268,cg27117509,cg06496728,cg01230320
chr2	19555230	19559544	2	Yes	promoter	OSR1	No	14	cg21619325,cg01128642,cg06509239,cg19226872,cg04690395,cg15237819,cg14157048,cg02742971,cg05974067,cg01323049,cg03489023,cg10521706,cg22478121,cg20707692	19	cg21619325,cg10978282,cg01128642,cg06509239,cg19226872,cg16418862,cg04690395,cg15237819,cg14157048,cg02742971,cg12834328,cg01323049,cg03489023,cg09162333,cg11950994,cg02101523,cg10521706,cg23215476,cg22478121
chr2	19560606	19563778	2	Yes	intergenic	NA	Yes	15	cg06225840,cg21365298,cg27257137,cg01732449,cg17181167,cg14210681,cg04697622,cg15548588,cg24226138,cg03618256,cg01196788,cg06530338,cg24879782,cg16361302,cg11726648	14	cg21365298,cg27257137,cg01732449,cg17181167,cg14210681,cg04697622,cg15548588,cg24226138,cg03618256,cg01196788,cg06530338,cg24879782,cg16361302,cg09450907
chr2	20067982	20069470	3	Yes	promoter	LINC00954	No	6	cg11531339,cg09336406,cg24770624,cg25947878,cg13491250,cg15844871	7	cg11531339,cg09336406,cg24770624,cg25947878,cg13491250,cg15844871,cg17242556
chr2	20211103	20213926	1	Yes	promoter	MATN3	No	13	cg10334703,cg12783491,cg17427096,cg09218354,cg14771954,cg18705408,cg00261781,cg00462460,cg12299199,cg21177096,cg03801179,cg24416238,cg01931792	16	cg17851037,cg12806822,cg05177637,cg10334703,cg12783491,cg17427096,cg09218354,cg14771954,cg18705408,cg00261781,cg00462460,cg12299199,cg21177096,cg03801179,cg24416238,cg01931792
chr2	20305995	20307221	3	No	promoter	AC098828.2	No	2	cg06233043,cg26636010	3	cg13474332,cg06233043,cg26636010
chr2	20646710	20651038	3	Yes	promoter	AC023137.2,RHOB	No	12	cg21482674,cg01703736,cg25432336,cg16258854,cg25840926,cg07956897,cg10708221,cg01419675,cg06874767,cg20839034,cg20718643,cg19594691	15	cg05904364,cg10936796,cg21482674,cg15078203,cg01703736,cg25432336,cg16258854,cg25840926,cg07956897,cg10708221,cg01419675,cg06874767,cg20839034,cg20718643,cg19594691
chr2	20864542	20868205	2	Yes	promoter	GDF7	No	15	cg12949975,cg03753681,cg18946478,cg20752795,cg07966910,cg12266953,cg19113641,cg21039778,cg09150450,cg25160978,cg05899618,cg18552861,cg19500479,cg23719318,cg17128417	14	cg03753681,cg18946478,cg20752795,cg07966910,cg12266953,cg19113641,cg21039778,cg09150450,cg25160978,cg05899618,cg18552861,cg19500479,cg23719318,cg17128417
chr2	20870649	20872890	2	Yes	gene body	GDF7	No	6	cg04082016,cg07021052,cg10553204,cg12334488,cg10687131,cg14780466	6	cg04082016,cg07021052,cg10553204,cg12334488,cg10687131,cg14780466
chr2	21265814	21267729	3	Yes	promoter	APOB	No	14	cg26112457,cg15246511,cg07636176,cg25123895,cg25071744,cg03350299,cg24309555,cg16306978,cg16723488,cg00673290,cg05337441,cg25035485,cg04639062,cg19459542	15	cg26112457,cg15246511,cg07636176,cg25123895,cg25071744,cg03350299,cg24309555,cg16306978,cg16723488,cg17067405,cg00673290,cg05337441,cg25035485,cg04639062,cg19459542
chr2	23607040	23610617	2	Yes	promoter	KLHL29	Yes	8	cg17384897,cg18984486,cg10077706,cg10999479,cg02551244,cg16149238,cg04449785,cg10890199	7	cg18984486,cg10077706,cg02551244,cg16149238,cg04449785,cg18017265,cg10890199
chr2	24232101	24234041	1	Yes	promoter	MFSD2B	No	17	cg21356710,cg12565126,cg19273694,cg12449528,cg25044817,cg09154978,cg09066338,cg23220551,cg15871441,cg13259296,cg02687055,cg08134053,cg19805311,cg21129641,cg19572014,cg03480346,cg15405397	14	cg21356710,cg19273694,cg12449528,cg09154978,cg09066338,cg23220551,cg13259296,cg02687055,cg08134053,cg19805311,cg21129641,cg19572014,cg03480346,cg15405397
chr2	24345191	24347565	1	Yes	promoter	FAM228B,PFN4,RP11-507M3.1	No	11	cg17081976,cg04461705,cg23056047,cg03280113,cg04076037,cg18740718,cg17497419,cg08063864,cg07265300,cg01003959,cg27092869	15	cg20322447,cg17081976,cg08986196,cg04461705,cg23056047,cg03280113,cg04076037,cg18740718,cg27343007,cg17497419,cg08063864,cg07265300,cg01003959,cg26518134,cg27092869
chr2	24581596	24583481	1	Yes	promoter	ITSN2	No	8	cg14682878,cg17808994,cg18920904,cg13755512,cg06675496,cg08081869,cg02505199,cg02868976	5	cg14682878,cg13755512,cg06675496,cg08081869,cg02868976
chr2	24714486	24716547	3	Yes	promoter	NCOA1	No	4	cg11380327,cg23006163,cg15477048,cg05113623	7	cg11380327,cg23006163,cg07666211,cg25417913,cg22623549,cg15477048,cg05113623
chr2	25265126	25266987	3	Yes	promoter	EFR3B	No	5	cg06498328,cg18530075,cg13899529,cg04698434,cg21357024	6	cg06498328,cg18530075,cg13899529,cg13265513,cg04698434,cg21357024
chr2	25390268	25392370	3	Yes	promoter	POMC	No	17	cg09916783,cg08030082,cg16302441,cg22900229,cg17736230,cg24425171,cg00674304,cg01926269,cg20387815,cg13025668,cg00293936,cg24718866,cg23598419,cg09672383,cg02079741,cg03560973,cg09527270	16	cg09916783,cg08030082,cg16302441,cg22900229,cg24425171,cg00674304,cg01926269,cg20387815,cg13025668,cg06904565,cg00293936,cg24718866,cg09672383,cg02079741,cg03560973,cg09527270
chr2	26395905	26398029	3	Yes	promoter	GAREML	No	4	cg12717533,cg06834506,cg11691298,cg06476344	5	cg12717533,cg06834506,cg11691298,cg06476344,cg11150827
chr2	26406597	26409116	1	Yes	promoter	GAREML	No	7	cg19712391,cg17995197,cg08570472,cg10927841,cg22893791,cg25949338,cg19402238	6	cg19712391,cg17995197,cg08570472,cg10927841,cg22893791,cg19402238
chr2	26915058	26917074	3	Yes	promoter	KCNK3	No	9	cg25117841,cg20955989,cg01643580,cg18101022,cg17263061,cg01805869,cg18327056,cg20491914,cg05782445	9	cg25117841,cg20955989,cg01643580,cg18101022,cg17263061,cg01805869,cg18327056,cg20491914,cg05782445
chr2	27068889	27073504	3	Yes	promoter	DPYSL5	Yes	19	cg08802533,cg12368169,cg06167664,cg06103654,cg07636846,cg25121609,cg26195812,cg24068299,cg10713073,cg20730894,cg01519714,cg17029156,cg09153930,cg12045002,cg09704217,cg18920368,cg09448707,cg00216024,cg23153669	21	cg08802533,cg12368169,cg14483208,cg06167664,cg06103654,cg07636846,cg25121609,cg26195812,cg24068299,cg17712807,cg19171121,cg10713073,cg01519714,cg17029156,cg09153930,cg12045002,cg09704217,cg18920368,cg09448707,cg00216024,cg23153669
chr2	27165173	27166847	3	No	gene body	DPYSL5	No	5	cg18990157,cg14455516,cg02952978,cg27443598,cg23332900	4	cg18990157,cg14455516,cg02952978,cg23332900
chr2	27340620	27342605	3	Yes	promoter	CGREF1	No	8	cg05062694,cg06112415,cg17682441,cg18045575,cg07549406,cg14534987,cg10660909,cg22740783	10	cg05062694,cg06112415,cg06446719,cg17682441,cg20476087,cg18045575,cg07549406,cg14534987,cg27296547,cg22740783
chr2	27345742	27347574	3	Yes	promoter	ABHD1	No	8	cg03315230,cg21560413,cg06829893,cg11845159,cg20353465,cg26945050,cg25101396,cg21468035	11	cg03315230,cg18053225,cg06829893,cg11845159,cg20353465,cg00216116,cg26945050,cg21025280,cg25101396,cg21468035,cg07201791
chr2	27483961	27488757	2	Yes	promoter	SLC30A3	No	17	cg04412116,cg18006626,cg01706819,cg18219563,cg13875111,cg24416973,cg02915746,cg03875195,cg01878321,cg03023068,cg10629682,cg23151303,cg13174651,cg19461344,cg09958967,cg11226148,cg08789022	18	cg04412116,cg18006626,cg01706819,cg18219563,cg13875111,cg24416973,cg02915746,cg06720879,cg00510859,cg01878321,cg03023068,cg10629682,cg23151303,cg13174651,cg19461344,cg11226148,cg18470680,cg08789022
chr2	27528707	27531861	2	Yes	promoter	UCN	No	19	cg09065714,cg20442078,cg22129545,cg21752601,cg05113927,cg13833437,cg04527918,cg05231308,cg07537370,cg06536868,cg20028470,cg26123256,cg19535672,cg01454215,cg07872868,cg01985390,cg20842253,cg17689799,cg05901357	20	cg07245818,cg09065714,cg20442078,cg22129545,cg21752601,cg05113927,cg13833437,cg04527918,cg05231308,cg06536868,cg20028470,cg26123256,cg19535672,cg01454215,cg07872868,cg01985390,cg20842253,cg17689799,cg05901357,cg04143033
chr2	27716498	27719172	1	Yes	promoter	FNDC4,GCKR	No	10	cg15062470,cg20229788,cg00835771,cg08151750,cg04015759,cg20369763,cg27580026,cg22732812,cg17918501,cg00360324	11	cg15062470,cg20229788,cg00835771,cg25007834,cg08499094,cg08151750,cg04015759,cg20369763,cg22732812,cg17918501,cg00360324
chr2	28611922	28614889	1	Yes	promoter	FOSL2	No	8	cg08351105,cg11133114,cg24011637,cg02013274,cg25656144,cg14118453,cg15294607,cg17952719	7	cg08351105,cg11133114,cg24011637,cg02013274,cg14118453,cg15294607,cg17952719
chr2	28615815	28619576	3	Yes	promoter	AC104695.3,FOSL2,RP11-373D23.2	No	8	cg24397007,cg08836542,cg25784219,cg23522611,cg09588961,cg07063870,cg07342545,cg02280908	12	cg09980781,cg05042705,cg24431964,cg25784219,cg04608193,cg15352841,cg23522611,cg11963452,cg09588961,cg07063870,cg07342545,cg02280908
chr2	29032733	29034494	3	Yes	promoter	RP11-713D19.1,SPDYA	No	6	cg26502666,cg04786857,cg13546935,cg06816106,cg14044057,cg20541961	9	cg26502666,cg04786857,cg13546935,cg14920003,cg06816106,cg14044057,cg20093476,cg20541961,cg05904630
chr2	29337406	29339766	3	Yes	promoter	CLIP4	Yes	14	cg26052635,cg05038216,cg21972382,cg02774855,cg08808128,cg03135351,cg23255835,cg23428985,cg13257636,cg25737323,cg06333058,cg09695033,cg07285673,cg01777397	17	cg01384943,cg26052635,cg05038216,cg21972382,cg02774855,cg08808128,cg03135351,cg23255835,cg23428985,cg13257636,cg25737323,cg06333058,cg09695033,cg07285673,cg01777397,cg05819240,cg15747402
chr2	30142391	30145365	3	Yes	promoter	ALK	No	15	cg06611768,cg20311261,cg18022777,cg12740757,cg14163665,cg25999722,cg13552710,cg06905692,cg18277754,cg12976501,cg07443217,cg02355885,cg10179251,cg00643897,cg02165692	19	cg06611768,cg01297921,cg27068678,cg20311261,cg18022777,cg12740757,cg14163665,cg25999722,cg13552710,cg06905692,cg18277754,cg12976501,cg05437741,cg07443217,cg12164079,cg02355885,cg10179251,cg00643897,cg02165692
chr2	30452989	30457636	1	Yes	promoter	LBH	No	14	cg17250262,cg09682913,cg05924212,cg26571942,cg20662616,cg25072436,cg08033284,cg01626477,cg13460277,cg02233216,cg02547025,cg04092762,cg04253876,cg03801871	17	cg17250262,cg09682913,cg05924212,cg26571942,cg05587288,cg04766250,cg07786607,cg20662616,cg25072436,cg08033284,cg02233216,cg02547025,cg04092762,cg04253876,cg09199129,cg03801871,cg25532922
chr2	30669396	30671576	1	Yes	promoter	LCLAT1	No	13	cg04768958,cg25140066,cg15175514,cg17284481,cg10995359,cg12835981,cg10874102,cg04351272,cg07150166,cg03795903,cg17749961,cg15652532,cg12454169	14	cg04768958,cg25140066,cg15175514,cg17284481,cg10995359,cg10874102,cg19033026,cg04351272,cg07150166,cg03795903,cg17749961,cg15652532,cg10326673,cg12454169
chr2	31359645	31362120	3	Yes	promoter	GALNT14	No	13	cg22996440,cg27309383,cg20599798,cg26988215,cg14514751,cg22395019,cg04050000,cg10258271,cg24597158,cg05714219,cg03279535,cg21583226,cg17333242	17	cg07997987,cg22996440,cg27309383,cg20599798,cg26988215,cg14514751,cg22395019,cg04050000,cg10258271,cg24597158,cg05714219,cg06570027,cg19849093,cg22513591,cg03279535,cg21583226,cg17333242
chr2	31804659	31806684	2	Yes	promoter	SRD5A2	No	9	cg11765362,cg06492144,cg15403517,cg08894761,cg26638505,cg18529845,cg18948125,cg19502744,cg14174946	11	cg11765362,cg06492144,cg02049734,cg15403517,cg08894761,cg26638505,cg26261627,cg18529845,cg18948125,cg19502744,cg14174946
chr2	37550662	37553418	1	Yes	promoter	AC007391.2,PRKD3	No	7	cg04696149,cg19911844,cg02473084,cg07961416,cg23399173,cg14427233,cg18261413	12	cg04696149,cg26827737,cg16970667,cg16716968,cg24826988,cg03736472,cg19911844,cg14079149,cg02473084,cg07961416,cg23399173,cg14427233
chr2	37570723	37572847	3	Yes	promoter	QPCT	No	12	cg20091297,cg12040278,cg17304496,cg11444198,cg17594241,cg08786077,cg15162392,cg20647735,cg09839443,cg22629987,cg08240529,cg09386458	11	cg20091297,cg12040278,cg17304496,cg11444198,cg08786077,cg15162392,cg09839443,cg22629987,cg22039594,cg08240529,cg09386458
chr2	38299870	38305237	2	Yes	promoter	CYP1B1,CYP1B1-AS1	No	36	cg26144569,cg21715189,cg05062676,cg12802310,cg08620474,cg24720192,cg16248783,cg09456297,cg03648789,cg09130556,cg07301433,cg26036993,cg08761102,cg22488859,cg23549225,cg06861880,cg01936270,cg07380506,cg07057636,cg16060486,cg01834566,cg14957547,cg25856383,cg18451022,cg07078841,cg23151000,cg16439198,cg11751707,cg03890222,cg01410359,cg09799983,cg20254225,cg06264984,cg00565882,cg20408276,cg02162897	37	cg26144569,cg21715189,cg05062676,cg12802310,cg08620474,cg24720192,cg16248783,cg09456297,cg03648789,cg09130556,cg07301433,cg26036993,cg08761102,cg22488859,cg23549225,cg06861880,cg01936270,cg07380506,cg07057636,cg16060486,cg01834566,cg14957547,cg25856383,cg18451022,cg07078841,cg23151000,cg16439198,cg11735238,cg03890222,cg01410359,cg09799983,cg20254225,cg01103387,cg06264984,cg00565882,cg20408276,cg0…
chr2	38324437	38327128	3	No	promoter	CYP1B1-AS1	No	1	cg06202585	5	cg00958775,cg06202585,cg04198471,cg18163683,cg03447603
chr2	39891732	39894959	3	Yes	promoter	TMEM178A	Yes	11	cg12035699,cg11229533,cg25612183,cg04104114,cg21553524,cg22373181,cg19935171,cg10708761,cg18968196,cg02886589,cg00034559	12	cg23396189,cg12035699,cg11229533,cg25612183,cg04104114,cg21553524,cg22373181,cg19935171,cg10708761,cg18968196,cg00034559,cg25872015
chr2	40677183	40680522	3	Yes	promoter	SLC8A1	Yes	10	cg14411266,cg03307465,cg14686012,cg09021626,cg20227806,cg12748607,cg12742937,cg10633958,cg23601376,cg00610991	11	cg09201737,cg14411266,cg03307465,cg14686012,cg10571887,cg20227806,cg12748607,cg12742937,cg10633958,cg23601376,cg00610991
chr2	42275471	42278409	3	No	promoter	PKDCC	Yes	5	cg22476504,cg25353287,cg13773247,cg18882156,cg12630082	6	cg22476504,cg25353287,cg13773247,cg18882156,cg12630082,cg06198088
chr2	42717554	42722456	3	Yes	promoter	KCNG3,MTA3	No	14	cg12330998,cg17154057,cg21041181,cg13787029,cg05607127,cg15369743,cg05759424,cg00747290,cg27553955,cg06638795,cg04580179,cg21129729,cg08398288,cg08834057	18	cg12330998,cg15200793,cg17154057,cg21041181,cg05607127,cg26682557,cg17599990,cg15369743,cg18488631,cg05759424,cg11128799,cg00747290,cg27553955,cg15284655,cg06638795,cg04580179,cg21129729,cg08834057
chr2	43018717	43021761	1	Yes	promoter	HAAO	Yes	12	cg06913600,cg05986933,cg17246140,cg01561916,cg09480054,cg27299406,cg26360792,cg08421126,cg09368936,cg20857709,cg20289949,cg09256201	12	cg06913600,cg05986933,cg17246140,cg01561916,cg09480054,cg27299406,cg26360792,cg08421126,cg26907578,cg20857709,cg20289949,cg09256201
chr2	43863702	43865869	1	Yes	promoter	PLEKHH2	No	13	cg15754153,cg15523958,cg18856652,cg06227171,cg12617935,cg15695852,cg21926465,cg22475025,cg21344989,cg09067818,cg16864139,cg11659317,cg00820919	11	cg15754153,cg15523958,cg18856652,cg12617935,cg21926465,cg22475025,cg01605419,cg09067818,cg16864139,cg11659317,cg00820919
chr2	44058350	44059918	3	Yes	gene body	ABCG5	No	5	cg15889012,cg04221886,cg18303215,cg14583675,cg13591352	7	cg22395779,cg11532609,cg15889012,cg04221886,cg18303215,cg14583675,cg13591352
chr2	45027282	45031253	1	Yes	intergenic	NA	Yes	17	cg25149238,cg25093813,cg06100854,cg14014796,cg01576677,cg16077248,cg13732857,cg19922825,cg19893751,cg20536041,cg00028211,cg09760908,cg10069809,cg13441058,cg05961294,cg03593578,cg01465617	12	cg25093813,cg14014796,cg13732857,cg19922825,cg19893751,cg00028211,cg09760908,cg10069809,cg13441058,cg05961294,cg03593578,cg01465617
chr2	45031290	45033979	3	No	intergenic	NA	No	1	cg01883635	2	cg01883635,cg04093751
chr2	45152677	45158258	2	Yes	gene body	RP11-89K21.1	No	15	cg13905258,cg23424933,cg22884656,cg18969232,cg17980283,cg02442509,cg17470067,cg14168530,cg07514703,cg06497668,cg14868994,cg10963518,cg10939691,cg19025113,cg02657654	14	cg13905258,cg23424933,cg22884656,cg18969232,cg17980283,cg02442509,cg14168530,cg07514703,cg06497668,cg14868994,cg10963518,cg10939691,cg19025113,cg02657654
chr2	45159124	45173891	2	Yes	promoter	RP11-89K21.1,SIX3,SIX3-AS1	Yes	61	cg02863169,cg08456817,cg23245620,cg16509777,cg03717442,cg08696165,cg00097146,cg02649597,cg23306526,cg02120584,cg04797742,cg13975344,cg25104437,cg10832938,cg14673618,cg02147764,cg19186145,cg23808946,cg13163729,cg22437074,cg05740609,cg26491213,cg19148866,cg09615101,cg06622151,cg02372786,cg21199165,cg00787022,cg07258009,cg12130211,cg26734287,cg03353926,cg04640971,cg15393275,cg11218954,cg03377610,cg2…	69	cg02863169,cg08456817,cg23245620,cg16509777,cg03717442,cg04535320,cg08696165,cg00097146,cg23306526,cg02120584,cg04797742,cg25104437,cg14673618,cg19186145,cg23808946,cg13163729,cg22437074,cg05740609,cg26491213,cg19148866,cg04759874,cg09615101,cg06622151,cg02372786,cg10454912,cg21199165,cg11945128,cg11008210,cg27393201,cg00787022,cg07258009,cg23780966,cg12130211,cg26734287,cg03353926,cg17424452,cg0…
chr2	45176020	45177796	2	Yes	intergenic	NA	Yes	7	cg19772092,cg15044760,cg13704086,cg26855801,cg19756790,cg12162450,cg07138585	7	cg19772092,cg15044760,cg13704086,cg26855801,cg19756790,cg12162450,cg07138585
chr2	45178545	45180869	2	Yes	promoter	AC012354.6	No	12	cg00025680,cg24673771,cg14345917,cg18110359,cg03953660,cg14080155,cg26140394,cg04415008,cg03312366,cg12015854,cg02975463,cg18045195	14	cg00025680,cg01638436,cg20145831,cg17059926,cg24673771,cg22760466,cg18110359,cg03953660,cg14080155,cg26140394,cg04415008,cg03312366,cg12015854,cg18045195
chr2	45181321	45183607	2	Yes	promoter	AC012354.6	No	9	cg27111925,cg07358444,cg03158570,cg02540036,cg05868445,cg08871101,cg05792368,cg22103909,cg18855104	12	cg27111925,cg07358444,cg03158570,cg02540036,cg15776636,cg08871101,cg05792368,cg22103909,cg18855104,cg22861102,cg00029648,cg02674280
chr2	45227119	45229808	2	Yes	intergenic	NA	No	8	cg06110575,cg26853061,cg10068996,cg21608600,cg02019574,cg09568355,cg03230711,cg22912834	8	cg06110575,cg26853061,cg10068996,cg21608600,cg02019574,cg09568355,cg03230711,cg22912834
chr2	45230703	45232925	2	Yes	gene body	SIX2	No	9	cg02893453,cg07834682,cg00366850,cg12109291,cg05514256,cg04362586,cg06007282,cg21875802,cg13261971	8	cg02893453,cg00366850,cg12109291,cg05514256,cg04362586,cg06007282,cg21875802,cg13261971
chr2	45234966	45238482	2	Yes	promoter	SIX2	Yes	19	cg10281509,cg26391832,cg17272224,cg20318845,cg02711647,cg09526912,cg13052965,cg24347594,cg02004418,cg08751472,cg15554875,cg03310469,cg20881074,cg20926035,cg15019790,cg05136263,cg05847586,cg03646261,cg06819718	17	cg10281509,cg26391832,cg17272224,cg20318845,cg02711647,cg09526912,cg13052965,cg02004418,cg08751472,cg15554875,cg03310469,cg20881074,cg20926035,cg15019790,cg05136263,cg03646261,cg06819718
chr2	45239826	45242274	2	Yes	promoter	AC093702.1	No	7	cg13273128,cg23644005,cg10476112,cg22882665,cg25623768,cg18623980,cg14845812	10	cg13273128,cg23644005,cg10476112,cg22882665,cg25623768,cg27047032,cg24038651,cg24212971,cg18623980,cg14845812
chr2	45395145	45398867	2	Yes	promoter	AC009236.2	No	11	cg01572940,cg26779985,cg16619576,cg20201270,cg14223654,cg10588622,cg09862801,cg16705594,cg25206134,cg20459525,cg12503643	17	cg01572940,cg26779985,cg25716691,cg16619576,cg25606039,cg20201270,cg14223654,cg10588622,cg09862801,cg16705594,cg25206134,cg20459525,cg12503643,cg21000454,cg25292618,cg27434326,cg21455928
chr2	45870090	45871588	3	Yes	intergenic	NA	Yes	5	cg17281365,cg25292244,cg08715805,cg05208381,cg01002570	6	cg03126992,cg17281365,cg08715805,cg05208381,cg17472489,cg01002570
chr2	45876276	45880589	3	Yes	promoter	PRKCE	No	14	cg07835844,cg11476211,cg18204079,cg06824134,cg11662638,cg13547577,cg02544394,cg19538885,cg20081286,cg23861889,cg21701125,cg05890578,cg06041469,cg04702872	14	cg07835844,cg20825437,cg20709200,cg11476211,cg18204079,cg06824134,cg11662638,cg13547577,cg13719628,cg02544394,cg23861889,cg05890578,cg06041469,cg04702872
chr2	46523113	46527771	2	Yes	promoter	EPAS1	Yes	18	cg07901411,cg25124739,cg20623601,cg24046888,cg15291914,cg01313320,cg24460563,cg26627511,cg04518274,cg06388946,cg01780482,cg12784625,cg11501862,cg08871383,cg01960526,cg00330888,cg21276379,cg17518825	20	cg07901411,cg25124739,cg20623601,cg24046888,cg15291914,cg01313320,cg24460563,cg26627511,cg06388946,cg01780482,cg12784625,cg25225793,cg11501862,cg08871383,cg01960526,cg00330888,cg21276379,cg07623518,cg17518825,cg00555811
chr2	46726222	46728090	3	No	promoter	RP11-417F21.2	No	2	cg18583728,cg17724938	5	cg18583728,cg14357776,cg20802951,cg15998711,cg17228940
chr2	47794722	47799742	3	Yes	promoter	AC138655.1,KCNK12	Yes	14	cg10903274,cg14758072,cg04943225,cg04934807,cg04981611,cg27320127,cg13913015,cg01826863,cg08074851,cg04431946,cg03603951,cg02318629,cg13223402,cg27138584	16	cg14758072,cg04943225,cg04934807,cg04981611,cg27320127,cg16621816,cg13913015,cg01826863,cg08074851,cg06144198,cg22382953,cg04431946,cg02318629,cg13223402,cg27138584,cg17885628
chr2	48981840	48983481	3	Yes	promoter	LHCGR	No	8	cg18923472,cg02776315,cg12351433,cg19403014,cg20156659,cg13423075,cg00209038,cg15796978	11	cg07382691,cg18923472,cg02776315,cg12351433,cg19403014,cg20869158,cg26165176,cg20156659,cg13423075,cg00209038,cg15796978
chr2	50572473	50575777	3	Yes	promoter	NRXN1	No	14	cg04707706,cg02495518,cg07529754,cg13906811,cg17677030,cg18201351,cg10099415,cg03295083,cg17526573,cg05015185,cg22001533,cg14875171,cg03531247,cg04595505	15	cg04707706,cg02495518,cg07529754,cg13906811,cg18201351,cg10099415,cg03295083,cg17526573,cg05015185,cg15134685,cg22001533,cg05579077,cg14875171,cg03531247,cg04595505
chr2	54556519	54557959	1	Yes	promoter	C2orf73	No	6	cg25124366,cg11111057,cg08130668,cg11349715,cg19222712,cg04706327	9	cg25124366,cg11111057,cg08130668,cg11349715,cg19222712,cg04706327,cg11526274,cg26289571,cg12756081
chr2	54949340	54953060	1	Yes	promoter	EML6	No	15	cg10855081,cg13568348,cg04197823,cg16238795,cg14743593,cg02483058,cg00037388,cg18279994,cg15543754,cg18516317,cg05556613,cg00261430,cg23576807,cg14709837,cg01193335	16	cg10855081,cg13568348,cg04197823,cg16238795,cg14743593,cg13585331,cg02483058,cg22336080,cg00037388,cg18279994,cg15543754,cg18516317,cg00261430,cg23576807,cg14709837,cg01193335
chr2	56148797	56151781	1	Yes	promoter	EFEMP1	No	14	cg25968367,cg19702569,cg03817671,cg16118212,cg05168033,cg08130988,cg24719005,cg25046074,cg05385513,cg16100120,cg03122624,cg20786074,cg25711779,cg23260993	13	cg25968367,cg19702569,cg03817671,cg16118212,cg05168033,cg08130988,cg24719005,cg25046074,cg05385513,cg16100120,cg03122624,cg20786074,cg25711779
chr2	56410380	56413549	3	Yes	promoter	AC007743.1,CCDC85A	No	20	cg10664190,cg19516982,cg17501259,cg06716959,cg24130711,cg14552376,cg05991743,cg23739335,cg00879447,cg21968324,cg10805352,cg20338300,cg02084491,cg19486482,cg05070332,cg21848371,cg11572305,cg14975632,cg08096062,cg00636072	16	cg10664190,cg14977041,cg06716959,cg14552376,cg05991743,cg23739335,cg00879447,cg21968324,cg10805352,cg20338300,cg02084491,cg19486482,cg21848371,cg11572305,cg08096062,cg00636072
chr2	60795708	60798167	3	No	intergenic	NA	Yes	3	cg04802694,cg24525395,cg22122603	3	cg04802694,cg22122603,cg23538701
chr2	60808252	60809642	3	Yes	intergenic	NA	No	5	cg19306307,cg23685151,cg09672440,cg02750883,cg04091898	5	cg19306307,cg03552728,cg23685151,cg09672440,cg04091898
chr2	60962012	60963765	3	No	intergenic	NA	Yes	3	cg23519930,cg11723397,cg26888813	5	cg23519930,cg11723397,cg26888813,cg00386013,cg16704832
chr2	61109212	61111107	3	No	promoter	AC010733.4,REL	No	0	NA	0	NA
chr2	62683617	62685381	3	Yes	intergenic	NA	No	5	cg19856758,cg09927842,cg03694868,cg02792086,cg13688974	5	cg19856758,cg09927842,cg03694868,cg14887028,cg13688974
chr2	62797115	62798972	3	No	intergenic	NA	No	5	cg05655534,cg07185131,cg04036593,cg08573315,cg27227250	6	cg05655534,cg07185131,cg04036593,cg08573315,cg27227250,cg06094235
chr2	63271000	63287679	2	Yes	promoter	AC009501.4,OTX1	Yes	103	cg15367453,cg25741215,cg10927449,cg25168494,cg11536474,cg27315333,cg07617338,cg18947951,cg04371726,cg13768290,cg19351026,cg05092308,cg17145370,cg22303418,cg22666373,cg22249789,cg19763461,cg25371919,cg10122865,cg23229261,cg21472506,cg07938743,cg03299042,cg14604681,cg07974511,cg08473330,cg04654530,cg04808506,cg00463767,cg00445405,cg03655683,cg10859133,cg25622366,cg27364741,cg10640333,cg02606423,cg2…	100	cg15367453,cg25741215,cg10927449,cg25168494,cg11536474,cg27315333,cg07617338,cg18947951,cg04371726,cg13768290,cg19351026,cg05092308,cg17145370,cg22303418,cg22666373,cg22249789,cg19763461,cg25371919,cg10122865,cg23229261,cg21472506,cg07938743,cg14604681,cg07974511,cg08473330,cg04654530,cg04808506,cg00463767,cg00445405,cg03655683,cg10859133,cg25622366,cg27364741,cg10640333,cg02606423,cg22732253,cg0…
chr2	64835939	64837499	3	Yes	gene body	AC007365.1	Yes	4	cg15928347,cg27470373,cg09950256,cg02270689	3	cg15928347,cg09950256,cg02270689
chr2	64878548	64880215	3	No	promoter	SERTAD2	Yes	1	cg18462521	2	cg18462521,cg02896177
chr2	64993851	64996258	3	Yes	intergenic	NA	Yes	4	cg06836181,cg14957430,cg16425554,cg01165043	3	cg16932880,cg06836181,cg01165043
chr2	65085638	65087909	3	Yes	gene body	AC007880.1	Yes	4	cg09296270,cg25611756,cg14599998,cg00810971	5	cg11383720,cg09296270,cg14599998,cg09321367,cg00810971
chr2	65214767	65218321	2	Yes	promoter	SLC1A4	Yes	18	cg20698421,cg00498211,cg19220282,cg26748578,cg07715387,cg14582929,cg17107459,cg14233568,cg18078305,cg00877964,cg21317132,cg11866527,cg24913324,cg23581656,cg21437521,cg15617847,cg27362103,cg12682392	19	cg20698421,cg00498211,cg19220282,cg26748578,cg07715387,cg23165464,cg01959079,cg12474044,cg17107459,cg14233568,cg00877964,cg11866527,cg24913324,cg23581656,cg21437521,cg15617847,cg27362103,cg12682392,cg05732767
chr2	65656590	65659476	3	Yes	promoter	SPRED2	Yes	5	cg04844016,cg11877270,cg16203330,cg03932406,cg10256249	5	cg27159677,cg04844016,cg11877270,cg16203330,cg03932406
chr2	65661359	65663163	3	Yes	promoter	AC074391.1	No	1	cg00606496	1	cg00606496
chr2	65663387	65665253	3	Yes	promoter	AC074391.1	No	5	cg09086380,cg03813437,cg11062635,cg02756655,cg10067019	6	cg09086380,cg03813437,cg11062635,cg27017744,cg02756655,cg10067019
chr2	66651673	66655079	2	Yes	gene body	MEIS1-AS3	Yes	8	cg11807280,cg17775091,cg10806009,cg19656974,cg10089527,cg00015058,cg02968116,cg00740914	8	cg11807280,cg10806009,cg19656974,cg10089527,cg00015058,cg02968116,cg11986082,cg00740914
chr2	66658530	66669480	2	Yes	promoter	MEIS1,MEIS1-AS1,MEIS1-AS2,MEIS1-AS3	No	40	cg26537478,cg05877497,cg04288999,cg17107572,cg11433622,cg17945976,cg16178603,cg17454831,cg15978039,cg22731271,cg23972738,cg23497016,cg09462924,cg03589296,cg00995986,cg23398076,cg06796713,cg05496203,cg16927242,cg07809589,cg01406988,cg25721451,cg12975220,cg02209932,cg05098471,cg26691604,cg02609473,cg20691283,cg05930133,cg10633966,cg06651878,cg05180985,cg26482052,cg19572637,cg08225529,cg21467252,cg2…	50	cg06880482,cg26537478,cg05877497,cg04288999,cg17107572,cg11433622,cg24511951,cg11313446,cg17945976,cg16178603,cg17454831,cg15978039,cg23972738,cg23497016,cg09462924,cg02029212,cg03589296,cg16758314,cg00995986,cg22982573,cg23398076,cg06796713,cg21306540,cg05496203,cg16927242,cg07809589,cg18329218,cg20774834,cg12132133,cg07915559,cg05091060,cg22490405,cg01406988,cg12975220,cg02209932,cg11697107,cg0…
chr2	66670709	66674650	2	Yes	gene body	MEIS1	Yes	11	cg08238215,cg04751149,cg02551743,cg06833110,cg14775296,cg10464312,cg06994420,cg09550083,cg12082609,cg09535924,cg01271812	15	cg08238215,cg21715346,cg04751149,cg02551743,cg06833110,cg14775296,cg10464312,cg06994420,cg09550083,cg02492115,cg15468045,cg12407996,cg12082609,cg09535924,cg01271812
chr2	66800968	66806322	2	Yes	promoter	AC007392.3	Yes	19	cg13851508,cg11653134,cg16298760,cg21568106,cg15135762,cg03350828,cg22112267,cg10736654,cg06820388,cg20203352,cg09902029,cg13895765,cg04595562,cg02764245,cg12886942,cg05580181,cg05060880,cg17127214,cg02335251	20	cg13851508,cg11653134,cg16298760,cg21568106,cg03350828,cg22112267,cg10736654,cg06820388,cg20203352,cg09902029,cg11207685,cg13895765,cg04595562,cg02764245,cg12886942,cg05580181,cg05060880,cg17127214,cg02335251,cg03396922
chr2	66807591	66811135	2	Yes	gene body	AC007392.3	No	14	cg02676167,cg01721569,cg01020413,cg11241663,cg24105287,cg08217163,cg10552446,cg02963248,cg03478122,cg22827063,cg08977536,cg24569492,cg16865953,cg18675617	12	cg02676167,cg01020413,cg24105287,cg08217163,cg10552446,cg02963248,cg03478122,cg22827063,cg24569492,cg16865953,cg04311343,cg18675617
chr2	68545007	68547882	3	Yes	promoter	CNRIP1	Yes	15	cg21216118,cg10021043,cg05894910,cg10908369,cg08157672,cg07594636,cg15313459,cg00020052,cg04020079,cg24171907,cg07080358,cg11573679,cg06275642,cg22400703,cg21581504	20	cg21216118,cg24671807,cg07843760,cg10021043,cg05894910,cg10908369,cg26612567,cg17640530,cg08157672,cg07594636,cg15313459,cg00020052,cg04020079,cg09870066,cg24171907,cg07080358,cg11573679,cg22400703,cg21581504,cg26671623
chr2	68869548	68871997	1	Yes	promoter	PROKR1	No	8	cg00887755,cg00962459,cg17802633,cg15901259,cg01759126,cg13451280,cg19452535,cg13839964	12	cg11487289,cg00887755,cg00962459,cg17802633,cg15901259,cg01759126,cg13451280,cg03183721,cg13306752,cg21052291,cg19452535,cg13839964
chr2	69532814	69535154	3	Yes	intergenic	NA	Yes	7	cg13393601,cg15751090,cg05165689,cg02782622,cg06837311,cg21973449,cg18427336	7	cg13393601,cg15751090,cg05165689,cg06837311,cg21973449,cg18427336,cg17643115
chr2	69967854	69970432	1	Yes	promoter	ANXA4	No	18	cg12518775,cg11942603,cg05720666,cg19269713,cg21960922,cg11056435,cg05136786,cg08353937,cg20382057,cg00900124,cg10534439,cg08311172,cg03636174,cg26034355,cg09547034,cg17372745,cg19353425,cg13355704	16	cg12518775,cg11942603,cg05720666,cg19269713,cg21960922,cg11056435,cg05136786,cg08353937,cg00900124,cg10534439,cg08311172,cg03636174,cg09547034,cg17372745,cg19353425,cg13355704
chr2	70779045	70782409	1	Yes	promoter	TGFA	No	16	cg20097593,cg22425806,cg11415914,cg18522284,cg00476037,cg22330165,cg23104227,cg02277487,cg14784608,cg04670005,cg05943476,cg04361032,cg14873739,cg07004820,cg25475289,cg26180126	20	cg17533035,cg03512765,cg23245313,cg20097593,cg22425806,cg11415914,cg18522284,cg00476037,cg22330165,cg23104227,cg02277487,cg14784608,cg04670005,cg05943476,cg04361032,cg14873739,cg07004820,cg25475289,cg26180126,cg16839690
chr2	71016365	71018421	2	Yes	promoter	FIGLA	No	11	cg07532089,cg02881096,cg27641317,cg26095658,cg08834401,cg16907558,cg00469856,cg22650617,cg22687748,cg04297868,cg01812070	13	cg07532089,cg02881096,cg27641317,cg06294698,cg25222010,cg26095658,cg16601633,cg08834401,cg00469856,cg22650617,cg22687748,cg04297868,cg01812070
chr2	71113713	71117176	2	Yes	promoter	AC007040.5	No	14	cg26307926,cg18867200,cg07852231,cg18144593,cg22876812,cg08793877,cg03001942,cg07540421,cg10954469,cg09423703,cg15423212,cg11827837,cg06142537,cg03502656	14	cg26307926,cg18867200,cg18144593,cg22876812,cg08793877,cg03001942,cg10954469,cg09423703,cg15423212,cg16725316,cg11827837,cg21381646,cg06142537,cg03502656
chr2	71125474	71129721	2	Yes	promoter	VAX2	Yes	35	cg05021771,cg06086887,cg21294935,cg01620617,cg01719210,cg21637670,cg15579817,cg00731411,cg17082803,cg09907720,cg03595100,cg20518889,cg02558364,cg20267441,cg08245702,cg07300178,cg23885415,cg20699736,cg05164666,cg13361843,cg22827124,cg13265869,cg12374431,cg15846787,cg04608900,cg26334672,cg25032342,cg25413843,cg23644992,cg07094440,cg14606431,cg19015611,cg23271234,cg02751808,cg09543478	27	cg05021771,cg21294935,cg01620617,cg01719210,cg21637670,cg00731411,cg03595100,cg20518889,cg02558364,cg20267441,cg08245702,cg07300178,cg23885415,cg20699736,cg05164666,cg22827124,cg15846787,cg26334672,cg25032342,cg25413843,cg23644992,cg07094440,cg14606431,cg19015611,cg23271234,cg02751808,cg09543478
chr2	71165470	71167082	3	No	gene body	AC007040.11,ATP6V1B1	No	0	NA	1	cg26740297
chr2	71191530	71192901	3	Yes	promoter	RN7SL160P	No	4	cg04751811,cg10598816,cg22697962,cg06288697	2	cg10598816,cg22697962
chr2	71204243	71207080	3	Yes	promoter	ANKRD53	No	15	cg12428298,cg00421335,cg15165122,cg18006568,cg23060872,cg05492660,cg20814026,cg05472974,cg07903989,cg01154254,cg04737087,cg19244342,cg19111030,cg06783668,cg27665449	17	cg00421335,cg15165122,cg18303261,cg18006568,cg23060872,cg05492660,cg20814026,cg05472974,cg07903989,cg14464393,cg16612112,cg01154254,cg04737087,cg19244342,cg19111030,cg06783668,cg27665449
chr2	71502937	71507096	3	Yes	promoter	ZNF638	No	14	cg22102332,cg24077001,cg09075925,cg04737950,cg07358267,cg17332897,cg23045594,cg13686615,cg01579289,cg01717446,cg09012544,cg16368750,cg07393255,cg04659154	15	cg22102332,cg01828275,cg24077001,cg07358267,cg17332897,cg23045594,cg14739885,cg13686615,cg01579289,cg01717446,cg09012544,cg16368750,cg07393255,cg21106729,cg04659154
chr2	71679864	71682948	3	Yes	promoter	DYSF	Yes	9	cg17415947,cg14958017,cg00672622,cg03135061,cg00013475,cg10944735,cg08972867,cg07161827,cg15294851	8	cg17415947,cg14958017,cg00672622,cg00013475,cg16965027,cg10944735,cg08972867,cg07161827
chr2	71692283	71694866	2	Yes	promoter	DYSF	No	13	cg17974684,cg03170698,cg11027058,cg03674127,cg15155463,cg09318508,cg18610958,cg18067847,cg23820770,cg16626884,cg26540905,cg17880014,cg09064252	15	cg17974684,cg03170698,cg11027058,cg03674127,cg15155463,cg09318508,cg18610958,cg18067847,cg23820770,cg16626884,cg26540905,cg17880014,cg01958405,cg09064252,cg20832302
chr2	72369598	72378187	2	Yes	promoter	CYP26B1	Yes	29	cg23585978,cg20786246,cg20205284,cg14947263,cg07163401,cg25297992,cg22510582,cg18244289,cg15392489,cg08641090,cg11034245,cg20097440,cg04884908,cg13948082,cg14932468,cg08286738,cg08863459,cg10883901,cg05227078,cg03717555,cg09984469,cg06049781,cg17498867,cg22540115,cg22979783,cg22856324,cg12044685,cg14447606,cg00999152	30	cg23585978,cg20786246,cg20205284,cg14947263,cg07163401,cg25297992,cg18244289,cg15392489,cg25662807,cg16364095,cg02849536,cg08641090,cg13637213,cg17318467,cg20097440,cg04884908,cg13948082,cg14932468,cg08286738,cg10883901,cg25905184,cg05227078,cg03717555,cg09984469,cg06049781,cg22540115,cg22979783,cg22856324,cg14447606,cg00999152
chr2	73089010	73090801	3	Yes	intergenic	NA	No	6	cg03173962,cg26110645,cg02558543,cg14507002,cg14318093,cg06142341	5	cg03173962,cg26110645,cg14507002,cg14318093,cg06142341
chr2	73113586	73115700	3	Yes	promoter	SPR	No	14	cg04665639,cg15253672,cg25655069,cg03327733,cg23998381,cg13525064,cg09305687,cg05964953,cg00930762,cg04807855,cg12436443,cg19511045,cg09169255,cg19889780	15	cg04665639,cg15253672,cg25655069,cg23998381,cg13525064,cg09305687,cg05964953,cg00930762,cg04807855,cg12436443,cg19511045,cg09169255,cg19889780,cg06728310,cg24696314
chr2	73141337	73148753	2	Yes	promoter	EMX1	Yes	24	cg07279070,cg00866399,cg16928066,cg06498720,cg02744113,cg01833212,cg18775012,cg08013270,cg21351994,cg14940308,cg16314401,cg25498838,cg17090593,cg15921587,cg05707704,cg26704870,cg26898166,cg23851476,cg18704110,cg23061718,cg14848284,cg12325349,cg13972054,cg22653139	26	cg07279070,cg00866399,cg16928066,cg06498720,cg02744113,cg01833212,cg18775012,cg08013270,cg21351994,cg14940308,cg21433086,cg16314401,cg17090593,cg05707704,cg26704870,cg26898166,cg23851476,cg18704110,cg23061718,cg14848284,cg03385441,cg12325349,cg16150451,cg13972054,cg22653139,cg14224273
chr2	73150616	73153222	2	Yes	gene body	EMX1	No	8	cg22539450,cg08800878,cg01695225,cg15270150,cg00486564,cg16781647,cg10136354,cg04965934	10	cg22539450,cg01695225,cg15270150,cg00486564,cg16781647,cg10136354,cg04965934,cg23431560,cg22660026,cg09861295
chr2	73401670	73405501	2	Yes	intergenic	NA	Yes	12	cg08357125,cg21475816,cg10522577,cg03591798,cg10046115,cg06267200,cg20347496,cg09493249,cg20090558,cg20246863,cg24220031,cg19384717	11	cg08357125,cg21475816,cg10522577,cg03591798,cg26965637,cg10046115,cg06267200,cg20347496,cg20090558,cg24220031,cg19384717
chr2	73428449	73431069	2	Yes	promoter	NOTO	No	13	cg21202452,cg08430329,cg14998651,cg02344895,cg23237183,cg14775207,cg12529672,cg16877924,cg02884775,cg16236766,cg05053562,cg19741359,cg17383987	11	cg21202452,cg08430329,cg14998651,cg02344895,cg23237183,cg14775207,cg16877924,cg02884775,cg16236766,cg05053562,cg06806480
chr2	73494973	73497552	1	Yes	promoter	FBXO41	No	5	cg02063488,cg21918313,cg06579626,cg01383287,cg01610164	7	cg23579199,cg02063488,cg06299447,cg21918313,cg06579626,cg01383287,cg01610164
chr2	73517949	73521621	2	Yes	promoter	EGR4	No	12	cg21111868,cg01059743,cg22587602,cg04111314,cg05666120,cg13481359,cg06079106,cg26647617,cg15769184,cg26049726,cg25622481,cg10014308	12	cg25362708,cg21111868,cg04558100,cg01059743,cg22587602,cg05666120,cg13481359,cg06079106,cg26647617,cg15769184,cg25622481,cg10014308
chr2	74207485	74209577	1	No	promoter	DGUOK-AS1	No	3	cg01207951,cg26641076,cg07926733	7	cg10449725,cg07364023,cg08095443,cg10484740,cg01207951,cg26641076,cg07926733
chr2	74210207	74212098	1	Yes	promoter	AC073046.25	No	6	cg06160295,cg11878675,cg21603615,cg05981785,cg19445690,cg02251243	7	cg06160295,cg11878675,cg04523212,cg21603615,cg05981785,cg19445690,cg02251243
chr2	74724467	74731862	2	Yes	promoter	AC005041.17,LBX2,LBX2-AS1,RP11-523H20.3	No	34	cg13407169,cg25251459,cg02100410,cg08984836,cg05490924,cg05745223,cg08193322,cg22237735,cg25503044,cg13921570,cg02845591,cg09011732,cg07515251,cg00573355,cg08490768,cg01295339,cg03270710,cg10738368,cg06768010,cg08355260,cg17105139,cg11985480,cg08973382,cg03035746,cg04255230,cg01484487,cg06226156,cg16153547,cg05823218,cg03742286,cg17745211,cg21429745,cg14514032,cg03522132	45	cg13407169,cg15533961,cg25251459,cg02100410,cg08984836,cg05490924,cg05745223,cg08193322,cg22237735,cg25503044,cg13921570,cg02845591,cg09011732,cg07515251,cg00573355,cg13216999,cg25883327,cg08490768,cg01295339,cg03270710,cg10738368,cg06768010,cg10855681,cg08355260,cg17105139,cg11985480,cg08973382,cg25426273,cg03035746,cg04255230,cg15689410,cg01484487,cg25040225,cg05702092,cg04679040,cg17192454,cg1…
chr2	74739752	74744070	2	Yes	promoter	TLX2	No	20	cg14877896,cg03998104,cg21185289,cg16852704,cg07203423,cg19656282,cg07524679,cg05856387,cg07990546,cg18835416,cg05349062,cg00522893,cg10275973,cg08267002,cg18409528,cg03813688,cg25361106,cg23791682,cg00234616,cg22656420	20	cg14877896,cg03998104,cg21185289,cg16852704,cg07203423,cg19656282,cg07524679,cg18835416,cg05349062,cg00522893,cg10275973,cg08267002,cg17284580,cg11580845,cg18409528,cg03813688,cg25361106,cg00234616,cg10365849,cg22656420
chr2	74774999	74777710	1	Yes	promoter	DOK1	No	5	cg20914725,cg01906555,cg12161067,cg05736393,cg04500896	21	cg14501431,cg11812752,cg21465032,cg06584891,cg01646897,cg20914725,cg00644497,cg08304864,cg04985290,cg03663721,cg01906555,cg12161067,cg12655338,cg11806445,cg11150382,cg21109929,cg05736393,cg04500896,cg05577344,cg09116068,cg20412005
chr2	74779608	74781246	3	No	promoter	DOK1,LOXL3	No	6	cg08940570,cg11067786,cg23674882,cg00831247,cg19148731,cg15989091	9	cg08940570,cg11067786,cg23674882,cg00831247,cg19148731,cg15989091,cg25792271,cg13004765,cg25142466
chr2	74781615	74783593	1	Yes	promoter	DOK1,LOXL3	No	6	cg11800635,cg22989958,cg20706438,cg02048416,cg26117023,cg12962355	9	cg11800635,cg22989958,cg20706438,cg02048416,cg17891101,cg20288165,cg26117023,cg12962355,cg25063221
chr2	74881245	74882578	3	Yes	promoter	SEMA4F	No	6	cg09916336,cg06118588,cg03717315,cg19582212,cg08203850,cg16028986	6	cg09916336,cg06118588,cg03717315,cg08203850,cg10143886,cg16028986
chr2	74941884	74943493	3	Yes	intergenic	NA	No	6	cg16437385,cg04089111,cg09926949,cg25253773,cg06037631,cg04639610	7	cg16437385,cg04089111,cg09926949,cg25253773,cg03809624,cg06037631,cg04639610
chr2	75424462	75429039	2	Yes	promoter	TACR1	Yes	21	cg10576257,cg18432099,cg21314480,cg03464378,cg04582974,cg20689228,cg25000012,cg09306214,cg05403555,cg09987562,cg23210365,cg10814856,cg14650577,cg03286235,cg22277431,cg02111587,cg15584401,cg11348389,cg20213613,cg26033710,cg18668821	21	cg10576257,cg18432099,cg21314480,cg03464378,cg04582974,cg20689228,cg25000012,cg05403555,cg09987562,cg09063388,cg23210365,cg10814856,cg14650577,cg03286235,cg22277431,cg02111587,cg15584401,cg11348389,cg20213613,cg26033710,cg18668821
chr2	75786651	75789336	3	Yes	promoter	EVA1A	No	15	cg16331051,cg00156336,cg16751938,cg06772824,cg10135640,cg09551776,cg03817939,cg19850959,cg06696800,cg11509341,cg07724816,cg05292150,cg11453343,cg18734842,cg16720807	19	cg22510460,cg08609249,cg16331051,cg21881336,cg00156336,cg16751938,cg06772824,cg10135640,cg09551776,cg03817939,cg19850959,cg12838436,cg06696800,cg11509341,cg07724816,cg05292150,cg11453343,cg18734842,cg16720807
chr2	79219285	79221575	3	Yes	intergenic	NA	No	7	cg24434987,cg14005019,cg24902278,cg05577810,cg10156366,cg25479788,cg22686854	6	cg24434987,cg24902278,cg05577810,cg10156366,cg25479788,cg22686854
chr2	80526143	80532520	2	Yes	promoter	LRRTM1	Yes	21	cg00465284,cg21621248,cg26355577,cg02856109,cg09482777,cg27629977,cg11231249,cg00549910,cg12078605,cg20792735,cg08154280,cg00091964,cg17349389,cg23665824,cg24632241,cg20072442,cg00997079,cg13572145,cg07640800,cg00058515,cg13753435	28	cg19925939,cg01955779,cg21248007,cg15478597,cg01536445,cg00465284,cg12945120,cg21621248,cg16882804,cg26355577,cg02856109,cg27629977,cg11231249,cg00549910,cg12078605,cg08154280,cg00091964,cg17349389,cg23665824,cg27619414,cg24632241,cg20072442,cg00997079,cg13572145,cg17927488,cg07640800,cg00058515,cg13753435
chr2	80549033	80550800	3	Yes	gene body	CTNNA2	No	5	cg10579530,cg01146063,cg06607919,cg24509810,cg25636665	5	cg10579530,cg01146063,cg06607919,cg24509810,cg25636665
chr2	85106344	85109890	1	Yes	promoter	TRABD2A	No	19	cg19401472,cg00239394,cg00361467,cg01798251,cg16448620,cg03479657,cg08172009,cg05057843,cg10990312,cg12197656,cg27134732,cg16063519,cg20653012,cg03604892,cg18283779,cg07475885,cg01505870,cg08251815,cg14254080	18	cg19401472,cg00239394,cg00361467,cg01798251,cg16448620,cg15986785,cg03479657,cg08172009,cg10990312,cg12197656,cg27134732,cg16063519,cg20653012,cg18283779,cg07475885,cg01505870,cg08251815,cg14254080
chr2	85810815	85812630	3	Yes	promoter	VAMP5	No	7	cg25651505,cg16865965,cg11108890,cg19513321,cg16719560,cg02652597,cg23902361	9	cg25651505,cg16865965,cg11108890,cg19513321,cg16719560,cg25362339,cg02652597,cg23921113,cg23902361
chr2	85979674	85983321	2	Yes	promoter	ATOH8	Yes	16	cg14558812,cg06897686,cg00400334,cg02317742,cg13065834,cg19956166,cg09662694,cg01751470,cg23571433,cg03128635,cg12930553,cg18815025,cg01472882,cg24399924,cg21068480,cg01461067	19	cg14558812,cg06897686,cg00400334,cg15671782,cg07381326,cg02317742,cg15649452,cg13065834,cg19956166,cg09662694,cg01751470,cg03128635,cg12930553,cg18815025,cg24399924,cg21068480,cg17225651,cg02696047,cg01461067
chr2	85991878	85993669	3	No	gene body	ATOH8	Yes	2	cg14141912,cg07622521	2	cg14141912,cg07622521
chr2	86114170	86117440	3	Yes	promoter	AC105053.4,ST3GAL5	No	13	cg11361262,cg01947862,cg16963622,cg00783159,cg10337027,cg01040759,cg17702024,cg04981508,cg12214471,cg12225893,cg01320614,cg18763191,cg07214715	14	cg01947862,cg16963622,cg00783159,cg01040759,cg17702024,cg04981508,cg15666459,cg12214471,cg12225893,cg01320614,cg18763191,cg07214715,cg21135002,cg25678125
chr2	86562969	86565798	3	Yes	promoter	REEP1	Yes	16	cg11517309,cg17872866,cg26116560,cg24364398,cg11915205,cg02870945,cg01968178,cg22717109,cg24591029,cg00494761,cg13497301,cg21569844,cg20176285,cg12367520,cg05560302,cg18946805	20	cg27179172,cg11517309,cg17872866,cg25385065,cg24364398,cg11915205,cg02870945,cg01968178,cg22717109,cg24591029,cg00494761,cg11722766,cg13497301,cg21569844,cg20176285,cg16126227,cg12367520,cg05560302,cg18946805,cg16934445
chr2	87015694	87019156	2	Yes	promoter	CD8A	No	16	cg18830527,cg08506127,cg09318840,cg27502457,cg02170525,cg05163496,cg27247697,cg17108819,cg13946520,cg09046939,cg00916536,cg12653796,cg07152196,cg26057751,cg13803976,cg24345747	17	cg18830527,cg08506127,cg09318840,cg25355010,cg27502457,cg02170525,cg21578555,cg27247697,cg17108819,cg13946520,cg09046939,cg00916536,cg12653796,cg07152196,cg26057751,cg13803976,cg24345747
chr2	87034065	87036281	3	Yes	promoter	CD8A	No	14	cg13847640,cg07868273,cg20594226,cg05237932,cg09058748,cg07090138,cg17386466,cg11072498,cg06616488,cg16883282,cg00670742,cg22728534,cg21116934,cg03318654	11	cg13847640,cg07868273,cg05237932,cg09058748,cg07090138,cg17386466,cg11072498,cg00670742,cg22728534,cg21116934,cg03318654
chr2	87088108	87089975	3	Yes	promoter	AC111200.1,CD8B	No	6	cg27445883,cg14901920,cg05403433,cg15746583,cg25460166,cg26850754	9	cg27445883,cg12104496,cg14901920,cg25042892,cg22914125,cg05403433,cg03960936,cg15746583,cg26850754
chr2	88749006	88751839	3	Yes	promoter	FOXI3	No	6	cg24746100,cg23044079,cg27111463,cg09415272,cg20634498,cg01600661	6	cg24746100,cg23044079,cg27111463,cg09415272,cg20634498,cg01600661
chr2	89064101	89065929	3	Yes	promoter	AC096579.1,ANKRD36BP2	No	11	cg09410752,cg12294208,cg01506298,cg02646394,cg23042796,cg17108748,cg20584997,cg21296675,cg13422093,cg07929264,cg26053291	10	cg12294208,cg01506298,cg02646394,cg23042796,cg17108748,cg20584997,cg21296675,cg13422093,cg07929264,cg26053291
chr2	91775557	91779985	2	Yes	intergenic	NA	No	7	cg15358235,cg14362697,cg22509113,cg06550232,cg08501265,cg24536249,cg04181327	8	cg15358235,cg14362697,cg03482074,cg22509113,cg06550232,cg08501265,cg24536249,cg04181327
chr2	95690434	95693856	3	Yes	promoter	AC103563.8,MAL	No	13	cg14410476,cg03129884,cg19762657,cg22762844,cg09712683,cg17626405,cg06668300,cg07224914,cg22403344,cg04804539,cg09983051,cg21245652,cg05142617	17	cg02465027,cg14410476,cg03129884,cg13501967,cg19762657,cg15879463,cg22762844,cg09712683,cg17626405,cg06668300,cg07224914,cg22403344,cg04804539,cg16956943,cg09983051,cg21245652,cg05142617
chr2	95823598	95825435	3	Yes	promoter	ZNF514	No	8	cg16119667,cg00459795,cg20272280,cg08470759,cg08623010,cg25103172,cg23721140,cg02292364	10	cg16119667,cg00459795,cg20272280,cg08470759,cg08623010,cg04051690,cg25103172,cg23721140,cg11105575,cg02292364
chr2	96010713	96013450	3	Yes	promoter	KCNIP3	No	10	cg07337544,cg25073919,cg03302008,cg23497501,cg12457040,cg04333213,cg26529376,cg03065383,cg09686236,cg03387066	11	cg07337544,cg25073919,cg03302008,cg23497501,cg12457040,cg04333213,cg26529376,cg03065383,cg09686236,cg22301377,cg03387066
chr2	96781238	96783736	3	Yes	promoter	ADRA2B	Yes	5	cg27606288,cg00594716,cg06970461,cg21542793,cg20634573	13	cg26564369,cg21974102,cg12211827,cg27606288,cg04280485,cg00594716,cg10816249,cg02867574,cg21385616,cg01036697,cg06970461,cg21542793,cg20634573
chr2	96809580	96811924	1	Yes	promoter	AC012307.2,DUSP2	Yes	8	cg23612030,cg01148741,cg24297695,cg05732530,cg04882937,cg06727510,cg04053045,cg02431562	8	cg25546991,cg23612030,cg24297695,cg05732530,cg04882937,cg06727510,cg04053045,cg02431562
chr2	96986212	96988379	3	Yes	promoter	AC021188.4	No	6	cg00873186,cg06277347,cg15863547,cg14207954,cg01310600,cg11963409	8	cg00873186,cg06277347,cg15863547,cg08828389,cg21901807,cg14021728,cg14207954,cg16088462
chr2	96990247	96992366	3	Yes	promoter	ITPRIPL1	No	12	cg24351076,cg15146125,cg06341177,cg08983217,cg11270393,cg13997864,cg05497345,cg17932631,cg18720905,cg06909469,cg24161793,cg02802590	15	cg24351076,cg06739059,cg05722266,cg15146125,cg06341177,cg08983217,cg18140058,cg11270393,cg05497345,cg17932631,cg18720905,cg06909469,cg24161793,cg02802590,cg24158111
chr2	97192528	97194222	3	Yes	gene body	RP11-363D14.1	No	8	cg10278162,cg14515424,cg22352818,cg17839721,cg09611490,cg04131799,cg01722304,cg01075095	7	cg10278162,cg14515424,cg22352818,cg17839721,cg09611490,cg04131799,cg01075095
chr2	97202432	97206066	3	Yes	promoter	ARID5A	Yes	7	cg04722215,cg13112407,cg19954537,cg14174055,cg01950434,cg21477691,cg17590938	9	cg04722215,cg13112407,cg19954537,cg14174055,cg16825635,cg11835668,cg02425365,cg21477691,cg17590938
chr2	97426727	97428705	3	Yes	promoter	CNNM4	Yes	8	cg11464842,cg12942038,cg19953799,cg14228484,cg23689052,cg00099835,cg11158729,cg21238414	8	cg11464842,cg12942038,cg19953799,cg14228484,cg23689052,cg00099835,cg11158729,cg21238414
chr2	97535596	97537290	3	Yes	promoter	SEMA4C	No	8	cg00528640,cg12896751,cg23089298,cg20248656,cg12849291,cg26373379,cg17609600,cg18762104	8	cg06835182,cg00528640,cg12896751,cg23089298,cg20248656,cg12849291,cg26373379,cg17609600
chr2	98702669	98704433	3	Yes	promoter	VWA3B	No	10	cg08026735,cg15149655,cg19763809,cg12477533,cg05044134,cg17515747,cg25656237,cg08584627,cg16002963,cg24275730	14	cg25961199,cg08026735,cg15149655,cg23394610,cg09330898,cg06212823,cg00743325,cg19763809,cg12477533,cg05044134,cg17515747,cg08584627,cg16002963,cg24275730
chr2	98962271	98965087	2	Yes	promoter	AC092675.4,CNGA3	No	14	cg16404530,cg21488538,cg19370054,cg25045746,cg20581321,cg02076785,cg20727142,cg10583000,cg24778248,cg19671120,cg18404308,cg11959694,cg00209520,cg22408503	11	cg21488538,cg19370054,cg02076785,cg13933835,cg03015784,cg10583000,cg19671120,cg18404308,cg11959694,cg00209520,cg22408503
chr2	99346140	99347479	3	Yes	promoter	MGAT4A	No	4	cg15989294,cg03069638,cg14440787,cg01161914	3	cg15989294,cg03069638,cg14440787
chr2	99347627	99348942	3	Yes	promoter	MGAT4A	No	5	cg01841118,cg01917375,cg12807014,cg27611857,cg17709503	3	cg01841118,cg12807014,cg27611857
chr2	99438772	99440371	3	Yes	gene body	KIAA1211L	No	5	cg08517455,cg11636504,cg20666917,cg19043574,cg18667659	5	cg08517455,cg11636504,cg20666917,cg19043574,cg18667659
chr2	99551470	99554173	3	Yes	promoter	KIAA1211L	Yes	12	cg03171465,cg09236434,cg04787024,cg17968795,cg15540144,cg27533019,cg14122696,cg16721459,cg20852890,cg10557743,cg00810351,cg06335008	13	cg03171465,cg09236434,cg04787024,cg17968795,cg15540144,cg27533019,cg14122696,cg16721459,cg20852890,cg17468254,cg10557743,cg00810351,cg06335008
chr2	100720837	100723618	2	No	promoter	AC092667.2,AFF3	No	10	cg03393607,cg12042952,cg11428546,cg04101806,cg11577355,cg09521647,cg19071879,cg04109781,cg23118464,cg14267725	14	cg17053318,cg03393607,cg12042952,cg11428546,cg17237287,cg04101806,cg11577355,cg21743236,cg09521647,cg04511128,cg19071879,cg04109781,cg23118464,cg14267725
chr2	100936986	100939571	2	Yes	promoter	LONRF2	Yes	12	cg21926883,cg08017756,cg07304692,cg14675211,cg14997226,cg23977631,cg14348439,cg03559235,cg00144550,cg05692746,cg08297393,cg26150922	14	cg21926883,cg08017756,cg07304692,cg14675211,cg14997226,cg23977631,cg14348439,cg03559235,cg00144550,cg05237131,cg05692746,cg08297393,cg18737356,cg26150922
chr2	101434506	101438385	2	Yes	promoter	AC092168.2,NPAS2	Yes	14	cg02365780,cg18428265,cg03909509,cg24221947,cg14383135,cg05861971,cg10165847,cg10529075,cg07799947,cg16157435,cg25153196,cg00581731,cg00584683,cg02049833	20	cg02365780,cg18428265,cg17440907,cg24438335,cg23335520,cg03909509,cg24221947,cg14383135,cg02928784,cg05861971,cg10165847,cg26562717,cg10529075,cg07799947,cg27273029,cg16157435,cg25153196,cg00581731,cg00584683,cg02049833
chr2	101765224	101767541	3	Yes	promoter	RP11-299H21.1,TBC1D8	No	3	cg06475673,cg00534380,cg02050985	3	cg06475673,cg00534380,cg02050985
chr2	102002599	102004717	3	Yes	promoter	CREG2	No	9	cg09498007,cg24057374,cg13363138,cg16574285,cg26708940,cg04865265,cg26572548,cg21388029,cg20264106	15	cg08374625,cg09498007,cg24057374,cg16855547,cg13363138,cg07978600,cg16574285,cg11617058,cg26708940,cg04865265,cg27225457,cg01418873,cg26572548,cg21388029,cg20264106
chr2	102089825	102091944	3	Yes	promoter	RFX8	No	15	cg27255239,cg02933362,cg05729200,cg02561771,cg26011364,cg12291728,cg04415270,cg01388757,cg12464048,cg12023693,cg16435561,cg03988527,cg19987611,cg02878891,cg13274107	17	cg27510024,cg10462143,cg27255239,cg02933362,cg05729200,cg02561771,cg26011364,cg12291728,cg04415270,cg01388757,cg12464048,cg12023693,cg16435561,cg05373455,cg19987611,cg02878891,cg13274107
chr2	102758082	102760268	3	Yes	promoter	IL1R1	No	5	cg27598107,cg06880612,cg19754707,cg09363443,cg05886087	8	cg27598107,cg06880612,cg21099811,cg19754707,cg09363443,cg18881380,cg18622950,cg05886087
chr2	102971726	102973259	3	Yes	promoter	IL18R1	No	6	cg23450938,cg13797825,cg09003973,cg13167562,cg14213517,cg01241218	9	cg23450938,cg13797825,cg11333242,cg14092017,cg09003973,cg26364291,cg13167562,cg14213517,cg01241218
chr2	103234573	103237365	3	Yes	promoter	SLC9A2	No	12	cg15992711,cg20050113,cg11915641,cg26159723,cg24751648,cg00292986,cg01050423,cg13465838,cg13411038,cg04532229,cg05021854,cg04297105	11	cg15992711,cg20050113,cg11915641,cg24751648,cg00292986,cg22562376,cg01050423,cg13465838,cg04532229,cg05021854,cg04297105
chr2	105274249	105276495	3	Yes	promoter	AC013402.5	Yes	8	cg22360016,cg08571918,cg12236088,cg25428553,cg13872005,cg06361238,cg12042187,cg10139947	9	cg22360016,cg08571918,cg12236088,cg25428553,cg13872005,cg16866294,cg06361238,cg12042187,cg10139947
chr2	105458382	105463091	2	Yes	gene body	AC018730.1	Yes	15	cg21188710,cg07171538,cg08944893,cg16465502,cg05900347,cg06122635,cg18252360,cg17529832,cg02013838,cg00001747,cg15910662,cg00619126,cg19267252,cg08189989,cg01826682	13	cg21188710,cg07171538,cg08944893,cg16465502,cg06122635,cg18252360,cg02013838,cg00001747,cg15910662,cg00619126,cg19267252,cg08189989,cg01826682
chr2	105465989	105472373	2	Yes	promoter	AC018730.1,POU3F3,RP11-13J10.1	Yes	22	cg20291049,cg05506365,cg24472231,cg17078686,cg01878345,cg24875029,cg18524739,cg25549459,cg15594205,cg12573849,cg19513834,cg00778995,cg00393837,cg01215936,cg02340018,cg04144973,cg04164184,cg25341423,cg13174337,cg20302975,cg04601957,cg03904013	24	cg20291049,cg05506365,cg17078686,cg01878345,cg24875029,cg18524739,cg25549459,cg15594205,cg12573849,cg00778995,cg00393837,cg11995485,cg19271776,cg07780799,cg01215936,cg02340018,cg14517729,cg04144973,cg04164184,cg25341423,cg13174337,cg20302975,cg04601957,cg03904013
chr2	105477772	105481103	2	Yes	gene body	RP11-13J10.1	Yes	11	cg07112473,cg02488942,cg10538797,cg07214164,cg03928875,cg02177168,cg11014373,cg13899678,cg17912835,cg25758217,cg01886514	11	cg07112473,cg02488942,cg10538797,cg07214164,cg03928875,cg11014373,cg13899678,cg17912835,cg25758217,cg16636772,cg01886514
chr2	105487804	105491006	2	Yes	promoter	AC018730.3	Yes	11	cg26186613,cg00500333,cg13749494,cg07036460,cg07315234,cg03414474,cg25471365,cg03515980,cg12496657,cg14127910,cg16627650	14	cg26186613,cg00500333,cg13749494,cg07036460,cg07315234,cg21443905,cg18923222,cg08926965,cg03414474,cg03927062,cg03515980,cg12496657,cg14127910,cg16627650
chr2	105759560	105761840	1	Yes	promoter	AC104655.3	No	7	cg08998212,cg24824366,cg27062759,cg14700304,cg08378017,cg26029736,cg00612633	11	cg08998212,cg24824366,cg27062759,cg14700304,cg13895722,cg08457213,cg08378017,cg24577003,cg26029736,cg11547984,cg00612633
chr2	106014292	106016429	1	Yes	promoter	FHL2	No	14	cg03136099,cg19025700,cg13754437,cg06907053,cg26344233,cg24079702,cg22454769,cg06639320,cg02445447,cg19753526,cg17291435,cg00824141,cg10349436,cg02054792	14	cg03136099,cg02231204,cg01928691,cg26344233,cg22454769,cg17268658,cg06639320,cg02445447,cg19753526,cg17291435,cg00824141,cg10349436,cg02054792,cg09565706
chr2	107501376	107504871	1	Yes	promoter	ST6GAL2	Yes	19	cg26840082,cg25725843,cg02828023,cg14507868,cg08528626,cg21649258,cg08236767,cg04434339,cg16935065,cg06906472,cg14209299,cg19412467,cg20483857,cg20803857,cg04571163,cg19302831,cg17818308,cg16115841,cg19825856	21	cg22438084,cg26840082,cg25725843,cg14507868,cg17615908,cg08528626,cg11141673,cg21649258,cg08236767,cg04434339,cg16935065,cg06906472,cg14209299,cg19412467,cg20483857,cg20803857,cg04571163,cg19302831,cg17818308,cg16115841,cg19825856
chr2	108602232	108604148	3	Yes	promoter	SLC5A7	No	14	cg06662812,cg20547653,cg07186154,cg26333822,cg16232126,cg26001902,cg18771173,cg14613271,cg05311412,cg11355135,cg17679621,cg03983336,cg17052964,cg22415472	12	cg07186154,cg16232126,cg26001902,cg18771173,cg14613271,cg05311412,cg11355135,cg17679621,cg03983336,cg17052964,cg11591253,cg22415472
chr2	109151149	109153459	3	Yes	promoter	AC012487.2,LIMS1	No	2	cg23176246,cg00203089	2	cg23176246,cg00203089
chr2	109647274	109649287	3	Yes	intergenic	NA	Yes	8	cg07338715,cg02286506,cg12039766,cg14087180,cg02701278,cg12332415,cg08180070,cg12671030	9	cg07338715,cg02286506,cg12039766,cg14087180,cg03017788,cg02701278,cg12332415,cg08180070,cg12671030
chr2	109744147	109747233	2	Yes	promoter	SH3RF3,SH3RF3-AS1	No	19	cg01495363,cg04286823,cg07548255,cg03846641,cg25308803,cg02713669,cg27005794,cg02294055,cg23046629,cg09392940,cg12518410,cg16117910,cg22959667,cg22725460,cg18652923,cg25815021,cg11254085,cg16268848,cg04398391	22	cg01495363,cg04286823,cg07548255,cg03846641,cg25308803,cg02713669,cg27005794,cg02294055,cg21893842,cg23046629,cg09392940,cg06083965,cg12518410,cg16117910,cg22959667,cg10654819,cg26112874,cg22725460,cg18652923,cg11254085,cg16268848,cg04398391
chr2	110372119	110374926	3	Yes	promoter	SEPT10,SOWAHC	No	6	cg19399885,cg22370326,cg21537939,cg03552103,cg17866732,cg20930114	7	cg19399885,cg22370326,cg21537939,cg03552103,cg06665305,cg17866732,cg20930114
chr2	110872349	110874411	3	Yes	promoter	MALL	No	10	cg27638115,cg08721931,cg09113530,cg05979741,cg01615704,cg04397433,cg24919768,cg02560744,cg18950952,cg06621452	12	cg27638115,cg09113530,cg07237106,cg04694015,cg05979741,cg01615704,cg04397433,cg24919768,cg03764357,cg02560744,cg18950952,cg06621452
chr2	111488611	111492509	3	Yes	promoter	ACOXL	No	8	cg16246747,cg16206125,cg12142521,cg07688988,cg15833294,cg10768548,cg05739167,cg02424835	11	cg16246747,cg16206125,cg26911026,cg07688988,cg15833294,cg10768548,cg05739167,cg21414754,cg07873900,cg02424835,cg20246567
chr2	111874203	111880202	2	Yes	promoter	BCL2L11	Yes	26	cg16258445,cg10239074,cg11108060,cg16483490,cg13092766,cg04021674,cg11842141,cg08097121,cg25455438,cg10804090,cg11441894,cg21035422,cg18081430,cg26001287,cg09907170,cg11729679,cg00997280,cg02242681,cg27624162,cg03171003,cg18646521,cg04780086,cg04202892,cg05826458,cg17215170,cg19992207	28	cg16258445,cg10239074,cg11108060,cg16483490,cg13092766,cg04021674,cg11842141,cg08097121,cg25455438,cg10804090,cg11441894,cg21035422,cg18081430,cg26001287,cg20660182,cg11729679,cg01064683,cg00997280,cg02242681,cg27624162,cg03171003,cg18646521,cg04780086,cg04202892,cg05826458,cg17215170,cg03838335,cg19992207
chr2	112656183	112658210	3	Yes	promoter	MERTK	No	4	cg01869273,cg09745087,cg25818813,cg21182454	4	cg01869273,cg09745087,cg25818813,cg21182454
chr2	112894931	112897171	2	Yes	promoter	FBLN7	No	8	cg07181754,cg03249947,cg08020922,cg00930628,cg13886554,cg06024411,cg09862219,cg07880854	7	cg07181754,cg07170020,cg00930628,cg13886554,cg06024411,cg09862219,cg07880854
chr2	112897210	112899025	2	Yes	gene body	FBLN7	No	2	cg17240135,cg09982942	2	cg17240135,cg09982942
chr2	112938839	112940201	3	Yes	gene body	FBLN7	No	3	cg20313969,cg16987524,cg04324615	3	cg20313969,cg16987524,cg04324615
chr2	114033171	114037110	2	Yes	promoter	PAX8	No	14	cg23136554,cg10068464,cg05106191,cg25042226,cg05194362,cg06881093,cg09250933,cg01387625,cg24409539,cg04746199,cg23156509,cg01577475,cg06675538,cg25243455	18	cg23136554,cg10068464,cg05106191,cg12691894,cg27608756,cg25042226,cg15281496,cg05194362,cg22329711,cg06881093,cg09250933,cg01387625,cg24409539,cg04746199,cg23156509,cg01577475,cg06675538,cg25243455
chr2	115917813	115921488	3	Yes	promoter	AC066593.1,DPP10	No	13	cg26842423,cg06828936,cg05667379,cg01886957,cg18759990,cg13777681,cg00089091,cg01718116,cg04075191,cg04617755,cg21678377,cg03753331,cg12666279	19	cg26842423,cg06828936,cg05667379,cg01886957,cg18759990,cg02396380,cg13777681,cg00089091,cg01718116,cg04075191,cg04617755,cg06139786,cg21678377,cg03753331,cg10865628,cg05215127,cg12666279,cg05651963,cg22529999
chr2	118980159	118983346	1	Yes	intergenic	NA	Yes	11	cg18859174,cg05616969,cg03449108,cg15174552,cg23413104,cg05766802,cg06530490,cg05268203,cg10888941,cg00336150,cg00409049	12	cg18859174,cg05616969,cg03449108,cg15174552,cg23413104,cg05766802,cg06530490,cg05268203,cg10888941,cg00336150,cg00409049,cg19263565
chr2	119531541	119533184	3	Yes	intergenic	NA	No	7	cg20583872,cg20593831,cg27664844,cg17456678,cg16585651,cg25618271,cg20932768	7	cg20583872,cg20593831,cg27664844,cg17456678,cg16585651,cg25618271,cg20932768
chr2	119564402	119566929	3	No	intergenic	NA	No	3	cg23620902,cg03675047,cg16326242	3	cg23620902,cg03675047,cg16326242
chr2	119590366	119594500	2	Yes	promoter	RP11-19E11.1	No	13	cg02280281,cg11149930,cg06266613,cg09296407,cg20599967,cg19957905,cg18250846,cg10543450,cg26267388,cg09601912,cg03383508,cg03508786,cg15056288	11	cg02280281,cg11149930,cg27610262,cg23898837,cg20599967,cg19957905,cg18250846,cg10543450,cg09601912,cg03508786,cg15056288
chr2	119599071	119601730	2	Yes	promoter	EN1	No	13	cg21463349,cg26509715,cg16419009,cg02739346,cg22970357,cg15888290,cg16794506,cg21215767,cg21811143,cg20627174,cg26946259,cg20175390,cg10846615	14	cg21463349,cg06484622,cg03254451,cg26509715,cg11831989,cg16419009,cg22970357,cg16794506,cg21215767,cg21811143,cg20627174,cg26946259,cg20175390,cg10846615
chr2	119601783	119607229	2	Yes	promoter	EN1	No	34	cg12418535,cg12305200,cg26990102,cg24001710,cg06946452,cg18962237,cg14274989,cg19613432,cg03266453,cg07419575,cg08050360,cg20585227,cg20804050,cg12231969,cg22714777,cg14297772,cg22231902,cg06704122,cg04960603,cg07529575,cg20359285,cg25927708,cg22030072,cg03883295,cg17167253,cg00654888,cg04034583,cg20248516,cg08825084,cg15724256,cg10895452,cg01165776,cg18009690,cg22007486	32	cg12418535,cg12305200,cg26990102,cg24001710,cg06946452,cg14274989,cg19613432,cg03266453,cg07419575,cg08050360,cg20585227,cg20804050,cg26691477,cg03665271,cg12231969,cg22714777,cg14297772,cg22231902,cg06704122,cg04960603,cg20359285,cg22030072,cg17167253,cg00654888,cg20248516,cg08825084,cg15724256,cg10895452,cg01165776,cg18009690,cg22007486,cg08006495
chr2	119610040	119617638	2	Yes	intergenic	NA	No	26	cg22595460,cg14634534,cg26994225,cg05270938,cg05256483,cg08390877,cg01502588,cg02288088,cg04227922,cg19224201,cg18669186,cg24269074,cg08453483,cg26817334,cg01713485,cg01446203,cg19575372,cg18173235,cg07935790,cg12507795,cg26425256,cg05731870,cg24765360,cg17342925,cg08138685,cg12962078	24	cg22595460,cg14634534,cg26994225,cg01430795,cg05270938,cg05256483,cg08390877,cg01502588,cg02288088,cg04227922,cg08453483,cg26817334,cg01713485,cg01446203,cg19575372,cg18173235,cg12507795,cg26425256,cg05731870,cg24765360,cg05068341,cg17342925,cg08138685,cg12962078
chr2	119912380	119917097	2	Yes	promoter	C1QL2	No	18	cg12891160,cg16849609,cg17319142,cg15931721,cg07212778,cg21858380,cg26530498,cg00690148,cg20470857,cg10996058,cg15089219,cg11873147,cg00820718,cg07090701,cg25048344,cg05839767,cg08011119,cg10946295	20	cg27402871,cg19774368,cg12891160,cg16849609,cg17319142,cg15931721,cg07212778,cg26530498,cg00690148,cg20470857,cg10996058,cg26875812,cg15089219,cg11873147,cg00820718,cg07090701,cg25048344,cg05839767,cg08011119,cg10946295
chr2	119980332	119982750	3	Yes	promoter	STEAP3	No	11	cg14882150,cg06872331,cg25508118,cg05270572,cg23164999,cg16820739,cg25845374,cg18643762,cg04749104,cg25101327,cg00590251	10	cg14882150,cg06872331,cg25508118,cg05270572,cg23164999,cg16820739,cg18643762,cg04749104,cg25101327,cg00590251
chr2	120189397	120191123	3	Yes	promoter	TMEM37	Yes	5	cg13601855,cg08076266,cg09715353,cg09474442,cg24226528	6	cg27142148,cg13601855,cg08076266,cg09715353,cg09474442,cg24226528
chr2	120280796	120282668	3	Yes	promoter	SCTR	No	11	cg01897036,cg20296532,cg14339007,cg26009192,cg08451726,cg07176264,cg20505223,cg01013590,cg15250797,cg25406619,cg21082557	12	cg01897036,cg20296532,cg14339007,cg27397893,cg26009192,cg08451726,cg05857967,cg07176264,cg01013590,cg15250797,cg25406619,cg21082557
chr2	120979721	120982170	1	Yes	promoter	TMEM185B	No	10	cg25936380,cg06194119,cg07988989,cg14776093,cg19865616,cg08408563,cg07679725,cg20097650,cg20234855,cg01315092	11	cg25936380,cg06194119,cg07988989,cg14776093,cg19865616,cg08408563,cg07679725,cg20097650,cg05274172,cg20234855,cg01315092
chr2	121010578	121012371	3	Yes	promoter	RALB	Yes	4	cg11305121,cg10984017,cg02994216,cg24857294	5	cg00656630,cg11305121,cg10984017,cg02994216,cg24857294
chr2	121100626	121106876	2	Yes	promoter	INHBB	No	23	cg08065733,cg00421221,cg03175975,cg26035105,cg06342317,cg07736658,cg24009722,cg04439159,cg20925841,cg24617696,cg03699182,cg02173749,cg19089337,cg07197823,cg27476576,cg23397015,cg06905913,cg17147182,cg04065338,cg21840697,cg03809147,cg04019016,cg00280895	21	cg08065733,cg00421221,cg03175975,cg26035105,cg06342317,cg07736658,cg04439159,cg20925841,cg24617696,cg03699182,cg02173749,cg19089337,cg27476576,cg12722021,cg23397015,cg06905913,cg17147182,cg04065338,cg03809147,cg04019016,cg00280895
chr2	121199142	121201570	1	Yes	intergenic	NA	Yes	9	cg05881221,cg21856256,cg03699623,cg26307218,cg09563922,cg23561934,cg04663790,cg17460441,cg07010075	10	cg25369795,cg05881221,cg21856256,cg03699623,cg26307218,cg09563922,cg23561934,cg04663790,cg17460441,cg07010075
chr2	121343880	121346111	3	Yes	intergenic	NA	No	4	cg20067049,cg25756780,cg27114644,cg18989909	4	cg20067049,cg25756780,cg27114644,cg18989909
chr2	121832667	121834991	1	No	intergenic	NA	No	2	cg04225368,cg09678035	3	cg04225368,cg09678035,cg10909581
chr2	122040873	122043543	3	Yes	promoter	TFCP2L1	No	10	cg20870885,cg27359308,cg16629158,cg00741946,cg20025003,cg10899637,cg02906238,cg14557510,cg12366772,cg01212071	10	cg20870885,cg27359308,cg16629158,cg00741946,cg20025003,cg10899637,cg02906238,cg14557510,cg12366772,cg01212071
chr2	124781618	124784120	3	Yes	promoter	AC079154.1,CNTNAP5	No	12	cg13277493,cg16198087,cg01308258,cg11344566,cg08790440,cg04168670,cg12919006,cg18582824,cg13358636,cg03696599,cg08523865,cg11712936	12	cg13277493,cg16198087,cg01308258,cg11344566,cg08790440,cg04168670,cg12919006,cg18582824,cg13358636,cg03696599,cg08523865,cg11712936
chr2	127862837	127864858	1	Yes	promoter	BIN1	Yes	5	cg10353870,cg23667267,cg04095651,cg07661177,cg00091827	6	cg10353870,cg01064917,cg23667267,cg25517034,cg04095651,cg07661177
chr2	127974858	127979188	1	Yes	promoter	CYP27C1	Yes	11	cg11039476,cg05143735,cg14580502,cg00270778,cg22273427,cg16660274,cg22709563,cg11107669,cg14261272,cg14706852,cg03486991	14	cg11039476,cg05143735,cg27656707,cg14580502,cg16761716,cg00270778,cg22273427,cg16660274,cg22709563,cg11107669,cg14261272,cg14706852,cg03486991,cg09265623
chr2	128172990	128174464	3	Yes	intergenic	NA	Yes	4	cg02473600,cg24430189,cg23217025,cg08425187	5	cg02473600,cg24430189,cg23217025,cg08425187,cg01875648
chr2	128179697	128181937	3	Yes	promoter	MIR4783	No	6	cg16348316,cg09747827,cg03422204,cg20385508,cg01312997,cg08621843	6	cg16348316,cg09747827,cg03422204,cg20385508,cg01312997,cg08621843
chr2	128431494	128434196	3	Yes	promoter	LIMS2	No	9	cg23966569,cg07262244,cg08385249,cg09131629,cg14664764,cg14282137,cg17976576,cg26342671,cg06107159	12	cg08587872,cg23966569,cg07262244,cg08385249,cg09131629,cg14664764,cg17976576,cg26342671,cg06107159,cg05855166,cg06192618,cg19479517
chr2	128989881	128991854	3	Yes	intergenic	NA	No	7	cg19578183,cg23366762,cg08417702,cg19925427,cg02006803,cg22593554,cg19124521	6	cg23366762,cg08417702,cg19925427,cg02006803,cg22593554,cg19124521
chr2	130680049	130681748	3	No	promoter	AC079776.3	No	3	cg10011199,cg04778433,cg17578196	6	cg06095190,cg10011199,cg04778433,cg17578196,cg12865308,cg15858554
chr2	130736837	130738494	3	Yes	promoter	AC079776.7,RAB6C	No	5	cg25181900,cg09676860,cg06288154,cg10010257,cg23331626	9	cg15884874,cg16830328,cg25181900,cg09676860,cg06288154,cg10010257,cg23331626,cg18923912,cg05815430
chr2	131112237	131114791	3	Yes	promoter	PTPN18	Yes	8	cg12815916,cg11040329,cg11216682,cg08879546,cg18661819,cg05209645,cg09487245,cg26160573	10	cg12815916,cg11040329,cg11216682,cg08879546,cg18661819,cg05209645,cg09487245,cg26160573,cg13537328,cg26507630
chr2	131512199	131515215	3	Yes	promoter	AC140481.8,AMER3	No	20	cg18335505,cg03882167,cg23606718,cg01725586,cg18194734,cg09987596,cg13381486,cg24750614,cg25784308,cg16146322,cg25816545,cg13010502,cg18396137,cg10204868,cg17177632,cg26301353,cg05184394,cg19256400,cg01093878,cg13419390	25	cg18335505,cg03882167,cg23606718,cg11459590,cg01725586,cg04119747,cg18194734,cg09987596,cg20904495,cg13381486,cg24750614,cg25784308,cg16146322,cg23992208,cg25816545,cg13010502,cg18396137,cg10204868,cg17177632,cg26301353,cg05184394,cg19256400,cg01093878,cg13419390,cg16147202
chr2	131555101	131557067	3	Yes	intergenic	NA	Yes	3	cg14912350,cg05309094,cg03757871	5	cg02929052,cg00943565,cg14912350,cg05309094,cg03757871
chr2	131593662	131596073	3	Yes	promoter	AC133785.1,ARHGEF4	No	5	cg08901662,cg03750144,cg01179012,cg17148976,cg07891081	10	cg08901662,cg03750144,cg01179012,cg17148976,cg03651895,cg19809290,cg03132363,cg22232047,cg07891081,cg09082284
chr2	131720396	131722773	3	Yes	gene body	ARHGEF4	No	9	cg17084937,cg10004780,cg22572908,cg22098115,cg22061831,cg11723713,cg26820055,cg13803013,cg25917423	7	cg17084937,cg10004780,cg22572908,cg22061831,cg11723713,cg26820055,cg13803013
chr2	131791331	131794109	3	Yes	promoter	ARHGEF4	Yes	6	cg16850254,cg13024709,cg02699332,cg02913521,cg13061249,cg02917889	11	cg01115428,cg16850254,cg12691016,cg13024709,cg02699332,cg04420083,cg23123222,cg14451598,cg02913521,cg13061249,cg02917889
chr2	132429599	132432108	3	Yes	intergenic	NA	No	8	cg06481920,cg25814715,cg09858655,cg08571287,cg00371950,cg20191959,cg09894655,cg17321385	8	cg06481920,cg25814715,cg09858655,cg08571287,cg00371950,cg20191959,cg09894655,cg17321385
chr2	132766836	132768942	3	Yes	intergenic	NA	No	3	cg06525231,cg25592918,cg26314806	3	cg06525231,cg25592918,cg26314806
chr2	132794664	132797005	3	Yes	intergenic	NA	No	3	cg14732013,cg11818149,cg13582542	3	cg14732013,cg11818149,cg13582542
chr2	133109199	133111852	1	Yes	intergenic	NA	Yes	4	cg02350644,cg13461950,cg06718920,cg17146127	5	cg02350644,cg13687331,cg13461950,cg06718920,cg17146127
chr2	133172877	133175371	3	Yes	promoter	GPR39	No	13	cg19309079,cg13954965,cg07785936,cg02570563,cg22866015,cg13136510,cg23410738,cg26234787,cg04664153,cg24659201,cg08225642,cg16174348,cg12516767	13	cg19309079,cg13954965,cg07785936,cg02570563,cg22866015,cg13136510,cg23410738,cg26234787,cg04664153,cg08225642,cg16174348,cg12516767,cg20909145
chr2	133424657	133429753	2	Yes	promoter	LYPD1	No	20	cg00937742,cg20273260,cg04462652,cg26348348,cg08613144,cg15665400,cg09622982,cg01850449,cg20265661,cg07716249,cg07062885,cg25571189,cg06016439,cg17112958,cg23724641,cg17674725,cg13016408,cg12680750,cg15506477,cg04120400	23	cg00937742,cg04462652,cg26348348,cg08613144,cg15665400,cg09622982,cg01850449,cg22775776,cg20265661,cg07716249,cg16076615,cg26536440,cg07062885,cg19746329,cg25571189,cg06016439,cg17112958,cg23724641,cg17674725,cg13016408,cg12680750,cg15506477,cg04120400
chr2	134022665	134025384	3	Yes	promoter	AC010890.1	No	7	cg09597470,cg06296331,cg03992259,cg22232500,cg12915892,cg20514322,cg00055359	9	cg09597470,cg06296331,cg03992259,cg22232500,cg12915892,cg20514322,cg02405538,cg17762933,cg17592802
chr2	135474192	135477541	3	Yes	promoter	TMEM163	No	13	cg22242207,cg15297650,cg10025300,cg08343042,cg25476312,cg17319374,cg19589919,cg23057992,cg03556069,cg24890043,cg10884052,cg11292593,cg20854539	13	cg22242207,cg15297650,cg10025300,cg25476312,cg17319374,cg19589919,cg12061775,cg03556069,cg23303415,cg24890043,cg10884052,cg11292593,cg20854539
chr2	136872862	136878243	1	Yes	promoter	CXCR4	No	25	cg18443412,cg06679534,cg17398233,cg20366284,cg03101422,cg04513185,cg06332859,cg05303524,cg21859434,cg26425669,cg20823742,cg00591844,cg12311057,cg25982140,cg03608167,cg22376465,cg16675708,cg13854983,cg22923827,cg19238531,cg02902079,cg10718991,cg10824187,cg02367708,cg07784959	26	cg18443412,cg06679534,cg17398233,cg20366284,cg03101422,cg04513185,cg06332859,cg05303524,cg21859434,cg26425669,cg20823742,cg00591844,cg12311057,cg04109230,cg25982140,cg03608167,cg22376465,cg16675708,cg13854983,cg22923827,cg02902079,cg10718991,cg10824187,cg01922378,cg02367708,cg07784959
chr2	137521676	137525037	2	Yes	promoter	THSD7B	No	8	cg01418256,cg12346874,cg06859084,cg19144684,cg20691140,cg15069295,cg03190505,cg17300353	9	cg01418256,cg12346874,cg06859084,cg19144684,cg20691140,cg15069295,cg03190505,cg17300353,cg20416831
chr2	139535226	139539819	1	Yes	promoter	NXPH2	Yes	14	cg25430507,cg08010094,cg24608381,cg23302570,cg15175143,cg00593536,cg00804628,cg14923640,cg18150439,cg10989763,cg17169699,cg02081701,cg00697992,cg03485608	14	cg25430507,cg08010094,cg24608381,cg23302570,cg15175143,cg00593536,cg00804628,cg20331795,cg14923640,cg18150439,cg10989763,cg02081701,cg00697992,cg03485608
chr2	142887079	142889860	3	Yes	promoter	LRP1B	Yes	13	cg02488702,cg00821600,cg00603435,cg22830273,cg07811212,cg16209652,cg21484213,cg02322989,cg08026618,cg10634922,cg20443778,cg12456269,cg02311960	15	cg25429092,cg15015823,cg00785652,cg02488702,cg00603435,cg22830273,cg07811212,cg16209652,cg21484213,cg02322989,cg08026618,cg10634922,cg20443778,cg12456269,cg02311960
chr2	143783593	143784930	3	No	gene body	KYNU	No	2	cg05058758,cg14252236	1	cg05058758
chr2	144693713	144696265	3	Yes	promoter	AC016910.1	No	6	cg09667303,cg16263943,cg05545132,cg01626326,cg00020622,cg12796383	9	cg09667303,cg16263943,cg05545132,cg01626326,cg00020622,cg27443856,cg12450224,cg22502570,cg12796383
chr2	145266438	145279529	2	Yes	promoter	ZEB2,ZEB2-AS1	No	31	cg17594003,cg00602811,cg00573770,cg15377518,cg04836221,cg26522240,cg00323965,cg09670616,cg19123296,cg14421309,cg07246225,cg03424727,cg23639412,cg20177310,cg19190728,cg13887004,cg15120754,cg21701531,cg17751438,cg11540007,cg10319512,cg13807970,cg01975483,cg05961935,cg15611897,cg04640885,cg09596336,cg23095192,cg19353947,cg25296103,cg12571570	47	cg13366716,cg10369145,cg08268848,cg22267613,cg16267679,cg00602811,cg00573770,cg05322294,cg15377518,cg24488281,cg04836221,cg26522240,cg00323965,cg09670616,cg19123296,cg14421309,cg07246225,cg03424727,cg23639412,cg19101754,cg03625547,cg01497214,cg14022841,cg22960357,cg19865873,cg01502462,cg23267345,cg20177310,cg13511862,cg08006275,cg14388092,cg19190728,cg13887004,cg15120754,cg21701531,cg17751438,cg1…
chr2	145279678	145281730	3	No	intergenic	NA	No	5	cg25325588,cg02146368,cg26359150,cg04021592,cg00782200	4	cg25325588,cg02146368,cg26359150,cg04021592
chr2	149894162	149896528	3	Yes	promoter	LYPD6B	No	10	cg04211175,cg00378144,cg12931682,cg18946117,cg23318986,cg02533787,cg07413941,cg06574335,cg24027965,cg13149736	10	cg04211175,cg00378144,cg12931682,cg18946117,cg24841540,cg02533787,cg07413941,cg24027965,cg19840088,cg13149736
chr2	150187080	150189247	3	Yes	promoter	LYPD6	No	3	cg13793854,cg03933572,cg04021856	4	cg13793854,cg03933572,cg04021856,cg15586429
chr2	152953504	152956742	2	Yes	promoter	AC079790.2,CACNB4	No	17	cg19046253,cg12573935,cg18272264,cg23060456,cg02028389,cg04087237,cg12059226,cg26445292,cg03172996,cg18334412,cg02953275,cg16111791,cg17014009,cg12907983,cg03563100,cg00539908,cg06639870	19	cg19046253,cg12573935,cg18272264,cg23060456,cg02028389,cg10911952,cg04087237,cg12059226,cg26445292,cg02389743,cg23086750,cg03172996,cg18334412,cg02953275,cg16111791,cg17014009,cg12907983,cg03563100,cg00539908
chr2	154727000	154730859	1	Yes	promoter	GALNT13	Yes	19	cg23762263,cg24412079,cg17130964,cg14630357,cg26660002,cg18118685,cg01011748,cg25703346,cg13101087,cg10033761,cg12079322,cg02593932,cg07547000,cg26983710,cg12424785,cg14635767,cg21998983,cg12398124,cg08042220	23	cg23762263,cg24412079,cg17130964,cg14630357,cg26660002,cg18118685,cg01011748,cg25703346,cg13101087,cg10033761,cg12079322,cg08919742,cg02593932,cg14739151,cg07547000,cg26983710,cg12424785,cg14635767,cg21998983,cg12398124,cg16165976,cg02774630,cg08042220
chr2	155553198	155556717	3	Yes	promoter	AC061961.2,KCNJ3	No	14	cg03601797,cg01231108,cg08022436,cg18481230,cg12276123,cg09408768,cg11856810,cg25534294,cg24693368,cg11706467,cg23491599,cg17300051,cg25932748,cg14574037	19	cg03601797,cg01231108,cg08022436,cg18481230,cg12276123,cg11030481,cg09408768,cg11856810,cg25534294,cg24693368,cg11706467,cg23491599,cg19023359,cg00622661,cg07934030,cg17117827,cg17300051,cg25932748,cg14574037
chr2	157175750	157180409	2	Yes	intergenic	NA	No	16	cg02916962,cg22855933,cg05611723,cg16700364,cg18786593,cg02743713,cg11805669,cg11856078,cg14471364,cg25371385,cg20998319,cg02683759,cg06232130,cg13176012,cg14912644,cg08077071	13	cg02916962,cg22855933,cg05611723,cg18786593,cg02743713,cg11805669,cg11856078,cg25371385,cg02683759,cg06232130,cg13176012,cg14912644,cg08077071
chr2	157183826	157187344	2	Yes	promoter	NR4A2	No	16	cg00426720,cg21226516,cg20398418,cg14811105,cg00194126,cg11358945,cg06101180,cg17654050,cg00240195,cg03339537,cg27074041,cg18941818,cg20570611,cg09906382,cg02964555,cg00558219	18	cg14617996,cg11399967,cg11209121,cg21226516,cg20398418,cg14811105,cg00194126,cg11358945,cg06101180,cg17654050,cg00240195,cg03339537,cg27074041,cg18941818,cg20570611,cg09906382,cg02964555,cg00558219
chr2	157187811	157192698	3	Yes	promoter	NR4A2	Yes	19	cg12335829,cg26872149,cg21086083,cg05694870,cg16151636,cg11379337,cg13945301,cg23474904,cg07646377,cg01123282,cg03953709,cg20945253,cg16246410,cg18881247,cg20804199,cg15699971,cg09408520,cg25247969,cg24651504	22	cg12335829,cg26872149,cg21086083,cg05694870,cg16151636,cg11379337,cg13945301,cg23474904,cg07646377,cg01123282,cg03953709,cg20945253,cg07108936,cg21506655,cg16246410,cg18881247,cg20804199,cg15699971,cg09408520,cg25247969,cg11932911,cg25127975
chr2	158483975	158486363	3	Yes	promoter	ACVR1C	No	11	cg08651064,cg05010623,cg16155655,cg18156033,cg09667023,cg17868920,cg18004523,cg12698343,cg19617792,cg18638253,cg07947490	12	cg14635198,cg19628881,cg08651064,cg05010623,cg18156033,cg09667023,cg17868920,cg18004523,cg19617792,cg18638253,cg07947490,cg16230143
chr2	158788275	158790980	3	No	gene body	UPP2	No	1	cg13809915	2	cg13809915,cg15486101
chr2	159823480	159827539	1	Yes	promoter	TANC1	No	11	cg07454558,cg19019321,cg01396143,cg01754028,cg16891298,cg15160780,cg24664570,cg27412987,cg02801482,cg21446930,cg06961147	13	cg07454558,cg19019321,cg01754028,cg16891298,cg15160780,cg24664570,cg27412987,cg12860092,cg02801482,cg21446930,cg06961147,cg24666046,cg08494494
chr2	160653307	160655489	3	Yes	promoter	CD302	No	10	cg09643312,cg03432176,cg15352315,cg20730198,cg09248944,cg24859623,cg20351640,cg15923513,cg04735129,cg08347373	12	cg17207944,cg20062413,cg09643312,cg03432176,cg15352315,cg20187653,cg20730198,cg09248944,cg20351640,cg15923513,cg04735129,cg08347373
chr2	160760030	160762096	1	Yes	promoter	LY75,LY75-CD302	No	10	cg15026998,cg10107725,cg01092293,cg14819504,cg00268019,cg18514922,cg02280532,cg24478096,cg06573604,cg23995753	13	cg01701286,cg15026998,cg10107725,cg13557231,cg01092293,cg14819504,cg10699296,cg00268019,cg18514922,cg02280532,cg24478096,cg06573604,cg23995753
chr2	160917738	160920335	3	Yes	promoter	PLA2R1	No	14	cg24235037,cg20257553,cg12991125,cg19699840,cg11228250,cg15703221,cg25997500,cg26873705,cg20357910,cg10825876,cg22279027,cg14584448,cg04367351,cg14898416	13	cg17998522,cg24235037,cg20257553,cg12991125,cg11228250,cg15703221,cg25997500,cg26873705,cg10825876,cg22279027,cg14584448,cg04367351,cg14898416
chr2	162092980	162096843	3	Yes	gene body	AC009299.2	Yes	13	cg22898145,cg06833102,cg04196143,cg15970666,cg00164196,cg17651973,cg19889017,cg26915774,cg09064687,cg10525980,cg00322319,cg21211367,cg25487775	13	cg22898145,cg06833102,cg04196143,cg15970666,cg00164196,cg17651973,cg08695077,cg19889017,cg26915774,cg09064687,cg00322319,cg21211367,cg25487775
chr2	162269864	162276103	2	Yes	promoter	TBR1	No	30	cg00018128,cg10997718,cg21949512,cg00462525,cg06148480,cg07419021,cg02767242,cg14416523,cg22743761,cg12974733,cg22794704,cg26210445,cg19583211,cg07687349,cg10395317,cg14187678,cg04004632,cg21431041,cg10954251,cg20994660,cg02283775,cg09019329,cg06747888,cg06521615,cg07548213,cg26202915,cg21389901,cg08184652,cg23313126,cg27503015	39	cg02864225,cg00018128,cg10997718,cg15638502,cg21949512,cg00462525,cg06148480,cg07419021,cg02767242,cg03934905,cg05757789,cg13853159,cg23866866,cg02856004,cg14416523,cg22743761,cg12974733,cg22794704,cg26210445,cg19583211,cg07687349,cg10395317,cg14187678,cg20741922,cg04004632,cg21431041,cg10954251,cg20994660,cg02283775,cg09019329,cg06747888,cg06521615,cg07548213,cg11298735,cg26202915,cg21389901,cg0…
chr2	162279417	162281483	2	Yes	promoter	AC009487.4,AC009487.5	No	7	cg12757011,cg12520549,cg06382344,cg06488443,cg06942701,cg05301866,cg14557487	8	cg12757011,cg12520549,cg06382344,cg12634236,cg06488443,cg06942701,cg05301866,cg14557487
chr2	162282956	162285095	2	Yes	gene body	AC009487.5	No	12	cg11704490,cg22677715,cg27322846,cg03457195,cg16653620,cg27404023,cg01983682,cg10945079,cg01419831,cg00303183,cg09019936,cg23161999	12	cg11704490,cg22677715,cg27322846,cg03457195,cg16653620,cg27404023,cg01983682,cg10945079,cg01419831,cg00303183,cg09019936,cg23161999
chr2	162480318	162483074	3	No	promoter	SLC4A10	Yes	5	cg02713266,cg16640027,cg15240455,cg09715906,cg20361238	11	cg27462488,cg26678325,cg02713266,cg10034259,cg16640027,cg07123668,cg13327466,cg15240455,cg09715906,cg20361238,cg15975205
chr2	162929343	162931914	1	Yes	promoter	AC008063.2,DPP4	No	12	cg23246095,cg11460364,cg21565914,cg12335708,cg25912827,cg09601770,cg10507402,cg20053454,cg10112391,cg18892517,cg14022057,cg19350270	12	cg23246095,cg21565914,cg25912827,cg09601770,cg10507402,cg20053454,cg10112391,cg01907512,cg14022057,cg16617101,cg19350270,cg24827032
chr2	163174046	163176110	3	No	promoter	GCA,IFIH1	No	9	cg16971745,cg09755666,cg02276086,cg23553385,cg06347928,cg24885055,cg19533050,cg07348311,cg00531628	14	cg19965693,cg23280745,cg16971745,cg09755666,cg21810130,cg02276086,cg02029939,cg18340987,cg23553385,cg06347928,cg24885055,cg19533050,cg07348311,cg00531628
chr2	163694170	163696644	3	No	promoter	KCNH7	Yes	9	cg07150045,cg09454925,cg21302951,cg25668368,cg19965810,cg12302070,cg26974327,cg10132588,cg14781189	9	cg07150045,cg09454925,cg21302951,cg25668368,cg19965810,cg12302070,cg08315168,cg10132588,cg14781189
chr2	166648085	166653192	1	Yes	promoter	AC009495.2,GALNT3	Yes	14	cg02764346,cg25492645,cg11009335,cg20146030,cg13169065,cg10830649,cg24217704,cg24678095,cg05569109,cg22280705,cg25799994,cg15307891,cg00999988,cg02345886	18	cg06015379,cg16583230,cg02764346,cg25492645,cg11009335,cg15277489,cg18741205,cg20146030,cg13169065,cg10830649,cg24217704,cg24678095,cg05569109,cg22280705,cg25799994,cg24164798,cg00999988,cg02345886
chr2	167350113	167351654	3	No	intergenic	NA	No	2	cg06038864,cg14771658	2	cg06038864,cg14771658
chr2	168149639	168153081	3	Yes	promoter	AC074363.1	Yes	6	cg11369761,cg12990337,cg26275470,cg11991058,cg12769138,cg12944197	7	cg11369761,cg12635454,cg12990337,cg26275470,cg11991058,cg12769138,cg12944197
chr2	170216879	170222298	2	Yes	promoter	LRP2	Yes	19	cg04304352,cg15458585,cg02240066,cg09642640,cg02874371,cg08580631,cg01329010,cg25554917,cg03019033,cg02714065,cg16691888,cg16585827,cg21645864,cg13436799,cg05660179,cg11403874,cg00726174,cg01400477,cg02361027	22	cg04304352,cg15458585,cg02240066,cg09642640,cg02874371,cg08580631,cg01329010,cg25554917,cg03019033,cg02714065,cg24606651,cg13647055,cg16691888,cg16585827,cg10131219,cg13436799,cg05660179,cg11403874,cg00726174,cg01400477,cg02361027,cg09451775
chr2	170335305	170337247	3	Yes	promoter	BBS5,RP11-724O16.1	No	9	cg11947548,cg24812891,cg05847778,cg06202686,cg10536369,cg10006582,cg14386850,cg17792658,cg04064028	11	cg11947548,cg05847778,cg06202686,cg10536369,cg14402326,cg10006582,cg14386850,cg10616973,cg17792658,cg04064028,cg21963720
chr2	171566484	171577174	2	Yes	promoter	AC007405.2,SP5	No	39	cg21348357,cg20196537,cg18183163,cg21829923,cg00858840,cg24772753,cg07813142,cg01042246,cg01571735,cg18798922,cg12045337,cg07013787,cg22071224,cg26766005,cg14768335,cg15377586,cg17873451,cg04906879,cg24648594,cg06272543,cg19382919,cg24071726,cg23393521,cg06755413,cg10399165,cg27212729,cg20939723,cg14108789,cg02235249,cg08386537,cg07363270,cg22699676,cg05301383,cg02227919,cg04257984,cg17124829,cg2…	39	cg21348357,cg20196537,cg21829923,cg00858840,cg24772753,cg07813142,cg01042246,cg01571735,cg18798922,cg12045337,cg10266332,cg07013787,cg17606996,cg22071224,cg26766005,cg14768335,cg15377586,cg17873451,cg04906879,cg24648594,cg06272543,cg19382919,cg24071726,cg06755413,cg10399165,cg27212729,cg20939723,cg14108789,cg02235249,cg08386537,cg07363270,cg22699676,cg05301383,cg02227919,cg04257984,cg17124829,cg2…
chr2	171669208	171681064	2	Yes	promoter	AC007405.8,GAD1	Yes	40	cg07620853,cg08863440,cg19846314,cg21535772,cg15753746,cg00729049,cg04105250,cg15126544,cg02723395,cg09144707,cg14486905,cg14005211,cg01089319,cg01089249,cg07420274,cg11281641,cg01763173,cg16911423,cg26391350,cg19538089,cg15306595,cg11582100,cg00915206,cg23221504,cg09742688,cg03448612,cg13612847,cg00782607,cg03443455,cg09404592,cg27293992,cg17781710,cg14545305,cg17587327,cg12801329,cg00860808,cg0…	57	cg07620853,cg08863440,cg19846314,cg21535772,cg15753746,cg00729049,cg04105250,cg15126544,cg02723395,cg09144707,cg12914459,cg14486905,cg14005211,cg01089319,cg07420274,cg16457440,cg09390870,cg20153409,cg05032498,cg15993538,cg11281641,cg25264004,cg11266473,cg02510467,cg24202654,cg00055595,cg01763173,cg19374317,cg06137439,cg16911423,cg09724301,cg26391350,cg19538089,cg15306595,cg03498913,cg15509969,cg1…
chr2	172947000	172953781	2	Yes	promoter	DLX1	No	38	cg01244270,cg07181565,cg12762816,cg15552158,cg07936950,cg03479694,cg05938001,cg10709593,cg12308746,cg17737681,cg13343818,cg00822840,cg18147215,cg16347858,cg05094081,cg12270119,cg27378835,cg26067250,cg05194810,cg21038382,cg11575738,cg18619591,cg08530978,cg06996609,cg03141620,cg22977876,cg15941449,cg16652259,cg17780624,cg10791926,cg07130890,cg15236866,cg24228707,cg02218496,cg13372879,cg04782776,cg0…	39	cg01244270,cg07181565,cg15552158,cg07936950,cg03479694,cg05938001,cg10709593,cg12308746,cg17737681,cg13343818,cg05503424,cg09917205,cg00822840,cg18147215,cg16347858,cg05094081,cg12270119,cg27378835,cg26067250,cg05194810,cg21038382,cg11575738,cg18619591,cg08530978,cg06996609,cg03141620,cg24091001,cg25596575,cg00959846,cg15941449,cg16652259,cg17780624,cg07130890,cg15236866,cg24228707,cg02218496,cg1…
chr2	172958015	172962821	2	Yes	intergenic	NA	Yes	12	cg05269451,cg05572456,cg06040206,cg22309696,cg11992621,cg11987534,cg08508041,cg11457119,cg02090160,cg13433278,cg16573755,cg04522045	13	cg05269451,cg05572456,cg06040206,cg22309696,cg11992621,cg11987534,cg08508041,cg11457119,cg02090160,cg13433278,cg17064434,cg16573755,cg04522045
chr2	172962879	172968715	2	Yes	promoter	AC104801.1,DLX2	No	28	cg20434178,cg02014107,cg16057598,cg23763424,cg01369278,cg01111397,cg08721076,cg15326320,cg03707948,cg26002103,cg20361600,cg16416045,cg16756631,cg08581737,cg03657766,cg23461870,cg02491396,cg22061628,cg07023704,cg27136740,cg08351004,cg07687548,cg02728483,cg23288335,cg17824923,cg05793406,cg05462328,cg04440182	25	cg20434178,cg02014107,cg16057598,cg23763424,cg01369278,cg01111397,cg08721076,cg15326320,cg03707948,cg26002103,cg20361600,cg16756631,cg03657766,cg23461870,cg22061628,cg15964256,cg07023704,cg27136740,cg08351004,cg07687548,cg02728483,cg23288335,cg17824923,cg05793406,cg05462328
chr2	172970031	172972073	2	Yes	gene body	AC104801.1	No	4	cg02565529,cg21047823,cg05532414,cg09483270	5	cg02565529,cg21047823,cg05532414,cg09483270,cg06835557
chr2	173098627	173101265	3	Yes	intergenic	NA	No	6	cg11811212,cg08748100,cg17066470,cg08900106,cg26470101,cg01418539	7	cg11811212,cg08748100,cg17066470,cg26470101,cg06016850,cg10867701,cg01418539
chr2	173599730	173602033	3	Yes	promoter	RAPGEF4,RAPGEF4-AS1	No	13	cg14234152,cg22104578,cg10076031,cg25074751,cg14836450,cg07917406,cg00559939,cg00997611,cg10508295,cg14796127,cg14379854,cg09001028,cg19975218	13	cg14234152,cg22104578,cg10076031,cg25074751,cg14836450,cg07917406,cg00559939,cg00997611,cg14796127,cg14379854,cg22782232,cg09001028,cg19975218
chr2	174265179	174267949	3	No	intergenic	NA	No	3	cg17928799,cg23547097,cg27534957	2	cg27350589,cg23547097
chr2	175189611	175194512	2	Yes	promoter	AC018470.4	No	18	cg00306909,cg19049194,cg19488874,cg16046561,cg27209578,cg13886334,cg10189962,cg15608483,cg17146526,cg25592526,cg16625109,cg02583633,cg11424198,cg03999216,cg02809707,cg05298922,cg02091526,cg02787917	22	cg00306909,cg19049194,cg19488874,cg16046561,cg27209578,cg13886334,cg15608483,cg17146526,cg25592526,cg16625109,cg02583633,cg11424198,cg03999216,cg02809707,cg05298922,cg02091526,cg02787917,cg26333000,cg01895649,cg02216981,cg03626299,cg05964536
chr2	175195377	175210150	2	Yes	promoter	AC018470.1,SP9	No	54	cg19618955,cg25047379,cg16450590,cg06973615,cg15126975,cg23064609,cg00178897,cg19221620,cg15744668,cg11855516,cg09684233,cg11761729,cg10256121,cg01381636,cg10828660,cg27078140,cg09344183,cg01469887,cg11982293,cg19849509,cg00083046,cg11664139,cg01898964,cg02728209,cg00054771,cg00827989,cg00582316,cg00153110,cg02071005,cg00410370,cg01269597,cg08575330,cg03249890,cg11418477,cg04105760,cg17964510,cg0…	52	cg19618955,cg25047379,cg06973615,cg15126975,cg23064609,cg00178897,cg19221620,cg15744668,cg11855516,cg09684233,cg11761729,cg10256121,cg01381636,cg17160437,cg10828660,cg27078140,cg09344183,cg01469887,cg11982293,cg19849509,cg00083046,cg11664139,cg01898964,cg02728209,cg00054771,cg00827989,cg00582316,cg00153110,cg02071005,cg00410370,cg01269597,cg08575330,cg03249890,cg11418477,cg04105760,cg17964510,cg0…
chr2	175350276	175351871	3	Yes	promoter	AC010894.3,GPR155	No	6	cg00934611,cg22190861,cg19759282,cg14014604,cg24722346,cg25586410	6	cg00934611,cg22190861,cg19759282,cg14014604,cg24722346,cg25586410
chr2	175545733	175549274	3	Yes	promoter	WIPF1	No	11	cg13651986,cg13999188,cg21620778,cg09464488,cg25075147,cg03573824,cg25537217,cg01908537,cg26831241,cg01356950,cg00405190	15	cg13651986,cg13999188,cg10171960,cg20455157,cg21620778,cg07203784,cg08256451,cg24363059,cg09464488,cg25075147,cg03573824,cg25537217,cg26831241,cg01356950,cg00405190
chr2	175593928	175595845	3	Yes	gene body	AC018890.6	No	6	cg13526756,cg03293603,cg14006096,cg11246222,cg18921980,cg04902302	6	cg13526756,cg03293603,cg14006096,cg11246222,cg18921980,cg04902302
chr2	176943047	176946244	2	Yes	gene body	EVX2	No	12	cg01658421,cg05467160,cg14715696,cg13264399,cg03182917,cg02274048,cg20398486,cg17078253,cg08187687,cg23650801,cg00336700,cg09346546	10	cg01658421,cg05467160,cg14715696,cg13264399,cg03182917,cg02274048,cg20398486,cg08187687,cg23650801,cg00336700
chr2	176948843	176951567	2	Yes	promoter	EVX2	No	12	cg21207266,cg17595353,cg01866606,cg10908460,cg09498652,cg17495715,cg26149275,cg08431899,cg21715488,cg07939836,cg14085358,cg24683680	10	cg21207266,cg10908460,cg09498652,cg17495715,cg26149275,cg08431899,cg21715488,cg07939836,cg14085358,cg24683680
chr2	176956174	176959725	2	Yes	promoter	HOXD13	No	15	cg24914355,cg09760956,cg18229422,cg00319168,cg07175883,cg04415176,cg00039441,cg08911275,cg21384645,cg11523712,cg05256269,cg19325985,cg10418524,cg07802350,cg21128569	15	cg24914355,cg09760956,cg18229422,cg00319168,cg07175883,cg04415176,cg00039441,cg27016163,cg08911275,cg21384645,cg11523712,cg05256269,cg19325985,cg07802350,cg21128569
chr2	176960863	176965515	2	Yes	promoter	HOXD12	No	25	cg03371669,cg03964958,cg23130254,cg02694427,cg11754318,cg12268637,cg03874199,cg18022224,cg01405040,cg06571387,cg20292112,cg06473181,cg17512364,cg12503267,cg00094359,cg12256309,cg14958154,cg04654153,cg17931890,cg27254442,cg16912150,cg08696866,cg18669966,cg13011362,cg24563197	25	cg03371669,cg03964958,cg23130254,cg02694427,cg11754318,cg12268637,cg03874199,cg18022224,cg17764514,cg01405040,cg06571387,cg20292112,cg17512364,cg12503267,cg00094359,cg12256309,cg14958154,cg04654153,cg17931890,cg27254442,cg16912150,cg08696866,cg18669966,cg13011362,cg24563197
chr2	176991506	176998488	2	Yes	promoter	HOXD8	No	25	cg21932416,cg13501907,cg07783843,cg08079908,cg01293179,cg10239098,cg15520279,cg24416513,cg15808943,cg03858756,cg11969556,cg14473102,cg19384289,cg17863912,cg20539752,cg02347773,cg21815667,cg20732478,cg09238180,cg14601868,cg23901857,cg25423004,cg03321133,cg18448949,cg00035316	30	cg21932416,cg13501907,cg07783843,cg08079908,cg01293179,cg10239098,cg15520279,cg23464101,cg11261698,cg26408914,cg24416513,cg15808943,cg03858756,cg11969556,cg14473102,cg05115332,cg17788418,cg19384289,cg17863912,cg20539752,cg02347773,cg21815667,cg20732478,cg09238180,cg23901857,cg25423004,cg03321133,cg18448949,cg00035316,cg02328579
chr2	177000046	177006228	2	Yes	promoter	HOXD-AS2,HOXD3	No	23	cg17278528,cg01477255,cg06617341,cg02877791,cg01970496,cg15054838,cg24058732,cg21818470,cg10858215,cg18516557,cg11375458,cg11248896,cg06896987,cg08182501,cg10503083,cg22171085,cg25820279,cg25984400,cg24154951,cg27215033,cg21319323,cg21235151,cg23345300	29	cg17278528,cg01477255,cg06617341,cg02877791,cg01970496,cg15054838,cg24058732,cg21818470,cg10858215,cg18516557,cg11375458,cg11248896,cg06896987,cg08182501,cg10503083,cg12721835,cg06011461,cg22171085,cg25820279,cg25984400,cg21493150,cg20090731,cg24154951,cg27215033,cg21319323,cg08505456,cg21235151,cg00874229,cg23345300
chr2	177035942	177037909	2	Yes	gene body	HOXD3	No	6	cg21902187,cg13053653,cg10159630,cg00278547,cg04316624,cg01171212	6	cg21902187,cg13053653,cg10159630,cg00278547,cg04316624,cg01171212
chr2	177038941	177040807	2	Yes	gene body	HOXD-AS1	No	7	cg10086659,cg23322546,cg18987335,cg19335437,cg12602409,cg13768137,cg10477905	6	cg10086659,cg23322546,cg18987335,cg12602409,cg13768137,cg10477905
chr2	177041954	177043953	2	Yes	promoter	AC009336.24,HOXD-AS1	No	7	cg25347419,cg10305451,cg13092806,cg09355771,cg03152288,cg14324370,cg03401519	9	cg25347419,cg10305451,cg13092806,cg09355771,cg10431880,cg03152288,cg14324370,cg03401519,cg12858336
chr2	177051601	177055307	2	Yes	promoter	HOXD-AS1,HOXD1	No	19	cg03553278,cg02466815,cg02746725,cg08809260,cg20676716,cg05871694,cg06697536,cg19001226,cg19180624,cg19542816,cg05099387,cg23420260,cg02150988,cg03450948,cg04003136,cg13044985,cg25185585,cg07797397,cg11418595	24	cg03553278,cg02466815,cg02746725,cg08809260,cg11101542,cg20676716,cg05871694,cg06697536,cg19001226,cg19180624,cg19542816,cg05099387,cg23420260,cg02150988,cg03450948,cg24386890,cg23157415,cg01923073,cg04003136,cg13044985,cg25185585,cg07797397,cg11418595,cg04248916
chr2	177354408	177356024	1	Yes	intergenic	NA	No	5	cg07484739,cg10039988,cg15303382,cg10456121,cg13295262	5	cg07484739,cg10039988,cg15303382,cg10456121,cg13295262
chr2	177418038	177419677	3	No	intergenic	NA	Yes	4	cg02284625,cg16982199,cg20923184,cg23561606	3	cg02284625,cg16982199,cg20923184
chr2	177501567	177503775	2	Yes	promoter	AC017048.3,AC017048.4	No	12	cg05509190,cg08474164,cg07077965,cg00215551,cg17839314,cg01366710,cg22696982,cg04739123,cg17397369,cg04637598,cg02077100,cg12148129	13	cg05509190,cg07077965,cg00215551,cg17839314,cg01366710,cg22696982,cg04739123,cg24665667,cg17397369,cg04637598,cg02077100,cg12148129,cg26791400
chr2	178012305	178014090	3	No	gene body	AC079305.11	No	4	cg13362540,cg25796631,cg26573733,cg04320629	4	cg13362540,cg25796631,cg26573733,cg04320629
chr2	178936652	178938647	3	Yes	promoter	PDE11A	No	10	cg22874858,cg06109949,cg21243919,cg08213337,cg10498524,cg23468897,cg12492094,cg06496261,cg25711575,cg02369725	10	cg14528964,cg06109949,cg21243919,cg08213337,cg10498524,cg23468897,cg12492094,cg06496261,cg25711575,cg02369725
chr2	179057786	179061256	1	Yes	promoter	OSBPL6	No	10	cg03915558,cg10917899,cg02034563,cg06376016,cg00778107,cg15776446,cg09266433,cg25828872,cg02078558,cg16136187	11	cg03915558,cg10917899,cg02034563,cg06376016,cg00778107,cg04892375,cg15776446,cg09266433,cg25828872,cg02078558,cg16136187
chr2	180724301	180727627	3	Yes	promoter	MIR1258,ZNF385B	Yes	15	cg05687686,cg00651020,cg14670435,cg16400999,cg06695611,cg09279240,cg26271891,cg11113760,cg24575676,cg22657780,cg10866755,cg01452873,cg13285968,cg16705245,cg19982471	17	cg01992936,cg07732626,cg05687686,cg00651020,cg14670435,cg16400999,cg06695611,cg09279240,cg11113760,cg24575676,cg22657780,cg10866755,cg01452873,cg13285968,cg16705245,cg19982471,cg14767203
chr2	182321008	182323486	3	Yes	promoter	ITGA4	No	13	cg04531425,cg11947981,cg16057262,cg25024074,cg21995919,cg06952671,cg10526659,cg20415809,cg25652029,cg10965575,cg17265419,cg25515269,cg05246303	16	cg19769411,cg16546006,cg04531425,cg11947981,cg16057262,cg25024074,cg21995919,cg06952671,cg10526659,cg20415809,cg25652029,cg23478302,cg25515269,cg05246303,cg14387854,cg25337141
chr2	182520246	182523426	3	Yes	promoter	CERKL	No	11	cg01494441,cg02019072,cg19768950,cg08065101,cg06499484,cg16851924,cg05113709,cg27166649,cg04590313,cg15824291,cg11911679	14	cg01494441,cg22020591,cg15441518,cg23873005,cg15839532,cg02019072,cg19768950,cg08065101,cg06499484,cg16851924,cg27166649,cg04590313,cg15824291,cg11911679
chr2	182544740	182546990	2	No	promoter	AC013733.3,CERKL,NEUROD1	No	11	cg03578473,cg20709008,cg01863682,cg09942248,cg03767531,cg19711579,cg08327269,cg06963053,cg22359606,cg01789478,cg01897496	14	cg11354681,cg03578473,cg20709008,cg01863682,cg02819605,cg09942248,cg03767531,cg19711579,cg08327269,cg06963053,cg22359606,cg01789478,cg17088751,cg25206687
chr2	182547199	182550739	2	Yes	promoter	AC013733.3	No	16	cg13435649,cg13848989,cg16904960,cg14975429,cg05928053,cg24548498,cg10596451,cg24275957,cg23030111,cg14573089,cg08302913,cg16650529,cg25929173,cg02582957,cg04299439,cg05785155	17	cg13435649,cg13848989,cg16904960,cg14975429,cg05928053,cg24548498,cg10596451,cg24275957,cg08302913,cg16650529,cg25929173,cg02582957,cg20817487,cg16423486,cg07958289,cg04299439,cg05785155
chr2	183728853	183733230	3	Yes	promoter	FRZB	No	14	cg04458969,cg07721625,cg04037038,cg07317641,cg20701689,cg06830784,cg03576419,cg19568591,cg14693391,cg20308679,cg09484039,cg01481989,cg26700716,cg02931467	13	cg04458969,cg07721625,cg05616069,cg26461375,cg04037038,cg07317641,cg20701689,cg06830784,cg03576419,cg19568591,cg14693391,cg20308679,cg01481989
chr2	185461418	185465175	3	Yes	promoter	ZNF804A	No	14	cg23241637,cg16573328,cg13536757,cg21245277,cg13107760,cg00554682,cg25783997,cg21739754,cg15577595,cg01968493,cg11811513,cg13121699,cg24166893,cg01715143	16	cg23241637,cg15512297,cg16573328,cg13536757,cg21245277,cg13107760,cg00554682,cg25783997,cg00271207,cg21739754,cg15577595,cg01968493,cg11811513,cg13121699,cg24166893,cg01715143
chr2	190444022	190447174	3	Yes	promoter	SLC40A1	No	12	cg04361126,cg14499385,cg14126583,cg11483915,cg21660960,cg09606941,cg13394305,cg15893070,cg11692477,cg19075346,cg10752008,cg01158447	13	cg04361126,cg11758995,cg14499385,cg14126583,cg11483915,cg21660960,cg09606941,cg13394305,cg15893070,cg11692477,cg19075346,cg10752008,cg01158447
chr2	191044305	191046619	3	Yes	promoter	C2orf88	No	12	cg22003435,cg19906093,cg15313226,cg11097717,cg14210694,cg02941781,cg06532037,cg08350814,cg11448068,cg10168635,cg05969591,cg04391205	15	cg22003435,cg19906093,cg15313226,cg11097717,cg14210694,cg17444495,cg02941781,cg06532037,cg08350814,cg04675986,cg04710629,cg11448068,cg10168635,cg13185953,cg04391205
chr2	191207329	191209847	3	Yes	promoter	INPP1	No	10	cg16691616,cg25110245,cg09351258,cg08286599,cg25753817,cg03345805,cg15635368,cg20016569,cg17516156,cg05963740	17	cg14147945,cg16691616,cg25110245,cg09351258,cg08286599,cg02090437,cg26723992,cg05871892,cg25753817,cg03345805,cg15635368,cg15283622,cg20016569,cg17516156,cg05963740,cg00416922,cg13289709
chr2	191271628	191274803	3	Yes	promoter	MFSD6	No	8	cg04343092,cg20614940,cg21644426,cg12616745,cg12419195,cg22162872,cg04892919,cg02598071	7	cg04343092,cg12616745,cg12419195,cg22162872,cg04892919,cg21933654,cg02598071
chr2	191514041	191516093	3	Yes	promoter	NAB1	No	3	cg26187876,cg06952117,cg12885476	2	cg26187876,cg06952117
chr2	192014604	192016595	3	No	promoter	STAT4	No	14	cg04285318,cg25428612,cg24331079,cg01004382,cg18155840,cg22356198,cg23609905,cg16473511,cg01453441,cg23791611,cg20195812,cg21100532,cg03265267,cg17287767	14	cg04285318,cg10210496,cg10943829,cg24331079,cg01004382,cg18155840,cg23609905,cg16473511,cg01453441,cg23791611,cg20195812,cg21100532,cg03265267,cg17287767
chr2	193057762	193062129	1	Yes	promoter	TMEFF2	No	10	cg00012126,cg15910001,cg02288301,cg03170056,cg01808545,cg06008912,cg06856528,cg18221862,cg19094243,cg09501959	14	cg00012126,cg15910001,cg02288301,cg09237843,cg03170056,cg24899822,cg01808545,cg06008912,cg06856528,cg18107367,cg18221862,cg19094243,cg09501959,cg11691408
chr2	197456171	197459465	1	Yes	promoter	HECW2	No	15	cg00402533,cg26537076,cg00510111,cg17107385,cg12644696,cg01381678,cg24613479,cg07853758,cg26094984,cg13869872,cg21597684,cg10794799,cg13821072,cg13308279,cg16616765	14	cg00402533,cg26537076,cg00510111,cg17107385,cg12644696,cg01381678,cg24613479,cg07853758,cg26094984,cg13869872,cg21597684,cg13821072,cg13308279,cg16616765
chr2	198173713	198176744	3	Yes	promoter	AC010746.3,ANKRD44	No	6	cg02578557,cg01141237,cg11480830,cg20885578,cg03934865,cg10820045	11	cg10189885,cg05230130,cg15289988,cg16082705,cg20307171,cg09657118,cg02578557,cg01141237,cg11480830,cg03934865,cg10820045
chr2	198650421	198652146	3	Yes	promoter	BOLL	No	10	cg16002818,cg00926400,cg24589459,cg17560332,cg07495363,cg13356896,cg05783139,cg03774803,cg10124201,cg07734961	17	cg25009743,cg24141882,cg16002818,cg00926400,cg20577027,cg24589459,cg17560332,cg13706908,cg17565627,cg07495363,cg02957700,cg13356896,cg05783139,cg21866259,cg03774803,cg10124201,cg07734961
chr2	198668502	198670920	3	Yes	promoter	PLCL1	No	10	cg26444995,cg22583333,cg00792783,cg00208931,cg09345954,cg03041508,cg19040667,cg12148775,cg06098283,cg19156104	12	cg26444995,cg22583333,cg00792783,cg00208931,cg09345954,cg19040667,cg13240869,cg12148775,cg06098283,cg19156104,cg04944900,cg27298848
chr2	200319693	200330254	3	Yes	promoter	SATB2,SATB2-AS1	Yes	37	cg00586817,cg27308895,cg22539420,cg04021372,cg10982364,cg05165940,cg17360781,cg07897690,cg15679665,cg12999636,cg01558212,cg07835424,cg23994043,cg20785796,cg03163783,cg10185119,cg26792080,cg17754171,cg05358815,cg03447810,cg01413546,cg10535353,cg03001463,cg23244253,cg26101402,cg25928603,cg08779779,cg21136715,cg26995744,cg07582470,cg06644373,cg17204275,cg21485895,cg22973789,cg07855083,cg27583307,cg0…	48	cg16439564,cg06199336,cg22845542,cg00586817,cg27352019,cg27308895,cg22539420,cg04021372,cg10982364,cg05165940,cg17360781,cg12960893,cg07897690,cg15679665,cg01558212,cg07835424,cg23994043,cg20785796,cg03163783,cg26831950,cg12938338,cg10185119,cg26792080,cg17754171,cg05358815,cg03447810,cg01413546,cg03001463,cg23244253,cg26101402,cg25928603,cg01651170,cg08779779,cg22489099,cg21136715,cg26995744,cg0…
chr2	200330576	200336947	2	Yes	promoter	SATB2,SATB2-AS1	No	26	cg18148653,cg06550057,cg00768993,cg22814961,cg10168149,cg25052456,cg25740565,cg07913197,cg23246703,cg06451843,cg09605636,cg15981734,cg24345062,cg16798252,cg19376851,cg27456468,cg08690859,cg03965648,cg00082770,cg07444473,cg27109600,cg24688655,cg08351100,cg03583016,cg09240763,cg09250678	34	cg13612316,cg21599020,cg06550057,cg24090090,cg19111296,cg18638206,cg00768993,cg22814961,cg10168149,cg25052456,cg25740565,cg07913197,cg23246703,cg06451843,cg09605636,cg15981734,cg24345062,cg16798252,cg19376851,cg27456468,cg08690859,cg25103650,cg22334352,cg14273610,cg03965648,cg00082770,cg17604404,cg07444473,cg27109600,cg24688655,cg08351100,cg03583016,cg02329011,cg09240763
chr2	200468202	200469416	3	Yes	intergenic	NA	Yes	5	cg15122439,cg20636352,cg11556846,cg01795955,cg03741458	6	cg15122439,cg20636352,cg11556846,cg01795955,cg08677579,cg03741458
chr2	200714634	200716447	3	Yes	promoter	FTCDNL1	No	7	cg00014285,cg01675229,cg07506744,cg13524161,cg22924838,cg13048645,cg03735916	10	cg00014285,cg01675229,cg07506744,cg13524161,cg09056799,cg22924838,cg22219902,cg00796711,cg13048645,cg03735916
chr2	205408947	205411776	3	Yes	promoter	PARD3B	No	12	cg25149218,cg03651957,cg15471177,cg10497884,cg25080322,cg06547404,cg23810348,cg02600940,cg17626178,cg04316564,cg15945407,cg14024209	13	cg25149218,cg03651957,cg15471177,cg10497884,cg19281957,cg06547404,cg23810348,cg02600940,cg17626178,cg04316564,cg15945407,cg14024209,cg10786047
chr2	206545905	206552887	1	Yes	promoter	NRP2	Yes	18	cg02183001,cg19795793,cg17455088,cg10648139,cg01323148,cg16114434,cg25292468,cg23038014,cg02185666,cg01154445,cg14163802,cg18371506,cg17809414,cg11793701,cg14150327,cg10118547,cg24319718,cg22367989	24	cg02183001,cg19795793,cg17455088,cg01323148,cg16114434,cg25292468,cg23038014,cg02185666,cg01154445,cg24900980,cg13923688,cg06967443,cg14163802,cg18371506,cg17809414,cg11793701,cg18351177,cg04023740,cg24319718,cg22367989,cg09745534,cg07861390,cg00698967,cg09114261
chr2	207308456	207310460	3	Yes	promoter	ADAM23	No	2	cg21823149,cg09553380	2	cg21823149,cg09553380
chr2	207506140	207507876	3	Yes	promoter	AC010731.4	No	11	cg12848065,cg25146557,cg22944499,cg21541833,cg17165841,cg12110911,cg08057136,cg20841047,cg25556453,cg23094961,cg01036351	13	cg18948399,cg12848065,cg25146557,cg22944499,cg21541833,cg11346003,cg17165841,cg12110911,cg08057136,cg20841047,cg25556453,cg23094961,cg01036351
chr2	209270775	209272731	3	Yes	promoter	PTH2R	No	10	cg22680399,cg06562306,cg06951245,cg24769821,cg06391199,cg25057743,cg23524735,cg01288372,cg21302622,cg25881038	10	cg22680399,cg06951245,cg06391199,cg25057743,cg23524735,cg21302622,cg18874715,cg25881038,cg01284406,cg18532854
chr2	210288676	210290861	3	Yes	promoter	MAP2	No	5	cg22036003,cg24753473,cg00050984,cg08843538,cg18704768	6	cg22036003,cg24753473,cg00050984,cg08843538,cg27066113,cg18704768
chr2	211088931	211091162	3	Yes	promoter	ACADL	No	10	cg07308161,cg16316649,cg06062084,cg19427188,cg21933859,cg09308336,cg09068528,cg04529066,cg14795968,cg00289546	11	cg24637361,cg07308161,cg16316649,cg06062084,cg19427188,cg21933859,cg09308336,cg09068528,cg04529066,cg14795968,cg00289546
chr2	213400308	213404770	2	Yes	promoter	ERBB4	Yes	19	cg20637307,cg16329650,cg00011346,cg00639289,cg27236875,cg19079194,cg07015629,cg25798409,cg08042975,cg24768649,cg21463740,cg22795590,cg07536926,cg00326719,cg12281565,cg11058366,cg20215622,cg26294431,cg01965462	25	cg20637307,cg16329650,cg00011346,cg00639289,cg13920232,cg06149408,cg08649550,cg19011683,cg27236875,cg22623159,cg08870194,cg19079194,cg00787188,cg03822365,cg07015629,cg08042975,cg24768649,cg21463740,cg22795590,cg07536926,cg00326719,cg11058366,cg20215622,cg26294431,cg01965462
chr2	217234862	217238168	3	Yes	promoter	MARCH4	No	16	cg03106056,cg25385733,cg09410607,cg14556303,cg01380906,cg14435444,cg00833448,cg25183282,cg05965414,cg13492070,cg07065054,cg08917174,cg04749646,cg16638523,cg02543075,cg19492047	16	cg03106056,cg25385733,cg09410607,cg14556303,cg01380906,cg14435444,cg00833448,cg25183282,cg05965414,cg13492070,cg07065054,cg08917174,cg04749646,cg16638523,cg02543075,cg19492047
chr2	217470905	217472225	3	No	promoter	AC073321.3	No	3	cg24745816,cg11469308,cg22350212	5	cg09162385,cg24745816,cg11469308,cg05008135,cg22350212
chr2	217554974	217561142	3	Yes	promoter	AC007563.5,IGFBP5	Yes	21	cg00011856,cg20952768,cg21032628,cg19008649,cg20419545,cg19675223,cg22467567,cg21875423,cg06160809,cg09924165,cg00590670,cg09462445,cg03222971,cg18807929,cg00715925,cg13448906,cg14575484,cg10165071,cg19851242,cg26724497,cg05903386	22	cg00011856,cg22522886,cg20952768,cg21032628,cg19008649,cg20419545,cg19675223,cg21875423,cg06160809,cg09924165,cg00590670,cg25408991,cg09462445,cg03222971,cg18807929,cg00715925,cg13448906,cg14575484,cg10165071,cg19851242,cg26724497,cg05903386
chr2	218842570	218844848	3	Yes	promoter	AC010136.2	Yes	6	cg04316429,cg05783384,cg07616871,cg20225999,cg01089914,cg00786685	9	cg04316429,cg05783384,cg07616871,cg20225999,cg23262459,cg13711385,cg01089914,cg19374905,cg00786685
chr2	218873732	218876566	3	Yes	intergenic	NA	No	4	cg03347671,cg24932305,cg00412534,cg03877506	4	cg03347671,cg24932305,cg00412534,cg03877506
chr2	218898157	218899904	3	Yes	intergenic	NA	No	6	cg12909337,cg26669270,cg23940612,cg03832522,cg12924402,cg00122854	6	cg12909337,cg26669270,cg23940612,cg03832522,cg12924402,cg00122854
chr2	219251434	219253419	1	Yes	gene body	SLC11A1	No	5	cg03710889,cg04656051,cg14645545,cg03291396,cg04337188	5	cg03710889,cg04656051,cg14645545,cg03291396,cg04337188
chr2	219260825	219264783	2	Yes	promoter	CTDSP1,RP11-378A13.2	No	16	cg02675502,cg23889021,cg00330502,cg24193314,cg10887392,cg17941846,cg03995228,cg13967646,cg18853435,cg12546562,cg19731602,cg05190002,cg14450238,cg24007161,cg01379701,cg23158663	23	cg02675502,cg23889021,cg00330502,cg15631290,cg24193314,cg10887392,cg17941846,cg03995228,cg12608505,cg13967646,cg11932445,cg18853435,cg12546562,cg20809991,cg22558428,cg17168828,cg19731602,cg14450238,cg22401197,cg24007161,cg01379701,cg23158663,cg15544439
chr2	219645743	219649245	3	Yes	promoter	CYP27A1	Yes	9	cg21459645,cg26104932,cg26175971,cg20601919,cg14553243,cg10147666,cg01872077,cg03460682,cg22707705	14	cg21459645,cg16605823,cg26104932,cg26175971,cg14553243,cg10147666,cg21612644,cg01872077,cg08111152,cg22811307,cg03460682,cg25480102,cg22707705,cg17774679
chr2	219723185	219726435	2	Yes	promoter	WNT6	No	11	cg11511777,cg05420495,cg15074329,cg22156632,cg11175192,cg02175741,cg06157334,cg07714657,cg10000424,cg16256504,cg05985303	13	cg11511777,cg05420495,cg15074329,cg11175192,cg02175741,cg06157334,cg21838310,cg07714657,cg10000424,cg16256504,cg04201521,cg05985303,cg04289797
chr2	219756718	219758486	2	Yes	gene body	WNT10A	No	6	cg00155423,cg22125838,cg26146971,cg23665973,cg23937893,cg04067066	7	cg00155423,cg22125838,cg07482761,cg26146971,cg23665973,cg23937893,cg04067066
chr2	219823151	219826964	2	Yes	promoter	AC097468.7,CDK5R2	No	20	cg27638196,cg03164275,cg10116864,cg02614660,cg08724891,cg12156672,cg16652741,cg16831573,cg04778271,cg01920829,cg15442811,cg26682866,cg14910495,cg16531271,cg14831838,cg14941457,cg14002622,cg19451845,cg03112382,cg23452259	23	cg27638196,cg03164275,cg26723378,cg10116864,cg02614660,cg08724891,cg12156672,cg03369089,cg16652741,cg16831573,cg04778271,cg01920829,cg15442811,cg26682866,cg14910495,cg16531271,cg19334934,cg14831838,cg14941457,cg14002622,cg19451845,cg03112382,cg23452259
chr2	219844193	219847907	2	Yes	gene body	FEV,LINC00608	Yes	9	cg00260634,cg23108709,cg26830038,cg05402599,cg00082219,cg05997941,cg07590609,cg21295476,cg06921464	9	cg00260634,cg23108709,cg26830038,cg05402599,cg00082219,cg05997941,cg07590609,cg21295476,cg06921464
chr2	219848223	219851106	2	Yes	promoter	FEV	No	13	cg24178740,cg11269533,cg09035284,cg18367751,cg24562066,cg01157126,cg15138883,cg23837867,cg17608490,cg16303918,cg00021256,cg00422120,cg07565472	13	cg12186652,cg24178740,cg11269533,cg09035284,cg18367751,cg24562066,cg01157126,cg15138883,cg23837867,cg17608490,cg16303918,cg00021256,cg00422120
chr2	219863813	219868583	2	Yes	promoter	AC097468.4,MIR375	No	16	cg27139836,cg26394220,cg01822124,cg02257674,cg06214770,cg04348419,cg14358282,cg21615583,cg00705280,cg00218620,cg00215432,cg22306928,cg23022574,cg23101776,cg00132972,cg25520960	17	cg27139836,cg26394220,cg18854412,cg01822124,cg02257674,cg04348419,cg13723257,cg05787409,cg14358282,cg21615583,cg00705280,cg00218620,cg00215432,cg22306928,cg23022574,cg23101776,cg25520960
chr2	219921796	219926525	2	Yes	promoter	IHH,MIR3131	No	19	cg11348293,cg01267262,cg01821967,cg14692768,cg08261878,cg03292754,cg07045816,cg08957652,cg12565637,cg17178336,cg25908985,cg25034205,cg09617556,cg09297636,cg05499944,cg05715532,cg25297849,cg18042229,cg03820828	20	cg23933193,cg11348293,cg01267262,cg14692768,cg08261878,cg03292754,cg07045816,cg08957652,cg12565637,cg17178336,cg25908985,cg25034205,cg09617556,cg12981188,cg09297636,cg05499944,cg05715532,cg25297849,cg02886023,cg18042229
chr2	220116612	220119829	1	Yes	promoter	TUBA4A,TUBA4B	No	18	cg22385231,cg22129906,cg18013012,cg09197965,cg00496455,cg01732804,cg12309957,cg02315249,cg00476358,cg23369371,cg01693157,cg08640923,cg23108728,cg19074496,cg11348442,cg16725050,cg08378442,cg08396863	24	cg13552372,cg13409952,cg22845754,cg22385231,cg03253255,cg23977332,cg22129906,cg18013012,cg09197965,cg21332408,cg00496455,cg12309957,cg02315249,cg00476358,cg23369371,cg01693157,cg08640923,cg23108728,cg19074496,cg11348442,cg16725050,cg08378442,cg08396863,cg24352985
chr2	220172585	220174987	3	Yes	promoter	PTPRN	No	10	cg02183561,cg07623221,cg20671534,cg01382864,cg03970036,cg10140638,cg16166796,cg06971096,cg20176194,cg03545227	15	cg02183561,cg07454091,cg07623221,cg20671534,cg19663999,cg15119274,cg04422168,cg01382864,cg03970036,cg10140638,cg16166796,cg25516529,cg06971096,cg20176194,cg03545227
chr2	220196174	220197858	3	Yes	promoter	RESP18	No	8	cg00436969,cg14987769,cg13773083,cg21402265,cg13321077,cg22400015,cg05155043,cg05864140	8	cg00436969,cg14891200,cg14987769,cg02255488,cg13773083,cg13321077,cg22400015,cg05864140
chr2	220222494	220224269	3	Yes	intergenic	NA	No	7	cg20155920,cg03954411,cg13924432,cg13622261,cg09059267,cg12653917,cg07434457	7	cg20155920,cg03954411,cg13924432,cg13622261,cg09059267,cg12653917,cg07434457
chr2	220305413	220307844	3	Yes	promoter	SPEG	No	8	cg03906033,cg10177207,cg02767202,cg21347733,cg04323979,cg25423755,cg26539941,cg03394909	9	cg03906033,cg10177207,cg02767202,cg21347733,cg04323979,cg25423755,cg26539941,cg03394909,cg26301849
chr2	220348509	220350224	2	Yes	gene body	AC053503.11,SPEG	No	7	cg02487130,cg00803453,cg02869459,cg15415787,cg00495988,cg11841522,cg18131810	8	cg02487130,cg00803453,cg02869459,cg06582371,cg15415787,cg00495988,cg11841522,cg18131810
chr2	220360927	220363553	2	Yes	promoter	GMPPA,RP11-316O14.1	No	12	cg15195538,cg02018802,cg17765291,cg19930135,cg03267697,cg10020325,cg12458485,cg11104474,cg08801795,cg16918905,cg11361344,cg02549182	18	cg12279494,cg02620538,cg14719294,cg20068365,cg15195538,cg02018802,cg17765291,cg19930135,cg03267697,cg10020325,cg12458485,cg11104474,cg08801795,cg16918905,cg11361344,cg05076576,cg02549182,cg08669973
chr2	220415557	220418506	1	Yes	gene body	OBSL1	No	7	cg22212691,cg13782090,cg11531021,cg02527669,cg15021439,cg14535068,cg16507172	8	cg22212691,cg13782090,cg23783117,cg11531021,cg02527669,cg15021439,cg14535068,cg16507172
chr2	222433068	222439592	1	Yes	promoter	CTD-2308L22.1,EPHA4	Yes	23	cg08089542,cg24703390,cg02431065,cg27132396,cg00081574,cg15808558,cg08625382,cg26538529,cg05499262,cg08728892,cg25272554,cg23317907,cg24372550,cg08965464,cg03776464,cg17846785,cg10517814,cg13231700,cg01446950,cg05736236,cg00692780,cg16786808,cg18527574	25	cg24703390,cg10656888,cg26186177,cg02431065,cg27132396,cg00081574,cg08590564,cg15808558,cg08625382,cg26538529,cg05499262,cg08728892,cg25272554,cg23317907,cg24372550,cg08965464,cg03776464,cg17846785,cg10517814,cg13231700,cg01446950,cg05736236,cg00692780,cg16786808,cg18527574
chr2	222889610	222891643	3	No	intergenic	NA	Yes	1	cg07792345	2	cg07792345,cg08068845
chr2	223153524	223157541	2	Yes	gene body	PAX3	Yes	10	cg04407305,cg25809290,cg15775921,cg16563171,cg02347074,cg11454719,cg15889391,cg22989843,cg23077820,cg04688351	10	cg04407305,cg25809290,cg15775921,cg16563171,cg02347074,cg11454719,cg15889391,cg22989843,cg23077820,cg04688351
chr2	223158234	223167839	2	Yes	promoter	CCDC140,PAX3	No	49	cg13485564,cg19476053,cg00790098,cg20923619,cg03539789,cg10269365,cg08697503,cg19102771,cg16325502,cg12597169,cg10757065,cg14064356,cg02710571,cg10035294,cg19352038,cg18077971,cg16529477,cg27480727,cg13496838,cg10544031,cg01954737,cg09424526,cg15133719,cg20584905,cg15703632,cg15608397,cg14265823,cg20969194,cg23546474,cg06916239,cg25596297,cg13767755,cg10416206,cg01790894,cg14093610,cg08022524,cg0…	51	cg13485564,cg19476053,cg00790098,cg20923619,cg03539789,cg10269365,cg08697503,cg19102771,cg16325502,cg12597169,cg10757065,cg14064356,cg02710571,cg10035294,cg19352038,cg18077971,cg16529477,cg13496838,cg10544031,cg01954737,cg09424526,cg15133719,cg16692317,cg20584905,cg15703632,cg20372045,cg18352427,cg02518887,cg24261911,cg15608397,cg14265823,cg20969194,cg23546474,cg06916239,cg13767755,cg01557550,cg1…
chr2	223169176	223172587	2	Yes	gene body	CCDC140	Yes	15	cg24419324,cg10138970,cg13908336,cg02998620,cg06619766,cg18111139,cg24166694,cg23177772,cg12122034,cg07963990,cg01841641,cg09486778,cg15825116,cg02224980,cg00699392	15	cg24419324,cg10138970,cg13908336,cg02998620,cg06619766,cg18111139,cg24166694,cg23177772,cg12122034,cg07963990,cg01841641,cg09486778,cg15825116,cg02224980,cg00699392
chr2	223182262	223186349	2	Yes	promoter	AC010980.2,RP11-384O8.1	No	9	cg19375530,cg24748867,cg18204584,cg10517014,cg27506462,cg16975959,cg04309212,cg00831233,cg06644403	20	cg19375530,cg03190371,cg15595588,cg22809407,cg15806809,cg10477345,cg07875261,cg24748867,cg19575807,cg18204584,cg10517014,cg27506462,cg16975959,cg04309212,cg00831233,cg04615512,cg23817281,cg06644403,cg08692023,cg16151541
chr2	223287853	223290752	2	Yes	promoter	SGPP2	No	15	cg16171484,cg19416417,cg16764274,cg19519964,cg16884042,cg12145080,cg07357987,cg00043095,cg20598560,cg23604012,cg03182958,cg14435109,cg11300809,cg07873848,cg10091265	12	cg16171484,cg19416417,cg16764274,cg16884042,cg12145080,cg07357987,cg00043095,cg03182958,cg11300809,cg07873848,cg10091265,cg16968897
chr2	223535425	223537642	1	Yes	promoter	MOGAT1	No	8	cg26386610,cg14334298,cg05172912,cg16598292,cg06857614,cg21430539,cg12678667,cg22891868	9	cg26386610,cg14334298,cg08301633,cg05172912,cg17560493,cg16598292,cg12678667,cg22891868,cg24490326
chr2	224477243	224478699	3	No	intergenic	NA	Yes	3	cg21873251,cg05495011,cg21558038	5	cg09593947,cg21873251,cg05495011,cg21558038,cg02757668
chr2	225905573	225908230	2	Yes	promoter	DOCK10	Yes	8	cg02441556,cg00358213,cg11249313,cg16303846,cg07923325,cg01636561,cg04318855,cg22640209	10	cg02441556,cg19407684,cg00358213,cg11249313,cg16303846,cg07923325,cg00516289,cg01636561,cg04318855,cg22640209
chr2	228027701	228030379	3	Yes	promoter	COL4A3,COL4A4	No	14	cg19865525,cg16640096,cg11797365,cg22388982,cg22752008,cg06002370,cg22994281,cg13951042,cg23045258,cg26685735,cg10563352,cg04324308,cg08280392,cg01297370	17	cg16628206,cg19865525,cg16640096,cg11797365,cg22388982,cg06002370,cg22994281,cg00835345,cg13951042,cg23045258,cg18469473,cg11162396,cg26685735,cg10563352,cg04324308,cg08280392,cg01297370
chr2	229044256	229047265	3	Yes	promoter	SPHKAP	Yes	10	cg00423153,cg19269666,cg10959353,cg06092815,cg04072323,cg12525474,cg24333629,cg22190437,cg01820539,cg12001304	15	cg14378970,cg09848434,cg00423153,cg19269666,cg10959353,cg19168659,cg07578826,cg23163333,cg06092815,cg04072323,cg12525474,cg24333629,cg22190437,cg01820539,cg12001304
chr2	230134664	230136899	3	Yes	promoter	PID1	No	9	cg06064269,cg02799466,cg12671082,cg21949333,cg07472438,cg14165051,cg26112014,cg05471730,cg04743872	9	cg26777793,cg06064269,cg02799466,cg12671082,cg21949333,cg07472438,cg14165051,cg26112014,cg04743872
chr2	230577584	230580919	3	Yes	promoter	DNER	No	12	cg04166544,cg00980051,cg11928730,cg14965722,cg06522946,cg17145587,cg16365799,cg20755820,cg25301406,cg18714498,cg10034890,cg22200330	12	cg04166544,cg23635168,cg22919228,cg14965722,cg06522946,cg17145587,cg16365799,cg20755820,cg25301406,cg18714498,cg10034890,cg22200330
chr2	230931557	230934195	1	Yes	promoter	SLC16A14	No	11	cg25621735,cg01172899,cg13062396,cg07490650,cg16273133,cg03705718,cg26338195,cg22945872,cg00455164,cg24704015,cg02821501	14	cg25621735,cg01172899,cg23436391,cg27288272,cg13062396,cg07490650,cg16273133,cg03705718,cg26338195,cg22945872,cg08873675,cg00455164,cg24704015,cg02821501
chr2	231275695	231277493	3	No	intergenic	NA	Yes	6	cg06826886,cg16584342,cg08007990,cg21245287,cg08192414,cg04659582	6	cg06826886,cg16584342,cg08007990,cg21245287,cg08192414,cg04659582
chr2	231821407	231823024	3	No	gene body	GPR55	Yes	2	cg06683177,cg01012669	2	cg06683177,cg01012669
chr2	231901601	231904021	3	Yes	promoter	C2orf72	No	6	cg12852187,cg08210322,cg25848398,cg01956624,cg20722129,cg13909669	5	cg12852187,cg08210322,cg25848398,cg01956624,cg20722129
chr2	231916865	231918322	3	Yes	promoter	RP11-223I10.1	No	6	cg21047583,cg00914626,cg02448335,cg13824271,cg14659771,cg14731570	4	cg00914626,cg02448335,cg14659771,cg14731570
chr2	232789344	232792539	1	Yes	promoter	NPPC	No	16	cg16530165,cg08765991,cg22708248,cg07935340,cg07108206,cg02058731,cg07797231,cg23994917,cg26708548,cg26546557,cg19969873,cg15645220,cg23127249,cg14254918,cg18330611,cg19845136	18	cg16530165,cg08765991,cg07935340,cg07108206,cg02058731,cg07797231,cg02384486,cg24267344,cg23994917,cg26708548,cg26546557,cg26958076,cg19969873,cg15645220,cg23127249,cg14254918,cg18330611,cg19845136
chr2	233282184	233289368	1	Yes	promoter	AC068134.6	Yes	17	cg05228564,cg14418609,cg13598516,cg02113173,cg10313410,cg01072057,cg24996179,cg11702639,cg13193840,cg01940273,cg21566642,cg05951221,cg06644428,cg12250513,cg03329539,cg17087741,cg06264882	19	cg05228564,cg14418609,cg13598516,cg02113173,cg10313410,cg25957688,cg22812571,cg16841366,cg01072057,cg24996179,cg11702639,cg13193840,cg01940273,cg21566642,cg06644428,cg12250513,cg03329539,cg17087741,cg06264882
chr2	233349868	233353528	2	Yes	promoter	ECEL1	Yes	13	cg02932167,cg25431974,cg15986413,cg04593426,cg01228134,cg27023555,cg09736968,cg07503630,cg19047707,cg25317941,cg01856162,cg26525127,cg01869243	16	cg05402424,cg02932167,cg25431974,cg15986413,cg03422579,cg04593426,cg01228134,cg27023555,cg09736968,cg07503630,cg00949869,cg19047707,cg03945693,cg01856162,cg26525127,cg01869243
chr2	233366557	233369156	3	Yes	intergenic	NA	Yes	6	cg14192401,cg18988685,cg05137450,cg20729301,cg25962569,cg03434262	5	cg14192401,cg18988685,cg05137450,cg20729301,cg03434262
chr2	233387689	233389614	2	Yes	gene body	PRSS56	No	4	cg19579058,cg00051546,cg04150516,cg13805654	5	cg12344964,cg11641416,cg19579058,cg00051546,cg13805654
chr2	233496925	233500270	2	Yes	promoter	EFHD1	Yes	15	cg24936500,cg06842071,cg05020252,cg02806452,cg10625533,cg23645199,cg06749592,cg12804441,cg23904854,cg12500976,cg22106401,cg05364026,cg26148236,cg04143750,cg12118465	21	cg24936500,cg06842071,cg05020252,cg02806452,cg07364577,cg10625533,cg23645199,cg09966017,cg06749592,cg12804441,cg04242808,cg23904854,cg12500976,cg22106401,cg05364026,cg26148236,cg09536738,cg08507030,cg04143750,cg12118465,cg17021917
chr2	233740116	233742464	3	Yes	promoter	C2orf82	No	5	cg13759905,cg14345131,cg18572413,cg05709124,cg06283342	7	cg13759905,cg14345131,cg18572413,cg05709124,cg09169514,cg20023660,cg16085350
chr2	233790936	233794507	2	Yes	promoter	NGEF	No	9	cg07363307,cg02941741,cg13252401,cg06828015,cg27604702,cg05657618,cg08165971,cg11972305,cg13862851	7	cg07363307,cg02941741,cg06828015,cg27604702,cg05657618,cg08165971,cg11972305
chr2	234263423	234264958	3	No	promoter	AC019221.4,DGKD	No	2	cg06191495,cg01230160	2	cg06191495,cg01230160
chr2	235402990	235405503	3	Yes	promoter	ARL4C	No	6	cg04942334,cg21460828,cg21650900,cg11509907,cg15016771,cg05204104	8	cg04942334,cg23965099,cg26207141,cg21460828,cg21650900,cg11509907,cg15016771,cg05204104
chr2	235858954	235860383	3	Yes	promoter	SH3BP4	No	5	cg14061619,cg12214003,cg27024844,cg08036121,cg13904006	4	cg14061619,cg12214003,cg27024844,cg13904006
chr2	236403124	236405302	3	Yes	promoter	AGAP1	Yes	3	cg09317899,cg07708198,cg04730665	4	cg21664983,cg09317899,cg07708198,cg04730665
chr2	236578453	236580964	3	Yes	promoter	AGAP1	No	7	cg11905061,cg23922520,cg04188555,cg12436738,cg03451670,cg27076454,cg10112407	6	cg11905061,cg23922520,cg04188555,cg12436738,cg03451670,cg10112407
chr2	237071588	237084312	2	Yes	promoter	AC079135.1,GBX2	Yes	48	cg26820636,cg17530231,cg25335557,cg05100419,cg19215671,cg03231647,cg21019043,cg00302494,cg08084860,cg08058544,cg17287026,cg15706936,cg24812442,cg02106377,cg19753675,cg00051154,cg07014673,cg06546806,cg00147462,cg01270424,cg11612786,cg17171215,cg21165221,cg09681167,cg19714279,cg23095584,cg09302895,cg08767286,cg15765724,cg19761848,cg21426003,cg16023545,cg06954481,cg19052355,cg20804191,cg13895867,cg0…	47	cg26820636,cg05100419,cg19215671,cg03231647,cg21019043,cg00302494,cg08084860,cg08058544,cg15706936,cg24812442,cg19753675,cg00051154,cg07014673,cg06546806,cg00147462,cg01270424,cg11612786,cg17171215,cg21165221,cg19714279,cg23095584,cg08767286,cg15765724,cg00551389,cg01973124,cg14532827,cg19761848,cg21426003,cg16023545,cg06954481,cg19052355,cg13895867,cg18052020,cg06155356,cg09297288,cg21048930,cg0…
chr2	237086129	237089719	3	Yes	gene body	AC079135.1	Yes	12	cg08640046,cg08263571,cg15864834,cg06760518,cg17536603,cg12727398,cg18065680,cg23526973,cg14301932,cg15973314,cg25537434,cg09140778	12	cg10014798,cg08640046,cg08263571,cg15864834,cg06760518,cg17536603,cg12727398,cg23526973,cg14301932,cg15973314,cg25537434,cg09140778
chr2	237144870	237147178	3	Yes	gene body	AC079135.1,ASB18	No	7	cg10244525,cg02367144,cg26422059,cg21998638,cg19771465,cg19324714,cg05376617	7	cg10244525,cg02367144,cg26422059,cg21998638,cg19771465,cg19324714,cg05376617
chr2	237475732	237480532	3	Yes	promoter	ACKR3	No	11	cg26960322,cg03626672,cg00594866,cg22393213,cg27367871,cg18694780,cg07007118,cg12463851,cg12088387,cg16844875,cg15650509	15	cg26960322,cg03626672,cg00594866,cg22393213,cg12415575,cg19058526,cg20195763,cg27367871,cg18694780,cg07007118,cg12463851,cg26358225,cg12088387,cg16844875,cg15650509
chr2	238394432	238396940	3	Yes	promoter	MLPH	No	9	cg16426459,cg11692852,cg05240479,cg24603464,cg08992911,cg03076319,cg01387102,cg17187163,cg14070755	14	cg16426459,cg11692852,cg05240479,cg24603464,cg01504215,cg08992911,cg03076319,cg27130721,cg04476152,cg21999589,cg25895922,cg01387102,cg17187163,cg14070755
chr2	238534823	238537990	3	Yes	promoter	LRRFIP1	No	12	cg26569295,cg12914965,cg20993114,cg17815538,cg24656153,cg19442696,cg06289479,cg07797518,cg02367660,cg15674193,cg26271045,cg21532103	12	cg26569295,cg12914965,cg17815538,cg24656153,cg19442696,cg06289479,cg07797518,cg02367660,cg15674193,cg26271045,cg20793359,cg21532103
chr2	238600907	238603719	3	Yes	promoter	LRRFIP1	No	3	cg20732367,cg16787624,cg06044463	4	cg16630940,cg20732367,cg16787624,cg06044463
chr2	238767057	238769465	3	Yes	promoter	RAMP1	No	11	cg09861583,cg04365102,cg17845266,cg03270167,cg20986875,cg27418586,cg27567335,cg03647559,cg14849262,cg25485435,cg17794788	17	cg09861583,cg05024003,cg04365102,cg17845266,cg03270167,cg20986875,cg26419421,cg27418586,cg27567335,cg03647559,cg14849262,cg11927114,cg24406217,cg25485435,cg17794788,cg15571646,cg08939787
chr2	239066324	239068659	3	Yes	promoter	FAM132B	No	4	cg01477179,cg23282051,cg25875316,cg01090821	8	cg01477179,cg13455672,cg23282051,cg11592619,cg05077354,cg25875316,cg12243570,cg01090821
chr2	239139244	239140832	3	Yes	promoter	AC016757.3,AC096574.4	No	16	cg08209614,cg02135859,cg06497612,cg24079051,cg24534135,cg12608247,cg04166618,cg06732439,cg21272465,cg13530938,cg23497383,cg07323141,cg11904906,cg13957874,cg06102419,cg02536451	15	cg08209614,cg02135859,cg06497612,cg24079051,cg24534135,cg12608247,cg04166618,cg06732439,cg13530938,cg23497383,cg07323141,cg11904906,cg13957874,cg06102419,cg02536451
chr2	239195913	239197224	1	Yes	promoter	PER2	No	3	cg24831107,cg23905308,cg08202720	3	cg24831107,cg23905308,cg08202720
chr2	239754487	239759107	2	Yes	promoter	TWIST2	Yes	5	cg12440105,cg06738242,cg04840356,cg10966876,cg26913248	7	cg12440105,cg13518883,cg06738242,cg04840356,cg10966876,cg26913248,cg01349037
chr2	241034321	241036291	3	No	intergenic	NA	No	3	cg15393498,cg19934735,cg18663033	3	cg15393498,cg19934735,cg18663033
chr2	241375205	241376907	3	Yes	promoter	GPC1	No	2	cg14943749,cg08748373	2	cg14943749,cg08748373
chr2	241392192	241397325	3	Yes	promoter	AC110619.2,MIR149	Yes	13	cg15700022,cg15144453,cg12561497,cg24133207,cg06591185,cg17367832,cg13232118,cg11574092,cg01712737,cg13414834,cg06900899,cg14878988,cg27621528	15	cg09933745,cg23196692,cg27263634,cg15700022,cg15144453,cg12561497,cg24133207,cg06591185,cg17367832,cg13232118,cg11574092,cg01712737,cg13414834,cg14878988,cg27621528
chr2	241458852	241460567	3	Yes	gene body	ANKMY1	No	8	cg03743720,cg16909733,cg06476685,cg08276645,cg08461339,cg24539848,cg24086040,cg05371791	7	cg03743720,cg16909733,cg08276645,cg08461339,cg24539848,cg24086040,cg05371791
chr2	241505832	241509399	3	Yes	promoter	RNPEPL1	No	12	cg00497251,cg18795575,cg04466246,cg02321192,cg10334916,cg07072507,cg17422427,cg06970690,cg03050663,cg23100863,cg07212969,cg05371711	14	cg00497251,cg18795575,cg04466246,cg02321192,cg10334916,cg07072507,cg17422427,cg18160616,cg06970690,cg09085602,cg03050663,cg23100863,cg07212969,cg05371711
chr2	241855124	241856615	3	Yes	intergenic	NA	Yes	5	cg14396008,cg22367310,cg06546066,cg26800771,cg17414101	5	cg14396008,cg22367310,cg06546066,cg26800771,cg17414101
chr2	241937762	241939394	3	Yes	promoter	SNED1	No	9	cg20363891,cg08233654,cg21384492,cg10652091,cg15133301,cg05078238,cg27472905,cg11769456,cg15550398	7	cg20363891,cg08233654,cg15133301,cg05078238,cg27472905,cg11769456,cg15550398
chr2	241975500	241976932	3	Yes	gene body	AC005237.4,SNED1	No	5	cg07644939,cg10717312,cg26718213,cg22635676,cg26707709	6	cg07644939,cg13178916,cg10717312,cg26718213,cg22635676,cg26707709
chr2	242448239	242449417	1	Yes	promoter	STK25	No	4	cg08129953,cg21144270,cg22193247,cg01248010	12	cg24655066,cg05758480,cg26570680,cg26679055,cg18997635,cg22119921,cg22068494,cg18256192,cg08129953,cg21144270,cg22193247,cg01248010
chr2	242479853	242482030	3	Yes	intergenic	NA	Yes	7	cg19797930,cg27088072,cg12908899,cg04255879,cg11274314,cg02747319,cg13220917	6	cg19797930,cg12908899,cg04255879,cg11274314,cg02747319,cg13220917
chr2	242742561	242744769	3	Yes	gene body	GAL3ST2	No	6	cg18917517,cg15909951,cg15346191,cg06402816,cg03462699,cg03584389	5	cg18917517,cg15909951,cg15346191,cg06402816,cg03462699
chr3	237670	240588	3	Yes	promoter	CHL1,CHL1-AS2	No	16	cg11163933,cg03940684,cg10603275,cg19505136,cg04748834,cg21145524,cg18277764,cg24307799,cg12065366,cg07746943,cg08421685,cg25482786,cg01295518,cg04001014,cg00903242,cg11165881	25	cg11163933,cg03940684,cg10603275,cg19505136,cg04748834,cg09861201,cg21145524,cg18277764,cg17018976,cg24307799,cg12065366,cg07746943,cg08421685,cg25482786,cg01295518,cg04001014,cg25852422,cg02055799,cg22781352,cg00903242,cg00891836,cg10513594,cg11165881,cg07171710,cg09032066
chr3	2139142	2142413	2	Yes	promoter	CNTN4	Yes	15	cg10503138,cg09436171,cg11563860,cg21425099,cg27264249,cg18723341,cg05596265,cg10967350,cg00912625,cg06598836,cg04222358,cg26763727,cg18657094,cg24873464,cg08857159	15	cg09436171,cg11563860,cg21425099,cg27264249,cg18723341,cg05596265,cg10967350,cg00912625,cg06598836,cg04222358,cg26763727,cg18657094,cg24873464,cg12459037,cg08857159
chr3	4535077	4536974	1	Yes	promoter	ITPR1,ITPR1-AS1	No	3	cg03830585,cg21024916,cg06716686	2	cg21024916,cg06716686
chr3	4909061	4911157	3	Yes	gene body	AC018816.3	Yes	5	cg01832712,cg11926537,cg02388709,cg03149814,cg26394916	6	cg19746307,cg01832712,cg02388709,cg03149814,cg26394916,cg16866179
chr3	5017907	5020759	3	Yes	promoter	BHLHE40,BHLHE40-AS1	No	11	cg14508890,cg21223075,cg14814876,cg18985891,cg18113084,cg17202781,cg18810342,cg14766620,cg19450479,cg23480985,cg00401691	12	cg14508890,cg25773490,cg21223075,cg14814876,cg18985891,cg17282111,cg18113084,cg17202781,cg18810342,cg14766620,cg19450479,cg00401691
chr3	6901305	6905369	2	Yes	promoter	GRM7	No	15	cg06137273,cg19385628,cg09465746,cg16415870,cg04023483,cg24643102,cg21187352,cg02332525,cg27199820,cg18863595,cg17892178,cg24213507,cg20172500,cg04527363,cg00056257	21	cg06137273,cg19385628,cg09465746,cg16415870,cg04023483,cg24643102,cg21187352,cg02332525,cg06547966,cg27199820,cg00657200,cg18863595,cg09399937,cg17892178,cg24213507,cg20172500,cg04527363,cg12535229,cg02037791,cg03381598,cg00056257
chr3	8808974	8811924	2	Yes	promoter	hsa-mir-548ba,OXTR	No	16	cg14483142,cg17036624,cg00247334,cg25140571,cg23391006,cg09353063,cg17285225,cg08535600,cg00078085,cg03987506,cg19619174,cg12695586,cg27501759,cg02192228,cg04523291,cg15317815	18	cg14483142,cg25085537,cg03710862,cg17036624,cg00247334,cg23391006,cg09353063,cg17285225,cg00078085,cg03987506,cg11171527,cg19619174,cg12695586,cg27501759,cg02192228,cg04523291,cg15317815,cg03257388
chr3	9177041	9178767	3	Yes	gene body	SRGAP3	Yes	3	cg00907288,cg03018380,cg24850121	4	cg00907288,cg03018380,cg24850121,cg25429008
chr3	9288898	9291571	3	No	promoter	SRGAP3	Yes	12	cg22580937,cg19379924,cg16801535,cg13188385,cg05376919,cg03162101,cg03438515,cg23081397,cg06234300,cg21386647,cg23958524,cg22956060	16	cg22580937,cg20028158,cg12861022,cg19379924,cg16801535,cg13188385,cg05376919,cg03162101,cg03438515,cg23081397,cg06234300,cg08866234,cg21517591,cg21386647,cg23958524,cg22956060
chr3	9540923	9542942	3	No	promoter	RP11-58B17.2	No	1	cg22535057	1	cg22535057
chr3	9593025	9596339	3	Yes	promoter	LHFPL4	No	8	cg16158843,cg19822251,cg06838365,cg04061117,cg19099050,cg11084334,cg13347257,cg02703908	13	cg12607121,cg06998262,cg02530165,cg16158843,cg19822251,cg06838365,cg04061117,cg19099050,cg11084334,cg13347257,cg12841266,cg24866418,cg02703908
chr3	9744955	9747680	1	Yes	promoter	CPNE9	No	10	cg15457795,cg23681664,cg21623865,cg20051033,cg23926649,cg02741521,cg16452224,cg07551879,cg16191009,cg27376027	11	cg15457795,cg23681664,cg21623865,cg20051033,cg02741521,cg16452224,cg24888168,cg09870564,cg16191009,cg21688197,cg27376027
chr3	9810599	9812525	3	Yes	promoter	CAMK1	No	9	cg01396022,cg00841408,cg23451076,cg14558573,cg23243617,cg25949513,cg06730340,cg09511906,cg13896608	11	cg10836985,cg01396022,cg00841408,cg09417137,cg23451076,cg14558573,cg23243617,cg25949513,cg06730340,cg09511906,cg13896608
chr3	9903738	9905068	3	Yes	intergenic	NA	Yes	5	cg27513339,cg09469667,cg00498591,cg23060646,cg00119284	5	cg27513339,cg09469667,cg00498591,cg23060646,cg27173790
chr3	10546391	10548014	3	Yes	promoter	ATP2B2	No	9	cg24952744,cg13764828,cg21504961,cg15965542,cg22055119,cg15111475,cg07438288,cg14808132,cg04207166	10	cg19915194,cg24952744,cg13764828,cg15965542,cg06925115,cg22055119,cg15111475,cg07438288,cg14808132,cg04207166
chr3	10748321	10750515	3	No	promoter	ATP2B2	No	3	cg05970311,cg14499413,cg24691167	3	cg05970311,cg14499413,cg24691167
chr3	10857136	10858898	3	Yes	promoter	SLC6A11	No	13	cg15284635,cg15668533,cg09660365,cg16435571,cg26836233,cg09022422,cg10527010,cg21123160,cg22331862,cg07744841,cg18290624,cg00605982,cg09395732	17	cg15284635,cg15668533,cg09660365,cg16435571,cg26836233,cg09022422,cg10527010,cg21123160,cg22331862,cg07744841,cg18290624,cg00605982,cg09395732,cg19379302,cg02623762,cg14711969,cg05528232
chr3	11033264	11035915	2	Yes	promoter	SLC6A1	No	13	cg00162231,cg05043886,cg21528112,cg19300741,cg07466705,cg13142700,cg16164276,cg15445554,cg23405575,cg11021744,cg07646731,cg08072251,cg00375819	14	cg00162231,cg05043886,cg21528112,cg19300741,cg07466705,cg13142700,cg16164276,cg15445554,cg23405575,cg11021744,cg15643354,cg07646731,cg08072251,cg00375819
chr3	11102285	11103786	3	No	intergenic	NA	No	4	cg23940583,cg08080396,cg10030417,cg20669012	2	cg10030417,cg20669012
chr3	11195350	11197641	3	Yes	promoter	HRH1	Yes	3	cg16291962,cg07963181,cg18190847	8	cg16994200,cg16291962,cg24736201,cg07963181,cg12029630,cg19518756,cg18190847,cg04773066
chr3	11760917	11763198	1	Yes	promoter	VGLL4	No	11	cg10313625,cg08532914,cg22826718,cg26682174,cg21973517,cg19777998,cg19229702,cg23610018,cg16777620,cg10547361,cg24012756	12	cg10313625,cg08532914,cg26823696,cg22826718,cg26598978,cg21973517,cg19777998,cg19229702,cg23610018,cg16777620,cg11067451,cg10547361
chr3	11887447	11889211	3	Yes	promoter	TAMM41	No	12	cg00577147,cg03169527,cg06184463,cg08885449,cg08472978,cg15722389,cg23724095,cg22993707,cg17746675,cg22933469,cg10999566,cg23349968	14	cg09613911,cg23379342,cg16562873,cg00577147,cg03169527,cg06184463,cg08885449,cg08472978,cg15722389,cg22993707,cg17746675,cg22933469,cg10999566,cg23349968
chr3	12328331	12331031	3	Yes	promoter	PPARG	No	16	cg04908300,cg21859053,cg18887186,cg07556134,cg04632671,cg09405169,cg13518792,cg15722404,cg04748988,cg23514324,cg21946299,cg06573644,cg27095527,cg26364899,cg18063278,cg25929976	20	cg04908300,cg18303782,cg21717257,cg21859053,cg18887186,cg15938746,cg07556134,cg09405169,cg13518792,cg15722404,cg23514324,cg06340600,cg21946299,cg06573644,cg27095527,cg26364899,cg18063278,cg19182242,cg27051533,cg25929976
chr3	13033943	13037190	1	Yes	promoter	IQSEC1	Yes	7	cg20042798,cg02626656,cg17525674,cg02559896,cg13959088,cg08979183,cg01831160	11	cg03524694,cg18365622,cg25691920,cg20042798,cg24241688,cg02626656,cg17525674,cg02807201,cg13959088,cg08979183,cg01831160
chr3	13322641	13325774	3	Yes	intergenic	NA	Yes	12	cg00969119,cg20760116,cg20541238,cg12786945,cg20168412,cg18135771,cg10366178,cg08634318,cg05710562,cg10461547,cg04519485,cg00923996	10	cg00969119,cg20760116,cg20541238,cg20168412,cg18135771,cg10366178,cg08634318,cg05710562,cg10461547,cg04519485
chr3	13460233	13463171	1	Yes	promoter	NUP210	Yes	11	cg06143615,cg14473743,cg24642820,cg03931678,cg20977992,cg26785250,cg23799276,cg03011814,cg18357291,cg24511054,cg20945261	12	cg06143615,cg04443299,cg14473743,cg24642820,cg03931678,cg20977992,cg26785250,cg23799276,cg03011814,cg18357291,cg24511054,cg20945261
chr3	13919175	13922955	2	Yes	promoter	WNT7A	Yes	13	cg24336985,cg04969808,cg01166979,cg09396181,cg15328326,cg07134065,cg00625653,cg13602813,cg07657743,cg03346079,cg00730653,cg01301637,cg02398106	16	cg09130446,cg17743495,cg24336985,cg04969808,cg01166979,cg09396181,cg15328326,cg07134065,cg00625653,cg13602813,cg07657743,cg26067655,cg03346079,cg00730653,cg01301637,cg02398106
chr3	13935841	13938354	3	Yes	intergenic	NA	Yes	6	cg01220440,cg10696724,cg19554555,cg01997230,cg06391982,cg18786782	6	cg01220440,cg10696724,cg19554555,cg01997230,cg06391982,cg18786782
chr3	14642825	14645346	3	Yes	intergenic	NA	No	6	cg25845705,cg00901264,cg13745201,cg12146386,cg22991512,cg19012681	6	cg25845705,cg00901264,cg13745201,cg12146386,cg22991512,cg19012681
chr3	14850971	14854005	3	Yes	promoter	RP11-95M5.1	No	10	cg02643782,cg08673716,cg11833001,cg08263589,cg21121136,cg06854015,cg04106782,cg09354381,cg10993465,cg02424569	13	cg22207661,cg02643782,cg08864950,cg05815930,cg27387608,cg08673716,cg11833001,cg08263589,cg06854015,cg04106782,cg09354381,cg10993465,cg02424569
chr3	15371549	15375203	1	Yes	promoter	SH3BP5	No	12	cg08359336,cg15145672,cg24146408,cg17925022,cg17493765,cg24516542,cg21496518,cg21871583,cg22240853,cg03183882,cg13279476,cg02275418	19	cg26963657,cg05260576,cg11416543,cg05498649,cg00739510,cg08023849,cg08359336,cg15145672,cg11218575,cg24146408,cg17925022,cg17493765,cg24516542,cg21496518,cg21871583,cg22240853,cg03183882,cg13279476,cg02275418
chr3	16553235	16556024	3	Yes	promoter	RFTN1	No	15	cg03591499,cg17339521,cg03024536,cg20660627,cg09375878,cg23718026,cg17377625,cg22044848,cg23955684,cg22623967,cg07200280,cg04066019,cg11382133,cg10502118,cg00259834	16	cg18669861,cg17339521,cg03024536,cg20660627,cg09375878,cg23718026,cg17377625,cg22044848,cg23955684,cg14435474,cg22623967,cg07200280,cg04066019,cg11382133,cg10502118,cg00259834
chr3	16924383	16928508	3	Yes	promoter	PLCL2	No	14	cg25223095,cg06679572,cg11598976,cg14577430,cg08542227,cg12112073,cg03585549,cg12438842,cg15863826,cg02356435,cg07079828,cg18751573,cg23220897,cg01781018	16	cg25223095,cg06679572,cg11598976,cg14577430,cg08542227,cg12112073,cg03585549,cg16552026,cg12438842,cg15863826,cg02356435,cg10610461,cg07079828,cg18751573,cg23220897,cg01781018
chr3	18484241	18486609	3	Yes	promoter	AC144521.1,SATB1,TBC1D5	Yes	7	cg10242892,cg06830555,cg01740172,cg26326615,cg07185974,cg10742605,cg00390724	6	cg10242892,cg06830555,cg01740172,cg10742605,cg00390724,cg17694094
chr3	22412795	22414983	3	Yes	promoter	ZNF385D	No	8	cg25144815,cg06759374,cg25839023,cg02252323,cg06062984,cg04044720,cg21818713,cg03274391	7	cg25144815,cg06759374,cg25839023,cg06062984,cg04044720,cg21818713,cg04414766
chr3	23243334	23244496	1	Yes	promoter	UBE2E2,UBE2E2-AS1	No	5	cg13447539,cg10632094,cg18257541,cg10397322,cg16652937	9	cg24829323,cg20723588,cg21007371,cg13447539,cg24311743,cg10632094,cg18257541,cg10397322,cg16652937
chr3	24533557	24538337	3	Yes	promoter	THRB,THRB-AS1	No	29	cg13075600,cg22892432,cg08123277,cg12258785,cg07647822,cg03287940,cg25336332,cg16579438,cg27388911,cg00323305,cg21303011,cg27622506,cg27526665,cg26146027,cg25829666,cg04928005,cg26139133,cg24120841,cg13790603,cg20985755,cg12306156,cg23234832,cg15385623,cg02333852,cg00688963,cg09805010,cg13518327,cg12405742,cg17944741	32	cg13075600,cg22892432,cg08123277,cg12258785,cg25336332,cg16579438,cg27388911,cg00323305,cg21303011,cg27622506,cg27526665,cg26146027,cg25829666,cg04928005,cg26139133,cg24120841,cg13790603,cg20985755,cg12306156,cg23234832,cg15385623,cg02333852,cg09805010,cg13518327,cg15787595,cg04610410,cg24016770,cg22849544,cg12405742,cg14370568,cg00927911,cg17944741
chr3	24561938	24564453	3	Yes	promoter	MIR4792	Yes	5	cg18455523,cg01442844,cg22797570,cg21904937,cg10330019	6	cg18455523,cg13423180,cg15168942,cg01442844,cg21904937,cg10330019
chr3	24870145	24872730	3	Yes	gene body	AC133680.1	No	8	cg08443605,cg00214791,cg06664959,cg09595471,cg01156513,cg02044223,cg11166759,cg16542478	6	cg08443605,cg09595471,cg01156513,cg02044223,cg11166759,cg16542478
chr3	25468671	25472515	3	No	promoter	RARB	No	16	cg16927871,cg03428864,cg27486427,cg19003815,cg26786980,cg24396624,cg02499249,cg03481274,cg06720425,cg10712623,cg12479047,cg18094781,cg26124016,cg20899354,cg00758229,cg00371702	14	cg15809488,cg16927871,cg03428864,cg19003815,cg26786980,cg24396624,cg02499249,cg03481274,cg06720425,cg10712623,cg12479047,cg18094781,cg00758229,cg00371702
chr3	26662861	26667358	2	Yes	promoter	AC099754.1,LRRC3B	No	19	cg19600115,cg00508975,cg26263234,cg26777836,cg19115492,cg18507138,cg26365534,cg26035366,cg03496122,cg18679410,cg24216220,cg05583398,cg13787438,cg13964105,cg10332616,cg13689261,cg10768206,cg04954680,cg18404374	23	cg23683683,cg19600115,cg15969359,cg00508975,cg26263234,cg23181201,cg26777836,cg19115492,cg18507138,cg12987984,cg26035366,cg03496122,cg18679410,cg24216220,cg08646125,cg00412425,cg13787438,cg13964105,cg10332616,cg13689261,cg10768206,cg04954680,cg18404374
chr3	27753204	27759311	2	Yes	promoter	RP11-222K16.2	Yes	23	cg05409218,cg16700000,cg05260466,cg07613752,cg15263666,cg24717935,cg08855170,cg16705744,cg15042866,cg06088918,cg05774915,cg18775634,cg21448552,cg21757276,cg18847823,cg00715109,cg05619116,cg25008548,cg03363248,cg17182512,cg26066512,cg06595320,cg06047040	20	cg05409218,cg16700000,cg07613752,cg15263666,cg24717935,cg08855170,cg16705744,cg06088918,cg05774915,cg18775634,cg21448552,cg21757276,cg00715109,cg05619116,cg25008548,cg03363248,cg17182512,cg26066512,cg06595320,cg06047040
chr3	27760521	27766624	2	Yes	promoter	EOMES	No	31	cg02391509,cg26106948,cg11828621,cg18293662,cg15588215,cg19426522,cg21188820,cg16840358,cg24961583,cg15540820,cg06014401,cg22383888,cg16971668,cg02694810,cg01714811,cg07055504,cg01176458,cg15308664,cg12858460,cg14557534,cg02797548,cg24434959,cg13830203,cg16943529,cg09665320,cg15270892,cg21473142,cg20739013,cg20235075,cg06748434,cg26322816	31	cg02391509,cg26106948,cg11828621,cg18293662,cg15588215,cg19426522,cg21188820,cg16840358,cg24961583,cg15540820,cg06014401,cg02694810,cg01714811,cg07482337,cg25820914,cg17708078,cg02839268,cg11818703,cg07055504,cg01176458,cg15308664,cg12858460,cg14557534,cg14188354,cg02797548,cg13830203,cg21473142,cg20739013,cg20235075,cg06748434,cg26322816
chr3	27769012	27773732	2	Yes	intergenic	NA	No	19	cg11642106,cg05583831,cg26314330,cg17248730,cg15506591,cg27365535,cg03468466,cg03935055,cg00810956,cg07413251,cg07403152,cg02343197,cg21848524,cg19854915,cg24383418,cg14784335,cg19815340,cg06087019,cg25340466	19	cg11642106,cg05583831,cg26314330,cg17248730,cg15506591,cg27365535,cg03468466,cg03935055,cg00810956,cg07413251,cg07403152,cg02343197,cg21848524,cg19854915,cg24383418,cg14784335,cg19815340,cg06087019,cg25340466
chr3	28615814	28619807	1	Yes	promoter	LINC00693	No	9	cg10902144,cg24949783,cg08276289,cg20076842,cg13033990,cg03553587,cg25377802,cg08700032,cg00380860	12	cg10902144,cg24949783,cg23669832,cg08276289,cg20076842,cg13033990,cg03553587,cg25377802,cg08700032,cg00380860,cg08718713,cg12915421
chr3	30935320	30937082	3	Yes	promoter	GADL1	No	9	cg02741548,cg24350628,cg26350347,cg16856874,cg04556868,cg03629794,cg20498746,cg26545143,cg18005693	11	cg25599167,cg03955711,cg02741548,cg24350628,cg26350347,cg16856874,cg04556868,cg03629794,cg20498746,cg26545143,cg18005693
chr3	32020496	32024747	1	Yes	promoter	OSBPL10,ZNF860	No	16	cg25692785,cg25681469,cg15840985,cg10702818,cg27590407,cg23429042,cg19815327,cg16165903,cg05935571,cg01560739,cg14993614,cg06108181,cg04005032,cg25830640,cg18634499,cg22218058	19	cg10196203,cg25692785,cg25681469,cg26834212,cg15840985,cg10702818,cg27590407,cg23429042,cg19815327,cg16165903,cg05935571,cg01560739,cg14993614,cg06108181,cg27144791,cg04005032,cg25830640,cg18634499,cg22218058
chr3	32147401	32149436	3	Yes	promoter	GPD1L	No	12	cg21145686,cg19143336,cg01448087,cg21255732,cg23221915,cg19409588,cg17465462,cg15440363,cg15243630,cg05662500,cg19915505,cg00620452	13	cg21145686,cg19143336,cg01448087,cg21255732,cg23221915,cg19409588,cg15440363,cg15243630,cg25289297,cg05662500,cg19915505,cg18704119,cg00620452
chr3	32278595	32282163	3	Yes	promoter	CMTM8,RP11-384L8.1	No	6	cg25496930,cg10553028,cg02059034,cg08196359,cg01617750,cg20932822	8	cg03874222,cg25496930,cg10553028,cg02059034,cg08196359,cg11134544,cg01617750,cg20932822
chr3	32433327	32435212	1	Yes	promoter	CMTM7	Yes	5	cg16277214,cg15835817,cg10163776,cg08273666,cg07881061	3	cg16277214,cg15835817,cg07881061
chr3	33258849	33261440	2	Yes	promoter	SUSD5	No	10	cg07008600,cg25693769,cg13747145,cg03497399,cg13601427,cg02239862,cg04545136,cg09463233,cg10906602,cg26298814	10	cg07008600,cg25693769,cg13747145,cg03497399,cg13601427,cg02239862,cg04545136,cg09463233,cg10906602,cg26298814
chr3	35680027	35682165	2	Yes	promoter	ARPP21	No	9	cg24785473,cg10506882,cg02202141,cg19819145,cg06387459,cg24632247,cg10796805,cg05039475,cg22698904	17	cg24785473,cg12333681,cg10506882,cg02202141,cg19819145,cg07324594,cg06387459,cg10796805,cg05039475,cg01406416,cg25876637,cg26065806,cg10026389,cg22698904,cg10504927,cg19838022,cg02112616
chr3	36421094	36424454	1	Yes	promoter	STAC	No	11	cg03018634,cg06197503,cg19055231,cg26615813,cg15321293,cg24202123,cg26843074,cg04273811,cg12726960,cg01798589,cg08850369	13	cg03018634,cg06197503,cg19055231,cg26615813,cg15321293,cg24202123,cg26843074,cg04273811,cg22741516,cg23284109,cg12726960,cg01798589,cg08850369
chr3	36804443	36806813	3	Yes	intergenic	NA	Yes	5	cg07370496,cg11184748,cg24144083,cg04737283,cg21756485	6	cg07370496,cg11184748,cg24144083,cg04737283,cg21756485,cg13500705
chr3	36984755	36987463	1	Yes	promoter	TRANK1	No	14	cg10333520,cg22237644,cg17445812,cg01349853,cg11870261,cg07696485,cg03450370,cg12624667,cg01756288,cg00325599,cg06163735,cg06686826,cg07528097,cg03052030	15	cg10056635,cg10333520,cg22237644,cg17445812,cg01349853,cg11870261,cg07696485,cg03450370,cg12624667,cg01756288,cg00325599,cg06163735,cg06686826,cg07528097,cg03052030
chr3	37492633	37496163	3	Yes	promoter	ITGA9	Yes	11	cg05057834,cg04479212,cg08198176,cg05654008,cg13071386,cg25870420,cg20751361,cg02584489,cg08730726,cg13882267,cg27215765	13	cg13167075,cg05057834,cg22266222,cg08198176,cg05654008,cg13071386,cg25870420,cg20751361,cg02584489,cg08730726,cg13882267,cg27215765,cg08259931
chr3	38069344	38072153	3	Yes	promoter	PLCD1	No	8	cg15120942,cg02067846,cg25773620,cg23971255,cg03851645,cg01614883,cg24868271,cg12705340	11	cg26470390,cg26331064,cg15120942,cg02067846,cg25773620,cg23971255,cg03851645,cg01614883,cg24868271,cg12705340,cg11429281
chr3	38079975	38082017	3	Yes	promoter	DLEC1	No	9	cg15121877,cg22884020,cg12177220,cg00807586,cg00030422,cg23881725,cg20684180,cg04833533,cg15681239	10	cg15121877,cg22884020,cg12177220,cg00807586,cg00030422,cg23881725,cg20684180,cg11542528,cg16150706,cg04833533
chr3	38387688	38389770	3	Yes	promoter	XYLB	No	7	cg12340144,cg00930230,cg02153350,cg00889833,cg05102554,cg12678451,cg22536016	8	cg12340144,cg00930230,cg02153350,cg00889833,cg01343049,cg12678451,cg13559336,cg22536016
chr3	38689571	38693192	3	Yes	promoter	SCN5A	No	6	cg25116191,cg09290614,cg12926589,cg24902039,cg25510643,cg19740375	11	cg05680703,cg26189401,cg25116191,cg09290614,cg12926589,cg25604642,cg24902039,cg14061304,cg25510643,cg19740375,cg13166625
chr3	39849498	39853016	3	Yes	promoter	MYRIP	No	12	cg02707264,cg24849439,cg07892785,cg19547629,cg07876132,cg06911020,cg16435539,cg07883836,cg08270258,cg25070010,cg27549834,cg07669891	21	cg02707264,cg24849439,cg07892785,cg19547629,cg07876132,cg03000006,cg06911020,cg13946209,cg16435539,cg07883836,cg08270258,cg25070010,cg18409406,cg27549834,cg06991263,cg07251589,cg07669891,cg27308746,cg07322925,cg14261008,cg06679261
chr3	40427914	40429643	3	Yes	promoter	ENTPD3	No	9	cg17264618,cg02782426,cg18306943,cg10755058,cg13409248,cg00656387,cg17200465,cg00091569,cg16822855	15	cg02651647,cg00735845,cg03751251,cg19997965,cg02782426,cg18306943,cg15514087,cg10755058,cg13409248,cg00656387,cg04652603,cg17200465,cg14818391,cg16822855,cg27349936
chr3	42055315	42057148	3	Yes	promoter	TRAK1	No	5	cg05590619,cg12084388,cg14680989,cg23376191,cg09662571	5	cg05590619,cg12084388,cg14680989,cg23376191,cg09662571
chr3	42304150	42305822	3	Yes	promoter	CCK	No	7	cg13732201,cg06631317,cg16415785,cg05785565,cg19612450,cg21327694,cg06085877	9	cg13732201,cg06631317,cg27100229,cg26883960,cg11026611,cg16415785,cg19612450,cg21327694,cg06085877
chr3	42541777	42545315	1	Yes	promoter	VIPR1	No	14	cg23517013,cg03160740,cg25968378,cg15185458,cg16180367,cg27309542,cg22694480,cg04322483,cg11639692,cg10970409,cg23003500,cg12828331,cg27510539,cg03791150	15	cg23517013,cg03160740,cg15185458,cg16180367,cg27309542,cg22694480,cg04322483,cg11639692,cg10970409,cg19669078,cg23003500,cg12828331,cg19965088,cg27510539,cg03791150
chr3	42846000	42847429	1	Yes	promoter	ACKR2,HIGD1A	No	10	cg14508777,cg01293485,cg02718966,cg01996116,cg08292572,cg24078708,cg18181936,cg19460042,cg16674323,cg17167289	11	cg14508777,cg01293485,cg02718966,cg01996116,cg20432824,cg08292572,cg24078708,cg18181936,cg19460042,cg16674323,cg17167289
chr3	43019937	43022862	3	Yes	promoter	FAM198A	No	11	cg27423228,cg11545314,cg21396456,cg12268888,cg05982399,cg06369090,cg17374534,cg04474990,cg11020853,cg12171567,cg23432932	16	cg10496616,cg27423228,cg11545314,cg21396456,cg16641720,cg12268888,cg05982399,cg06369090,cg17374534,cg04474990,cg03100259,cg11020853,cg01328890,cg12171567,cg10430909,cg23432932
chr3	43934911	43936747	1	No	intergenic	NA	Yes	3	cg05471523,cg18784420,cg25939181	2	cg05471523,cg18784420
chr3	44035791	44042423	2	Yes	promoter	RP4-555D20.3,RP4-555D20.4	Yes	28	cg09650880,cg25512936,cg07451080,cg27606567,cg11632238,cg16646616,cg12796028,cg17614974,cg02774523,cg03889542,cg01856525,cg07289306,cg19890879,cg19444609,cg08738300,cg12580752,cg00082713,cg02569778,cg14560001,cg22573391,cg14858267,cg26256401,cg04741853,cg19509715,cg21845273,cg25937714,cg07965894,cg03168896	28	cg10792144,cg09650880,cg25512936,cg27606567,cg11632238,cg16646616,cg12796028,cg17614974,cg03889542,cg07289306,cg19890879,cg19444609,cg08738300,cg14013724,cg12580752,cg00082713,cg02569778,cg14560001,cg22573391,cg14858267,cg26256401,cg04741853,cg19509715,cg21845273,cg03001260,cg25937714,cg07965894,cg03168896
chr3	44062587	44064562	3	Yes	intergenic	NA	No	6	cg17053963,cg09384411,cg23141355,cg07040834,cg16589135,cg26365925	6	cg17053963,cg09384411,cg23141355,cg07040834,cg16589135,cg26365925
chr3	45076754	45078417	3	Yes	promoter	RNU5B-3P	No	9	cg09639152,cg16375541,cg25593573,cg17213060,cg04508804,cg00347798,cg06636831,cg17658717,cg23551917	10	cg11879008,cg09639152,cg16375541,cg25593573,cg17213060,cg04508804,cg00347798,cg06636831,cg17658717,cg23551917
chr3	45185354	45188869	1	Yes	promoter	CDCP1	Yes	6	cg15779716,cg15107641,cg13722619,cg24975222,cg02938303,cg06160898	6	cg03169744,cg15779716,cg15107641,cg13722619,cg02938303,cg21028916
chr3	45264664	45267441	3	Yes	promoter	TMEM158	No	2	cg07615342,cg05093065	1	cg05093065
chr3	45836789	45838912	3	Yes	promoter	SLC6A20	No	14	cg16309260,cg23255837,cg08826127,cg22497313,cg25924911,cg20829379,cg02716516,cg04970117,cg09700085,cg20953187,cg19137818,cg12359315,cg24940967,cg05461503	16	cg17165824,cg04012198,cg16309260,cg23255837,cg08826127,cg22497313,cg25924911,cg20829379,cg02716516,cg04970117,cg09700085,cg20953187,cg19137818,cg12359315,cg24940967,cg05461503
chr3	46733661	46735888	3	Yes	promoter	ALS2CL	No	13	cg23445604,cg00483459,cg03004985,cg25104512,cg21379004,cg19455322,cg07279281,cg03270929,cg04990724,cg23444101,cg05369142,cg11816841,cg15602512	12	cg15147194,cg23445604,cg00483459,cg03004985,cg25104512,cg21379004,cg19455322,cg07279281,cg27002818,cg03270929,cg05369142,cg11816841
chr3	46852537	46854789	1	Yes	promoter	PRSS44,PRSS50	No	8	cg16674467,cg22818556,cg19468029,cg24392548,cg22210157,cg01202358,cg00292001,cg07033202	10	cg16674467,cg22818556,cg19468029,cg19357375,cg24392548,cg01202358,cg00292001,cg07033202,cg00852100,cg14906396
chr3	46922115	46927348	2	Yes	promoter	PTH1R	Yes	14	cg17378686,cg11640591,cg10955958,cg23526861,cg05717204,cg24101560,cg23693683,cg25925764,cg10928087,cg24126187,cg08511440,cg11195494,cg20202413,cg07805345	17	cg17378686,cg11640591,cg10955958,cg23526861,cg05717204,cg00422532,cg24461695,cg23693683,cg25925764,cg10928087,cg24126187,cg10481668,cg08511440,cg11195494,cg20202413,cg23632924,cg07805345
chr3	46933200	46934987	3	Yes	promoter	PTH1R	No	6	cg02618262,cg16339096,cg10942903,cg09435674,cg24716125,cg04663057	7	cg16339096,cg15979017,cg26104910,cg10942903,cg09435674,cg24716125,cg04663057
chr3	47618747	47621623	3	Yes	promoter	CSPG5	No	14	cg15988232,cg24899315,cg01406312,cg04289624,cg21936789,cg09434670,cg13532478,cg16008009,cg02635314,cg05380296,cg01679426,cg04805109,cg07032164,cg00242358	16	cg03759549,cg15988232,cg24899315,cg01406312,cg04289624,cg21936789,cg09434670,cg13532478,cg16008009,cg02635314,cg05380296,cg04805109,cg01643110,cg11218324,cg20083113,cg07032164
chr3	50192742	50194968	3	Yes	promoter	RP11-493K19.3,SEMA3F	Yes	3	cg00220225,cg07640473,cg19515239	8	cg00220225,cg01891789,cg08887622,cg08635998,cg05458540,cg16955390,cg07640473,cg19515239
chr3	50242145	50243971	3	Yes	promoter	SLC38A3	Yes	11	cg14019146,cg13907146,cg19755318,cg14957718,cg26601922,cg07212894,cg02337349,cg16468914,cg24363298,cg19914607,cg15335139	9	cg14019146,cg13907146,cg19755318,cg26601922,cg07212894,cg02337349,cg16468914,cg24363298,cg19914607
chr3	50311673	50314415	3	Yes	gene body	SEMA3B	No	9	cg13874777,cg24019851,cg18165186,cg08097657,cg14651518,cg09811393,cg10692467,cg12069309,cg07629965	9	cg13874777,cg24019851,cg18165186,cg08097657,cg14651518,cg09811393,cg10692467,cg12069309,cg07629965
chr3	50377130	50379225	3	Yes	promoter	RASSF1,ZMYND10,ZMYND10-AS1	Yes	15	cg22090713,cg03297783,cg04540383,cg06172942,cg25486143,cg27569446,cg21554552,cg25747192,cg08047457,cg12966367,cg04743654,cg00777121,cg13872831,cg24859722,cg21908110	14	cg13028433,cg22090713,cg03297783,cg04540383,cg06172942,cg25486143,cg27569446,cg21554552,cg25747192,cg08047457,cg12966367,cg13872831,cg24859722,cg21908110
chr3	50382376	50383761	3	Yes	promoter	ZMYND10	No	11	cg16621790,cg21847393,cg02495395,cg04322105,cg06088032,cg00460268,cg09682796,cg23208152,cg11270070,cg20881888,cg06704605	12	cg08073822,cg16181557,cg16621790,cg21847393,cg02495395,cg04322105,cg03421687,cg00460268,cg23208152,cg11270070,cg20881888,cg06704605
chr3	50539131	50541773	1	Yes	promoter	CACNA2D2	No	14	cg04347447,cg23162001,cg19447156,cg13577493,cg07391485,cg03089869,cg00486627,cg20220436,cg03035248,cg19922281,cg09087110,cg04863703,cg04015972,cg04555771	14	cg18690361,cg03402432,cg04347447,cg16419211,cg19447156,cg13577493,cg03089869,cg00486627,cg20220436,cg03035248,cg19922281,cg09087110,cg04015972,cg04555771
chr3	50711136	50712573	3	Yes	promoter	DOCK3,MIR4787	No	4	cg15322641,cg12687897,cg18501026,cg01048561	5	cg15322641,cg12687897,cg18501026,cg08673882,cg01048561
chr3	51740853	51742171	3	Yes	promoter	GRM2	No	5	cg21213853,cg00303541,cg12934382,cg04453050,cg00664406	7	cg23585673,cg21213853,cg00303541,cg12934382,cg26079664,cg04453050,cg00664406
chr3	51989204	51991223	3	Yes	promoter	GPR62	No	7	cg24254837,cg12593812,cg25499397,cg22621867,cg01844642,cg08072716,cg25773386	7	cg24254837,cg12593812,cg25499397,cg22621867,cg01844642,cg08072716,cg25773386
chr3	52007216	52010325	3	Yes	promoter	ABHD14A,ABHD14A-ACY1,ABHD14B,ACY1,RP11-155D18.12,RP11-155D18.14	Yes	17	cg03638479,cg10938441,cg19440233,cg26791985,cg11491074,cg10247798,cg12623930,cg27563048,cg05541640,cg10630880,cg01966966,cg18328933,cg04474832,cg09254361,cg10252695,cg19602773,cg11830695	21	cg03638479,cg10938441,cg25115592,cg19440233,cg19902797,cg26791985,cg11491074,cg06752231,cg10247798,cg12623930,cg27563048,cg05541640,cg01966966,cg18328933,cg04474832,cg03436206,cg12047194,cg09254361,cg10252695,cg19602773,cg11830695
chr3	52278847	52281035	3	Yes	promoter	PPM1M	No	13	cg08144943,cg02417408,cg07773769,cg11159295,cg13255056,cg05406954,cg13238350,cg12612091,cg21408716,cg07738533,cg21386373,cg20276750,cg08438690	16	cg08144943,cg02417408,cg07773769,cg11159295,cg13255056,cg05406954,cg11056739,cg13238350,cg12612091,cg21408716,cg06044809,cg04595163,cg27547378,cg21386373,cg20276750,cg08438690
chr3	53077703	53079381	3	Yes	promoter	SFMBT1	No	3	cg19373170,cg10299061,cg04503182	3	cg19373170,cg10299061,cg04503182
chr3	53079669	53081747	1	Yes	promoter	SFMBT1	No	4	cg19008809,cg03607117,cg09744376,cg04504284	7	cg22049472,cg24775474,cg22581676,cg19008809,cg03607117,cg09744376,cg04504284
chr3	53527115	53530742	3	Yes	promoter	CACNA1D	No	14	cg14843888,cg15473186,cg10409919,cg08480458,cg14337339,cg12668309,cg01942127,cg01386883,cg27335600,cg08478447,cg20626645,cg07883600,cg27239921,cg24342051	14	cg14843888,cg15473186,cg10409919,cg08480458,cg14337339,cg12668309,cg01942127,cg11120353,cg26749175,cg01386883,cg27335600,cg08478447,cg07883600,cg27239921
chr3	53878954	53881455	1	Yes	promoter	CHDH,IL17RB	No	9	cg18859045,cg12991365,cg05331498,cg13036855,cg08887694,cg19744587,cg16448309,cg07356771,cg17810853	13	cg01265281,cg18859045,cg12991365,cg05331498,cg13036855,cg25538887,cg08342169,cg23897178,cg08887694,cg16448309,cg07356771,cg17626378,cg13346178
chr3	54121076	54122793	3	Yes	intergenic	NA	No	7	cg15798837,cg01296889,cg18257810,cg22350305,cg00345443,cg18447876,cg19394866	5	cg15798837,cg01296889,cg00345443,cg18447876,cg19394866
chr3	54154082	54158570	2	Yes	promoter	CACNA2D3	No	17	cg15603311,cg01559726,cg17563235,cg23537887,cg12228245,cg16660661,cg08805144,cg10137084,cg07449069,cg15577178,cg18143243,cg20982412,cg12609243,cg04362858,cg06612215,cg12173409,cg04075781	21	cg15603311,cg01559726,cg17563235,cg23537887,cg12228245,cg06840389,cg16660661,cg08805144,cg22480178,cg16788803,cg10137084,cg07449069,cg15577178,cg18143243,cg20982412,cg12609243,cg04362858,cg06612215,cg14297455,cg12173409,cg04075781
chr3	55513242	55524906	3	Yes	promoter	WNT5A,WNT5A-AS1	Yes	52	cg25119690,cg04394267,cg17701073,cg24377179,cg07278054,cg26468336,cg06678678,cg16638266,cg15070848,cg24080313,cg09615965,cg08514735,cg15361065,cg08174718,cg15757271,cg02708401,cg13874466,cg15051960,cg24942186,cg22615158,cg12622139,cg19554389,cg24049183,cg00828602,cg09024340,cg10250321,cg26712080,cg17246714,cg11293176,cg23456221,cg02867696,cg08666668,cg24216596,cg04941246,cg17679453,cg18010752,cg1…	60	cg07648456,cg15114999,cg15890774,cg25119690,cg04394267,cg17701073,cg24377179,cg07278054,cg26468336,cg06678678,cg14298807,cg16638266,cg24080313,cg09615965,cg08514735,cg15361065,cg08174718,cg21498653,cg15757271,cg23780614,cg15183882,cg20632841,cg02708401,cg15051960,cg24942186,cg22615158,cg12622139,cg00828602,cg09024340,cg26712080,cg17246714,cg11293176,cg23456221,cg02867696,cg24216596,cg04941246,cg1…
chr3	56834191	56836101	3	Yes	promoter	ARHGEF3	No	4	cg20509080,cg09641077,cg20138711,cg01016119	5	cg24407312,cg09641077,cg20138711,cg01016119,cg10816539
chr3	57111600	57114677	3	Yes	promoter	ARHGEF3,RP11-157F20.3	No	9	cg06521544,cg10147507,cg11430718,cg26259546,cg16978797,cg11741902,cg00478127,cg24634060,cg02031326	14	cg06521544,cg07256062,cg25749802,cg10147507,cg26259546,cg25878746,cg16978797,cg24555290,cg16127205,cg11741902,cg12715857,cg00478127,cg24634060,cg02031326
chr3	57194019	57199425	3	Yes	promoter	IL17RD	Yes	8	cg13017478,cg15854067,cg19764345,cg14936968,cg04922566,cg03745372,cg00743540,cg05138949	8	cg13017478,cg15854067,cg19764345,cg14936968,cg04922566,cg03745372,cg00743540,cg05138949
chr3	57261979	57263590	3	Yes	promoter	APPL1	No	6	cg05963604,cg11264669,cg17216904,cg24598678,cg09433780,cg12733907	6	cg05963604,cg11264669,cg17216904,cg24598678,cg09433780,cg12733907
chr3	58223478	58224971	3	Yes	promoter	ABHD6	No	3	cg19178320,cg07671174,cg10572794	3	cg19178320,cg25113616,cg10572794
chr3	58570283	58573400	3	Yes	promoter	FAM107A	Yes	8	cg16203594,cg26015087,cg11603443,cg22812733,cg01562471,cg04047146,cg23144063,cg11661534	13	cg12740523,cg25695556,cg02822062,cg17307961,cg08148545,cg26735544,cg16203594,cg26015087,cg11603443,cg00670891,cg22812733,cg07504682,cg11661534
chr3	62350626	62361116	2	Yes	promoter	FEZF2,PTPRG-AS1	No	42	cg09024435,cg06819546,cg04927889,cg14261840,cg06707343,cg27564792,cg08681924,cg08252579,cg11374425,cg24705960,cg06423920,cg19227130,cg15812348,cg19629292,cg14651453,cg18902742,cg26136365,cg18104012,cg03986829,cg02083234,cg18525486,cg20072171,cg15422685,cg16817826,cg10542584,cg03915638,cg12988424,cg18175809,cg11178293,cg12378187,cg00503302,cg26825532,cg03308652,cg11602901,cg06327727,cg22618215,cg2…	42	cg09024435,cg06819546,cg04927889,cg14261840,cg06707343,cg27564792,cg25082847,cg13304093,cg08681924,cg08252579,cg11374425,cg24705960,cg06423920,cg19227130,cg15812348,cg19629292,cg14651453,cg22591525,cg18902742,cg26136365,cg18104012,cg03986829,cg02083234,cg18525486,cg20072171,cg15422685,cg16817826,cg10542584,cg03915638,cg12988424,cg11178293,cg12378187,cg00503302,cg15085704,cg24851478,cg26825532,cg0…
chr3	62362281	62365807	2	Yes	intergenic	NA	Yes	21	cg24036280,cg05136510,cg14484056,cg27253807,cg17480278,cg09891125,cg20976456,cg24255089,cg07045330,cg26783679,cg05344949,cg13720108,cg07791011,cg08994384,cg18345386,cg20037507,cg25741487,cg10997479,cg24945701,cg17886399,cg01427909	21	cg24036280,cg05136510,cg14484056,cg27253807,cg17480278,cg09891125,cg20976456,cg24255089,cg07045330,cg26783679,cg05344949,cg13720108,cg07791011,cg08994384,cg18345386,cg20037507,cg25741487,cg10997479,cg24945701,cg17886399,cg01427909
chr3	63263216	63265602	3	Yes	promoter	SYNPR	No	10	cg15772216,cg14183384,cg15056773,cg25854303,cg08536228,cg06314761,cg04785972,cg09462808,cg22189386,cg00418828	12	cg15772216,cg04474192,cg14183384,cg15056773,cg25854303,cg08536228,cg06314761,cg04785972,cg09462808,cg02141701,cg22189386,cg00418828
chr3	64429288	64432078	3	Yes	promoter	PRICKLE2,RP11-14D22.1,RP11-14D22.2	No	8	cg26855918,cg11236526,cg26625518,cg03610227,cg23483656,cg17622527,cg02071172,cg19630681	10	cg04198545,cg26855918,cg26625518,cg16781100,cg09585725,cg03610227,cg23483656,cg17622527,cg02071172,cg19630681
chr3	64669857	64675382	2	Yes	promoter	ADAMTS9,ADAMTS9-AS2	Yes	24	cg25121125,cg01336855,cg17626022,cg12187213,cg21878275,cg11427510,cg01424460,cg14935258,cg25157607,cg00676660,cg23070026,cg00508543,cg12478384,cg04366011,cg03427905,cg15956237,cg21938436,cg04421973,cg07891473,cg26061177,cg25859972,cg22081832,cg11044162,cg09616536	30	cg24627961,cg25121125,cg01773202,cg01336855,cg17626022,cg12187213,cg06077949,cg23761114,cg21878275,cg11427510,cg01424460,cg14935258,cg25157607,cg00676660,cg23070026,cg03312855,cg00508543,cg12478384,cg03427905,cg15956237,cg21938436,cg04421973,cg14640984,cg13978436,cg07891473,cg26061177,cg25859972,cg22081832,cg11044162,cg09616536
chr3	68056042	68057928	3	Yes	promoter	FAM19A1	No	6	cg10131312,cg21186449,cg13066983,cg00318796,cg09398550,cg03530364	6	cg08657182,cg10131312,cg21186449,cg13066983,cg09398550,cg03530364
chr3	68979974	68982465	1	Yes	promoter	FAM19A4	No	14	cg03427298,cg08038353,cg05893614,cg20375342,cg13921352,cg12412079,cg09868336,cg12219082,cg12417685,cg23967169,cg15356923,cg03186486,cg01405004,cg08495813	15	cg03427298,cg08038353,cg19061171,cg04347354,cg05893614,cg20375342,cg13921352,cg12412079,cg09868336,cg12219082,cg12417685,cg23967169,cg15356923,cg03186486,cg08495813
chr3	69434070	69436160	3	Yes	promoter	FRMD4B	No	7	cg13424909,cg07164133,cg10178228,cg05795931,cg14707269,cg02519681,cg01998750	10	cg13424909,cg19522075,cg20351226,cg10178228,cg05795931,cg18433615,cg25291526,cg14707269,cg02519681,cg01998750
chr3	69589814	69592858	3	Yes	intergenic	NA	No	11	cg00090936,cg10024876,cg01002529,cg17277892,cg01360618,cg08768852,cg06652315,cg02596331,cg01381171,cg16629288,cg11871739	10	cg00090936,cg10024876,cg01002529,cg17277892,cg01360618,cg08768852,cg06652315,cg01381171,cg16629288,cg11871739
chr3	69787241	69790327	3	Yes	promoter	MITF	Yes	10	cg12466700,cg07499607,cg07884487,cg08463543,cg17997310,cg14246617,cg00838150,cg05277991,cg07231544,cg10581281	15	cg25934664,cg07499607,cg07884487,cg08463543,cg17997310,cg14246617,cg10160567,cg02426343,cg00838150,cg06517138,cg05277991,cg07231544,cg10581281,cg17926821,cg24646393
chr3	71628638	71632437	3	Yes	promoter	FOXP1	Yes	7	cg20077169,cg09312708,cg18481137,cg06690760,cg07516697,cg05549077,cg02520804	7	cg20077169,cg09312708,cg18481137,cg06690760,cg07516697,cg05549077,cg07356798
chr3	71772643	71774464	3	Yes	promoter	EIF4E3	Yes	2	cg03392679,cg04874261	3	cg03392679,cg04874261,cg20267559
chr3	71801483	71805633	1	Yes	promoter	EIF4E3,GPR27	No	12	cg02995710,cg03457142,cg04087740,cg13026730,cg20863339,cg10172415,cg13562542,cg03024619,cg04408595,cg22823146,cg03604840,cg22631938	21	cg02995710,cg03457142,cg25315031,cg04087740,cg13026730,cg26802641,cg22315533,cg20863339,cg17123508,cg10172415,cg23779574,cg01486023,cg22721114,cg13562542,cg03024619,cg09944412,cg14835057,cg04408595,cg22823146,cg03604840,cg22631938
chr3	71832933	71835801	2	Yes	promoter	PROK2	Yes	11	cg19388776,cg19822518,cg20391883,cg08555612,cg00620018,cg23039279,cg15798455,cg01025398,cg05515792,cg09655952,cg14981807	16	cg14024810,cg19388776,cg19822518,cg20391883,cg26731715,cg08555612,cg13799201,cg00620018,cg00188450,cg23039279,cg15798455,cg01025398,cg05515792,cg09655952,cg14981807,cg02751829
chr3	72148533	72150771	3	No	promoter	LINC00877	No	6	cg16905100,cg19996971,cg02607683,cg15135047,cg20852250,cg03652525	10	cg14342973,cg16905100,cg02607683,cg16574909,cg03400944,cg19099626,cg26882827,cg15135047,cg20852250,cg03652525
chr3	72787329	72789128	3	Yes	intergenic	NA	No	5	cg25664220,cg10804678,cg27402429,cg04365224,cg11278506	5	cg25664220,cg10804678,cg27402429,cg04365224,cg11278506
chr3	72896051	72898817	3	Yes	promoter	SHQ1	No	15	cg14509623,cg13049629,cg13347201,cg23870282,cg23056042,cg17906146,cg14917700,cg24248486,cg00702577,cg19224656,cg11198863,cg01992890,cg02866304,cg07890514,cg04777971	19	cg14509623,cg13049629,cg26527232,cg15972662,cg13347201,cg23870282,cg23056042,cg17906146,cg14917700,cg24248486,cg00702577,cg19224656,cg11198863,cg01992890,cg02866304,cg07890514,cg25562545,cg04777971,cg14642088
chr3	72935871	72939258	3	No	promoter	GXYLT2	Yes	2	cg17946284,cg01285164	6	cg17810964,cg17946284,cg26143221,cg18482225,cg08426034,cg01285164
chr3	73670730	73675419	3	Yes	promoter	PDZRN3,PDZRN3-AS1	No	21	cg14753334,cg03869608,cg23822879,cg21751983,cg13688769,cg23489627,cg14473924,cg24353443,cg05502701,cg10111115,cg08141424,cg25486757,cg26055770,cg11148130,cg20132590,cg25865467,cg05277096,cg12584826,cg21531685,cg07146912,cg03148457	23	cg05603281,cg14753334,cg03869608,cg23822879,cg13688769,cg23489627,cg14473924,cg24353443,cg05502701,cg10111115,cg08141424,cg25486757,cg26055770,cg11148130,cg20132590,cg25865467,cg05277096,cg13105453,cg12584826,cg21531685,cg07146912,cg04263813,cg03148457
chr3	74662401	74664695	3	Yes	intergenic	NA	No	10	cg06816668,cg22170177,cg09714778,cg00735667,cg24346629,cg27266382,cg13132182,cg00191178,cg23170439,cg11361636	9	cg06816668,cg22170177,cg09714778,cg00735667,cg24346629,cg13132182,cg00191178,cg23170439,cg11361636
chr3	75628184	75629739	3	Yes	promoter	CTD-2026G6.3	No	4	cg18676082,cg05586304,cg26370226,cg04382358	4	cg18676082,cg05586304,cg26370226,cg04382358
chr3	75667528	75669654	3	Yes	intergenic	NA	Yes	7	cg17866711,cg20899713,cg26435928,cg05596328,cg10226952,cg27328797,cg10026966	7	cg17866711,cg20899713,cg26435928,cg05596328,cg10226952,cg27328797,cg10026966
chr3	75704018	75705604	3	Yes	intergenic	NA	No	5	cg04572206,cg03991721,cg10989214,cg15969768,cg06180137	4	cg04572206,cg03991721,cg10989214,cg06180137
chr3	75706741	75708669	3	Yes	intergenic	NA	No	5	cg09747670,cg03672716,cg01435641,cg03852468,cg04320257	5	cg09747670,cg03672716,cg01435641,cg03852468,cg04320257
chr3	75715675	75722805	2	Yes	promoter	LINC00960	No	10	cg12809341,cg21152376,cg21542951,cg10988124,cg05144642,cg05472420,cg08817168,cg09713616,cg03579624,cg27180636	14	cg27100953,cg00972672,cg12809341,cg21152376,cg21542951,cg03534746,cg10988124,cg05144642,cg05472420,cg08817168,cg10303912,cg09713616,cg03579624,cg27180636
chr3	77087314	77092483	3	Yes	promoter	ROBO2	Yes	11	cg25839267,cg16718624,cg17189465,cg07638884,cg14473568,cg23016734,cg17470327,cg06353425,cg11033835,cg19395074,cg27317909	13	cg06007042,cg25839267,cg16231954,cg12349027,cg16718624,cg17189465,cg07638884,cg14473568,cg23016734,cg25011019,cg17470327,cg11033835,cg27317909
chr3	79814753	79818155	3	Yes	promoter	ROBO1	No	12	cg11630696,cg18703601,cg08661007,cg21743712,cg07997035,cg10243398,cg07287167,cg16989059,cg21865845,cg15325658,cg04562217,cg11980129	17	cg26954859,cg11630696,cg18703601,cg10293426,cg08661007,cg01239827,cg10407200,cg08305038,cg21743712,cg19823985,cg07997035,cg10243398,cg07287167,cg16989059,cg21865845,cg04562217,cg11980129
chr3	87037847	87040350	3	Yes	promoter	VGLL3	Yes	11	cg02109726,cg12615137,cg15624852,cg20109541,cg16373010,cg06251539,cg14629075,cg13680438,cg06391577,cg23236408,cg11737164	9	cg15624852,cg20109541,cg16373010,cg06251539,cg14629075,cg13680438,cg06391577,cg23236408,cg11737164
chr3	87840962	87843252	3	Yes	promoter	RP11-451B8.1	No	3	cg00290892,cg23039333,cg27175471	2	cg19793404,cg27175471
chr3	89155904	89158115	3	No	promoter	EPHA3	No	8	cg23429903,cg22619563,cg02517134,cg05676541,cg10315231,cg18055394,cg01360628,cg16797972	12	cg22619563,cg02517134,cg05676541,cg09494835,cg20054085,cg10315231,cg02754737,cg18055394,cg14958531,cg17485965,cg01360628,cg16797972
chr3	89162795	89164604	3	Yes	gene body	EPHA3	Yes	4	cg04238185,cg05475667,cg03321003,cg17549100	4	cg04238185,cg05475667,cg03321003,cg17549100
chr3	93691542	93693425	3	Yes	promoter	PROS1	No	6	cg10993409,cg05897638,cg24305970,cg09400966,cg01408194,cg03168026	6	cg10993409,cg05897638,cg24305970,cg09400966,cg01408194,cg03168026
chr3	96531254	96534863	3	Yes	promoter	EPHA6	No	15	cg01822130,cg26364205,cg05827732,cg15405439,cg09301294,cg11410023,cg02055132,cg15093079,cg07254054,cg11980016,cg00652796,cg08708747,cg11090352,cg21388527,cg14959291	13	cg26364205,cg05827732,cg15405439,cg09301294,cg11410023,cg05037656,cg10001942,cg15093079,cg11980016,cg00652796,cg11090352,cg21388527,cg14959291
chr3	97539587	97543074	1	Yes	promoter	CRYBG3	No	10	cg02997851,cg14732969,cg20103104,cg03416541,cg22696252,cg17017335,cg16773881,cg08023796,cg19851999,cg01148786	13	cg02997851,cg14732969,cg20103104,cg03416541,cg22696252,cg13083974,cg16170306,cg17017335,cg02289812,cg16773881,cg08023796,cg19851999,cg01148786
chr3	97689859	97691980	3	Yes	promoter	MINA	No	6	cg14941179,cg23629183,cg10779801,cg05451573,cg24960158,cg22299097	9	cg02949363,cg14941179,cg23629183,cg10779801,cg05451573,cg26868457,cg06621881,cg24960158,cg22299097
chr3	98450374	98454195	1	Yes	promoter	ST3GAL6,ST3GAL6-AS1	No	11	cg07390647,cg10128511,cg13338207,cg20521702,cg04251363,cg11362770,cg09088257,cg26474288,cg16449251,cg00229423,cg18182358	18	cg07390647,cg10128511,cg13338207,cg20521702,cg04251363,cg11362770,cg09088257,cg19586904,cg21040807,cg26474288,cg16449251,cg00229423,cg19193036,cg18182358,cg00920431,cg02079985,cg17571690,cg05006728
chr3	99354712	99359998	3	No	promoter	COL8A1	Yes	6	cg05283542,cg02441647,cg19968403,cg18056266,cg20948024,cg03277051	9	cg05283542,cg02441647,cg19968403,cg09782454,cg18056266,cg20948024,cg03277051,cg08078966,cg27434411
chr3	99593336	99596449	1	Yes	promoter	FILIP1L	No	6	cg18337222,cg22092811,cg13132965,cg20276377,cg15963552,cg00210994	11	cg10561392,cg14394740,cg13790797,cg03671265,cg18337222,cg22092811,cg04271054,cg13132965,cg20276377,cg15963552,cg00210994
chr3	105085778	105089726	3	Yes	promoter	ALCAM	Yes	14	cg21548071,cg19254830,cg18453904,cg07942010,cg07677545,cg12226306,cg05645404,cg03416645,cg22557207,cg03376719,cg18081171,cg08454485,cg08143003,cg02582608	16	cg21548071,cg07571977,cg19254830,cg18453904,cg07942010,cg07677545,cg12226306,cg05645404,cg03416645,cg22557207,cg03376719,cg18081171,cg08454485,cg08143003,cg18756498,cg02582608
chr3	107147882	107151890	1	Yes	promoter	RP11-115H18.1	Yes	11	cg01106753,cg27138727,cg07647108,cg06080831,cg08228350,cg27199976,cg01208908,cg06186646,cg14552401,cg04236540,cg19401033	12	cg18452676,cg01106753,cg27138727,cg06080831,cg03435772,cg08228350,cg27199976,cg01208908,cg06186646,cg14552401,cg04236540,cg19401033
chr3	107243989	107245658	3	No	gene body	BBX	No	3	cg02321062,cg03792947,cg21587412	3	cg02321062,cg03792947,cg21587412
chr3	107645752	107647712	3	Yes	gene body	LINC00636	No	7	cg23536530,cg14672154,cg03454876,cg01706789,cg21530552,cg14141331,cg18419164	5	cg23536530,cg03454876,cg01706789,cg21530552,cg18419164
chr3	107807785	107811195	3	Yes	promoter	CD47	Yes	14	cg06806080,cg00492070,cg02487233,cg11741004,cg25881170,cg17216759,cg16637917,cg25382848,cg12363545,cg16322893,cg09643587,cg20824576,cg21789849,cg00876191	16	cg06806080,cg00492070,cg02487233,cg11741004,cg25881170,cg17216759,cg16637917,cg25382848,cg09273969,cg12363545,cg16322893,cg09643587,cg20824576,cg21789849,cg00876191,cg03187166
chr3	111392230	111393577	3	Yes	promoter	PLCXD2	No	11	cg01234645,cg26542214,cg23328922,cg00179328,cg12031396,cg23241328,cg16453615,cg01745657,cg06127931,cg08062023,cg05669906	13	cg01234645,cg26542214,cg23328922,cg00179328,cg12031396,cg16453615,cg01745657,cg06127931,cg08062023,cg05669906,cg03034417,cg11632675,cg09293874
chr3	111717143	111720664	1	No	promoter	TAGLN3	No	12	cg17553353,cg20941855,cg18998911,cg20126106,cg19778003,cg13441378,cg14098532,cg20925462,cg14770958,cg04671541,cg25183613,cg11104313	17	cg15962671,cg03724874,cg17553353,cg20941855,cg18998911,cg20126106,cg19778003,cg10053169,cg13441378,cg14098532,cg08570199,cg20925462,cg14770958,cg04671541,cg19299034,cg25183613,cg11104313
chr3	112929223	112934179	3	Yes	promoter	BOC	No	19	cg25132931,cg00652846,cg24572745,cg17457807,cg13765303,cg13001495,cg07873980,cg18742893,cg10529387,cg16341592,cg06189303,cg05953927,cg27085904,cg10954363,cg23260991,cg07676669,cg19119945,cg23091117,cg23646888	20	cg25132931,cg00652846,cg24572745,cg17457807,cg13765303,cg13001495,cg18742893,cg10529387,cg16341592,cg06189303,cg05953927,cg27085904,cg10954363,cg20722587,cg00373971,cg18432201,cg07676669,cg19119945,cg23091117,cg23646888
chr3	113250839	113253037	2	Yes	promoter	SIDT1	No	13	cg00726615,cg25160915,cg01577821,cg16503618,cg11810961,cg10741399,cg03621988,cg03977782,cg07196014,cg19836460,cg11138929,cg00481161,cg12596171	13	cg00726615,cg25160915,cg01577821,cg11810961,cg10741399,cg03621988,cg03977782,cg07196014,cg11138929,cg11695283,cg00481161,cg12596171,cg02743293
chr3	116161485	116164789	3	No	promoter	LSAMP	No	8	cg25315362,cg06204062,cg19124036,cg17300391,cg15688396,cg26033586,cg19939065,cg14294758	12	cg23106087,cg25315362,cg00594894,cg06204062,cg01495440,cg19124036,cg17300391,cg15688396,cg26033586,cg19939065,cg14294758,cg19500345
chr3	117714413	117717009	3	Yes	promoter	LSAMP,RP11-384F7.2	Yes	6	cg11730195,cg10029213,cg07477792,cg15509235,cg15453392,cg01926614	11	cg26252956,cg17801117,cg26897765,cg11730195,cg10029213,cg11400792,cg19642588,cg07477792,cg15509235,cg15453392,cg01926614
chr3	119011937	119015587	3	Yes	promoter	ARHGAP31	No	10	cg12764921,cg27533604,cg18100827,cg20785333,cg13696566,cg02002494,cg25640619,cg20677142,cg18470594,cg12580583	13	cg02745009,cg17727159,cg12764921,cg27533604,cg18100827,cg20785333,cg13696566,cg11696831,cg25640619,cg20677142,cg19523333,cg18470594,cg12580583
chr3	119297660	119299810	1	Yes	promoter	ADPRH,RP11-190C22.9	No	12	cg16904330,cg15052854,cg14399078,cg14322429,cg16016176,cg02571907,cg19932227,cg11593482,cg23345097,cg18027174,cg17283447,cg05961212	14	cg20142941,cg16904330,cg14399078,cg14322429,cg16016176,cg02571907,cg19932227,cg11593482,cg23345097,cg18027174,cg17283447,cg05961212,cg03131219,cg15564579
chr3	119421634	119423148	3	Yes	promoter	MAATS1	No	6	cg23202738,cg04602284,cg08145590,cg21372329,cg02202980,cg01663469	5	cg04602284,cg08145590,cg21372329,cg02202980,cg01663469
chr3	120002803	120004933	3	Yes	promoter	GPR156	Yes	10	cg11615607,cg15996342,cg02826439,cg15602740,cg01168235,cg12985477,cg15056966,cg00491927,cg24942922,cg04175809	10	cg11615607,cg15996342,cg02826439,cg15602740,cg01168235,cg12985477,cg15056966,cg00491927,cg24942922,cg04175809
chr3	121902104	121904153	3	Yes	promoter	CASR	No	11	cg07607922,cg07629454,cg25729826,cg05937969,cg06582394,cg18159840,cg17453778,cg19108881,cg26855836,cg04585378,cg11008866	15	cg07607922,cg07629454,cg21748401,cg01739661,cg14006863,cg25729826,cg05937969,cg20043137,cg06582394,cg17453778,cg19108881,cg26855836,cg04585378,cg11008866,cg10344373
chr3	122397982	122401227	1	Yes	promoter	PARP14	Yes	12	cg01948202,cg07184411,cg07898018,cg19918429,cg22972380,cg13745852,cg11229284,cg03315247,cg16232327,cg19241468,cg19597529,cg00926285	15	cg01948202,cg07184411,cg07898018,cg19918429,cg22972380,cg13745852,cg11229284,cg16728309,cg03315247,cg23669186,cg16232327,cg19597529,cg26882438,cg00272009,cg00926285
chr3	122640202	122641788	3	Yes	gene body	SEMA5B	No	7	cg19141448,cg25439655,cg10783060,cg18073906,cg24925929,cg19389001,cg07297832	8	cg19141448,cg25439655,cg10783060,cg00729894,cg18073906,cg24925929,cg19389001,cg07297832
chr3	122743876	122748218	1	Yes	promoter	SEMA5B	No	15	cg11014960,cg13428477,cg09555073,cg04565661,cg21395519,cg07330630,cg03642425,cg09241381,cg22549268,cg10084513,cg20288129,cg11483789,cg26105015,cg02586610,cg06656414	15	cg11014960,cg13428477,cg00212549,cg09555073,cg04565661,cg21395519,cg07330630,cg03642425,cg22549268,cg10084513,cg20288129,cg11483789,cg26105015,cg02586610,cg06656414
chr3	123166252	123169954	3	Yes	promoter	ADCY5	No	11	cg05029189,cg13483026,cg02978184,cg13384396,cg04138502,cg15993383,cg13878010,cg04908625,cg19013391,cg25661931,cg08598988	13	cg24015381,cg21037444,cg08420598,cg05029189,cg02978184,cg08586168,cg13384396,cg04138502,cg15993383,cg13878010,cg04908625,cg25661931,cg08598988
chr3	123601826	123603139	1	Yes	promoter	MYLK	Yes	4	cg01817204,cg27345757,cg00268185,cg04376312	3	cg27345757,cg00268185,cg04376312
chr3	123750535	123751966	1	Yes	intergenic	NA	No	3	cg25567674,cg07349815,cg11160408	3	cg25567674,cg07349815,cg11160408
chr3	123752174	123754056	3	Yes	intergenic	NA	No	7	cg25141957,cg06755992,cg15727308,cg01296199,cg18530113,cg02334314,cg25450449	7	cg25141957,cg06755992,cg15727308,cg01296199,cg18530113,cg02334314,cg25450449
chr3	124302806	124306626	3	Yes	promoter	KALRN	No	9	cg04915618,cg24175649,cg14874541,cg19522900,cg10338082,cg04516112,cg20925263,cg06205331,cg14688451	14	cg04915618,cg24175649,cg14874541,cg19522900,cg02754399,cg10338082,cg18981420,cg23837547,cg04516112,cg20925263,cg22422051,cg13648874,cg06205331,cg14688451
chr3	124771050	124774814	3	Yes	promoter	HEG1	Yes	4	cg23053438,cg24491122,cg01378515,cg00529567	5	cg23053438,cg27139783,cg01378515,cg00529567,cg11896799
chr3	124930120	124932805	1	Yes	promoter	SLC12A8	No	11	cg25260865,cg25611254,cg14391622,cg09363539,cg07755390,cg19768599,cg10747115,cg12662091,cg20208384,cg06983508,cg07405771	15	cg25260865,cg25611254,cg14391622,cg09363539,cg08325501,cg07755390,cg19768599,cg10747115,cg12662091,cg20208384,cg06983508,cg07405771,cg20911357,cg07190819,cg08878228
chr3	125690362	125691671	3	No	gene body	ROPN1B	No	5	cg13431165,cg04844977,cg18651515,cg05258757,cg13252540	5	cg13431165,cg04844977,cg18651515,cg05258757,cg13252540
chr3	125898093	125900612	1	Yes	promoter	ALDH1L1,ALDH1L1-AS2	No	18	cg08481491,cg20988073,cg21601837,cg07330230,cg02569236,cg16771578,cg11022432,cg02564134,cg07800320,cg07034362,cg06240450,cg16312163,cg01566526,cg11009245,cg10761979,cg05837401,cg27282530,cg03825231	22	cg25308173,cg08481491,cg20988073,cg21601837,cg07330230,cg02569236,cg11022432,cg15798800,cg03227148,cg02564134,cg22363008,cg07800320,cg07034362,cg06240450,cg16312163,cg10761979,cg05837401,cg09591866,cg12263602,cg03697693,cg13495111,cg03825231
chr3	125931321	125933228	1	Yes	intergenic	NA	No	6	cg17304646,cg06827562,cg17230874,cg11252792,cg01566555,cg01346077	6	cg08492814,cg17304646,cg17230874,cg11252792,cg01566555,cg01346077
chr3	126005802	126007928	3	Yes	gene body	RP11-71E19.1,RP11-71E19.2	No	9	cg13708016,cg11830761,cg03670452,cg03438417,cg14310703,cg16342439,cg19477084,cg00344900,cg07099588	9	cg13708016,cg03670452,cg03438417,cg14310703,cg16342439,cg19477084,cg00344900,cg07099588,cg03428143
chr3	126242266	126244216	3	Yes	promoter	CHST13	No	11	cg07745434,cg09737845,cg17641857,cg20712058,cg16241218,cg11572655,cg05639405,cg18165852,cg24901725,cg13844011,cg22919728	13	cg07745434,cg09737845,cg17641857,cg20712058,cg16241218,cg11572655,cg05639405,cg18165852,cg24901725,cg13844011,cg17770792,cg22919728,cg09855332
chr3	126372727	126374716	3	Yes	intergenic	NA	No	6	cg06312789,cg24746522,cg16285380,cg04469346,cg05671241,cg00233756	9	cg17002133,cg06312789,cg24746522,cg09790614,cg26448962,cg16285380,cg04469346,cg05671241,cg00349736
chr3	126421844	126424502	3	Yes	promoter	CHCHD6	Yes	15	cg01383997,cg13517305,cg05666842,cg10523996,cg08941759,cg04415434,cg00906088,cg00694512,cg03198275,cg09894040,cg03209809,cg27308130,cg17408686,cg18026197,cg16218340	18	cg01383997,cg13517305,cg05666842,cg10523996,cg08941759,cg04415434,cg00906088,cg00694512,cg03198275,cg22779920,cg09894040,cg03209809,cg20302111,cg27308130,cg17408686,cg18026197,cg16218340,cg13013538
chr3	127173842	127176689	3	Yes	intergenic	NA	No	12	cg24690054,cg10678427,cg00473416,cg14616574,cg08216768,cg05956462,cg26076428,cg17821168,cg25707924,cg00975270,cg20738807,cg03987639	11	cg24690054,cg10678427,cg00473416,cg14616574,cg08216768,cg05956462,cg17821168,cg25707924,cg00975270,cg20738807,cg03987639
chr3	127347729	127349420	3	Yes	promoter	PODXL2	No	8	cg27282987,cg02782895,cg04739570,cg01986605,cg12943155,cg07558287,cg10451772,cg26019680	9	cg27282987,cg02782895,cg05746918,cg04739570,cg01986605,cg12943155,cg07558287,cg10451772,cg26019680
chr3	127540567	127542917	3	Yes	promoter	MGLL	No	7	cg02116612,cg02503763,cg06492496,cg02328223,cg00149976,cg00245192,cg04155862	10	cg02116612,cg02503763,cg07402365,cg06492496,cg00149976,cg00245192,cg14160533,cg00276606,cg07352639,cg04155862
chr3	127794377	127796886	3	Yes	promoter	RNU2-37P,RUVBL1-AS1	Yes	6	cg14772800,cg08668199,cg13719885,cg05939970,cg00581422,cg12158737	9	cg02052154,cg14772800,cg08668199,cg13719885,cg05939970,cg00581422,cg12158737,cg03271263,cg26418856
chr3	128150497	128153292	3	Yes	intergenic	NA	Yes	7	cg04578792,cg21283081,cg25841608,cg06040998,cg25834130,cg17340391,cg06705862	6	cg04578792,cg21283081,cg25841608,cg06040998,cg25834130,cg06705862
chr3	128200426	128212798	2	Yes	promoter	GATA2,RP11-475N22.4	No	45	cg13483882,cg19638477,cg22122410,cg06490988,cg16674492,cg02436004,cg25772723,cg19759549,cg22978620,cg03839949,cg07841173,cg22801992,cg00241663,cg13808674,cg14784847,cg02980693,cg10310237,cg21435190,cg02574526,cg13442299,cg12356743,cg09024124,cg23520930,cg25686860,cg00847029,cg22931738,cg06722144,cg18065337,cg02836487,cg04347582,cg08755743,cg07263393,cg09852607,cg06115614,cg06796779,cg01102073,cg2…	50	cg02856377,cg17642618,cg13483882,cg19638477,cg22122410,cg21675036,cg25395660,cg06490988,cg16674492,cg02436004,cg25772723,cg19759549,cg03839949,cg27106398,cg07841173,cg22801992,cg19301963,cg13808674,cg02980693,cg21435190,cg21294440,cg02574526,cg13442299,cg12356743,cg21712811,cg09024124,cg23520930,cg25686860,cg00847029,cg22931738,cg14415990,cg18065337,cg02836487,cg23335389,cg04347582,cg08755743,cg0…
chr3	128214897	128217336	2	Yes	gene body	RP11-475N22.4	Yes	6	cg24954207,cg07693037,cg00037153,cg18746336,cg01757168,cg01571001	6	cg24954207,cg07693037,cg00037153,cg18746336,cg01757168,cg01571001
chr3	128711529	128713686	3	Yes	promoter	KIAA1257	No	11	cg18521796,cg00384205,cg14881178,cg20354580,cg06196147,cg27640833,cg14768782,cg04740599,cg24301690,cg13740709,cg02727530	13	cg18521796,cg12273777,cg00384205,cg14881178,cg20354580,cg06196147,cg27640833,cg14768782,cg04740599,cg24301690,cg13740709,cg02727530,cg05421258
chr3	128719051	128723234	2	Yes	promoter	EFCC1,KIAA1257	No	14	cg20255667,cg02484127,cg14091208,cg19380499,cg03406011,cg20230732,cg25664338,cg02604524,cg20506715,cg11616380,cg11641611,cg15087448,cg19611175,cg00112465	16	cg20255667,cg02484127,cg14091208,cg19380499,cg03406011,cg07957031,cg20230732,cg25664338,cg20506715,cg11616380,cg11641611,cg15087448,cg19611175,cg00112465,cg22290325,cg26665746
chr3	128745123	128746785	3	Yes	gene body	EFCC1	Yes	4	cg14511273,cg09444327,cg17773763,cg01601299	4	cg14511273,cg09444327,cg17773763,cg01601299
chr3	129322636	129326767	3	Yes	promoter	PLXND1	No	10	cg03849731,cg12091346,cg02724127,cg11199036,cg24770850,cg22902177,cg00618865,cg01060026,cg04506190,cg02544002	14	cg03849731,cg11873026,cg12091346,cg02724127,cg11199036,cg00522581,cg24770850,cg08106667,cg22902177,cg00618865,cg01060026,cg04506190,cg15482002,cg02544002
chr3	129692699	129695390	2	Yes	promoter	TRH	No	14	cg21217577,cg00414292,cg08195943,cg22931604,cg14595003,cg05013728,cg05835982,cg01009664,cg02700891,cg22512438,cg11940285,cg18862481,cg15120497,cg17173166	19	cg00414292,cg08195943,cg22931604,cg14595003,cg05013728,cg05835982,cg01009664,cg02700891,cg22512438,cg11940285,cg18862481,cg09523390,cg07520159,cg07849604,cg27444828,cg18058940,cg15120497,cg17173166,cg25321844
chr3	130063762	130065396	3	Yes	promoter	COL6A5	No	5	cg23083277,cg16204009,cg20962137,cg11225297,cg08963132	7	cg23083277,cg16204009,cg20962137,cg11225297,cg08963132,cg18959539,cg04059611
chr3	130234972	130237125	3	Yes	intergenic	NA	No	6	cg13581422,cg26958735,cg09685182,cg21858485,cg02264082,cg01980311	5	cg13581422,cg26958735,cg21858485,cg02264082,cg01980311
chr3	131751784	131754272	3	Yes	promoter	CPNE4	No	8	cg00068155,cg07671586,cg07846081,cg20559608,cg16285203,cg10526942,cg15493073,cg05673098	8	cg00068155,cg07671586,cg07846081,cg20559608,cg16285203,cg10526942,cg15493073,cg05673098
chr3	132756119	132758734	3	Yes	promoter	RP11-469L4.1,TMEM108	No	16	cg08839267,cg10211298,cg19430967,cg26143045,cg14423735,cg26099138,cg09090724,cg02745211,cg24198558,cg18115215,cg06288251,cg05075118,cg17385936,cg18542368,cg18538340,cg00871560	18	cg08839267,cg10211298,cg19430967,cg26143045,cg14423735,cg26099138,cg09090724,cg02745211,cg24198558,cg18115215,cg06288251,cg05075118,cg17385936,cg18542368,cg18538340,cg00871560,cg07751757,cg16661790
chr3	133392534	133394120	3	Yes	gene body	TFP1	Yes	6	cg15921876,cg27014380,cg04359584,cg24405999,cg00478710,cg23058124	6	cg15921876,cg27014380,cg04359584,cg24405999,cg00478710,cg23058124
chr3	133612444	133615836	3	Yes	promoter	RAB6B	No	14	cg19793598,cg19529551,cg17669438,cg05393726,cg06784845,cg15224187,cg08754625,cg20983617,cg01894743,cg13547803,cg20591405,cg06681566,cg05614904,cg16954004	15	cg19793598,cg19529551,cg17669438,cg05393726,cg15224187,cg08754625,cg01894743,cg13547803,cg21028251,cg16112120,cg20591405,cg06681566,cg11589947,cg16954004,cg01111341
chr3	133645445	133647272	3	Yes	gene body	C3orf36	Yes	5	cg10959999,cg26179679,cg17334114,cg07356486,cg00819338	5	cg10959999,cg26179679,cg17334114,cg07356486,cg00819338
chr3	133747037	133750068	3	Yes	promoter	SLCO2A1	Yes	9	cg05430989,cg07780818,cg19591206,cg12118082,cg14786024,cg02496728,cg07708788,cg22822824,cg25598319	11	cg06745124,cg05430989,cg07780818,cg17839113,cg26556923,cg19591206,cg12118082,cg02496728,cg07708788,cg22822824,cg25598319
chr3	134031032	134034388	1	Yes	promoter	RP11-200A1.1	Yes	8	cg23468456,cg03669143,cg26387619,cg17631972,cg12118013,cg25646708,cg01342115,cg19234738	9	cg23468456,cg03669143,cg26387619,cg22071944,cg17631972,cg12118013,cg25646708,cg01342115,cg19234738
chr3	134124012	134127150	1	Yes	intergenic	NA	No	11	cg18358061,cg08090496,cg05339588,cg07437373,cg16909408,cg04361551,cg02924943,cg03479065,cg09856367,cg18130622,cg14070204	11	cg18358061,cg08090496,cg05339588,cg07437373,cg16909408,cg04361551,cg02924943,cg03479065,cg09856367,cg18130622,cg14070204
chr3	134369041	134370741	3	Yes	promoter	KY	No	15	cg01442142,cg17616217,cg18294023,cg15474615,cg19856252,cg24370755,cg12573071,cg12307306,cg00060320,cg22889573,cg00329270,cg23201032,cg24675998,cg21514540,cg08140055	14	cg01442142,cg17616217,cg18294023,cg15474615,cg19856252,cg24370755,cg12573071,cg12307306,cg00060320,cg22889573,cg00329270,cg23201032,cg21514540,cg08140055
chr3	134513574	134517228	2	Yes	promoter	EPHB1	No	16	cg10791959,cg13316587,cg10608570,cg07842403,cg18150721,cg01915994,cg17801860,cg04891921,cg08173404,cg14859047,cg06070960,cg22603710,cg07283098,cg02934930,cg19937285,cg15903282	16	cg10791959,cg13316587,cg10608570,cg18150721,cg01915994,cg17801860,cg19591512,cg04891921,cg08173404,cg14859047,cg06070960,cg07283098,cg02934930,cg07304121,cg16772140,cg15903282
chr3	137478968	137491878	2	Yes	promoter	RP11-2A4.3,SOX14	No	55	cg08160826,cg15085447,cg18030833,cg16334250,cg27175819,cg16434657,cg17883458,cg20714110,cg12409982,cg06346667,cg06320828,cg18297797,cg23508813,cg08060454,cg06792417,cg24767956,cg16487237,cg00879003,cg17823751,cg14794076,cg00996758,cg09467508,cg15921949,cg10028929,cg04806447,cg08089200,cg21368820,cg05880330,cg11630154,cg22885558,cg04945331,cg03811478,cg06613095,cg08073312,cg27505273,cg10343742,cg0…	58	cg08160826,cg15085447,cg18030833,cg14648688,cg13806248,cg16334250,cg27175819,cg16434657,cg17883458,cg20714110,cg12409982,cg06346667,cg06320828,cg23508813,cg08060454,cg06792417,cg24767956,cg16487237,cg00879003,cg17823751,cg14794076,cg00996758,cg09467508,cg15921949,cg10028929,cg04806447,cg21368820,cg05880330,cg11630154,cg22885558,cg04945331,cg02736099,cg26549290,cg03811478,cg06613095,cg08073312,cg1…
chr3	138151865	138155394	2	Yes	promoter	ESYT3	No	16	cg15579376,cg01905210,cg09870568,cg20031397,cg12616277,cg26258273,cg16637178,cg15065371,cg10588034,cg16802792,cg14983698,cg21075829,cg22160121,cg11209249,cg11885357,cg09373148	15	cg15579376,cg01905210,cg09870568,cg20031397,cg12616277,cg26258273,cg16637178,cg15065371,cg10588034,cg14983698,cg21075829,cg22160121,cg11209249,cg11885357,cg09373148
chr3	138654216	138659437	2	Yes	gene body	RP11-548O1.3	No	24	cg08555653,cg14504269,cg22132508,cg21575509,cg24625136,cg02019774,cg15665928,cg06970190,cg21530266,cg11023900,cg17769084,cg07287724,cg01711746,cg05099537,cg08031151,cg24284497,cg02704158,cg02744524,cg09696159,cg26434101,cg08671343,cg14767442,cg15779737,cg01959405	23	cg08555653,cg14504269,cg22132508,cg21575509,cg24625136,cg02019774,cg15665928,cg06970190,cg21530266,cg11023900,cg07287724,cg01711746,cg05099537,cg08031151,cg24284497,cg02704158,cg02744524,cg09696159,cg26434101,cg08671343,cg14767442,cg15779737,cg01959405
chr3	138661558	138670035	2	Yes	promoter	C3orf72,FOXL2,RP11-548O1.3	No	35	cg11152347,cg09222023,cg19851029,cg27326452,cg18414754,cg11930722,cg24851181,cg09373597,cg10554436,cg25509697,cg18755942,cg11293699,cg10838925,cg01379240,cg06186698,cg17503456,cg17802942,cg04111064,cg15720669,cg25670330,cg19592439,cg13894046,cg18734304,cg05386493,cg10641721,cg25645687,cg20461912,cg23637494,cg07135614,cg17338212,cg21912060,cg04342594,cg15931949,cg22120446,cg18005180	37	cg11152347,cg12865207,cg09222023,cg19851029,cg27326452,cg18414754,cg11930722,cg24851181,cg09373597,cg10554436,cg25509697,cg18755942,cg11293699,cg10838925,cg01379240,cg06186698,cg17503456,cg17802942,cg04111064,cg15720669,cg25670330,cg19592439,cg13894046,cg18734304,cg05386493,cg17889782,cg14312526,cg10641721,cg25645687,cg20461912,cg23637494,cg07135614,cg17338212,cg21912060,cg04342594,cg22120446,cg1…
chr3	139256316	139260982	1	Yes	promoter	RBP1,RP11-319G6.1	No	21	cg22129809,cg21476463,cg06726820,cg08972081,cg02925229,cg23363832,cg15229124,cg06543018,cg27457941,cg20532370,cg09357847,cg06208339,cg11027570,cg12497564,cg24594997,cg23448348,cg12298268,cg13099330,cg15288618,cg12615535,cg14228830	21	cg22129809,cg21476463,cg06726820,cg08972081,cg02925229,cg23363832,cg15229124,cg06543018,cg27457941,cg20532370,cg22338027,cg06208339,cg11027570,cg12497564,cg24594997,cg23448348,cg12298268,cg13099330,cg15288618,cg12615535,cg14228830
chr3	139395503	139397022	3	Yes	promoter	NMNAT3	No	6	cg09721739,cg05331082,cg15878317,cg18116154,cg10799186,cg03893701	12	cg23571537,cg09721739,cg25537988,cg05331082,cg15878317,cg01046979,cg21504370,cg12447520,cg09326025,cg18116154,cg10799186,cg03893701
chr3	139652908	139655743	3	Yes	promoter	CLSTN2	No	12	cg16513416,cg25152136,cg25857710,cg22610211,cg08853659,cg10739095,cg19117365,cg02315940,cg00134776,cg01755562,cg00355389,cg14498423	14	cg16513416,cg25152136,cg25857710,cg22610211,cg08853659,cg10739095,cg19117365,cg02315940,cg11993539,cg00134776,cg01755562,cg00355389,cg14498423,cg13524876
chr3	140950568	140952307	1	Yes	promoter	ACPL2	No	7	cg22717015,cg19377384,cg22119580,cg02527459,cg16418163,cg19941450,cg22251124	5	cg22717015,cg19377384,cg16418163,cg19941450,cg22251124
chr3	141377881	141380030	3	Yes	intergenic	NA	No	3	cg03382743,cg03182596,cg06671690	2	cg03182596,cg06671690
chr3	141515486	141517373	1	Yes	gene body	GRK7	Yes	6	cg25640519,cg22639293,cg12668399,cg06822689,cg18768784,cg04472725	5	cg25640519,cg22639293,cg12668399,cg06822689,cg04472725
chr3	142314967	142317199	3	Yes	promoter	PLS1	No	9	cg20824294,cg25228755,cg21217733,cg13064457,cg24923700,cg19602919,cg22259283,cg03600697,cg00137209	9	cg20824294,cg16488116,cg25228755,cg21217733,cg13064457,cg24923700,cg22259283,cg03600697,cg00137209
chr3	142606469	142608999	1	Yes	promoter	PCOLCE2	No	15	cg19547370,cg08912146,cg22826874,cg06341749,cg10991303,cg25464457,cg19709625,cg04245439,cg05937194,cg21129615,cg19219437,cg25509174,cg04302290,cg24592912,cg01537713	21	cg19547370,cg19502769,cg15372217,cg17417439,cg13457345,cg08912146,cg22826874,cg06341749,cg10991303,cg08345405,cg25464457,cg19709625,cg04245439,cg05937194,cg21129615,cg17877674,cg19219437,cg25509174,cg04302290,cg24592912,cg01537713
chr3	142680996	142683898	1	Yes	promoter	PAQR9,RP11-372E1.6	No	14	cg08113027,cg00970325,cg08784462,cg17627617,cg04912999,cg14081924,cg27406373,cg15852572,cg15593298,cg26301689,cg25354127,cg07269003,cg11381843,cg02862761	19	cg08113027,cg00970325,cg01879805,cg13687039,cg08784462,cg04244372,cg06480793,cg14642620,cg17627617,cg04912999,cg27406373,cg15852572,cg15593298,cg26301689,cg25354127,cg07269003,cg11381843,cg24693222,cg02862761
chr3	142838617	142840892	3	Yes	promoter	CHST2	No	11	cg26399662,cg14473344,cg22536150,cg17373442,cg18507129,cg23749856,cg08774368,cg09638407,cg08858437,cg00995327,cg17815252	10	cg26399662,cg14473344,cg22536150,cg18507129,cg23749856,cg11202584,cg08774368,cg09638407,cg08858437,cg00995327
chr3	145967537	145969358	3	Yes	promoter	PLSCR4	No	9	cg06777522,cg13140770,cg24667625,cg11855022,cg01024009,cg26787035,cg13016179,cg04959837,cg11620984	11	cg20778265,cg14070815,cg06777522,cg13140770,cg24667625,cg11855022,cg01024009,cg26787035,cg13016179,cg04959837,cg11620984
chr3	147071993	147075641	2	No	gene body	RP11-649A16.1	Yes	13	cg04013024,cg19112895,cg06274857,cg27507919,cg12989851,cg25637894,cg07906632,cg08522426,cg06583576,cg17255752,cg14873600,cg18252903,cg13453374	13	cg04013024,cg19112895,cg27507919,cg12989851,cg25637894,cg07906632,cg08522426,cg06583576,cg17255752,cg14873600,cg18252903,cg13453374,cg00731494
chr3	147076150	147078000	2	Yes	gene body	RP11-649A16.1	No	9	cg24447625,cg11346837,cg22894301,cg04931256,cg02253760,cg11272515,cg10683929,cg11437253,cg00025647	7	cg24447625,cg11346837,cg22894301,cg04931256,cg11272515,cg11437253,cg00025647
chr3	147094806	147097132	3	No	intergenic	NA	No	3	cg25645064,cg00109302,cg05635730	3	cg25645064,cg05635730,cg00496939
chr3	147108254	147117280	2	Yes	promoter	ZIC4	No	40	cg00896370,cg25449440,cg03388789,cg06070263,cg03631131,cg08013557,cg08091192,cg00028935,cg18731327,cg12892506,cg18082337,cg05855917,cg02390329,cg04557018,cg18292434,cg02126051,cg22203776,cg25007283,cg26014036,cg02653559,cg03900143,cg17003736,cg00154357,cg03881775,cg27606499,cg13340636,cg01581018,cg12388007,cg07850418,cg08812189,cg00235367,cg22796509,cg27416372,cg20939084,cg18930354,cg17569743,cg0…	37	cg00896370,cg25449440,cg03388789,cg06070263,cg08013557,cg08091192,cg00028935,cg18731327,cg12892506,cg18082337,cg05855917,cg02390329,cg04557018,cg18292434,cg02126051,cg22203776,cg25007283,cg02653559,cg03900143,cg17003736,cg00154357,cg03881775,cg27606499,cg13340636,cg01581018,cg12388007,cg07850418,cg08812189,cg00235367,cg22796509,cg20939084,cg18930354,cg17569743,cg08393041,cg15105326,cg16768018,cg2…
chr3	147124833	147132521	2	Yes	promoter	ZIC1,ZIC4	No	52	cg08887742,cg12732998,cg01825295,cg18297437,cg12204258,cg16209664,cg05716671,cg19029181,cg14750948,cg25590492,cg01376826,cg17482033,cg00842299,cg23448486,cg05095591,cg06306198,cg01458605,cg05371578,cg12595013,cg26375057,cg04738965,cg01610632,cg05073035,cg02647941,cg14741939,cg18424634,cg01227537,cg14456683,cg05700079,cg26014538,cg02519751,cg17280346,cg09241332,cg15002294,cg23468878,cg16636671,cg1…	51	cg08887742,cg12732998,cg01825295,cg00365800,cg18297437,cg12204258,cg16209664,cg19029181,cg14750948,cg25590492,cg01376826,cg00842299,cg23448486,cg05095591,cg06306198,cg01458605,cg05371578,cg12595013,cg26375057,cg04738965,cg01610632,cg05073035,cg02647941,cg14741939,cg18424634,cg01227537,cg14456683,cg05700079,cg26014538,cg02519751,cg17280346,cg09241332,cg15002294,cg23468878,cg16636671,cg10107050,cg1…
chr3	147136173	147140153	2	Yes	promoter	ZIC1	Yes	16	cg19271111,cg05052450,cg11687036,cg21657087,cg03363161,cg25503888,cg22215631,cg10943786,cg02081052,cg15873149,cg02232208,cg11440030,cg08066943,cg18956933,cg20136061,cg04436207	14	cg19271111,cg05052450,cg11687036,cg21657087,cg03363161,cg02143559,cg12334869,cg25503888,cg15873149,cg17516419,cg02232208,cg18956933,cg20136061,cg04436207
chr3	147140380	147143251	2	Yes	gene body	ZIC1	Yes	15	cg21776417,cg27136844,cg00998744,cg01150433,cg23147574,cg16215422,cg26123605,cg17448336,cg14563954,cg07152216,cg17884843,cg01689438,cg15504461,cg12993715,cg14034968	15	cg21776417,cg27136844,cg00998744,cg01150433,cg23147574,cg16215422,cg26123605,cg17448336,cg14563954,cg07152216,cg17884843,cg01689438,cg15504461,cg12993715,cg14034968
chr3	148414902	148416762	3	Yes	promoter	AGTR1	No	8	cg20906621,cg21457909,cg04878152,cg04807594,cg18304969,cg22498996,cg22082709,cg05710753	9	cg20906621,cg21457909,cg04878152,cg17517206,cg18304969,cg22498996,cg22082709,cg01644447,cg05710753
chr3	152552829	152556272	3	Yes	promoter	P2RY1,RP11-38P22.2	No	10	cg06809364,cg11161961,cg03293976,cg14921522,cg06903384,cg20944305,cg14080015,cg08570275,cg05488043,cg04845053	9	cg23528795,cg06809364,cg11161961,cg14921522,cg06903384,cg20944305,cg08570275,cg05488043,cg04845053
chr3	153838021	153841970	1	Yes	promoter	ARHGEF26,ARHGEF26-AS1	No	20	cg02582963,cg06573459,cg26777729,cg18290075,cg12829666,cg27020216,cg08516222,cg05476568,cg17338501,cg02090656,cg19853927,cg02797930,cg20795139,cg09865413,cg13670911,cg10247383,cg07365816,cg01169952,cg12800244,cg00880562	26	cg02582963,cg06573459,cg26777729,cg18290075,cg12829666,cg27020216,cg08516222,cg05476568,cg17338501,cg02090656,cg19853927,cg02797930,cg20795139,cg09865413,cg13670911,cg10247383,cg07365816,cg01169952,cg21815551,cg12800244,cg10438357,cg20343797,cg01317989,cg10844309,cg26700419,cg00880562
chr3	154144982	154147627	3	Yes	promoter	GPR149	No	8	cg04919274,cg02589901,cg26856316,cg08447525,cg04151278,cg00046499,cg16619395,cg20498859	8	cg04919274,cg02589901,cg26856316,cg08447525,cg04151278,cg00046499,cg16619395,cg20498859
chr3	156008382	156010261	3	Yes	promoter	KCNAB1	No	7	cg00324161,cg07245341,cg13736068,cg02251742,cg01800345,cg12963611,cg12598089	9	cg00324161,cg02900223,cg22844085,cg07245341,cg13736068,cg01800345,cg12963611,cg01803808,cg12598089
chr3	156533164	156536030	1	Yes	promoter	LINC00886	No	4	cg14241507,cg08980237,cg09401099,cg03277049	7	cg08033349,cg14241507,cg26523284,cg08980237,cg09401099,cg03277049,cg15949117
chr3	156543100	156545653	1	Yes	promoter	LEKR1	No	10	cg02354125,cg01399540,cg25510282,cg03445587,cg16142707,cg09664259,cg00968241,cg08832018,cg01201279,cg18040826	13	cg11545232,cg02354125,cg03796466,cg01399540,cg07604896,cg25510282,cg03445587,cg16142707,cg09664259,cg00968241,cg08832018,cg01201279,cg18040826
chr3	157154075	157156978	1	Yes	promoter	PTX3	No	10	cg27026615,cg23502565,cg01018701,cg02043373,cg27558283,cg27604416,cg20052751,cg15565872,cg05670461,cg11299991	12	cg27026615,cg23502565,cg01018701,cg02043373,cg27558283,cg27604416,cg20052751,cg15565872,cg05670461,cg06687052,cg11299991,cg19073688
chr3	157811612	157814562	2	Yes	intergenic	NA	No	11	cg21552242,cg25506747,cg27642784,cg05091238,cg08654915,cg10526277,cg27361370,cg18143296,cg06570224,cg12453631,cg25103417	11	cg21552242,cg25506747,cg27642784,cg05091238,cg08654915,cg10526277,cg27361370,cg18143296,cg06570224,cg12453631,cg25103417
chr3	157814731	157817437	3	Yes	gene body	SHOX2	No	7	cg21437028,cg00089486,cg09095222,cg05401764,cg03458172,cg12315391,cg00303223	8	cg06759819,cg21437028,cg00089486,cg09095222,cg05401764,cg03458172,cg12315391,cg00303223
chr3	157819964	157826034	2	Yes	promoter	RSRC1,SHOX2	No	23	cg24317285,cg00591153,cg25460158,cg21503297,cg15548431,cg17191178,cg14961949,cg25694447,cg26129769,cg25977493,cg06156376,cg16703882,cg18899952,cg04532033,cg01557547,cg09220088,cg04913979,cg05512327,cg20501518,cg09542210,cg12993163,cg04521004,cg18194945	27	cg24317285,cg00591153,cg25460158,cg21503297,cg15548431,cg17191178,cg14961949,cg25694447,cg26129769,cg04966997,cg05806916,cg25977493,cg06156376,cg25651278,cg16703882,cg18899952,cg01557547,cg09220088,cg04913979,cg05512327,cg20501518,cg09542210,cg12993163,cg04521004,cg07478108,cg23963540,cg18194945
chr3	158288177	158289908	1	Yes	promoter	MLF1,RP11-538P18.2	No	12	cg17222452,cg20182358,cg16627395,cg09371798,cg05743054,cg07297582,cg21767902,cg19865133,cg21074827,cg01892874,cg23065100,cg19714489	12	cg17222452,cg17002576,cg20182358,cg16627395,cg09371798,cg05743054,cg07297582,cg21767902,cg19865133,cg21074827,cg20855411,cg23065100
chr3	158449022	158451305	3	Yes	promoter	RARRES1,RP11-379F4.4	No	9	cg08977270,cg08697665,cg18349298,cg14226182,cg03269060,cg13189235,cg11188318,cg07693931,cg09503974	11	cg08977270,cg08697665,cg18349298,cg14226182,cg26897744,cg03269060,cg13189235,cg16997058,cg19071579,cg07693931,cg09503974
chr3	158518447	158520950	3	Yes	promoter	MFSD1,RP11-379F4.9	No	15	cg15548427,cg09459188,cg23208397,cg12745387,cg20216950,cg19403653,cg16289538,cg06667063,cg07765813,cg26149032,cg25050026,cg11632438,cg24324441,cg13419925,cg01971181	17	cg15548427,cg09459188,cg26582975,cg23208397,cg12745387,cg20216950,cg18867955,cg19403653,cg16289538,cg06667063,cg07765813,cg26149032,cg25050026,cg11632438,cg24324441,cg13419925,cg01971181
chr3	159705915	159707531	3	Yes	promoter	IL12A	No	12	cg20515136,cg21718660,cg26788993,cg01308501,cg23537865,cg15997088,cg12583659,cg08017498,cg13775495,cg25777557,cg25829945,cg20524905	12	cg20515136,cg21718660,cg26788993,cg01308501,cg15997088,cg12583659,cg08017498,cg13775495,cg25777557,cg11696249,cg25829945,cg20524905
chr3	159756122	159757681	3	Yes	gene body	IL12A-AS1	No	7	cg01392539,cg04322363,cg22500555,cg17094985,cg26772854,cg15998779,cg22878441	8	cg01392539,cg07743759,cg04322363,cg22500555,cg17094985,cg26772854,cg15998779,cg22878441
chr3	159941736	159945149	2	Yes	promoter	C3orf80,IL12A-AS1,RP11-431I8.1	No	15	cg25923450,cg06844012,cg22591103,cg21527132,cg15772223,cg04470066,cg16800028,cg15077376,cg02557406,cg12177207,cg18703913,cg08565139,cg03894490,cg13036381,cg03281561	15	cg25923450,cg06844012,cg02152739,cg22987353,cg07627706,cg21527132,cg15772223,cg04470066,cg23851169,cg16800028,cg12177207,cg18703913,cg08565139,cg03894490,cg03281561
chr3	160471644	160473348	1	Yes	promoter	PPM1L,RP11-16N11.2	No	4	cg11663289,cg12711974,cg07700234,cg07466892	8	cg11663289,cg06231587,cg17525879,cg14936028,cg12711974,cg07006407,cg07700234,cg07466892
chr3	160473350	160476680	3	Yes	promoter	PPM1L,RP11-16N11.2	No	11	cg02470874,cg01357135,cg22132509,cg04056576,cg04132452,cg11892747,cg08377768,cg18481087,cg00089353,cg11411107,cg22637730	10	cg02470874,cg01357135,cg22132509,cg04056576,cg04132452,cg11892747,cg08377768,cg18481087,cg00089353,cg11411107
chr3	160821704	160823744	1	Yes	promoter	B3GALNT1	No	15	cg23730617,cg12927753,cg05725721,cg00160619,cg13279566,cg12716838,cg13072057,cg20841906,cg16496687,cg25635352,cg25469234,cg23252387,cg12349858,cg21146905,cg12881321	22	cg23730617,cg12927753,cg05725721,cg12636819,cg00160619,cg13279566,cg12716838,cg04977216,cg13072057,cg00113363,cg05305733,cg11081799,cg20841906,cg16496687,cg02848533,cg25635352,cg05034443,cg25469234,cg23252387,cg12349858,cg08314989,cg19649707
chr3	161088388	161091469	1	Yes	promoter	SPTSSB	No	18	cg04691961,cg16845623,cg18919097,cg20481171,cg27118968,cg15129463,cg24440593,cg08646771,cg22984041,cg03558862,cg03674157,cg18592273,cg22479710,cg02652475,cg25208215,cg06054026,cg07737236,cg02461627	21	cg04691961,cg16845623,cg18919097,cg22035566,cg18446193,cg20481171,cg27118968,cg15129463,cg24440593,cg08646771,cg22984041,cg03558862,cg03674157,cg18592273,cg22479710,cg02652475,cg25208215,cg08600583,cg06054026,cg07737236,cg02461627
chr3	164909815	164915815	3	No	promoter	SLITRK3	No	21	cg25831075,cg02580197,cg17211349,cg18989709,cg04481181,cg00466268,cg27363829,cg22126211,cg00665492,cg14717170,cg13619915,cg23626122,cg18447727,cg06020130,cg06170300,cg04228468,cg04238038,cg19532307,cg25198481,cg03177600,cg06312254	20	cg02580197,cg17211349,cg04481181,cg09269007,cg27363829,cg22126211,cg00665492,cg14717170,cg13619915,cg23626122,cg18447727,cg06020130,cg06170300,cg04228468,cg04238038,cg19532307,cg25198481,cg03177600,cg06312254,cg00741295
chr3	167967541	167969689	1	Yes	intergenic	NA	No	5	cg01441497,cg13304297,cg20620272,cg19470159,cg05531255	5	cg01441497,cg13304297,cg20620272,cg19470159,cg05531255
chr3	168862334	168867999	3	Yes	promoter	MECOM	No	20	cg24848349,cg16162350,cg23197191,cg20201475,cg16498736,cg14983529,cg27533237,cg02556393,cg03347416,cg16455008,cg06626126,cg26792116,cg13147822,cg07751698,cg14228238,cg26058714,cg06238409,cg19848683,cg01083380,cg00962903	28	cg24848349,cg16162350,cg23197191,cg20201475,cg16498736,cg14983529,cg00972922,cg27533237,cg15143202,cg15977109,cg25472638,cg03347416,cg16455008,cg26792116,cg09761088,cg06934851,cg12280209,cg14370485,cg13117777,cg15921757,cg13147822,cg09287405,cg07751698,cg14228238,cg26058714,cg06238409,cg19848683,cg00962903
chr3	169375271	169380387	3	Yes	promoter	MECOM	Yes	14	cg15958576,cg10903116,cg19986202,cg22878627,cg06201393,cg01277372,cg00988247,cg20096204,cg03679456,cg00024967,cg08004073,cg11123595,cg07378762,cg25702780	16	cg15958576,cg10903116,cg19986202,cg12515314,cg22878627,cg06201393,cg01277372,cg00988247,cg16640034,cg20096204,cg03679456,cg00024967,cg08004073,cg11123595,cg07378762,cg25702780
chr3	169380877	169388201	2	Yes	promoter	MECOM	Yes	21	cg16622863,cg26394174,cg02068090,cg16948053,cg07231955,cg17200447,cg15328265,cg17662182,cg17218628,cg10703884,cg14580747,cg04120686,cg09380805,cg19825437,cg20203114,cg21545313,cg10600701,cg05656590,cg13243219,cg11590700,cg10953508	28	cg16622863,cg26394174,cg02068090,cg16948053,cg07231955,cg17200447,cg15328265,cg17662182,cg17218628,cg14358026,cg10703884,cg14580747,cg04120686,cg09380805,cg19825437,cg06603936,cg20203114,cg21545313,cg10600701,cg09635597,cg05656590,cg12034765,cg17708456,cg13243219,cg00279054,cg03078689,cg11590700,cg10953508
chr3	169528769	169532179	1	Yes	promoter	LRRC34	No	14	cg18171097,cg10994914,cg03369965,cg12324144,cg02860240,cg08095637,cg12358524,cg12397426,cg27536453,cg16306190,cg17737146,cg00121634,cg00832555,cg08193579	20	cg10994914,cg13337095,cg03369965,cg12324144,cg05344026,cg04714994,cg27467234,cg16024214,cg23707559,cg24655016,cg02860240,cg08095637,cg12358524,cg12397426,cg27536453,cg16306190,cg17737146,cg00121634,cg00832555,cg08193579
chr3	170135816	170138893	3	Yes	promoter	CLDN11	Yes	17	cg20794824,cg06023994,cg05022688,cg17078427,cg12741994,cg00894757,cg20449692,cg02241055,cg07042832,cg21389743,cg21474897,cg07137845,cg07434518,cg11145160,cg13879776,cg13333304,cg20924286	17	cg20794824,cg06023994,cg07126617,cg17078427,cg12741994,cg00894757,cg20449692,cg03916832,cg09281405,cg02241055,cg07042832,cg07137845,cg07434518,cg11145160,cg13879776,cg13333304,cg20924286
chr3	170302001	170304541	3	Yes	promoter	SLC7A14	No	14	cg15536845,cg03658578,cg18278638,cg18774195,cg21884231,cg04386206,cg05937737,cg14051544,cg21154627,cg14873240,cg07766263,cg05663573,cg09543255,cg21369231	14	cg18923408,cg15536845,cg03658578,cg18774195,cg21884231,cg04386206,cg05937737,cg14051544,cg21154627,cg14873240,cg07766263,cg05663573,cg09543255,cg21369231
chr3	170624528	170627169	1	Yes	promoter	EIF5A2	No	14	cg06749174,cg07728092,cg16450309,cg13575298,cg17807528,cg12598803,cg05460130,cg26209058,cg02728558,cg27555382,cg12897942,cg10541755,cg10717907,cg02008818	14	cg06749174,cg07728092,cg16450309,cg13575298,cg17807528,cg12598803,cg05460130,cg26209058,cg02728558,cg27555382,cg12897942,cg10541755,cg10717907,cg02008818
chr3	170745588	170747128	3	Yes	intergenic	NA	No	7	cg01423389,cg25203962,cg14777768,cg07139301,cg01146875,cg24302235,cg03699904	8	cg01423389,cg25203962,cg14777768,cg07139301,cg01146875,cg24302235,cg03699904,cg00264528
chr3	171174573	171180551	1	Yes	promoter	TNIK	Yes	16	cg14975410,cg20532972,cg05596664,cg21341150,cg05676543,cg15831032,cg21413905,cg13242787,cg07203134,cg08453030,cg23533254,cg00859352,cg26065488,cg22877570,cg23146833,cg14576319	16	cg14975410,cg20532972,cg05596664,cg21341150,cg05676543,cg21413905,cg07203134,cg05126860,cg08481061,cg08453030,cg23533254,cg00859352,cg26065488,cg22877570,cg23146833,cg14576319
chr3	171526831	171529745	3	Yes	promoter	PLD1,PP13439	No	8	cg07560922,cg17024257,cg00082310,cg18295203,cg02620939,cg27299660,cg02371119,cg17566735	14	cg19930657,cg26752773,cg14000730,cg14155246,cg07560922,cg17024257,cg25103338,cg00082310,cg18295203,cg27299660,cg26589591,cg12685894,cg02371119,cg17566735
chr3	172165253	172168285	2	Yes	promoter	GHSR	No	16	cg07393736,cg06737494,cg23500122,cg22070855,cg04851268,cg22459146,cg07848409,cg11812218,cg14768785,cg17152757,cg24599434,cg15987088,cg07852825,cg10109500,cg03587978,cg18875012	20	cg07393736,cg06737494,cg23500122,cg22070855,cg04851268,cg22459146,cg07848409,cg11812218,cg14768785,cg07430214,cg21310911,cg18619151,cg18895189,cg17152757,cg24599434,cg15987088,cg07852825,cg10109500,cg03587978,cg18875012
chr3	173112188	173117471	3	Yes	promoter	NLGN1	No	26	cg09229620,cg21946824,cg21459053,cg05722552,cg01946530,cg17587648,cg07489890,cg27315556,cg05543049,cg11733675,cg16419629,cg04812049,cg13238990,cg19245371,cg03729941,cg09527109,cg25856888,cg18413587,cg13519184,cg13147717,cg03865648,cg00100892,cg16664532,cg12129344,cg01298010,cg01893322	24	cg09229620,cg21946824,cg21459053,cg26411143,cg05722552,cg01946530,cg17587648,cg07489890,cg27315556,cg05543049,cg11733675,cg04812049,cg13238990,cg19245371,cg03729941,cg25856888,cg18413587,cg13519184,cg13147717,cg03865648,cg16664532,cg12129344,cg01298010,cg01893322
chr3	179753084	179755851	1	Yes	promoter	PEX5L	No	12	cg05131623,cg21176048,cg18780412,cg21564242,cg04894619,cg13473356,cg02119363,cg23346462,cg02009585,cg23756251,cg03175305,cg02430692	12	cg13062105,cg05131623,cg21176048,cg18780412,cg12864915,cg21564242,cg04894619,cg13473356,cg02119363,cg23346462,cg23756251,cg02430692
chr3	181412364	181414985	3	Yes	intergenic	NA	Yes	10	cg01530605,cg21453451,cg18562243,cg07304175,cg24267283,cg10263682,cg03880173,cg23978504,cg08196553,cg16246169	12	cg01530605,cg21453451,cg18562243,cg07304175,cg24267283,cg10263682,cg10015784,cg03880173,cg23978504,cg08196553,cg16246169,cg17547199
chr3	181419349	181422950	3	No	intergenic	NA	Yes	8	cg23165310,cg08488945,cg20675389,cg16276063,cg02213103,cg20691722,cg18184251,cg16661554	9	cg23165310,cg08488945,cg14420954,cg16276063,cg02213103,cg20691722,cg18184251,cg16661554,cg04356194
chr3	181440692	181449347	3	Yes	intergenic	NA	Yes	28	cg27622017,cg16955889,cg25382400,cg20180061,cg20177650,cg27022956,cg14311670,cg17202313,cg14317285,cg18366455,cg04859466,cg05513983,cg08085357,cg00195796,cg22256631,cg03783410,cg03731303,cg11362010,cg01783662,cg10901368,cg27622679,cg11324832,cg25960893,cg13294849,cg02650401,cg17894318,cg22920300,cg25109019	30	cg27622017,cg04877317,cg01693519,cg09827513,cg16955889,cg25382400,cg20180061,cg20177650,cg14311670,cg17202313,cg14317285,cg18366455,cg04859466,cg05513983,cg08085357,cg00195796,cg22256631,cg03783410,cg02478231,cg03731303,cg02602610,cg11362010,cg01783662,cg10901368,cg27622679,cg25960893,cg13294849,cg02650401,cg17894318,cg25109019
chr3	182511696	182513694	3	Yes	promoter	ATP11B,RP11-225N10.1	No	3	cg19617080,cg18868788,cg05977900	3	cg19617080,cg18868788,cg05977900
chr3	182879306	182881110	3	Yes	promoter	LAMP3	No	9	cg25867545,cg07334977,cg24615528,cg19825758,cg02072885,cg01698108,cg00119079,cg20742009,cg02345747	10	cg25867545,cg07334977,cg24615528,cg02072885,cg01698108,cg00119079,cg00748903,cg14552744,cg20742009,cg02345747
chr3	182896087	182898527	3	Yes	gene body	MCF2L2	No	6	cg06170203,cg00794178,cg20724810,cg21857959,cg02929310,cg17323383	7	cg19070967,cg06170203,cg00794178,cg20724810,cg21857959,cg02929310,cg17323383
chr3	182970123	182973681	1	Yes	promoter	B3GNT5	Yes	20	cg21794419,cg23655039,cg26215406,cg03657573,cg02958321,cg11102611,cg16579954,cg05658593,cg27034902,cg02238826,cg16938490,cg12930573,cg20585088,cg19998675,cg15510249,cg01720186,cg17701886,cg27324128,cg21450829,cg26436136	21	cg21794419,cg23655039,cg26215406,cg03657573,cg02958321,cg11102611,cg16579954,cg05658593,cg27034902,cg07740476,cg02238826,cg16938490,cg12930573,cg20585088,cg19998675,cg15510249,cg01720186,cg17701886,cg21450829,cg26436136,cg24926963
chr3	183143913	183147500	1	Yes	promoter	MCF2L2	No	16	cg25214424,cg25416014,cg05176569,cg21478177,cg02510164,cg20822109,cg01650457,cg20696912,cg02836020,cg13885451,cg07070178,cg27239157,cg21200353,cg25737410,cg01192748,cg17614995	19	cg25214424,cg25416014,cg05176569,cg21478177,cg02510164,cg20822109,cg01650457,cg24702756,cg20696912,cg02836020,cg09156602,cg13885451,cg07070178,cg27239157,cg04339457,cg21200353,cg25737410,cg01192748,cg17614995
chr3	183946385	183949328	2	Yes	promoter	VWA5B2	No	13	cg24643062,cg23762779,cg23155810,cg18721026,cg09065654,cg27270388,cg24950182,cg00333034,cg07952156,cg20495429,cg15135638,cg12105765,cg13950290	15	cg24643062,cg23762779,cg23155810,cg18721026,cg09065654,cg27270388,cg24950182,cg00333034,cg14440047,cg03747608,cg07952156,cg20495429,cg15135638,cg12105765,cg13950290
chr3	183977818	183981269	3	Yes	promoter	CAMK2N2	Yes	11	cg05951558,cg07460919,cg03835095,cg22700017,cg23749739,cg12232835,cg08770580,cg08574156,cg07864323,cg09970348,cg05088549	13	cg05951558,cg05780875,cg07460919,cg23600059,cg03835095,cg00763993,cg22700017,cg23749739,cg12232835,cg08770580,cg07864323,cg09970348,cg05088549
chr3	184077610	184079655	3	Yes	promoter	CLCN2,POLR2H	Yes	3	cg08808811,cg08235912,cg22613010	6	cg08808811,cg08235912,cg22613010,cg12513061,cg05035332,cg15379294
chr3	184095118	184100118	3	Yes	promoter	CHRD,THPO	No	13	cg18418186,cg09219093,cg06387842,cg22833027,cg20766467,cg25182621,cg14047271,cg22957206,cg08032525,cg09736922,cg20379919,cg11819637,cg16469223	23	cg20153590,cg25923606,cg22744090,cg09219093,cg06387842,cg11864609,cg22833027,cg07944907,cg10531688,cg12009049,cg11779310,cg26961482,cg25182621,cg14047271,cg24717158,cg16810230,cg22957206,cg08032525,cg09736922,cg20379919,cg11819637,cg16469223,cg20655637
chr3	184230699	184232710	3	Yes	gene body	EIF2B5	No	6	cg22579624,cg15620294,cg07272305,cg15718583,cg04153822,cg03706720	6	cg22579624,cg15620294,cg07272305,cg15718583,cg04153822,cg03706720
[truncated: 4,477 more rows]

## Sheet: HC H3K4me3 only
chromosome	start	end	CpG_Island	GenePos	Gene	Fantom5_Enh	probes450K	TargetID_450K	probesEpic	TargetID_Epic
[truncated: 11,966 more rows]

[truncated: 1 more sheets: HC H3K27me3 only]
